# Supplementary material for: Transcription factors CEP‐1/p53 and CEH‐23 collaborate with AAK‐2/AMPK to modulate longevity in Caenorhabditis elegans
Source: PubMed Central journal article supplement (PMC5506430; doi:10.1111/acel.12619), 2017-05-30
Supplement: ACEL-16-814-s004.pdf [file ACEL-16-814-s004.pdf]

**Table S1: Adult lifespan of all individual experiments.**

**A. Epistasis between *ceh-23(ms23)* and *cep-1(gk138)* on *isp-1(qm150)* longevity**

| A.1                                                  |                    | LS32                 |                |                        |                |               |                                |                               |
|------------------------------------------------------|--------------------|----------------------|----------------|------------------------|----------------|---------------|--------------------------------|-------------------------------|
| Strain                                               | N (post censoring) | mean LS ± SEM (days) | % change to wt | median LS ± SEM (days) | % change to wt | P-value vs wt | P-value vs <i>ceh-23;isp-1</i> | P-value vs <i>cep-1;isp-1</i> |
| WT(N2)                                               | 97                 | 20.21±0.21           |                | 20±0.18                |                |               | 1.97E-24                       | 5.81E-24                      |
| <i>isp-1(qm150)</i>                                  | 91                 | 27.72±0.31           | 37.19          | 28±0.36                | 40.00          | 5.81E-24      | 4.59E-04                       | 1.17E-07                      |
| <i>ceh-23(ms23);isp-1(qm150)</i>                     | 96                 | 25.44±0.40           | 25.89          | 24±0.45                | 20.00          | 3.59E-38      |                                | 3.04E-01                      |
| <i>cep-1(gk138);isp-1(qm150)(qm150)</i>              | 96                 | 25.00±0.33           | 23.66          | 24±0.40                | 20.00          | 1.97E-24      | 3.04E-01                       |                               |
| <i>cep-1(gk138);ceh-23(ms23);isp-1(qm150) iso.2</i>  | 88                 | 23.64±0.32           | 16.99          | 24±0.36                | 20.00          | 5.03E-16      | 2.68E-04                       | 2.08E-03                      |
| <i>cep-1(gk138);ceh-23(ms23);isp-1(qm150) iso.22</i> | 75                 | 24.00±0.41           | 18.78          | 24±0.44                | 20.00          | 6.44E-15      | 3.57E-02                       | 9.12E-02                      |

| A.2                                                  |                    | LS35                 |                |                        |                |               |                                |                               |
|------------------------------------------------------|--------------------|----------------------|----------------|------------------------|----------------|---------------|--------------------------------|-------------------------------|
| Strain                                               | N (post censoring) | mean LS ± SEM (days) | % change to wt | median LS ± SEM (days) | % change to wt | P-value vs wt | P-value vs <i>ceh-23;isp-1</i> | P-value vs <i>cep-1;isp-1</i> |
| WT (N2)                                              | 100                | 19.5±0.19            |                | 20±0.21                |                |               | 2.43E-26                       | 2.80E-28                      |
| <i>isp-1(qm150)</i>                                  | 97                 | 28.52±0.3            | 46.23          | 28±0.37                | 40.00          | 2.30E-46      | 3.54E-17                       | 4.48E-21                      |
| <i>ceh-23(ms23);isp-1(qm150)</i>                     | 92                 | 24.35±0.34           | 24.86          | 24±0.47                | 20.00          | 2.43E-26      |                                | 3.29E-01                      |
| <i>cep-1(gk138);isp-1(qm150)</i>                     | 100                | 24.18±0.28           | 24.02          | 24±0.38                | 20.00          | 2.80E-28      | 3.29E-01                       |                               |
| <i>cep-1(gk138);ceh-23(ms23);isp-1(qm150) iso. 1</i> | 86                 | 24.4±0.34            | 25.12          | 24±0.5                 | 20.00          | 1.01E-25      | 9.31E-01                       | 3.16E-01                      |
| <i>cep-1(gk138);ceh-23(ms23);isp-1(qm150) iso. 2</i> | 77                 | 24.42±0.36           | 25.21          | 24±0.7                 | 20.00          | 3.54E-23      | 7.36E-01                       | 2.31E-01                      |
| <i>cep-1(gk138);ceh-23(ms23);isp-1(qm150) iso. 3</i> | 85                 | 24.5±0.36            | 25.62          | 24±0.64                | 20.00          | 1.17E-24      | 4.94E-01                       | 1.14E-01                      |

**B. Requirement of CEH-23 and CEP-1 in various ETC mutants**

| B.1                                    |                    | LS33                 |                |                        |                |               |                                |
|----------------------------------------|--------------------|----------------------|----------------|------------------------|----------------|---------------|--------------------------------|
| Strain                                 | N (post censoring) | mean LS ± SEM (days) | % change to wt | median LS ± SEM (days) | % change to wt | P-value vs wt | P-value vs <i>nuo-6(qm200)</i> |
| WT(N2)                                 | 106                | 18.85±0.25           |                | 20±0.25                |                |               | 1.01E-32                       |
| <i>nuo-6(qm200)</i>                    | 80                 | 30.88±0.67           | 63.84          | 30±0.78                | 50.00          | 1.01E-32      |                                |
| <i>nuo-6(qm200);ceh-23(ms23) iso.1</i> | 98                 | 27.99±0.74           | 48.52          | 28±0.66                | 40.00          | 6.36E-21      | 5.22E-03                       |
| <i>nuo-6(qm200);ceh-23(ms23) iso.2</i> | 104                | 25.29±0.57           | 34.20          | 26±0.38                | 30.00          | 8.17E-20      | 4.13E-09                       |
| <i>nuo-6(qm200);ceh-23(ms23) iso.3</i> | 107                | 27.5±0.59            | 45.92          | 28±0.55                | 40.00          | 6.06E-23      | 2.89E-04                       |

| B.2                                    |                    | LS42                 |                |                        |                |               |                                |
|----------------------------------------|--------------------|----------------------|----------------|------------------------|----------------|---------------|--------------------------------|
| Strain                                 | N (post censoring) | mean LS ± SEM (days) | % change to wt | median LS ± SEM (days) | % change to wt | P-value vs wt | P-value vs <i>nuo-6(qm200)</i> |
| WT(N2)                                 | 98                 | 14.96±0.29           |                | 14±0.38                |                |               | 9.30E-02                       |
| <i>nuo-6(qm200)</i>                    | 100                | 16.1±1.38            | 7.61           | 12±0.88                | -14.29         | 9.30E-02      |                                |
| <i>nuo-6(qm200) cep-1(gk138) iso.1</i> | 93                 | 15.3±1.12            | 2.24           | 16±1.64                | 40.00          | 3.87E-01      | 4.50E-01                       |
| <i>nuo-6(qm200) cep-1(gk138) iso.2</i> | 90                 | 13.78±0.6            | -7.89          | 14±0.84                | 30.00          | 9.60E-02      | 2.50E-01                       |
| <i>nuo-6(qm200);ceh-23(ms23)</i>       | 94                 | 16.46±1.22           | 10.02          | 12±1.07                | 40.00          | 3.30E-02      | 9.98E-01                       |

| B.3                                    |                    | LS45                 |                |                        |                |               |                                |                              |                               |
|----------------------------------------|--------------------|----------------------|----------------|------------------------|----------------|---------------|--------------------------------|------------------------------|-------------------------------|
| Strain                                 | N (post censoring) | mean LS ± SEM (days) | % change to wt | median LS ± SEM (days) | % change to wt | P-value vs wt | P-value vs <i>nuo-6(qm200)</i> | P-value vs <i>mev-1(kn1)</i> | P-value vs <i>gas-1(fc21)</i> |
| WT(N2)                                 | 103                | 16.97±0.34           |                | 16±0.38                |                |               | 1.79E-24                       | 1.77E-07                     | 3.44E-15                      |
| <i>nuo-6(qm200)</i>                    | 153                | 22.85±0.33           | 34.65          | 24±0.49                | 50.00          | 1.79E-24      |                                |                              |                               |
| <i>nuo-6(qm200) cep-1(gk138) iso.1</i> | 194                | 18.51±0.42           | 9.07           | 18±0.84                | 12.50          | 1.28E-04      | 1.05E-08                       |                              |                               |
| <i>nuo-6(qm200) cep-1(gk138) iso.2</i> | 123                | 15.88±0.46           | -6.42          | 14±0.39                | -12.50         | 2.52E-01      | 3.11E-21                       |                              |                               |

|                                       |     |            |        |         |        |          |          |          |          |
|---------------------------------------|-----|------------|--------|---------|--------|----------|----------|----------|----------|
| <i>nuo-6(qm200);ceh-23(ms23)</i>      | 174 | 18.46±0.82 | 8.78   | 20±1.9  | 25.00  | 1.27E-03 | 1.75E-03 |          |          |
| <i>mev-1(kn1)</i>                     | 108 | 14±0.36    | -17.50 | 18±0.17 | -12.50 | 1.77E-07 |          |          |          |
| <i>ceh-23(ms23) mev-1(kn1)iso.1</i>   | 107 | 15.86±0.37 | -6.54  | 16±0.5  | 0.00   | 7.79E-02 |          | 5.34E-04 |          |
| <i>ceh-23(ms23) mev-1(kn1)iso.2</i>   | 96  | 15.21±0.41 | -10.37 | 16±0.56 | 0.00   | 5.66E-03 |          | 2.16E-02 |          |
| <i>cep-1(gk138);mev-1(kn1)</i>        | 105 | 19.84±0.49 | 16.91  | 18±0.95 | 12.50  | 1.35E-07 |          | 1.79E-17 |          |
| <i>gas-1(fc21)</i>                    | 106 | 13.07±0.28 | -22.98 | 14±0.27 | -12.50 | 3.44E-15 |          |          |          |
| <i>ceh-23(ms23);gas-1(fc21) iso.1</i> | 41  | 13.46±0.58 | -20.68 | 12±0.9  | -25.00 | 6.60E-07 |          |          | 3.42E-01 |
| <i>ceh-23(ms23);gas-1(fc21) iso.2</i> | 82  | 16.15±0.48 | -4.83  | 16±0.53 | 0.00   | 3.78E-01 |          |          | 3.09E-09 |
| <i>cep-1(gk138);gas-1(fc21)</i>       | 55  | 16.53±0.7  | -2.59  | 16±0.91 | 0.00   | 7.51E-01 |          |          | 2.02E-07 |

**B.4** LS47

| Strain                                | N (post censoring) | mean LS ± SEM (days) | % change to wt | median LS ± SEM (days) | % change to wt | P-value vs wt | P-value vs <i>mev-1(kn1)</i> | P-value vs <i>gas-1(fc21)</i> |
|---------------------------------------|--------------------|----------------------|----------------|------------------------|----------------|---------------|------------------------------|-------------------------------|
| WT(N2)                                | 108                | 16.18±0.27           |                | 16±0.33                |                |               | 6.05E-04                     | 3.54E-08                      |
| <i>cep-1(gk138)</i>                   | 89                 | 17.63±0.32           | 8.96           | 18±0.52                | 12.50          | 3.80E-04      |                              |                               |
| <i>ceh-23(ms23)</i>                   | 104                | 16.04±0.28           | -0.87          | 16±0.31                | 0.00           | 7.36E-01      |                              |                               |
| <i>mev-1(kn1)</i>                     | 107                | 13.92±0.38           | -13.97         | 14±0.78                | -12.50         | 6.05E-04      |                              |                               |
| <i>cep-1(gk138);mev-1(kn1)</i>        | 89                 | 17.73±0.43           | 9.58           | 18±0.6                 | 12.50          | 9.64E-04      | 1.59E-08                     |                               |
| <i>ceh-23(ms23) mev-1(kn1)iso.1</i>   | 106                | 17.85±0.53           | 10.32          | 18±0.67                | 12.50          | 4.00E-04      | 7.13E-10                     |                               |
| <i>ceh-23(ms23) mev-1(kn1)iso.2</i>   | 99                 | 20.48±0.48           | 26.58          | 22±0.64                | 37.50          | 2.54E-13      | 1.67E-21                     |                               |
| <i>ceh-23(ms23) mev-1(kn1)iso.3</i>   | 88                 | 21.92±0.56           | 35.48          | 24±0.72                | 50.00          | 1.28E-15      | 1.26E-22                     |                               |
| <i>gas-1(fc21)</i>                    | 90                 | 13.31±0.35           | -17.74         | 12±0.48                | -25.00         | 3.54E-08      |                              |                               |
| <i>cep-1(gk138);gas-1(fc21)</i>       | 101                | 18.82±0.55           | 16.32          | 20±0.92                | 25.00          | 1.98E-07      |                              | 4.80E-16                      |
| <i>ceh-23(ms23);gas-1(fc21) iso.1</i> | 93                 | 17.46±0.45           | 7.91           | 18±0.53                | 12.50          | 4.38E-04      |                              | 1.58E-12                      |
| <i>ceh-23(ms23);gas-1(fc21) iso.2</i> | 72                 | 15.26±0.63           | -5.69          | 16±0.62                | 0.00           | 8.90E-01      |                              | 6.89E-04                      |
| <i>ceh-23(ms23);gas-1(fc21) iso.3</i> | 88                 | 14.4±0.62            | -11.00         | 12±1.41                | -25.00         | 6.09E-01      |                              | 1.21E-02                      |

**B.5** LS49

| Strain                                | N (post censoring) | mean LS ± SEM (days) | % change to wt | median LS ± SEM (days) | % change to wt | P-value vs wt | P-value vs <i>gas-1(fc21)</i> |
|---------------------------------------|--------------------|----------------------|----------------|------------------------|----------------|---------------|-------------------------------|
| WT(N2)                                | 98                 | 17.44±0.37           |                | 18±0.63                |                |               | 3.12E-21                      |
| <i>ceh-23(ms23)</i>                   | 100                | 17.45±0.41           | 0.06           | 18±0.8                 | 0.00           | 6.71E-01      | 2.59E-20                      |
| <i>cep-1(gk138)</i>                   | 100                | 18.46±0.34           | 5.85           | 18±0.53                | 0.00           | 2.97E-02      | 1.51E-27                      |
| <i>gas-1(fc21)</i>                    | 84                 | 11.81±0.32           | -32.28         | 12±0.39                | -33.33         | 3.12E-21      |                               |
| <i>ceh-23(ms23);gas-1(fc21) iso.1</i> | 80                 | 18.9±0.56            | 8.37           | 20±0.89                | 11.11          | 1.90E-03      | 4.57E-20                      |
| <i>cep-1(gk138);gas-1(fc21)</i>       | 117                | 18.07±0.56           | 3.61           | 18±0.8                 | 0.00           | 8.73E-02      | 1.80E-17                      |

**C. Longevity effects of knockdown *aak-2* on the *isp-1;cep-1* and *isp-1;ceh-23* mutants**

**C.1** LS51

| Strain/treatment                       | N (post censoring) | mean LS ± SEM (days) | % change to wt/control | median LS ± SEM (days) | % change to wt/control | P-value vs wt/control | % change to <i>isp-1/control</i> (mean LS) | P-value vs <i>isp-1/control</i> | % change to L4440 control | P-value vs control treatment |
|----------------------------------------|--------------------|----------------------|------------------------|------------------------|------------------------|-----------------------|--------------------------------------------|---------------------------------|---------------------------|------------------------------|
| N2/L4440                               | 92                 | 16.81±0.36           |                        | 16±0.41                |                        |                       | -29.50                                     |                                 |                           |                              |
| N2/ <i>cep-1</i>                       | 73                 | 16.58±0.39           | -1.37                  | 16±0.44                | 0.00                   | 6.73E-01              | -30.47                                     | 6.73E-01                        | -1.382                    | 6.73E-01                     |
| N2/ <i>aak-2</i>                       | 81                 | 14.49±0.36           | -13.80                 | 14±0.68                | -12.50                 | 1.10E-05              | -39.24                                     | 1.10E-05                        | -13.812                   | 1.10E-05                     |
| <i>isp-1(qm150)/L4440</i>              | 25                 | 23.84±1.12           | 41.82                  | 24±2                   | 50.00                  | 5.15E-10              |                                            | 5.15E-10                        |                           |                              |
| <i>isp-1(qm150)/cep-1</i>              | 70                 | 18.86±0.58           | 12.20                  | 18±0.64                | 12.50                  | 6.16E-04              | -20.90                                     | 6.16E-04                        | -20.901                   | 2.32E-05                     |
| <i>isp-1(qm150)/aak-2</i>              | 43                 | 14.89±0.66           | -11.42                 | 14±0.99                | -12.50                 | 7.59E-02              | -37.55                                     | 7.59E-02                        | -37.547                   | 2.14E-09                     |
| <i>cep-1(gk138);isp-1(qm150)/L4440</i> | 73                 | 19.47±0.46           | 15.82                  | 19±0.6                 | 18.75                  | 1.17E-05              | -18.35                                     | 1.17E-05                        |                           |                              |
| <i>cep-1(gk138);isp-1(qm150)/cep-1</i> | 68                 | 20.24±0.43           | 20.40                  | 19±0.59                | 18.75                  | 5.54E-08              | -15.12                                     | 5.54E-08                        | 3.953                     | 3.91E-01                     |
| <i>cep-1(gk138);isp-1(qm150)/aak-2</i> | 47                 | 17.22±0.54           | 2.44                   | 17±0.81                | 6.25                   | 4.88E-01              | -27.76                                     | 4.88E-01                        | -11.530                   | 1.10E-03                     |
| <i>ceh-23(ms23);isp-1(qm150)/L4440</i> | 61                 | 19.12±0.63           | 13.74                  | 18±0.63                | 12.50                  | 4.05E-04              | -19.80                                     | 4.05E-04                        |                           |                              |
| <i>ceh-23(ms23);isp-1(qm150)/cep-1</i> | 79                 | 19.01±0.47           | 13.09                  | 18±0.51                | 12.50                  | 1.69E-04              | -20.25                                     | 1.69E-04                        | -5.565                    | 5.35E-01                     |
| <i>ceh-23(ms23);isp-1(qm150)/aak-2</i> | 69                 | 17.33±0.41           | 3.09                   | 16±0.55                | 0.00                   | 2.61E-01              | -27.29                                     | 2.61E-01                        | -9.348                    | 6.34E-03                     |

## C.2

## LS52

| Strain/treatment                | N (post censoring) | mean LS ± SEM (days) | % change to wt/control | median LS ± SEM (days) | % change to wt/control | P-value vs wt/control | % change to isp-1/control (mean) | P-value vs isp-1/control | % change to L4440 | P-value vs control |
|---------------------------------|--------------------|----------------------|------------------------|------------------------|------------------------|-----------------------|----------------------------------|--------------------------|-------------------|--------------------|
| N2/L4440                        | 91                 | 18.17±0.43           |                        | 18±0.71                |                        |                       | -31.71                           | 9.96E-27                 |                   |                    |
| N2/cep-1                        | 97                 | 17.94±0.38           | -1.29                  | 18±0.61                | 0.00                   | 4.05E-01              | -32.59                           | 3.93E-30                 | -1.290            | 4.05E-01           |
| N2/aak-2                        | 88                 | 14.18±0.31           | -21.97                 | 14±0.39                | -22.22                 | 7.70E-13              | -46.72                           | 1.33E-46                 | -21.974           | 7.70E-13           |
| isp-1(qm150)/L4440              | 91                 | 26.61±0.49           | 46.43                  | 26±0.58                | 44.44                  | 9.96E-27              |                                  |                          |                   |                    |
| isp-1(qm150)/cep-1              | 87                 | 21.59±0.35           | 18.81                  | 22±0.49                | 22.22                  | 4.33E-07              | -18.86                           | 1.34E-13                 | -18.861           | 1.34E-13           |
| isp-1(qm150)/aak-2              | 85                 | 17.2±0.48            | -5.37                  | 16±0.73                | -11.11                 | 2.47E-01              | -35.38                           | 1.37E-28                 | -35.376           | 1.37E-28           |
| cep-1(gk138);isp-1(qm150)/L4440 | 78                 | 24.16±0.36           | 32.93                  | 23±0.38                | 27.78                  | 4.59E-19              | -9.22                            | 1.70E-05                 |                   |                    |
| cep-1(gk138);isp-1(qm150)/cep-1 | 85                 | 24.41±0.33           | 34.31                  | 25±0.48                | 38.89                  | 3.79E-22              | -8.28                            | 5.07E-05                 | 1.041             | 7.61E-01           |
| cep-1(gk138);isp-1(qm150)/aak-2 | 90                 | 19.17±0.5            | 5.51                   | 19±0.90                | 5.56                   | 1.44E-02              | -27.94                           | 5.72E-20                 | -20.626           | 7.53E-11           |
| ceh-23(ms23);isp-1(qm150)/L4440 | 101                | 20.49±0.36           | 12.76                  | 20±0.58                | 11.11                  | 3.91E-04              | -23.00                           | 4.33E-18                 |                   |                    |
| ceh-23(ms23);isp-1(qm150)/cep-1 | 87                 | 21.04±0.36           | 15.77                  | 20±0.58                | 11.11                  | 1.98E-05              | -20.94                           | 1.40E-15                 | 2.669             | 4.42E-01           |
| ceh-23(ms23);isp-1(qm150)/aak-2 | 101                | 17.48±0.38           | -3.80                  | 18±0.55                | 0.00                   | 1.07E-01              | -34.30                           | 8.12E-33                 | -14.682           | 2.79E-07           |

## C.3

## LS56

| Strain/treatment                         | N (post censoring) | mean LS ± SEM (days) | % change to N2 | median LS ± SEM (days) | % change to wt/control | P-value vs wt/control | % change to isp-1 (mean LS) | P-value vs isp-1 | % change to isp-1;aak-2 | P-value vs isp-1;aak-2 |
|------------------------------------------|--------------------|----------------------|----------------|------------------------|------------------------|-----------------------|-----------------------------|------------------|-------------------------|------------------------|
| N2                                       | 92                 | 17.11±0.24           |                | 16±0.37                |                        |                       | -19.59                      | 2.03E-12         | 2.75                    | 2.62E-01               |
| isp-1(qm150)                             | 83                 | 21.28±0.50           | 24.36          | 20±0.69                | 25.00                  | 2.03E-12              |                             |                  | 27.79                   | 7.25E-14               |
| isp-1(qm150);aak-2(ok524)                | 80                 | 16.65±0.27           | -2.68          | 16±0.32                | 0.00                   | 2.62E-01              | -21.75                      | 7.25E-14         |                         |                        |
| ceh-23(ms23);isp-1(qm150);aak-2(ok524) 1 | 78                 | 17.03±0.31           | -0.49          | 16±0.40                | 0.00                   | 9.29E-01              | -19.98                      | 2.12E-11         | 2.26                    | 3.09E-01               |
| ceh-23(ms23);isp-1(qm150);aak-2(ok524) 2 | 66                 | 17.00±0.35           | -0.64          | 16±0.47                | 0.00                   | 9.33E-01              | -20.10                      | 1.16E-10         | 2.10                    | 3.32E-01               |
| cep-1(gk138);isp-1(qm150);aak-2(ok524) 1 | 60                 | 17.07±0.35           | -0.25          | 16±0.55                | 0.00                   | 8.62E-01              | -19.79                      | 7.90E-10         | 2.50                    | 2.92E-01               |
| cep-1(gk138);isp-1(qm150);aak-2(ok524) 2 | 69                 | 17.13±0.29           | 0.13           | 18±0.35                | 12.50                  | 8.89E-01              | -19.49                      | 7.12E-11         | 2.89                    | 2.57E-01               |

## D. Requirement of CEH-23 and CEP-1 on longevity of the AAK-2 ca

## D.1

## LS53

| Strains              | N (post censoring) | mean LS ± SEM (days) | % change to WBM59 | median LS ± SEM (days) | % change to WBM59 | P-value vs WBM59 | P-value vs WBM60 |
|----------------------|--------------------|----------------------|-------------------|------------------------|-------------------|------------------|------------------|
| RFP control (WBM59)  | 109                | 16.08±0.39           |                   | 16±0.48                |                   |                  | 9.18E-12         |
| aak-2ca (WBM60)      | 107                | 20.56±0.46           | 27.86             | 20±0.77                | 25.00             | 9.18E-12         |                  |
| WBM59;ceh-23(ms23) 1 | 105                | 17.11±0.35           | 6.41              | 18±0.46                | 12.50             | 2.10E-01         | 3.99E-09         |
| WBM59;ceh-23(ms23) 2 | 105                | 17.2±0.4             | 6.97              | 16±0.53                | 0.00              | 5.70E-02         | 1.07E-07         |
| WBM60;ceh-23(ms23) 1 | 108                | 16.24±0.4            | 1.00              | 16±0.47                | 0.00              | 8.41E-01         | 7.18E-11         |
| WBM60;ceh-23(ms23) 2 | 110                | 16.94±0.43           | 5.35              | 16±0.42                | 0.00              | 2.52E-01         | 2.02E-08         |
| WBM60;cep-1(gk138) 1 | 107                | 19.65±0.36           | 22.20             | 20±0.65                | 25.00             | 1.92E-08         | 2.87E-02         |
| WBM60;cep-1(gk138) 2 | 104                | 19.34±0.35           | 20.27             | 18±0.54                | 12.50             | 1.92E-07         | 6.09E-03         |

## D.2

## LS54

| Strains              | N (post censoring) | mean LS ± SEM (days) | % change to WBM59 | median LS ± SEM (days) | % change to WBM59 | P-value vs WBM59 | P-value vs WBM60 |
|----------------------|--------------------|----------------------|-------------------|------------------------|-------------------|------------------|------------------|
| RFP control (WBM59)  | 106                | 16.63±0.35           |                   | 16±0.45                |                   |                  | 7.43E-15         |
| aak-2ca (WBM60)      | 120                | 22.55±0.59           | 35.60             | 22±1                   | 37.50             | 7.43E-15         |                  |
| WBM59;ceh-23(ms23) 1 | 107                | 16.54±0.38           | -0.54             | 16±0.48                | 0.00              | 9.11E-01         | 6.31E-15         |
| WBM59;ceh-23(ms23) 2 | 92                 | 17.66±0.45           | 6.19              | 18±0.48                | 12.50             | 7.11E-02         | 1.07E-09         |
| WBM60;ceh-23(ms23) 1 | 104                | 18.21±0.45           | 9.50              | 18±0.57                | 12.50             | 4.56E-03         | 9.83E-09         |
| WBM60;ceh-23(ms23) 2 | 117                | 17.19±0.43           | 3.37              | 18±0.46                | 12.50             | 2.32E-01         | 1.55E-11         |
| WBM60;cep-1(gk138) 1 | 98                 | 17.64±0.41           | 6.07              | 18±0.34                | 12.50             | 4.35E-02         | 1.50E-10         |
| WBM60;cep-1(gk138) 2 | 115                | 19.71±0.46           | 18.52             | 20±0.5                 | 25.00             | 3.74E-07         | 1.53E-04         |

E. Epistasis between *ceh-23*, *cep-1* and *crtc-1* on *isp-1(qm150)* longevity

| E.1                                                        |                    | LS57                 |                        |                        |                        |                       |                                          |                                  |                   |                    |
|------------------------------------------------------------|--------------------|----------------------|------------------------|------------------------|------------------------|-----------------------|------------------------------------------|----------------------------------|-------------------|--------------------|
| Strains                                                    | N (post censoring) | mean LS ± SEM (days) | % change to wt/control | median LS ± SEM (days) | % change to wt/control | P-value vs wt/control | % change to <i>isp-1</i> /control (mean) | P-value vs <i>isp-1</i> /control | % change to L4440 | P-value vs control |
| N2/L4440                                                   | 117                | 16.02±0.43           |                        | 16±0.54                |                        |                       | -23.42                                   | 2.07E-09                         |                   |                    |
| N2/ <i>ceh-23</i>                                          | 73                 | 15.86±0.47           | -0.96                  | 16±0.49                | 0.00                   | 4.39E-01              | -24.15                                   | 2.52E-09                         | -0.96             | 4.39E-01           |
| N2/ <i>cep-1</i>                                           | 107                | 14.80±0.36           | -7.58                  | 14±0.489               | -12.50                 | 5.64E-03              | -29.22                                   | 9.51E-15                         | -7.58             | 5.64E-03           |
| <i>crtc-1</i> CA/L4440                                     | 99                 | 17.57±0.35           | 9.68                   | 18±0.53                | 12.50                  | 1.56E-01              | -16.00                                   | 7.67E-07                         |                   |                    |
| <i>crtc-1</i> CA/ <i>ceh-23</i>                            | 98                 | 16.78±0.43           | 4.74                   | 16±0.66                | 0.00                   | 5.11E-01              | -19.79                                   | 7.46E-08                         | -4.51             | 5.02E-01           |
| <i>crtc-1</i> CA/ <i>cep-1</i>                             | 83                 | 16.80±0.45           | 4.86                   | 16±0.57                | 0.00                   | 5.97E-01              | -19.70                                   | 1.94E-07                         | -4.40             | 4.36E-01           |
| <i>isp-1(qm150)</i> /L4440                                 | 70                 | 20.91±0.67           | 30.57                  | 18±0.93                | 12.50                  | 2.07E-09              |                                          |                                  |                   |                    |
| <i>isp-1(qm150)</i> / <i>ceh-23</i>                        | 92                 | 18.5±0.42            | 15.50                  | 18±0.41                | 12.50                  | 4.52E-04              | -11.54                                   | 2.71E-04                         | -11.54            | 2.71E-04           |
| <i>isp-1(qm150)</i> / <i>cep-1</i>                         | 79                 | 16.99±0.55           | 6.06                   | 16±0.48                | 0.00                   | 1.03E-01              | -18.78                                   | 1.96E-05                         | -18.78            | 1.96E-05           |
| <i>isp-1(qm150)</i> ; <i>crtc-1</i> CA iso2/L4440          | 89                 | 18.63±0.56           | 16.31                  | 18±0.47                | 12.50                  | 2.19E-04              | -10.93                                   | 1.38E-02                         |                   |                    |
| <i>isp-1(qm150)</i> ; <i>crtc-1</i> CA iso2/ <i>ceh-23</i> | 88                 | 18.93±0.51           | 18.20                  | 18±0.42                | 12.50                  | 3.99E-05              | -9.48                                    | 1.13E-02                         | 1.62              | 8.76E-01           |
| <i>isp-1(qm150)</i> ; <i>crtc-1</i> CA iso2/ <i>cep-1</i>  | 63                 | 18.83±0.74           | 17.53                  | 18±0.86                | 12.50                  | 2.95E-04              | -9.99                                    | 4.53E-02                         | 1.05              | 7.72E-01           |
| <i>isp-1(qm150)</i> ; <i>crtc-1</i> CA iso1/L4440          | 45                 | 17.65±0.75           | 10.21                  | 16±0.95                | 0.00                   | 4.51E-02              | -15.60                                   | 6.05E-04                         |                   |                    |
| <i>isp-1(qm150)</i> ; <i>crtc-1</i> CA iso1/ <i>ceh-23</i> | 28                 | 20.29±1.048          | 26.65                  | 18±1.76                | 12.50                  | 8.56E-05              | -3.01                                    | 4.43E-01                         | 14.92             | 2.62E-02           |
| <i>isp-1(qm150)</i> ; <i>crtc-1</i> CA iso1/ <i>cep-1</i>  | 47                 | 19.12±0.82           | 19.37                  | 18±0.83                | 12.50                  | 4.72E-04              | -8.58                                    | 1.13E-01                         | 8.32              | 1.12E-01           |

| E.2                                                        |                    | LS60                 |                        |                        |                        |                       |                                          |                                  |                   |                    |
|------------------------------------------------------------|--------------------|----------------------|------------------------|------------------------|------------------------|-----------------------|------------------------------------------|----------------------------------|-------------------|--------------------|
| Strains                                                    | N (post censoring) | mean LS ± SEM (days) | % change to wt/control | median LS ± SEM (days) | % change to wt/control | P-value vs wt/control | % change to <i>isp-1</i> /control (mean) | P-value vs <i>isp-1</i> /control | % change to L4440 | P-value vs control |
| N2/L4440                                                   | 127                | 16.25± 0.38          |                        | 16± 0.74               |                        |                       | -32.70                                   | 9.03E-24                         |                   |                    |
| N2/ <i>ceh-23</i>                                          | 131                | 16.77± 0.40          | 3.19                   | 16± 0.71               | 0.00                   | 2.77E-01              | -30.55                                   | 3.72E-20                         | 3.19              | 2.77E-01           |
| N2/ <i>cep-1</i>                                           | 99                 | 17.45± 0.45          | 7.40                   | 18± 0.50               | 12.50                  | 7.02E-02              | -27.71                                   | 5.65E-17                         | 7.40              | 7.02E-02           |
| <i>crtc-1</i> CA/L4440                                     | 85                 | 20.56± 0.38          | 26.48                  | 20± 0.59               | 25.00                  | 5.34E-09              | -14.87                                   | 4.93E-08                         |                   |                    |
| <i>crtc-1</i> CA/ <i>ceh-23</i>                            | 71                 | 19.89± 0.43          | 22.37                  | 20± 0.65               | 25.00                  | 7.59E-06              | -17.64                                   | 3.43E-09                         | -3.25             | 2.59E-01           |
| <i>crtc-1</i> CA/ <i>cep-1</i>                             | 69                 | 19.38± 0.44          | 19.26                  | 20± 0.60               | 25.00                  | 1.00E-04              | -19.73                                   | 9.73E-11                         | -5.70             | 6.94E-02           |
| <i>isp-1(qm150)</i> /L4440                                 | 90                 | 24.15± 0.50          | 48.58                  | 24± 0.71               | 50.00                  | 9.03E-24              | 0.00                                     |                                  |                   |                    |
| <i>isp-1(qm150)</i> / <i>ceh-23</i>                        | 81                 | 20.74± 0.27          | 27.62                  | 20± 0.26               | 25.00                  | 2.80E-10              | -14.11                                   | 5.31E-09                         | -14.11            | 5.31E-09           |
| <i>isp-1(qm150)</i> / <i>cep-1</i>                         | 77                 | 20.93± 0.32          | 28.79                  | 20± 0.37               | 25.00                  | 9.45E-11              | -13.32                                   | 1.95E-07                         | -13.32            | 1.95E-07           |
| <i>isp-1(qm150)</i> ; <i>crtc-1</i> CA iso1/L4440          | 63                 | 21.15± 0.41          | 30.15                  | 20± 0.46               | 25.00                  | 6.06E-11              | -12.41                                   | 9.89E-06                         |                   |                    |
| <i>isp-1(qm150)</i> ; <i>crtc-1</i> CA iso1/ <i>ceh-23</i> | 77                 | 21.23± 0.36          | 30.63                  | 20± 0.35               | 25.00                  | 7.45E-12              | -12.08                                   | 4.37E-06                         | 0.37              | 9.67E-01           |
| <i>isp-1(qm150)</i> ; <i>crtc-1</i> CA iso1/ <i>cep-1</i>  | 81                 | 21.00± 0.33          | 29.23                  | 20± 0.50               | 25.00                  | 2.06E-11              | -13.02                                   | 3.06E-07                         | -0.70             | 5.54E-01           |
| <i>isp-1(qm150)</i> ; <i>crtc-1</i> CA iso2/L4440          | 74                 | 21.67± 0.41          | 33.34                  | 22± 0.42               | 37.50                  | 3.52E-13              | -10.26                                   | 1.31E-04                         |                   |                    |
| <i>isp-1(qm150)</i> ; <i>crtc-1</i> CA iso2/ <i>ceh-23</i> | 61                 | 21.12± 0.46          | 29.98                  | 20± 0.51               | 25.00                  | 9.60E-10              | -12.52                                   | 2.18E-05                         | -2.52             | 1.40E-03           |
| <i>isp-1(qm150)</i> ; <i>crtc-1</i> CA iso2/ <i>cep-1</i>  | 91                 | 22.28± 0.38          | 37.07                  | 22± 0.58               | 37.50                  | 3.14E-17              | -7.74                                    | 9.35E-04                         | 2.80              | 5.27E-04           |

| E.3                                                               |                    | LS61                 |                |                        |                |                       |                                    |                         |                                          |                                            |
|-------------------------------------------------------------------|--------------------|----------------------|----------------|------------------------|----------------|-----------------------|------------------------------------|-------------------------|------------------------------------------|--------------------------------------------|
| Strains                                                           | N (post censoring) | mean LS ± SEM (days) | % change to wt | median LS ± SEM (days) | % change to wt | P-value vs wt/control | % change to <i>isp-1</i> (mean LS) | P-value vs <i>isp-1</i> | % change to <i>isp-1</i> ; <i>crtc-1</i> | P-value vs <i>isp-1</i> ; <i>crtc-1</i> CA |
| N2                                                                | 93                 | 16.00± 0.29          |                | 16.00± 0.45            |                |                       | -28.54                             | 3.35E-24                | -19.48                                   | 1.24E-11                                   |
| <i>crtc-1</i> CA                                                  | 84                 | 16.93± 0.32          | 5.81           | 18.00± 0.37            | 12.50          | 3.58E-02              | -24.38                             | 6.73E-19                | -14.80                                   | 2.25E-07                                   |
| <i>isp-1(qm150)</i>                                               | 72                 | 22.39± 0.43          | 39.93          | 22.00± 0.39            | 37.50          | 3.35E-24              |                                    |                         | 12.68                                    | 1.63E-04                                   |
| <i>ceh-23(ms23)</i> ; <i>isp-1(qm150)</i>                         | 86                 | 20.20± 0.37          | 26.25          | 20.00± 0.53            | 25.00          | 8.68E-15              | -9.78                              | 3.06E-04                | 1.66                                     | 6.88E-01                                   |
| <i>cep-1(gk138)</i> ; <i>isp-1(qm150)</i>                         | 90                 | 20.69± 0.34          | 29.31          | 20.00± 0.39            | 25.00          | 1.01E-18              | -7.59                              | 2.18E-03                | 4.13                                     | 2.56E-01                                   |
| <i>isp-1(qm150)</i> ; <i>crtc-1</i> CA                            | 69                 | 19.87± 0.43          | 24.19          | 20.00± 0.58            | 25.00          | 1.24E-11              | -11.25                             | 1.63E-04                |                                          |                                            |
| <i>cep-1(gk138)</i> ; <i>isp-1(qm150)</i> ; <i>crtc-1</i> CA iso1 | 68                 | 20.38± 0.47          | 27.38          | 20.00± 0.51            | 25.00          | 1.52E-12              | -8.97                              | 3.72E-03                | 2.57                                     | 3.91E-01                                   |
| <i>cep-1(gk138)</i> ; <i>isp-1(qm150)</i> ; <i>crtc-1</i> CA iso2 | 88                 | 20.93± 0.40          | 30.81          | 20.00± 0.60            | 25.00          | 3.20E-18              | -6.52                              | 1.87E-02                | 5.33                                     | 9.76E-02                                   |
| <i>ceh-23(ms23)</i> ; <i>isp-1(qm150)</i> ; <i>crtc-1</i> CA      | 78                 | 20.68± 0.41          | 29.25          | 20.00± 0.43            | 25.00          | 4.09E-16              | -7.63                              | 1.07E-02                | 4.08                                     | 2.25E-01                                   |
| <i>aak-2 ca</i> (WBM60)                                           | 107                | 20.37± 0.40          | 27.31          | 20.00± 0.34            | 25.00          | 2.73E-16              | -9.02                              | 2.40E-03                | 2.52                                     | 3.13E-01                                   |
| WBM60; <i>crtc-1</i> CA                                           | 87                 | 18.22± 0.30          | 13.88          | 18.00± 0.54            | 12.50          | 1.46E-06              | -18.62                             | 3.38E-12                | -8.30                                    | 1.59E-03                                   |

pooled data

Figure 1A

| Strain                                        | N (post censoring) | mean LS ± SEM (days) | % change to wt | median LS ± SEM (days) | % change to wt | P-value vs wt | P-value vs <i>ceh-23;isp-1</i> | P-value vs <i>cep-1;isp-1</i> |
|-----------------------------------------------|--------------------|----------------------|----------------|------------------------|----------------|---------------|--------------------------------|-------------------------------|
| WT(N2)                                        | 404                | 17.611±0.161         |                | 18±0.2                 |                |               | 1.48E-86                       | 2.19E-95                      |
| <i>isp-1(qm150)</i>                           | 333                | 27.668±0.246         | 57.11          | 28±0.26                | 55.56          | 4.26E-136     | 4.39E-37                       | 5.05E-25                      |
| <i>ceh-23(ms23);isp-1(qm150)</i>              | 410                | 23.479±0.203         | 33.32          | 24±0.28                | 33.33          | 1.48E-86      |                                | 3.91E-03                      |
| <i>cep-1(gk138);isp-1(qm150)</i>              | 339                | 24.329±0.221         | 38.15          | 24±0.27                | 33.33          | 2.19E-95      | 3.91E-03                       |                               |
| <i>cep-1(gk138);ceh-23(ms23);isp-1(qm150)</i> | 560                | 24.379±0.155         | 38.43          | 24±0.25                | 33.33          | 6.59E-137     | 2.52E-03                       | 5.29E-01                      |

Figure 1B

| Strain                           | N (post censoring) | mean LS ± SEM (days) | % change to wt | median LS ± SEM (days) | % change to wt | P-value vs wt | P-value vs <i>nuo-6(qm200)</i> |
|----------------------------------|--------------------|----------------------|----------------|------------------------|----------------|---------------|--------------------------------|
| WT(N2)                           | 188                | 16.05±0.24           |                | 16±0.28                |                |               | 7.04E-30                       |
| <i>nuo-6(qm200)</i>              | 143                | 21.59±0.43           | 34.51          | 22±0.52                | 37.50          | 7.04E-30      |                                |
| <i>nuo-6(qm200) cep-1(gk138)</i> | 275                | 17.09±0.3            | 6.46           | 16±0.45                | 0.00           | 2.22E-04      | 6.75E-14                       |
| <i>nuo-6(qm200);ceh-23(ms23)</i> | 90                 | 17.95±0.68           | 11.80          | 18±1.15                | 12.50          | 2.11E-05      | 1.02E-03                       |

Figure 1C and D

| Strain                          | N (post censoring) | mean LS ± SEM (days) | % change to wt | median LS ± SEM (days) | % change to wt | P-value vs wt | P-value vs <i>mev-1(kn1)</i> | P-value vs <i>gas-1(fc21)</i> |
|---------------------------------|--------------------|----------------------|----------------|------------------------|----------------|---------------|------------------------------|-------------------------------|
| WT(N2)                          | 513                | 16.97±0.15           |                | 16±0.24                |                |               | 1.77E-07                     | 3.44E-15                      |
| <i>mev-1(kn1)</i>               | 215                | 13.96±0.26           | -17.71         | 14±0.29                | -12.50         | 1.77E-07      |                              |                               |
| <i>cep-1(gk138);mev-1(kn1)</i>  | 194                | 18.94±0.35           | 11.65          | 18±0.52                | 12.50          | 1.35E-07      | 4.98E-04                     |                               |
| <i>ceh-23(ms23) mev-1(kn1)</i>  | 496                | 17.97±0.24           | 5.92           | 18±0.28                | 12.50          | 1.48E-02      | 1.79E-17                     |                               |
| <i>gas-1(fc21)</i>              | 280                | 12.78±0.19           | -24.67         | 12±0.23                | -25.00         | 3.44E-15      |                              |                               |
| <i>cep-1(gk138);gas-1(fc21)</i> | 273                | 17.97±0.35           | 5.91           | 18±0.52                | 12.50          | 2.04E-07      |                              | 8.07E-07                      |
| <i>ceh-23(ms23);gas-1(fc21)</i> | 456                | 16.15±0.24           | -4.84          | 16±0.36                | 0.00           | 9.97E-01      |                              | 2.02E-07                      |

Figure 4D and E

| Strain/RNAi treatment                  | N (post censoring) | mean LS ± SEM (days) | % change to wt/control | median LS ± SEM (days) | % change to wt/control | P-value vs wt/control | P-value vs <i>isp-1/control</i> | P-value vs L4440 |
|----------------------------------------|--------------------|----------------------|------------------------|------------------------|------------------------|-----------------------|---------------------------------|------------------|
| N2/L4440                               | 203                | 17.49±0.28           |                        | 16±0.48                |                        |                       | 4.89E-40                        |                  |
| N2/aak-2                               | 185                | 14.33±0.24           | -18.07                 | 14±0.35                | -12.50                 | 8.28E-17              | 1.60E-58                        | 8.28E-17         |
| <i>isp-1(qm150)/L4440</i>              | 162                | 26.04±0.46           | 48.89                  | 26±0.57                | 62.50                  | 4.89E-40              |                                 |                  |
| <i>isp-1(qm150)/aak-2</i>              | 198                | 16.38±0.41           | -6.35                  | 16±0.54                | 0.00                   | 2.56E-01              | 4.57E-36                        | 4.57E-36         |
| <i>cep-1(gk138);isp-1(qm150)/L4440</i> | 204                | 21.93±0.34           | 25.39                  | 23±0.46                | 43.75                  | 1.92E-21              | 1.73E-12                        |                  |
| <i>cep-1(gk138);isp-1(qm150)/aak-2</i> | 175                | 18.51±0.39           | 5.83                   | 19±0.69                | 18.75                  | 2.78E-03              | 2.78E-28                        | 6.92E-10         |
| <i>ceh-23(ms23);isp-1(qm150)/L4440</i> | 199                | 19.98±0.33           | 14.24                  | 20±0.51                | 25.00                  | 2.70E-08              | 2.67E-21                        |                  |
| <i>ceh-23(ms23);isp-1(qm150)/aak-2</i> | 216                | 17.45±0.28           | -0.23                  | 18±0.38                | 12.50                  | 7.86E-01              | 1.33E-39                        | 9.34E-09         |

Figure 5B

| Strains                    | N (post censoring) | mean LS ± SEM (days) | % change to WBM59 | median LS ± SEM (days) | % change to WBM59 | P-value vs WBM59 | P-value vs WBM60 |
|----------------------------|--------------------|----------------------|-------------------|------------------------|-------------------|------------------|------------------|
| RFP control (WBM59)        | 215                | 16.34±0.27           |                   | 16±0.33                |                   |                  | 8.33E-26         |
| <i>aak-2 ca</i> (WBM60)    | 227                | 21.53±0.38           | 31.76             | 22±0.76                | 37.50             | 8.33E-26         |                  |
| WBM59; <i>ceh-23(ms23)</i> | 409                | 17.12±0.2            | 4.77              | 16±0.26                | 0.00              | 2.55E-02         | 1.10E-25         |
| WBM60; <i>ceh-23(ms23)</i> | 439                | 17.15±0.22           | 4.96              | 16±0.27                | 0.00              | 1.77E-02         | 1.03E-22         |
| WBM60; <i>cep-1(gk138)</i> | 424                | 19.15±0.2            | 17.20             | 18±0.24                | 12.50             | 1.08E-14         | 1.10E-09         |

Figure 6B and C

| Strains                | N (post censoring) | mean LS ± SEM (days) | % change to wt/control | median LS ± SEM (days) | % change to wt/control | P-value vs wt/control | % change to <i>isp-1/control</i> (mean) | P-value vs <i>isp-1/control</i> | % change to L4440 | P-value vs control |
|------------------------|--------------------|----------------------|------------------------|------------------------|------------------------|-----------------------|-----------------------------------------|---------------------------------|-------------------|--------------------|
| N2/L4440               | 244                | 16.14±0.28           |                        | 16±0.44                |                        |                       | -29.16                                  | 1.50E-30                        |                   |                    |
| N2/ <i>ceh-23</i>      | 204                | 16.44±0.31           | 1.88                   | 16±0.43                | 0.00                   | 5.56E-01              | -27.82                                  | 2.56E-27                        | 1.88              | 5.56E-01           |
| N2/ <i>cep-1</i>       | 206                | 16.08±0.30           | -0.34                  | 16±0.57                | 0.00                   | 6.76E-01              | -29.40                                  | 9.56E-31                        | -0.34             | 6.76E-01           |
| <i>crtc-1 CA/L4440</i> | 184                | 18.96±0.28           | 17.48                  | 18±0.41                | 12.50                  | 9.08E-08              | -16.78                                  | 7.16E-15                        |                   |                    |

|                                           |     |            |       |         |       |          |        |          |        |          |
|-------------------------------------------|-----|------------|-------|---------|-------|----------|--------|----------|--------|----------|
| <i>crtc-1 CA/ceh-23</i>                   | 169 | 18.10±0.33 | 12.13 | 18±0.50 | 12.50 | 3.97E-04 | -20.56 | 1.65E-17 | -4.55  | 1.38E-01 |
| <i>crtc-1 CA/cep-1</i>                    | 152 | 18.00±0.33 | 11.56 | 18±0.40 | 12.50 | 1.38E-03 | -20.97 | 7.87E-18 | -5.04  | 6.29E-02 |
| <i>isp-1(qm150)/L4440</i>                 | 160 | 22.78±0.42 | 41.16 | 22±0.48 | 37.50 | 1.50E-30 |        |          |        |          |
| <i>isp-1(qm150)/ceh-23</i>                | 173 | 19.59±0.27 | 21.40 | 20±0.33 | 25.00 | 1.64E-11 | -13.99 | 6.19E-12 | -13.99 | 6.19E-12 |
| <i>isp-1(qm150)/cep-1</i>                 | 156 | 19.09±0.35 | 18.28 | 18±0.47 | 12.50 | 4.42E-09 | -16.20 | 3.73E-11 | -16.20 | 3.73E-11 |
| <i>isp-1(qm150);crtc-1 CA iso1/L4440</i>  | 152 | 19.79±0.37 | 22.63 | 18±0.43 | 12.50 | 1.07E-12 | -13.13 | 1.84E-07 |        |          |
| <i>isp-1(qm150);crtc-1 CA iso1/ceh-23</i> | 165 | 20.06±0.33 | 24.27 | 20±0.35 | 25.00 | 1.32E-14 | -11.96 | 9.40E-08 | 1.34   | 8.77E-01 |
| <i>isp-1(qm150);crtc-1 CA iso1/cep-1</i>  | 144 | 20.20±0.37 | 25.15 | 20±0.51 | 25.00 | 1.89E-14 | -11.34 | 1.91E-06 | 2.06   | 5.81E-01 |
| <i>isp-1(qm150);crtc-1 CA iso2/L4440</i>  | 119 | 20.32±0.41 | 25.92 | 20±0.46 | 25.00 | 3.02E-13 | -10.79 | 1.31E-05 |        |          |
| <i>isp-1(qm150);crtc-1 CA iso2/ceh-23</i> | 89  | 20.92±0.45 | 29.59 | 20±0.56 | 25.00 | 1.14E-13 | -8.19  | 9.24E-04 | 2.92   | 4.47E-01 |
| <i>isp-1(qm150);crtc-1 CA iso2/cep-1</i>  | 138 | 21.24±0.39 | 31.61 | 22±0.49 | 37.50 | 1.10E-19 | -6.76  | 1.83E-03 | 4.52   | 1.09E-01 |

Figure S2A

| Strain                           | N (post censoring) | mean LS ± SEM (days) | % change to wt | median LS ± SEM (days) | % change to wt | P-value vs wt |
|----------------------------------|--------------------|----------------------|----------------|------------------------|----------------|---------------|
| WT(N2)                           | 83                 | 15.73±0.41           |                | 16±0.51                |                |               |
| <i>ceh-23(ms23)</i>              | 113                | 16.74±0.34           | 6.451898114    | 16±0.33                | .000           | 1.18E-01      |
| <i>cep-1(gk138)</i>              | 97                 | 16.68±0.41           | 6.051668118    | 16±0.48                | .000           | 1.30E-01      |
| <i>cep-1(gk138);ceh-23(ms23)</i> | 93                 | 16.58±0.37           | 5.417362515    | 16±0.36                | .000           | 2.33E-01      |

Figure S2B

| Strain                   | N (post censoring) | mean LS ± SEM (days) | % change to wt | median LS ± SEM (days) | % change to EV control | P-value vs EV control |
|--------------------------|--------------------|----------------------|----------------|------------------------|------------------------|-----------------------|
| wt/EV                    | 66                 | 17.18±0.434          |                | 18±0.69                |                        |                       |
| wt/ <i>aak-2</i>         | 73                 | 15.51±0.374          | -11.8214105    | 16±0.45                | -11.8                  | 1.57E-04              |
| <i>mev-1(kn1)/EV</i>     | 57                 | 12.63±0.407          | -26.4898731    | 12±0.74                |                        |                       |
| <i>mev-1(kn1)/aak-2</i>  | 58                 | 12.06±0.340          | -29.8193654    | 12±0.62                | -4.53                  | 1.31E-01              |
| <i>gas-1(fc21)/EV</i>    | 54                 | 13.15±0.341          | -23.4763864    | 14±0.42                |                        |                       |
| <i>gas-1(fc21)/aak-2</i> | 59                 | 12.10±0.284          | -29.5668855    | 12±0.40                | -8                     | 1.80E-02              |

Figure S3A and S3B

| Strains                                          | N (post censoring) | mean LS ± SEM (days) | % change to wt | median LS ± SEM (days) | P-value vs wt/control | % change to <i>isp-1/control</i> | P-value vs <i>isp-1/control</i> | % change to <i>wildtype crtc-</i> | P-value vs <i>wildtype</i> |
|--------------------------------------------------|--------------------|----------------------|----------------|------------------------|-----------------------|----------------------------------|---------------------------------|-----------------------------------|----------------------------|
| wildtype                                         | 112                | 16.00±0.30           |                | 16±0.45                |                       | -28.54                           | 3.35E-24                        |                                   |                            |
| <i>crtc-1 CA</i>                                 | 105                | 16.93±0.32           | 5.80           | 18±0.37                | 3.58E-02              | -24.39                           | 6.73E-19                        | 5.80                              | 3.58E-02                   |
| <i>isp-1(qm150)</i>                              | 122                | 22.40±0.43           | 39.93          | 22±0.39                | 3.35E-24              |                                  |                                 |                                   |                            |
| <i>ceh-23(ms23);isp-1(qm150)</i>                 | 114                | 20.20±0.37           | 26.26          | 20±0.53                | 8.68E-15              | -9.77                            | 3.06E-04                        |                                   |                            |
| <i>cep-1(gk138);isp-1(qm150)</i>                 | 112                | 20.69±0.34           | 29.31          | 20±0.39                | 1.01E-18              | -7.59                            | 2.18E-03                        |                                   |                            |
| <i>isp-1(qm150);crtc-1 CA</i>                    | 104                | 19.88±0.73           | 24.22          | 20±0.58                | 1.24E-11              | -11.23                           | 1.63E-04                        | -11.23                            | 1.63E-04                   |
| <i>cep-1(gk138);isp-1(qm150);crtc-1 CA iso 1</i> | 100                | 20.38±0.47           | 27.39          | 20±0.51                | 1.52E-12              | -8.96                            | 3.72E-03                        | -1.48                             | 9.07E-01                   |
| <i>cep-1(gk138);isp-1(qm150);crtc-1 CA iso 2</i> | 133                | 20.93±0.40           | 30.82          | 20±0.61                | 3.20E-18              | -6.51                            | 1.87E-02                        | 1.17                              | 4.40E-01                   |
| <i>ceh-23(ms23);isp-1(qm150);crtc-1 CA</i>       | 105                | 20.68±0.41           | 29.25          | 20±0.43                | 4.09E-16              | -7.64                            | 1.07E-02                        | 2.36                              | 4.63E-01                   |
