# Supplementary material for: Transcription factors CEP‐1/p53 and CEH‐23 collaborate with AAK‐2/AMPK to modulate longevity in Caenorhabditis elegans
Source: PubMed Central journal article supplement (PMC5506430; doi:10.1111/acel.12619), 2017-05-30
Supplement: ACEL-16-814-s005.pdf [file ACEL-16-814-s005.pdf]

Table S2: Genes differentially expressed between *isp-1(qm150)* and *ceh-23(ms23);isp-1(qm150)* (identified by 1 class SAM with FDR=0.59, 1.5 fold gene cutoff)

A. CEH-23 activating genes

| Gene ID        | public name | seq name   | Score(d)    | Numerator(r) | Denominator(s+s0) | q-value(%)  |
|----------------|-------------|------------|-------------|--------------|-------------------|-------------|
| WBGene00013297 |             | Y57G11B.5  | 4.780825373 | 2.8325       | 0.592470919       | 0.312483699 |
| WBGene00000388 | cdc-25.3    | ZK637.11   | 4.143042469 | 2.7575       | 0.665573675       | 0.312483699 |
| WBGene00015899 |             | C17E7.4    | 4.167841413 | 2.705        | 0.649017017       | 0.312483699 |
| WBGene00008822 |             | F14H3.3    | 4.299866478 | 2.685        | 0.624437994       | 0.312483699 |
| WBGene00012405 | ztf-25      | Y6G8.3     | 4.087441357 | 2.5975       | 0.635483123       | 0.345525782 |
| A_12_P159890   |             |            | 4.450922521 | 2.595        | 0.583025202       | 0.312483699 |
| WBGene00015905 |             | C17E7.12   | 4.130818491 | 2.5875       | 0.626389178       | 0.345525782 |
| WBGene00022722 |             | ZK370.8    | 20.32009787 | 2.5875       | 0.127336985       | 0           |
| WBGene00013393 |             | Y62H9A.5   | 4.937047465 | 2.525        | 0.51143928        | 0.312483699 |
| WBGene00015683 |             | C10G8.4    | 3.810701538 | 2.51         | 0.658671369       | 0.345525782 |
| WBGene00008825 |             | F14H3.6    | 4.197952033 | 2.4775       | 0.590168725       | 0.312483699 |
| WBGene00045184 |             | T23F6.7    | 4.140936743 | 2.475        | 0.59769085        | 0.345525782 |
| WBGene00007315 |             | C04H5.7    | 5.215052865 | 2.465        | 0.472670185       | 0.312483699 |
| WBGene00016824 |             | C50E3.13   | 3.999074588 | 2.45         | 0.612641737       | 0.345525782 |
| WBGene00004821 | skr-15      | F54D10.1   | 5.54349233  | 2.44         | 0.440155746       | 0.312483699 |
| WBGene00013391 |             | Y62H9A.3   | 5.145493978 | 2.42         | 0.470314417       | 0.312483699 |
| WBGene00010555 |             | K04C1.5    | 4.813999488 | 2.4          | 0.498545961       | 0.312483699 |
| WBGene00013931 | clec-97     | ZK39.6     | 4.311281375 | 2.4          | 0.556679045       | 0.312483699 |
| WBGene00006927 | vit-3       | F59D8.1    | 4.445880598 | 2.3875       | 0.537013972       | 0.312483699 |
| WBGene00008789 |             | F14D7.2    | 4.319380748 | 2.3675       | 0.548110977       | 0.312483699 |
| WBGene00021263 |             | Y22D7AR.10 | 3.795872833 | 2.3275       | 0.613165957       | 0.345525782 |
| WBGene00007283 | clec-222    | C03E10.6   | 4.932371419 | 2.325        | 0.471375694       | 0.312483699 |
| WBGene00016823 |             | C50E3.12   | 4.186541579 | 2.32         | 0.554156684       | 0.312483699 |
| WBGene00015180 |             | B0416.4    | 4.665406699 | 2.2975       | 0.492454388       | 0.312483699 |
| A_12_P175764   |             |            | 4.052164053 | 2.2925       | 0.565747085       | 0.345525782 |
| WBGene00017712 |             | F22E5.17   | 4.431983426 | 2.29         | 0.516698683       | 0.312483699 |
| WBGene00011741 |             | T12G3.6    | 3.446623899 | 2.2875       | 0.663692955       | 0.414186921 |
| WBGene00013392 |             | Y62H9A.4   | 4.680960254 | 2.2875       | 0.488681782       | 0.312483699 |
| WBGene00010492 | meg-1       | K02B9.1    | 4.33369685  | 2.285        | 0.527263461       | 0.312483699 |
| WBGene00021730 |             | Y49F6C.8   | 4.059429906 | 2.285        | 0.562886921       | 0.345525782 |
| WBGene00010085 |             | F55B11.3   | 5.332204717 | 2.28         | 0.427590485       | 0.312483699 |
| WBGene00018808 |             | F54D10.7   | 4.43638407  | 2.2725       | 0.512241493       | 0.312483699 |
| WBGene00007459 |             | C08F11.12  | 4.9179544   | 2.27         | 0.461574024       | 0.312483699 |
| WBGene00045268 | ttr-42      | H01M10.3   | 5.055669509 | 2.2625       | 0.447517385       | 0.312483699 |
| WBGene00017263 |             | F08F3.6    | 3.969832286 | 2.25         | 0.566774573       | 0.345525782 |
| WBGene00013394 |             | Y62H9A.6   | 5.318587446 | 2.24         | 0.421164458       | 0.312483699 |
| WBGene00008377 |             | D1054.10   | 4.884638541 | 2.235        | 0.457556886       | 0.312483699 |
| WBGene00012878 |             | Y45F10C.2  | 4.797754259 | 2.235        | 0.465842951       | 0.312483699 |
| WBGene00019905 |             | R05G9.3    | 4.216542458 | 2.2325       | 0.529462236       | 0.312483699 |
| WBGene00045261 |             | H29C22.1   | 5.122282994 | 2.23         | 0.435352752       | 0.312483699 |
| WBGene00017177 |             | F02E8.4    | 3.904466836 | 2.215        | 0.567298966       | 0.345525782 |
| WBGene00022821 |             | ZK813.2    | 4.142201732 | 2.2125       | 0.534136226       | 0.312483699 |
| WBGene00011011 |             | R04D3.3    | 4.201912582 | 2.205        | 0.524761036       | 0.312483699 |
| WBGene00006925 | vit-1       | K09F5.2    | 4.092462083 | 2.2          | 0.537573704       | 0.345525782 |
| WBGene00006926 | vit-2       | C42D8.2    | 3.882107928 | 2.18         | 0.561550591       | 0.345525782 |
| WBGene00008378 |             | D1054.11   | 4.594487005 | 2.18         | 0.474481699       | 0.312483699 |
| WBGene00016084 | cht-3       | C25A8.4    | 4.054744411 | 2.165        | 0.533942409       | 0.345525782 |
| WBGene00008535 |             | F02H6.2    | 3.505492194 | 2.1575       | 0.615462788       | 0.414186921 |
| WBGene00013867 |             | ZC373.2    | 4.342360496 | 2.155        | 0.496273859       | 0.312483699 |
| WBGene00006930 | vit-6       | K07H8.6    | 4.145916028 | 2.15         | 0.518582621       | 0.312483699 |
| WBGene00045473 |             | F30A10.14  | 4.449314881 | 2.1475       | 0.482658579       | 0.312483699 |
| WBGene00022586 |             | ZC308.4    | 3.960777095 | 2.1425       | 0.540929204       | 0.345525782 |
| WBGene00009606 |             | F40G12.11  | 3.713378656 | 2.14         | 0.576294582       | 0.345525782 |
| WBGene00008536 |             | F02H6.3    | 3.601902278 | 2.1375       | 0.593436422       | 0.414186921 |
| WBGene00010084 |             | F55B11.2   | 4.811535546 | 2.1375       | 0.444244874       | 0.312483699 |
| WBGene00009897 |             | F49E12.1   | 4.741444923 | 2.125        | 0.448175616       | 0.312483699 |
| WBGene00010613 |             | K07A1.6    | 5.371709907 | 2.12         | 0.39466018        | 0.312483699 |
| WBGene00012557 |             | Y37D8A.19  | 4.767699167 | 2.1175       | 0.444134566       | 0.312483699 |
| WBGene00012212 |             | W02D9.6    | 5.857696038 | 2.1025       | 0.358929515       | 0.300971142 |
| WBGene00006929 | vit-5       | C04F6.1    | 4.247653635 | 2.0975       | 0.493802033       | 0.312483699 |
| WBGene00017402 |             | F12E12.1   | 3.978871604 | 2.0925       | 0.525902871       | 0.345525782 |
| WBGene00010000 |             | F53F8.3    | 4.2638256   | 2.08         | 0.48782483        | 0.312483699 |
| WBGene00008113 |             | C46C2.5    | 4.745881324 | 2.0775       | 0.437747988       | 0.312483699 |
| WBGene00019989 |             | R09F10.8   | 3.910027844 | 2.075        | 0.530686758       | 0.345525782 |
| WBGene00004241 | puf-5       | F54C9.8    | 4.78607434  | 2.0725       | 0.433027123       | 0.312483699 |

|                |          |             |             |        |             |             |
|----------------|----------|-------------|-------------|--------|-------------|-------------|
| WBGene00017843 |          | F26G5.1     | 5.305625709 | 2.0675 | 0.389680711 | 0.312483699 |
| WBGene00008393 |          | D1086.6     | 4.688790299 | 2.065  | 0.440412104 | 0.312483699 |
| WBGene00010196 |          | F57C2.4     | 4.922372281 | 2.0625 | 0.419005285 | 0.312483699 |
| WBGene00011012 |          | R04D3.4     | 3.496271924 | 2.0625 | 0.58991407  | 0.414186921 |
| WBGene00017541 |          | F17E9.4     | 4.230804719 | 2.0625 | 0.487495911 | 0.312483699 |
| WBGene00044080 |          | D1086.10    | 4.713986752 | 2.0525 | 0.4354064   | 0.312483699 |
| WBGene00045239 |          | Y49E10.29   | 5.18589675  | 2.0525 | 0.395784972 | 0.312483699 |
| WBGene00044535 |          | K11D12.13   | 4.620537456 | 2.0375 | 0.440966017 | 0.312483699 |
| WBGene00006928 | vit-4    | F59D8.2     | 3.969120129 | 2.0275 | 0.510818502 | 0.345525782 |
| WBGene00045038 |          | F13G11.3    | 4.222793005 | 2.0175 | 0.477764361 | 0.312483699 |
| WBGene00011000 |          | R03G8.6     | 6.568061184 | 2.015  | 0.306787642 | 0.300971142 |
| WBGene00012213 |          | W02D9.7     | 5.311219253 | 2.0025 | 0.377032072 | 0.312483699 |
| WBGene00004078 | pos-1    | F52E1.1     | 4.235714641 | 1.9925 | 0.470404682 | 0.312483699 |
| WBGene00045061 |          | Y57G11B.8   | 4.649550659 | 1.9875 | 0.427460661 | 0.312483699 |
| WBGene00006619 | try-1    | ZK546.15    | 3.574259185 | 1.985  | 0.555359837 | 0.414186921 |
| WBGene00044773 |          | C08A9.10    | 4.321767136 | 1.9825 | 0.458724392 | 0.312483699 |
| WBGene00045394 |          | ZK813.7     | 5.312990982 | 1.98   | 0.37267144  | 0.312483699 |
| WBGene00021988 | rgs-8.2  | Y59E1A.2    | 5.408414494 | 1.9775 | 0.365633958 | 0.312483699 |
| WBGene00004352 | rgs-9    | ZC53.7      | 4.566643327 | 1.975  | 0.432483962 | 0.312483699 |
| WBGene00006541 | tbh-1    | H13N06.6    | 3.368533858 | 1.95   | 0.578886864 | 0.463367002 |
| WBGene00045265 |          | K10C2.8     | 4.467293757 | 1.945  | 0.435386636 | 0.312483699 |
| WBGene00021136 |          | W10G11.3    | 3.972652452 | 1.94   | 0.488338717 | 0.345525782 |
| WBGene00016303 | fbxc-32  | C32B5.10    | 3.877108882 | 1.9375 | 0.499728034 | 0.345525782 |
| WBGene00008912 |          | F17C8.7     | 3.24342461  | 1.935  | 0.596591638 | 0.463367002 |
| WBGene00019153 |          | H04M03.3    | 4.257042639 | 1.935  | 0.454540902 | 0.312483699 |
| WBGene00019622 |          | K10C2.7     | 3.819295836 | 1.935  | 0.506637894 | 0.345525782 |
| WBGene00050914 |          | T12B5.15    | 4.254392914 | 1.93   | 0.453648744 | 0.312483699 |
| WBGene00044081 |          | D1086.11    | 4.699786629 | 1.925  | 0.409593063 | 0.312483699 |
| WBGene00012672 |          | Y39B6A.10   | 4.082612158 | 1.9225 | 0.470899494 | 0.345525782 |
| WBGene00012880 |          | Y45F10C.4   | 3.880352482 | 1.915  | 0.493511868 | 0.345525782 |
| WBGene00016822 |          | C50E3.11    | 4.833197635 | 1.915  | 0.396218021 | 0.312483699 |
| WBGene00021005 |          | W03F11.1    | 3.387891142 | 1.9125 | 0.564510464 | 0.463367002 |
| WBGene00020218 |          | T04G9.7     | 3.938086777 | 1.91   | 0.485007088 | 0.345525782 |
| WBGene00003539 | nas-20   | T11F9.3     | 4.102246583 | 1.905  | 0.464379691 | 0.345525782 |
| WBGene00004374 | rme-2    | T11F8.3     | 4.01551223  | 1.905  | 0.47441021  | 0.345525782 |
| WBGene00011431 |          | T04D3.1     | 4.610170642 | 1.905  | 0.413216809 | 0.312483699 |
| WBGene00017105 |          | E02H9.7     | 4.379058153 | 1.905  | 0.435025052 | 0.312483699 |
| WBGene00017134 |          | EEED8.3     | 3.954354546 | 1.9    | 0.480482966 | 0.345525782 |
| WBGene00007225 |          | C01G6.3     | 3.959387942 | 1.8975 | 0.479240738 | 0.345525782 |
| WBGene00020290 |          | T06D4.1     | 3.707149797 | 1.8975 | 0.511848753 | 0.345525782 |
| WBGene00003987 | pes-23   | F14B8.3     | 4.745992892 | 1.8925 | 0.398757445 | 0.312483699 |
| WBGene00010065 |          | F54F7.3     | 5.625611924 | 1.8925 | 0.336407848 | 0.312483699 |
| WBGene00015912 | fbxc-50  | C17F4.5     | 4.166767355 | 1.8875 | 0.452989053 | 0.312483699 |
| WBGene00001569 | gei-12   | F52D2.4     | 4.893150625 | 1.88   | 0.384210531 | 0.312483699 |
| WBGene00000597 | col-8    | F11H8.3     | 3.272494428 | 1.875  | 0.572957431 | 0.463367002 |
| WBGene00015102 | cpg-2    | B0280.5     | 4.069166513 | 1.875  | 0.460782323 | 0.345525782 |
| WBGene00009659 |          | F43G6.7     | 3.764778445 | 1.865  | 0.495381077 | 0.345525782 |
| WBGene00018446 | ceh-83   | F45C12.15   | 4.145277849 | 1.8625 | 0.449306432 | 0.312483699 |
| WBGene00007458 |          | C08F11.11   | 4.245634022 | 1.855  | 0.436919431 | 0.312483699 |
| WBGene00007196 |          | B0513.4     | 3.871086179 | 1.845  | 0.476610417 | 0.345525782 |
| WBGene00021153 |          | Y4C6A.3     | 4.216183592 | 1.8425 | 0.437006587 | 0.312483699 |
| WBGene00016638 | perm-4   | C44B12.5    | 4.957166583 | 1.835  | 0.370171139 | 0.312483699 |
| WBGene00011010 |          | R04D3.2     | 5.641406949 | 1.8325 | 0.324830316 | 0.312483699 |
| A_12_P111211   |          |             | 4.831563113 | 1.8175 | 0.376172257 | 0.312483699 |
| WBGene00016896 | nep-4    | C53B7.7     | 4.374600877 | 1.815  | 0.414894993 | 0.312483699 |
| WBGene00007332 |          | C05C10.5    | 4.12237995  | 1.8125 | 0.439673204 | 0.345525782 |
| WBGene00006394 | taf-11.2 | K10D3.3     | 4.283706327 | 1.8075 | 0.421947693 | 0.312483699 |
| A_12_P100632   |          |             | 4.378366663 | 1.805  | 0.41225419  | 0.312483699 |
| WBGene00011501 | rmd-1    | T05G5.7     | 4.043628673 | 1.805  | 0.446381245 | 0.345525782 |
| WBGene00045271 |          | F07G6.10    | 5.929345444 | 1.805  | 0.304418087 | 0.300971142 |
| WBGene00000757 | col-184  | F15A2.1     | 4.521426519 | 1.7975 | 0.397551523 | 0.312483699 |
| WBGene00021898 |          | Y54G2A.36   | 3.771926593 | 1.7975 | 0.47654692  | 0.345525782 |
| WBGene00022820 |          | ZK813.1     | 5.627627292 | 1.795  | 0.318962132 | 0.312483699 |
| WBGene00016485 |          | C36C9.1     | 4.345124973 | 1.785  | 0.410805215 | 0.312483699 |
| WBGene00016534 |          | C39D10.7    | 3.754815461 | 1.785  | 0.475389541 | 0.345525782 |
| WBGene00021853 |          | Y54F10AM.11 | 3.718798475 | 1.7825 | 0.479321483 | 0.345525782 |
| WBGene00008394 |          | D1086.7     | 3.78131575  | 1.7775 | 0.470074471 | 0.345525782 |
| WBGene00000608 | col-19   | ZK1193.1    | 3.809732713 | 1.77   | 0.464599523 | 0.345525782 |
| WBGene00003784 | nos-2    | ZK1127.1    | 4.384156693 | 1.77   | 0.403726446 | 0.312483699 |
| WBGene00018605 |          | F48E3.4     | 3.527350029 | 1.77   | 0.501793127 | 0.414186921 |

|                 |          |            |             |        |             |             |
|-----------------|----------|------------|-------------|--------|-------------|-------------|
| WBGene00010183  | fipr-13  | F57A8.8    | 4.437604215 | 1.7625 | 0.397173771 | 0.312483699 |
| WBGene00014516  | hpo-42   | T10C6.8    | 4.072975171 | 1.75   | 0.429661347 | 0.345525782 |
| WBGene00016627  |          | C44B7.5    | 3.790335546 | 1.75   | 0.461700548 | 0.345525782 |
| WBGene00010007  |          | F53H4.2    | 4.35421867  | 1.745  | 0.400760764 | 0.312483699 |
| WBGene00008844  |          | F15A4.10   | 4.163601925 | 1.74   | 0.417907387 | 0.312483699 |
| WBGene00000716  | col-143  | T15B7.3    | 3.602585063 | 1.7225 | 0.478128891 | 0.414186921 |
| WBGene00011320  |          | T01C3.3    | 4.509171693 | 1.72   | 0.381444779 | 0.312483699 |
| WBGene00007313  | clec-147 | C04H5.2    | 3.936171337 | 1.7125 | 0.435067443 | 0.345525782 |
| WBGene00007709  | clec-87  | C25A1.8    | 4.731152842 | 1.7125 | 0.361962519 | 0.312483699 |
| WBGene00004984  | spn-4    | ZC404.8    | 4.484380196 | 1.7075 | 0.380766109 | 0.312483699 |
| WBGene00016178  | mesp-1   | C28C12.2   | 3.726596131 | 1.7075 | 0.45819293  | 0.345525782 |
| WBGene00011342  |          | T01G5.7    | 5.928478893 | 1.695  | 0.285908077 | 0.300971142 |
| WBGene00050913  |          | T12B5.14   | 4.155616543 | 1.69   | 0.406678524 | 0.312483699 |
| WBGene00001607  | gln-6    | C28D4.3    | 3.834276787 | 1.6775 | 0.437501019 | 0.345525782 |
| WBGene00010066  |          | F54F7.6    | 7.860905865 | 1.655  | 0.210535532 | 0           |
| WBGene00010234  | ttr-50   | F58B3.9    | 4.208659577 | 1.6475 | 0.391454802 | 0.312483699 |
| WBGene00001647  | gna-2    | T23G11.2   | 3.717878123 | 1.645  | 0.442456677 | 0.345525782 |
| WBGene00016434  |          | C35B1.4    | 3.723852799 | 1.645  | 0.441746784 | 0.345525782 |
| WBGene00006047  | ssp-19   | C55C2.2    | 3.962060602 | 1.6425 | 0.414557011 | 0.345525782 |
| WBGene00050938  |          | F23H12.11  | 4.912787512 | 1.6425 | 0.334331578 | 0.312483699 |
| WBGene00014097  |          | ZK829.9    | 2.682549939 | 1.64   | 0.611358609 | 0.593984595 |
| WBGene00015083  | egg-1    | B0244.8    | 4.429234317 | 1.64   | 0.370267157 | 0.312483699 |
| WBGene00020167  |          | T02G5.11   | 5.318014704 | 1.635  | 0.307445558 | 0.312483699 |
| A_12_P159150    |          |            | 5.097186792 | 1.6325 | 0.320274706 | 0.312483699 |
| A_12_P181533    |          |            | 4.38569519  | 1.63   | 0.371662856 | 0.312483699 |
| WBGene00020433  |          | T11F8.1    | 4.063853704 | 1.63   | 0.401097116 | 0.345525782 |
| WBGene00007649  |          | C17G1.2    | 3.881135385 | 1.6275 | 0.419336055 | 0.345525782 |
| WBGene00011489  |          | T05F1.2    | 3.920448389 | 1.6275 | 0.415131087 | 0.345525782 |
| WBGene00020797  |          | T25D3.3    | 4.483074896 | 1.62   | 0.36135912  | 0.312483699 |
| WBGene00014117  | clec-91  | ZK858.3    | 4.166305209 | 1.6175 | 0.388233679 | 0.312483699 |
| WBGene00006555  | tbx-36   | ZK829.5    | 3.667659991 | 1.61   | 0.438971989 | 0.345525782 |
| WBGene00003465  | msp-78   | T13F2.11   | 5.264217568 | 1.6025 | 0.30441371  | 0.312483699 |
| WBGene00012231  |          | W04A4.2    | 4.951082689 | 1.6025 | 0.32366658  | 0.312483699 |
| WBGene00016636  | perm-2   | C44B12.1   | 5.760814967 | 1.5975 | 0.277304515 | 0.312483699 |
| WBGene00000465  | cpg-1    | C07G2.1    | 4.098370615 | 1.5825 | 0.386129062 | 0.345525782 |
| WBGene00003865  | oma-2    | ZC513.6    | 3.900130166 | 1.5825 | 0.405755688 | 0.345525782 |
| WBGene00009186  | trcs-1   | F27C8.6    | 4.549169167 | 1.5775 | 0.346766616 | 0.312483699 |
| WBGene00017548  |          | F18A1.7    | 4.649298454 | 1.5725 | 0.338223071 | 0.312483699 |
| WBGene00021596  | spsb-2   | Y46E12BL.3 | 4.237099263 | 1.5725 | 0.371126543 | 0.312483699 |
| WBGene00016658  |          | C45B2.1    | 4.074687619 | 1.5675 | 0.384692066 | 0.345525782 |
| WBGene00011461  |          |            | 3.956919643 | 1.565  | 0.395509674 | 0.345525782 |
| WBGene00007521  |          | C11E4.7    | 4.798507142 | 1.555  | 0.32405912  | 0.312483699 |
| WBGene000077443 |          | Y71A12B.19 | 3.440859003 | 1.5525 | 0.451195471 | 0.414186921 |
| WBGene00008207  |          | C49F5.3    | 5.176932988 | 1.5475 | 0.298922162 | 0.312483699 |
| WBGene00000754  | col-181  | W03G11.1   | 3.603658875 | 1.545  | 0.428730924 | 0.414186921 |
| WBGene00000752  | col-179  | C34F6.3    | 3.894829098 | 1.5425 | 0.396037916 | 0.345525782 |
| WBGene00000680  | col-106  | Y77E11A.15 | 3.202158926 | 1.54   | 0.480925537 | 0.489403914 |
| WBGene00000698  | col-124  | C24F3.6    | 2.757328946 | 1.54   | 0.558511527 | 0.495348337 |
| WBGene00017648  | ddo-3    | F20H11.5   | 3.665891104 | 1.5375 | 0.419406894 | 0.345525782 |
| WBGene00011350  | perm-1   | T01H3.4    | 4.047413722 | 1.535  | 0.379254533 | 0.345525782 |
| WBGene00020350  |          | T08B2.12   | 5.847168757 | 1.5325 | 0.262092658 | 0.300971142 |
| WBGene00044474  |          | F56D6.12   | 4.815929118 | 1.5175 | 0.315100153 | 0.312483699 |
| WBGene00017747  |          | F23F1.6    | 3.754434749 | 1.51   | 0.402191036 | 0.345525782 |
| WBGene00022875  |          | ZK1248.4   | 3.019187667 | 1.505  | 0.498478454 | 0.495348337 |
| WBGene00000866  | cyb-2.1  | Y43E12A.1  | 3.87190035  | 1.5025 | 0.388052342 | 0.345525782 |
| WBGene00001606  | gln-5    | F26D10.10  | 4.185394212 | 1.5025 | 0.358986495 | 0.312483699 |
| WBGene00012747  |          | Y40H7A.10  | 3.358232116 | 1.5025 | 0.447408025 | 0.463367002 |
| WBGene000020786 |          | T25B2.2    | 4.924455587 | 1.4925 | 0.303079188 | 0.312483699 |
| WBGene00000867  | cyb-2.2  | H31G24.4   | 4.858045404 | 1.4875 | 0.306193104 | 0.312483699 |
| WBGene00010353  |          | H02I12.5   | 3.806166841 | 1.4875 | 0.390813136 | 0.345525782 |
| A_12_P167224    |          |            | 3.852613212 | 1.475  | 0.382857016 | 0.345525782 |
| WBGene00003184  | mei-2    | F57B10.12  | 4.63542137  | 1.475  | 0.318201924 | 0.312483699 |
| WBGene00011929  |          | T22G5.1    | 5.375279924 | 1.475  | 0.274404314 | 0.312483699 |
| WBGene00003425  | msp-10   | K07F5.2    | 3.19537733  | 1.4725 | 0.460821946 | 0.489403914 |
| WBGene00003464  | msp-77   | F32B6.6    | 3.477919244 | 1.4675 | 0.421947693 | 0.414186921 |
| WBGene00003466  | msp-79   | T13F2.10   | 3.20279931  | 1.4675 | 0.45819293  | 0.489403914 |
| WBGene00003463  | msp-76   | ZK1251.6   | 3.042333161 | 1.465  | 0.48153832  | 0.495348337 |
| WBGene00022002  |          | Y59E9AR.7  | 3.904246388 | 1.465  | 0.375232466 | 0.345525782 |
| WBGene00008590  |          | F08H9.2    | 4.352197315 | 1.4625 | 0.336037154 | 0.312483699 |
| WBGene00003228  | mex-1    | W03C9.7    | 4.800732888 | 1.46   | 0.304120232 | 0.312483699 |

|                |          |            |             |        |             |             |
|----------------|----------|------------|-------------|--------|-------------|-------------|
| WBGene00003443 | msp-50   | C34F11.4   | 3.749212543 | 1.455  | 0.388081493 | 0.345525782 |
| WBGene00011986 |          | T24D1.3    | 3.415999775 | 1.455  | 0.425936796 | 0.463367002 |
| WBGene00004239 | puf-3    | Y45F10A.2  | 4.418870391 | 1.4525 | 0.328703916 | 0.312483699 |
| WBGene00003452 | msp-59   | ZK354.11   | 3.146894268 | 1.45   | 0.460771757 | 0.489403914 |
| WBGene00022257 | puf-11   | Y73B6BL.38 | 4.411851258 | 1.45   | 0.328660219 | 0.312483699 |
| WBGene00000473 | cey-2    | F46F11.2   | 4.793847755 | 1.4475 | 0.301949514 | 0.312483699 |
| WBGene00007097 |          | B0024.4    | 5.768241325 | 1.445  | 0.25050963  | 0.312483699 |
| WBGene00014116 |          | ZK858.2    | 3.41452426  | 1.44   | 0.421727857 | 0.463367002 |
| WBGene00017986 |          | F32D1.7    | 3.930104767 | 1.44   | 0.366402446 | 0.345525782 |
| WBGene00021763 |          | Y51F10.2   | 5.186476753 | 1.44   | 0.277645128 | 0.312483699 |
| WBGene00003426 | msp-19   | F36H12.7   | 3.555931133 | 1.4375 | 0.404254173 | 0.414186921 |
| WBGene00016447 | msd-4    | C35D10.11  | 2.981172269 | 1.43   | 0.479677077 | 0.495348337 |
| WBGene00017718 |          | F22F4.5    | 2.905828621 | 1.43   | 0.492114363 | 0.495348337 |
| WBGene00007278 | lab-1    | C03D6.6    | 2.939111872 | 1.4275 | 0.485690937 | 0.495348337 |
| WBGene00016893 |          | C53B7.2    | 4.936964672 | 1.4225 | 0.288132505 | 0.312483699 |
| WBGene00018084 |          | F36A4.5    | 2.910892223 | 1.4225 | 0.488681782 | 0.495348337 |
| WBGene00021997 |          | Y59E9AR.1  | 3.690548839 | 1.4175 | 0.384089213 | 0.345525782 |
| WBGene00000657 | col-81   | F38A3.1    | 3.48329056  | 1.415  | 0.406225084 | 0.414186921 |
| WBGene00000989 | dhs-26   | ZK816.5    | 2.891480254 | 1.4125 | 0.488504114 | 0.495348337 |
| WBGene00020948 |          | W02F12.3   | 3.79843008  | 1.4125 | 0.371864157 | 0.345525782 |
| WBGene00021207 |          | Y18H1A.1   | 4.166431159 | 1.4125 | 0.339019162 | 0.312483699 |
| WBGene00045105 |          | Y7A9C.11   | 3.740780124 | 1.4125 | 0.377595034 | 0.345525782 |
| WBGene00008218 | nasp-2   | C50B6.2    | 3.87926502  | 1.41   | 0.363470913 | 0.345525782 |
| WBGene00000301 | cav-1    | T13F2.8    | 4.596250622 | 1.4075 | 0.306227862 | 0.312483699 |
| WBGene00014675 |          | C12D8.3    | 3.162181116 | 1.4075 | 0.44510417  | 0.489403914 |
| WBGene00009701 | egg-3    | F44F4.2    | 4.280939662 | 1.405  | 0.328198973 | 0.312483699 |
| WBGene00012789 |          | Y43D4A.3   | 6.083541686 | 1.4025 | 0.230540049 | 0.300971142 |
| WBGene00000713 | col-140  | F26F12.1   | 2.976767148 | 1.395  | 0.468629198 | 0.495348337 |
| WBGene00008464 |          | E02H4.6    | 4.249645937 | 1.395  | 0.328262641 | 0.312483699 |
| A_12_P154291   |          |            | 5.357664125 | 1.3925 | 0.259908043 | 0.312483699 |
| WBGene00012224 |          | W03G11.2   | 3.618546988 | 1.3925 | 0.38482297  | 0.414186921 |
| WBGene00003457 | msp-64   | ZK1248.6   | 3.172208255 | 1.385  | 0.436604374 | 0.489403914 |
| WBGene00009005 |          | F21C3.6    | 3.968917    | 1.385  | 0.348961694 | 0.345525782 |
| WBGene00009626 |          | F42A8.1    | 3.258225188 | 1.385  | 0.425078047 | 0.463367002 |
| WBGene00016243 |          |            | 3.662726749 | 1.385  | 0.378133586 | 0.345525782 |
| WBGene00003231 | mex-6    | AH6.5      | 4.539428578 | 1.3825 | 0.304553751 | 0.312483699 |
| WBGene00003444 | msp-51   | ZK354.5    | 3.371697756 | 1.38   | 0.409289355 | 0.463367002 |
| WBGene00011063 | cpg-3    | R06C7.4    | 3.344225538 | 1.38   | 0.412651594 | 0.463367002 |
| WBGene00011898 |          | T21C9.13   | 4.264660896 | 1.38   | 0.32358962  | 0.312483699 |
| A_12_P172558   |          |            | 3.993018015 | 1.3775 | 0.344977156 | 0.345525782 |
| WBGene00003438 | msp-45   | F58A6.8    | 2.943215554 | 1.375  | 0.467176112 | 0.495348337 |
| WBGene00003462 | msp-74   | F09C12.7   | 3.410890382 | 1.375  | 0.403120548 | 0.463367002 |
| WBGene00007757 |          | C27A7.6    | 4.106147109 | 1.375  | 0.334863794 | 0.345525782 |
| WBGene00000496 | chs-1    | T25G3.2    | 4.490631695 | 1.3725 | 0.305636288 | 0.312483699 |
| WBGene00003434 | msp-38   | K08F4.8    | 3.888103211 | 1.3725 | 0.352999889 | 0.345525782 |
| WBGene00011173 | acs-18   | R09E10.3   | 3.266954432 | 1.37   | 0.419350814 | 0.463367002 |
| WBGene00011434 |          | T04D3.5    | 2.981765877 | 1.37   | 0.459459279 | 0.495348337 |
| WBGene00012879 | fbxa-215 | Y45F10C.3  | 5.216772648 | 1.3675 | 0.26213525  | 0.312483699 |
| WBGene00007301 |          | C04F12.7   | 4.199224531 | 1.365  | 0.325060018 | 0.312483699 |
| WBGene00010633 | nspd-2   | K07F5.5    | 3.802052155 | 1.3625 | 0.358359103 | 0.345525782 |
| WBGene00016752 |          | C48E7.7    | 4.358714653 | 1.36   | 0.31201859  | 0.312483699 |
| WBGene00003448 | msp-55   | C09B9.6    | 3.010698027 | 1.3575 | 0.450892115 | 0.495348337 |
| WBGene00007751 |          | C26G2.2    | 3.648118402 | 1.3575 | 0.372109633 | 0.345525782 |
| WBGene00009130 |          | F25H5.8    | 3.490136931 | 1.355  | 0.388236916 | 0.414186921 |
| WBGene00013349 |          | Y59A8B.12  | 3.080061747 | 1.3525 | 0.439114573 | 0.489403914 |
| WBGene00000598 | col-9    | F54B11.1   | 3.668380851 | 1.3475 | 0.367328272 | 0.345525782 |
| WBGene00003541 | nas-22   | T11F9.6    | 3.840785999 | 1.3475 | 0.350839646 | 0.345525782 |
| WBGene00003395 | mom-2    | F38E1.7    | 5.194652226 | 1.345  | 0.258920124 | 0.312483699 |
| WBGene00003469 | msp-142  | K05F1.2    | 3.339593016 | 1.34   | 0.401246497 | 0.463367002 |
| WBGene00009035 |          | F22B3.4    | 4.829738421 | 1.34   | 0.277447738 | 0.312483699 |
| WBGene00017985 |          | F32D1.6    | 4.387486147 | 1.34   | 0.30541407  | 0.312483699 |
| WBGene00003456 | msp-63   | K05F1.7    | 3.065173082 | 1.3375 | 0.436353825 | 0.495348337 |
| WBGene00020684 |          | T22D1.5    | 5.259262453 | 1.3375 | 0.254313226 | 0.312483699 |
| WBGene00013567 |          | Y75B12B.1  | 4.405237354 | 1.335  | 0.30304837  | 0.312483699 |
| WBGene00017258 |          | F08F1.4    | 6.878010671 | 1.335  | 0.19409682  | 0.300971142 |
| WBGene00008080 |          | C44B9.3    | 3.944718419 | 1.3325 | 0.337793439 | 0.345525782 |
| WBGene00022653 |          | ZK105.1    | 4.077635918 | 1.33   | 0.326169385 | 0.345525782 |
| WBGene00011690 |          | T10C6.9    | 6.800931574 | 1.3275 | 0.195193847 | 0.300971142 |
| WBGene00017978 |          | F32B5.4    | 3.718040548 | 1.3275 | 0.357042905 | 0.345525782 |
| WBGene00004908 | snf-9    | C49C3.1    | 3.535215491 | 1.325  | 0.374800349 | 0.414186921 |

|                |         |            |             |        |             |             |
|----------------|---------|------------|-------------|--------|-------------|-------------|
| WBGene00009695 |         | F44F1.3    | 3.389893583 | 1.325  | 0.390867727 | 0.463367002 |
| WBGene00019920 | acs-15  | R07C3.4    | 3.417884824 | 1.325  | 0.387666662 | 0.463367002 |
| WBGene00022652 |         | ZK84.5     | 3.233384775 | 1.325  | 0.409787295 | 0.489403914 |
| WBGene00007643 | 41336   | C17E4.3    | 3.935938809 | 1.3225 | 0.33600624  | 0.345525782 |
| WBGene00017851 |         | F27C1.1    | 3.317178418 | 1.3225 | 0.398682203 | 0.463367002 |
| WBGene00004966 | spe-12  | T02E1.1    | 3.635302626 | 1.32   | 0.363105946 | 0.414186921 |
| WBGene00009682 | msd-2   | F44D12.5   | 3.518705191 | 1.32   | 0.375137992 | 0.414186921 |
| WBGene00019811 | egg-2   | R01H2.3    | 3.917120969 | 1.32   | 0.336982189 | 0.345525782 |
| WBGene00019341 |         | K02F6.7    | 3.046696581 | 1.3175 | 0.432435579 | 0.495348337 |
| WBGene00021781 |         | Y51H7C.3   | 3.845336454 | 1.315  | 0.341972677 | 0.345525782 |
| WBGene00007794 |         | C28D4.7    | 3.342388458 | 1.3125 | 0.392683261 | 0.463367002 |
| WBGene00011336 | ubxn-5  | T01E8.9    | 3.764700225 | 1.3125 | 0.348633336 | 0.345525782 |
| WBGene00013383 |         | Y62E10A.17 | 4.139033584 | 1.3125 | 0.317103008 | 0.345525782 |
| WBGene00021056 |         | W06B4.1    | 3.532107569 | 1.3125 | 0.371591174 | 0.414186921 |
| WBGene00022005 |         | Y59H11AM.1 | 3.524347207 | 1.3125 | 0.372409392 | 0.414186921 |
| WBGene00008801 | acp-3   | F14E5.3    | 3.368728246 | 1.31   | 0.388870786 | 0.463367002 |
| WBGene00006050 | ssq-1   | K07F5.11   | 2.912016496 | 1.3075 | 0.449001577 | 0.495348337 |
| WBGene00006977 | zif-1   | F59B2.6    | 4.077420971 | 1.3075 | 0.320668386 | 0.345525782 |
| WBGene00012716 |         | Y39E4B.5   | 5.639294202 | 1.3075 | 0.231855256 | 0.312483699 |
| WBGene00002090 | ins-7   | ZK1251.2   | 2.906995167 | 1.305  | 0.448917155 | 0.495348337 |
| WBGene00014194 |         | ZK1037.6   | 4.319207722 | 1.3025 | 0.301559935 | 0.312483699 |
| WBGene00011711 |         |            | 4.013982635 | 1.2975 | 0.323245046 | 0.345525782 |
| WBGene00020910 | dgtr-1  | W01A11.2   | 4.406217597 | 1.2975 | 0.294470251 | 0.312483699 |
| WBGene00017584 |         | F19B10.2   | 3.867961338 | 1.295  | 0.334801692 | 0.345525782 |
| WBGene00004243 | puf-7   | B0273.2    | 5.040350245 | 1.2925 | 0.256430593 | 0.312483699 |
| WBGene00003424 | misp-3  | F26G1.7    | 3.287076056 | 1.2875 | 0.391685491 | 0.463367002 |
| WBGene00017059 |         | D2062.7    | 4.30920908  | 1.2875 | 0.298778726 | 0.312483699 |
| WBGene00022237 |         | Y73B6BL.14 | 4.271475264 | 1.2875 | 0.30141811  | 0.312483699 |
| WBGene00003431 | misp-33 | R05F9.8    | 3.137074167 | 1.285  | 0.409617348 | 0.489403914 |
| WBGene00044475 |         | F56D6.13   | 3.577216316 | 1.285  | 0.359217863 | 0.414186921 |
| A_12_P107060   |         |            | 3.717289911 | 1.28   | 0.344336877 | 0.345525782 |
| WBGene00012790 |         | Y43D4A.4   | 5.264448117 | 1.28   | 0.243140396 | 0.312483699 |
| WBGene00016558 |         | C41A3.1    | 3.004895395 | 1.28   | 0.425971567 | 0.495348337 |
| WBGene00020860 | nspd-10 | T27C10.7   | 4.736979276 | 1.28   | 0.270214397 | 0.312483699 |
| WBGene00003429 | misp-31 | R05F9.13   | 3.864143758 | 1.2775 | 0.330603642 | 0.345525782 |
| WBGene00006056 | sss-1   | F32B6.5    | 3.371560461 | 1.2775 | 0.378904669 | 0.463367002 |
| WBGene00018128 |         | F36H12.15  | 3.294723038 | 1.2775 | 0.387741241 | 0.463367002 |
| WBGene00014674 |         | C12D8.2    | 3.573547891 | 1.275  | 0.356788278 | 0.414186921 |
| WBGene00022760 |         | ZK546.3    | 4.263726938 | 1.275  | 0.299034159 | 0.312483699 |
| WBGene00019606 | clec-88 | K10B2.3    | 4.025579097 | 1.2725 | 0.316103589 | 0.345525782 |
| WBGene00022537 |         | ZC190.2    | 5.387793075 | 1.2725 | 0.236182048 | 0.312483699 |
| WBGene0000638  | col-62  | C15A11.6   | 4.023784305 | 1.27   | 0.31562328  | 0.345525782 |
| WBGene00021206 |         | Y17G9B.9   | 3.772540986 | 1.27   | 0.336643129 | 0.345525782 |
| WBGene00003435 | misp-40 | C33F10.9   | 3.541249925 | 1.265  | 0.357218504 | 0.414186921 |
| WBGene00003449 | misp-56 | K07F5.3    | 3.240224738 | 1.265  | 0.390405019 | 0.489403914 |
| WBGene00022706 |         | ZK354.3    | 3.611205663 | 1.2625 | 0.349606231 | 0.414186921 |
| WBGene00003783 | nos-1   | R03D7.7    | 4.415525235 | 1.26   | 0.285356766 | 0.312483699 |
| WBGene00009449 |         | F35H8.4    | 3.705388804 | 1.26   | 0.340045287 | 0.345525782 |
| WBGene00015698 | kca-1   | C10H11.10  | 3.825631337 | 1.2575 | 0.328703916 | 0.345525782 |
| WBGene00004242 | puf-6   | F18A11.1   | 3.937897667 | 1.255  | 0.318697972 | 0.345525782 |
| WBGene00016399 |         | C34D4.3    | 3.410621782 | 1.255  | 0.367968095 | 0.463367002 |
| A_12_P136645   |         |            | 3.697818155 | 1.2525 | 0.338713249 | 0.345525782 |
| WBGene00011172 |         | R09E10.2   | 4.24708143  | 1.2525 | 0.294908403 | 0.312483699 |
| WBGene00015907 |         | C17F3.1    | 4.851319125 | 1.2525 | 0.258177202 | 0.312483699 |
| WBGene00019189 |         | H11L12.1   | 4.167416097 | 1.25   | 0.299946051 | 0.312483699 |
| WBGene00022884 |         | ZK1248.17  | 2.713586775 | 1.25   | 0.460644934 | 0.593984595 |
| WBGene00003442 | misp-49 | C34F11.6   | 3.092353983 | 1.2475 | 0.403414359 | 0.489403914 |
| WBGene00012683 | asp-17  | Y39B6A.24  | 4.656845436 | 1.2475 | 0.267885206 | 0.312483699 |
| WBGene00021114 |         | W09C3.7    | 3.315367263 | 1.2425 | 0.374769943 | 0.463367002 |
| WBGene00004026 | phy-3   | T20B3.7    | 2.926004733 | 1.24   | 0.423786054 | 0.495348337 |
| WBGene00015987 |         | C18G1.9    | 3.532424235 | 1.24   | 0.351033714 | 0.414186921 |
| WBGene00021035 |         | W05F2.3    | 4.537149784 | 1.24   | 0.273299331 | 0.312483699 |
| WBGene00009681 | gipc-2  | F44D12.4   | 3.658827877 | 1.2375 | 0.338223071 | 0.345525782 |
| WBGene00012294 | nspa-8  | W06A7.5    | 3.158183307 | 1.2375 | 0.391839194 | 0.489403914 |
| WBGene00016742 |         | C48B6.4    | 4.330111961 | 1.2375 | 0.285789377 | 0.312483699 |
| WBGene00021658 |         | Y48G1A.2   | 5.096207187 | 1.2375 | 0.242827647 | 0.312483699 |
| WBGene00013474 |         | Y69E1A.2   | 3.770423691 | 1.2325 | 0.32688634  | 0.345525782 |
| WBGene00016568 |         | C41G11.1   | 3.506863889 | 1.23   | 0.35074073  | 0.414186921 |
| WBGene00044062 | snb-6   | T14D7.3    | 5.758079104 | 1.2225 | 0.212310386 | 0.312483699 |
| WBGene00011462 | scl-22  | T05A10.5   | 2.857364311 | 1.22   | 0.426966906 | 0.495348337 |

|                |          |             |             |        |             |             |
|----------------|----------|-------------|-------------|--------|-------------|-------------|
| WBGene00009324 |          | F32B6.10    | 3.096236943 | 1.2175 | 0.39321926  | 0.489403914 |
| WBGene00019950 | clec-175 | R08C7.6     | 2.872062527 | 1.2175 | 0.423911384 | 0.495348337 |
| WBGene00043743 |          | Y59E9AL.2   | 3.390416509 | 1.2175 | 0.359100422 | 0.463367002 |
| WBGene00000474 | cey-3    | M01E11.5    | 3.758711136 | 1.215  | 0.323249102 | 0.345525782 |
| WBGene00012020 | gyg-2    | T25E12.5    | 3.814493983 | 1.2125 | 0.317866539 | 0.345525782 |
| WBGene00020035 | egg-5    | R12E2.10    | 3.252022656 | 1.2125 | 0.372844881 | 0.463367002 |
| WBGene00015937 |          | C17H12.12   | 3.715583036 | 1.21   | 0.325655486 | 0.345525782 |
| WBGene00044554 |          | F41E6.15    | 3.735191925 | 1.21   | 0.323945871 | 0.345525782 |
| WBGene00008433 | 41335    | D2089.2     | 4.414621317 | 1.205  | 0.272956594 | 0.312483699 |
| WBGene00011748 |          | T13F2.9     | 3.284130512 | 1.205  | 0.366915991 | 0.463367002 |
| WBGene00017944 |          | F31D5.1     | 3.021293445 | 1.205  | 0.398835804 | 0.495348337 |
| WBGene00018081 |          | F36A4.2     | 3.714381377 | 1.205  | 0.324414722 | 0.345525782 |
| WBGene00003433 | misp-37  | K08F4.10    | 3.517023904 | 1.2025 | 0.341908396 | 0.414186921 |
| WBGene00007320 |          | C05B5.2     | 3.899061436 | 1.2025 | 0.308407554 | 0.345525782 |
| WBGene00019501 |          | K07E12.2    | 2.793792564 | 1.2    | 0.429523657 | 0.495348337 |
| WBGene00003470 | misp-152 | ZK546.6     | 3.341886393 | 1.1975 | 0.358330553 | 0.463367002 |
| WBGene00016501 |          | C37C3.9     | 4.188019576 | 1.195  | 0.28533773  | 0.312483699 |
| WBGene00022754 | nspd-1   | ZK484.8     | 3.68502482  | 1.195  | 0.324285468 | 0.345525782 |
| WBGene00016351 |          | C33F10.1    | 3.953508522 | 1.1925 | 0.301630816 | 0.345525782 |
| WBGene00008754 |          | F13E9.5     | 3.181339879 | 1.19   | 0.37405623  | 0.489403914 |
| WBGene00011176 |          | R09E10.6    | 3.874747015 | 1.19   | 0.307116825 | 0.345525782 |
| WBGene00013858 | ssp-34   | ZC168.6     | 3.342624785 | 1.185  | 0.354511821 | 0.463367002 |
| WBGene00017902 |          | F28E10.4    | 3.206648283 | 1.1825 | 0.368765108 | 0.489403914 |
| WBGene00013380 |          | Y62E10A.14  | 3.435266518 | 1.18   | 0.34349591  | 0.414186921 |
| WBGene00000656 | col-80   | C09G5.5     | 2.724671204 | 1.1775 | 0.432162236 | 0.593984595 |
| WBGene00006052 | ssq-3    | ZC477.1     | 3.51770076  | 1.1775 | 0.334735693 | 0.414186921 |
| WBGene00018840 |          | F54H5.3     | 3.012552819 | 1.1775 | 0.390864516 | 0.495348337 |
| WBGene00007795 |          | C28D4.8     | 4.073669479 | 1.175  | 0.288437736 | 0.345525782 |
| WBGene00010493 | meg-2    | K02B9.2     | 3.254541365 | 1.175  | 0.361033973 | 0.463367002 |
| WBGene00013887 | nspa-5   | ZC412.6     | 3.235594685 | 1.175  | 0.363148081 | 0.489403914 |
| WBGene00001683 | gpd-1    | T09F3.3     | 5.423198123 | 1.1725 | 0.216200842 | 0.312483699 |
| WBGene00010381 |          | H12D21.5    | 3.040229806 | 1.17   | 0.38483933  | 0.495348337 |
| WBGene00010091 | ssp-35   | F55C5.1     | 3.398764374 | 1.1675 | 0.34350719  | 0.463367002 |
| WBGene00000868 | cyb-3    | T06E6.2     | 4.765224914 | 1.165  | 0.244479541 | 0.312483699 |
| WBGene00015312 |          | C01G8.1     | 4.018151294 | 1.165  | 0.289934329 | 0.345525782 |
| WBGene00016058 | nspd-3   | C24D10.7    | 3.744154465 | 1.165  | 0.311151693 | 0.345525782 |
| WBGene00014239 |          | ZK1225.5    | 2.91990121  | 1.1625 | 0.398129908 | 0.495348337 |
| WBGene00014987 |          | ZK637.6     | 3.683432346 | 1.1625 | 0.315602376 | 0.345525782 |
| A_12_P178289   |          |             | 3.572647656 | 1.16   | 0.324689169 | 0.414186921 |
| A_12_P159213   |          |             | 4.336337397 | 1.155  | 0.266353813 | 0.312483699 |
| WBGene00013888 | nspa-3   | ZC412.7     | 2.79514283  | 1.155  | 0.413216809 | 0.495348337 |
| WBGene00016288 |          | C31H1.5     | 3.786727786 | 1.155  | 0.305012683 | 0.345525782 |
| WBGene00020652 | egg-4    | T21E3.1     | 3.855053419 | 1.155  | 0.299606743 | 0.345525782 |
| A_12_P159211   |          |             | 4.512194015 | 1.1525 | 0.255418982 | 0.312483699 |
| WBGene00009377 |          | F34D10.8    | 3.816416007 | 1.1525 | 0.301984898 | 0.345525782 |
| WBGene00010563 |          | K04G2.4     | 3.442056901 | 1.1525 | 0.334828863 | 0.414186921 |
| WBGene00013696 |          | Y106G6A.4   | 3.663027019 | 1.1525 | 0.314630494 | 0.345525782 |
| WBGene00009457 |          | F36A2.10    | 3.381902048 | 1.15   | 0.340045287 | 0.463367002 |
| WBGene00010650 |          | K08C9.1     | 3.172195655 | 1.1475 | 0.36173683  | 0.489403914 |
| WBGene00020713 |          | T23B3.5     | 4.268425174 | 1.1475 | 0.268834512 | 0.312483699 |
| WBGene00008440 |          | DY3.8       | 4.507732038 | 1.145  | 0.254008    | 0.312483699 |
| WBGene00010351 | cbd-1    | H02112.1    | 4.091574787 | 1.1425 | 0.27923234  | 0.345525782 |
| WBGene00012211 | ssp-37   | W02D9.5     | 3.592928106 | 1.14   | 0.317289956 | 0.414186921 |
| A_12_P166055   |          |             | 3.475722984 | 1.1375 | 0.32727004  | 0.414186921 |
| WBGene00004813 | skr-7    | Y47D7A.1    | 3.498356885 | 1.1375 | 0.325152647 | 0.414186921 |
| WBGene00007601 |          | C15C6.2     | 2.986566533 | 1.1375 | 0.380872145 | 0.495348337 |
| WBGene00017058 |          | D2062.6     | 3.692014601 | 1.1375 | 0.308097373 | 0.345525782 |
| WBGene00015780 |          | C14F11.4    | 3.93923311  | 1.1325 | 0.287492506 | 0.345525782 |
| WBGene00019336 |          |             | 2.718215992 | 1.1325 | 0.416633558 | 0.593984595 |
| WBGene00021996 |          | Y59E9AL.6   | 3.938200382 | 1.1325 | 0.287567897 | 0.345525782 |
| A_12_P159214   |          |             | 4.369765528 | 1.13   | 0.258595111 | 0.312483699 |
| WBGene00000654 | col-78   | W07A12.5    | 3.733772596 | 1.13   | 0.302642963 | 0.345525782 |
| WBGene00003230 | mex-5    | W02A2.7     | 3.00059173  | 1.13   | 0.376592386 | 0.495348337 |
| WBGene00010933 |          | M162.7      | 3.300710841 | 1.13   | 0.342350498 | 0.463367002 |
| WBGene00013827 |          | Y116F11B.11 | 3.713068258 | 1.13   | 0.304330522 | 0.345525782 |
| WBGene00022780 |          | ZK622.1     | 2.859179312 | 1.13   | 0.395218304 | 0.495348337 |
| WBGene00007793 |          | C28D4.5     | 3.387254694 | 1.1275 | 0.332865433 | 0.463367002 |
| WBGene00011460 | ttr-14   | T05A10.3    | 3.334203367 | 1.1275 | 0.338161736 | 0.463367002 |
| WBGene00001413 | fem-3    | C01F6.4     | 4.097994858 | 1.125  | 0.274524503 | 0.345525782 |
| WBGene00012781 | nspd-7   | Y43C5A.1    | 3.459527851 | 1.125  | 0.325188884 | 0.414186921 |

|                |         |            |             |        |             |             |
|----------------|---------|------------|-------------|--------|-------------|-------------|
| WBGene00019026 |         | F58A6.9    | 3.488354539 | 1.125  | 0.322501623 | 0.414186921 |
| A_12_P173482   |         |            | 5.285648432 | 1.1225 | 0.212367511 | 0.312483699 |
| WBGene00006040 | ssp-11  | T28H11.6   | 3.6056541   | 1.12   | 0.310623251 | 0.414186921 |
| WBGene00007159 |         | B0379.7    | 3.611378448 | 1.1175 | 0.30943863  | 0.414186921 |
| WBGene00011551 |         | T06G6.12   | 6.254851383 | 1.1175 | 0.178661319 | 0.300971142 |
| WBGene00012185 |         | W01F3.2    | 3.806310259 | 1.1175 | 0.293591411 | 0.345525782 |
| WBGene00013208 |         | Y54G9A.5   | 2.800694825 | 1.1175 | 0.399008128 | 0.495348337 |
| WBGene00017386 | nspd-5  | F11G11.8   | 2.927873645 | 1.115  | 0.380822445 | 0.495348337 |
| WBGene00006048 | ssp-31  | ZK1225.6   | 3.348808265 | 1.1125 | 0.332207732 | 0.463367002 |
| WBGene00019430 |         | K06A5.2    | 3.067317028 | 1.1125 | 0.362694821 | 0.495348337 |
| WBGene00006051 | ssq-2   | T28H11.5   | 3.438548492 | 1.11   | 0.322810629 | 0.414186921 |
| WBGene00009651 |         | F43D2.2    | 5.852002044 | 1.11   | 0.189678676 | 0.300971142 |
| WBGene00015244 |         | B0524.5    | 2.712662264 | 1.11   | 0.409192112 | 0.593984595 |
| WBGene00021795 |         | Y52E8A.2   | 3.631508984 | 1.11   | 0.305658063 | 0.414186921 |
| WBGene00009959 |         | F53B6.4    | 3.213704381 | 1.1075 | 0.344617883 | 0.489403914 |
| WBGene00013988 |         | ZK512.10   | 3.185881992 | 1.1075 | 0.34762744  | 0.489403914 |
| WBGene00010611 |         | K07A1.4    | 3.892405379 | 1.105  | 0.283886156 | 0.345525782 |
| WBGene00013862 | wdr-5.3 | ZC302.2    | 5.922959875 | 1.105  | 0.186562128 | 0.300971142 |
| WBGene00016612 |         | C43G2.3    | 2.826486127 | 1.105  | 0.390944781 | 0.495348337 |
| WBGene00010136 |         | F55H12.5   | 4.310652403 | 1.1    | 0.255181791 | 0.312483699 |
| WBGene00016421 | cdc-7   | C34G6.5    | 3.041448345 | 1.1    | 0.361669795 | 0.495348337 |
| WBGene00000712 | col-139 | F41F3.4    | 4.236015203 | 1.0975 | 0.259087833 | 0.312483699 |
| A_12_P159210   |         |            | 4.979741197 | 1.095  | 0.219890945 | 0.312483699 |
| A_12_P159212   |         |            | 3.483574516 | 1.095  | 0.314332303 | 0.414186921 |
| WBGene00009085 |         | F23D12.1   | 3.245132077 | 1.095  | 0.337428485 | 0.463367002 |
| WBGene00014158 |         | ZK938.1    | 3.349419358 | 1.095  | 0.326922336 | 0.463367002 |
| WBGene00013303 |         | Y57G11C.5  | 3.266194929 | 1.0925 | 0.334487079 | 0.463367002 |
| WBGene00015850 |         | C16C8.12   | 3.197848194 | 1.0925 | 0.34163598  | 0.489403914 |
| WBGene00012937 |         | Y47D3A.31  | 2.708817878 | 1.09   | 0.402389547 | 0.593984595 |
| WBGene00018013 | phf-10  | F33E11.6   | 3.832590291 | 1.09   | 0.284402954 | 0.345525782 |
| WBGene00010486 |         | K01H12.4   | 3.412012213 | 1.0875 | 0.318726878 | 0.463367002 |
| WBGene00013653 |         | Y105C5B.14 | 3.290065437 | 1.0875 | 0.330540538 | 0.463367002 |
| WBGene00016036 |         |            | 2.803767931 | 1.0875 | 0.387870903 | 0.495348337 |
| WBGene00007378 |         | C06C3.8    | 2.916849429 | 1.085  | 0.371976691 | 0.495348337 |
| WBGene00009269 |         | F30A10.12  | 3.18003858  | 1.08   | 0.339618521 | 0.489403914 |
| WBGene00010137 | ztf-26  | F55H12.6   | 3.029565691 | 1.08   | 0.356486741 | 0.495348337 |
| WBGene00012787 |         | Y43D4A.1   | 4.257425064 | 1.08   | 0.253674459 | 0.312483699 |
| WBGene00013087 |         | Y51B9A.5   | 3.540228253 | 1.08   | 0.305065076 | 0.414186921 |
| WBGene00016440 | gipc-1  | C35D10.2   | 3.386858112 | 1.08   | 0.318879612 | 0.463367002 |
| WBGene00019260 |         | H34I24.1   | 3.601076033 | 1.08   | 0.299910357 | 0.414186921 |
| WBGene00016360 |         | C33G8.2    | 4.28510566  | 1.0775 | 0.251452376 | 0.312483699 |
| WBGene00045355 |         | D1086.17   | 3.953437991 | 1.0775 | 0.272547591 | 0.345525782 |
| WBGene00017452 | bath-29 | F14D2.4    | 3.038794847 | 1.075  | 0.353758662 | 0.495348337 |
| WBGene00021869 |         | Y54G2A.3   | 3.726974204 | 1.075  | 0.288437736 | 0.345525782 |
| WBGene00022162 |         | Y71G12B.27 | 3.628208528 | 1.0725 | 0.29560043  | 0.414186921 |
| WBGene00011134 | ssp-33  | R08A2.3    | 4.402458076 | 1.07   | 0.24304604  | 0.312483699 |
| WBGene00022006 | mpst-5  | Y59H11AM.2 | 3.370898248 | 1.07   | 0.317422812 | 0.463367002 |
| WBGene00005753 |         | C14B1.2    | 3.539094631 | 1.0675 | 0.301630816 | 0.414186921 |
| WBGene00015908 |         | C17F3.3    | 3.269183656 | 1.0675 | 0.326534117 | 0.463367002 |
| WBGene00009656 |         | F43G6.3    | 3.338608933 | 1.065  | 0.318995133 | 0.463367002 |
| WBGene00018087 |         | F36D4.1    | 2.826076509 | 1.065  | 0.376847547 | 0.495348337 |
| WBGene00022632 |         | ZC581.2    | 3.240585373 | 1.065  | 0.328644327 | 0.489403914 |
| WBGene00000682 | col-108 | Y41D4A.2   | 2.866922905 | 1.0625 | 0.370606408 | 0.495348337 |
| WBGene00011295 |         | R102.8     | 2.9170025   | 1.06   | 0.36338673  | 0.495348337 |
| WBGene00013956 |         | ZK265.3    | 3.448346726 | 1.06   | 0.307393683 | 0.414186921 |
| WBGene00015348 |         | C02F5.5    | 3.512322094 | 1.06   | 0.301794645 | 0.414186921 |
| WBGene00007507 |         | C10C5.3    | 3.147552603 | 1.0575 | 0.335975322 | 0.489403914 |
| WBGene00012457 | acbp-6  | Y17G7B.1   | 3.024577069 | 1.0575 | 0.34963566  | 0.495348337 |
| WBGene00016414 |         | C34F11.2   | 3.212217278 | 1.0575 | 0.329211852 | 0.489403914 |
| WBGene00002144 | inx-22  | Y47G6A.2   | 3.746791418 | 1.055  | 0.281574254 | 0.345525782 |
| WBGene00009631 |         | F42E8.2    | 3.589339384 | 1.055  | 0.293925953 | 0.414186921 |
| WBGene00009884 |         | F49C12.15  | 2.690299971 | 1.055  | 0.392149579 | 0.593984595 |
| WBGene00021398 |         | Y38C1AA.7  | 4.649623247 | 1.055  | 0.226900104 | 0.312483699 |
| WBGene00022558 | fbxb-21 | ZC204.8    | 2.94207076  | 1.055  | 0.358590967 | 0.495348337 |
| WBGene00010373 |         | H08M01.1   | 3.095626603 | 1.0525 | 0.339995786 | 0.489403914 |
| WBGene00018189 | nhr-181 | F38H12.3   | 5.495615017 | 1.0525 | 0.191516327 | 0.312483699 |
| WBGene00018526 |         | F47B3.2    | 3.14865839  | 1.0525 | 0.334269352 | 0.489403914 |
| WBGene00020715 | nspd-4  | T23B7.1    | 2.964068774 | 1.0525 | 0.355086228 | 0.495348337 |
| WBGene00008541 |         | F07A5.2    | 3.496472239 | 1.05   | 0.300302685 | 0.414186921 |
| WBGene00015765 |         | C14C11.1   | 3.641011307 | 1.05   | 0.288381417 | 0.345525782 |

|                |          |             |             |        |             |             |
|----------------|----------|-------------|-------------|--------|-------------|-------------|
| WBGene00009548 |          | F38H4.4     | 2.71190827  | 1.0475 | 0.386259377 | 0.593984595 |
| WBGene00004163 | pqn-82   | Y39A3CR.7   | 3.227052059 | 1.0425 | 0.323050258 | 0.489403914 |
| WBGene00010542 |          | K03H1.7     | 4.1399868   | 1.0425 | 0.251812397 | 0.345525782 |
| WBGene00014104 |          | ZK849.6     | 2.721100879 | 1.0425 | 0.383116998 | 0.593984595 |
| WBGene00010549 |          | K03H4.2     | 3.233780336 | 1.04   | 0.321605023 | 0.489403914 |
| WBGene00013723 |          | Y106G6H.13  | 3.324111818 | 1.04   | 0.312865528 | 0.463367002 |
| WBGene00017112 |          | E03H12.5    | 3.21092907  | 1.0375 | 0.323115204 | 0.489403914 |
| WBGene00009864 |          | F49B2.4     | 3.448364708 | 1.035  | 0.300142267 | 0.414186921 |
| WBGene00009948 |          | F52H3.6     | 3.649772427 | 1.035  | 0.283579325 | 0.345525782 |
| WBGene00010401 |          | H16D19.3    | 2.966443151 | 1.035  | 0.348902692 | 0.495348337 |
| WBGene00014247 |          | ZK1307.4    | 3.708607101 | 1.035  | 0.27908052  | 0.345525782 |
| WBGene00018347 |          | F42C5.5     | 3.286024668 | 1.035  | 0.314970247 | 0.463367002 |
| WBGene00044362 |          | F42G2.7     | 4.331195509 | 1.035  | 0.238964045 | 0.312483699 |
| WBGene00000693 | col-119  | C53B4.5     | 2.738298956 | 1.0325 | 0.377058903 | 0.593984595 |
| WBGene00009016 |          | F21D9.2     | 3.57087035  | 1.0325 | 0.289145194 | 0.414186921 |
| WBGene00014240 | htas-1   | ZK1251.1    | 3.440495235 | 1.0325 | 0.300102145 | 0.414186921 |
| WBGene00019132 | bath-19  | F59H6.1     | 3.279877617 | 1.0325 | 0.314798331 | 0.463367002 |
| WBGene00000865 | cyb-1    | ZC168.4     | 3.952070438 | 1.03   | 0.260622885 | 0.345525782 |
| WBGene00011746 |          | T13F2.6     | 3.71558628  | 1.03   | 0.277210626 | 0.345525782 |
| WBGene00015688 |          | C10G11.8    | 3.19265493  | 1.03   | 0.32261551  | 0.489403914 |
| WBGene00022589 |          | ZC317.6     | 3.207250403 | 1.03   | 0.32114736  | 0.489403914 |
| WBGene00013809 |          | Y116A8C.33  | 2.93332114  | 1.025  | 0.349433271 | 0.495348337 |
| WBGene00016274 |          | C30G12.2    | 9.439283044 | 1.025  | 0.108588756 | 0           |
| WBGene00017055 |          | D2062.1     | 3.273515373 | 1.025  | 0.313119043 | 0.463367002 |
| WBGene00022763 |          | ZK546.7     | 3.459391238 | 1.025  | 0.296294905 | 0.414186921 |
| WBGene00001597 | gld-3    | T07F8.3     | 3.473199462 | 1.0225 | 0.294397143 | 0.414186921 |
| WBGene00012509 |          | Y26D4A.12   | 3.613590751 | 1.0225 | 0.282959546 | 0.414186921 |
| WBGene00022433 |          | Y108F1.5    | 3.917251806 | 1.0225 | 0.261024833 | 0.345525782 |
| WBGene00003864 | oma-1    | C09G9.6     | 4.350864274 | 1.02   | 0.23443618  | 0.312483699 |
| WBGene00009404 |          | F35C11.5    | 3.657171333 | 1.02   | 0.278904078 | 0.345525782 |
| WBGene00011203 |          | R10E4.7     | 3.099316775 | 1.02   | 0.329104791 | 0.489403914 |
| WBGene00014246 |          | ZK1307.3    | 2.971029225 | 1.02   | 0.343315371 | 0.495348337 |
| WBGene00015819 | fbxc-44  | C16A11.6    | 3.476117243 | 1.02   | 0.293430839 | 0.414186921 |
| WBGene00007060 | wht-6    | T26A5.1     | 3.605254176 | 1.0175 | 0.28222698  | 0.414186921 |
| WBGene00007763 |          | C27B7.6     | 3.103303435 | 1.0175 | 0.327876413 | 0.489403914 |
| WBGene00012220 |          | W03C9.2     | 5.233657603 | 1.0175 | 0.194414705 | 0.312483699 |
| WBGene00013829 |          | Y116F11B.14 | 2.874634789 | 1.0175 | 0.353958007 | 0.495348337 |
| WBGene00015193 | clec-117 | B0432.12    | 3.52493043  | 1.0175 | 0.288658179 | 0.414186921 |
| WBGene00020019 |          | R12B2.3     | 3.980657799 | 1.015  | 0.254982983 | 0.345525782 |
| WBGene00008529 |          | F02E9.3     | 3.004232255 | 1.0125 | 0.337024542 | 0.495348337 |
| WBGene00013521 |          | Y73F8A.12   | 3.432844839 | 1.0125 | 0.294944877 | 0.414186921 |
| WBGene00013579 |          | Y79H2A.2    | 4.697688449 | 1.0125 | 0.215531535 | 0.312483699 |
| WBGene00017542 |          | F17E9.5     | 2.815975487 | 1.0125 | 0.359555687 | 0.495348337 |
| WBGene00014121 |          | ZK858.8     | 3.186909802 | 1.0075 | 0.316136967 | 0.489403914 |
| WBGene00016291 |          | C31H1.8     | 3.647785803 | 1.0075 | 0.276194945 | 0.345525782 |
| WBGene00021787 |          | Y51H7C.9    | 4.684223911 | 1.0075 | 0.215083655 | 0.312483699 |
| WBGene00044261 |          | Y87G2A.20   | 3.392917354 | 1.0075 | 0.296942099 | 0.463367002 |
| WBGene00000417 | ced-3    | C48D1.2     | 3.461853476 | 1.005  | 0.290306914 | 0.414186921 |
| WBGene00001046 | dj-28    | Y54E10BL.4  | 5.072023521 | 1.005  | 0.198145769 | 0.312483699 |
| WBGene00018949 | acbp-4   | F56C9.5     | 3.867313111 | 1.005  | 0.259870347 | 0.345525782 |
| WBGene00012926 |          | Y47D3A.13   | 4.86501454  | 1.0025 | 0.206063105 | 0.312483699 |
| WBGene00013165 |          | Y53F4B.19   | 2.803287019 | 1.0025 | 0.357615896 | 0.495348337 |
| WBGene00013523 |          | Y73F8A.14   | 3.236511325 | 1.0025 | 0.309747101 | 0.489403914 |
| WBGene00045245 | ttr-34   | F09A5.9     | 3.696413004 | 1.0025 | 0.271208872 | 0.345525782 |
| WBGene00016410 |          | C34E10.9    | 3.137929715 | 1      | 0.318681453 | 0.489403914 |
| WBGene00004394 | rol-1    | Y57A10A.11  | 3.555391594 | 0.9975 | 0.280559813 | 0.414186921 |
| WBGene00010046 |          | F54D1.1     | 2.806895661 | 0.9975 | 0.355374806 | 0.495348337 |
| WBGene00011834 | dvc-1    | T19B10.6    | 4.339249216 | 0.9975 | 0.229878477 | 0.312483699 |
| WBGene00017325 |          | F10C1.3     | 4.231364172 | 0.9975 | 0.235739577 | 0.312483699 |
| WBGene00044370 |          | C41H7.9     | 3.448931313 | 0.9975 | 0.289220025 | 0.414186921 |
| A_12_P173977   |          |             | 5.307777434 | 0.995  | 0.187460762 | 0.312483699 |
| WBGene00000596 | col-7    | C15A11.5    | 3.527402261 | 0.995  | 0.28207727  | 0.414186921 |
| WBGene00003229 | mex-3    | F53G12.5    | 4.655212123 | 0.995  | 0.213738918 | 0.312483699 |
| WBGene00007792 |          | C28D4.4     | 3.669240891 | 0.995  | 0.271173256 | 0.345525782 |
| WBGene00011376 | gla-3    | T02E1.3     | 4.38921125  | 0.995  | 0.22669221  | 0.312483699 |
| WBGene00017436 |          | F13H8.3     | 4.531693364 | 0.995  | 0.219564723 | 0.312483699 |
| WBGene00012595 |          | Y38E10A.17  | 3.237378989 | 0.9925 | 0.306575166 | 0.489403914 |
| WBGene00013611 |          | Y102A5C.2   | 3.379703921 | 0.9925 | 0.293664778 | 0.463367002 |
| WBGene00018806 |          | F54D10.5    | 4.491628309 | 0.9925 | 0.220966637 | 0.312483699 |
| WBGene00005031 | sra-5    | AH6.9       | 3.786149508 | 0.99   | 0.261479373 | 0.345525782 |



|                |          |            |             |        |             |             |
|----------------|----------|------------|-------------|--------|-------------|-------------|
| WBGene00008243 |          | C50H2.7    | 3.565196122 | 0.99   | 0.277684583 | 0.414186921 |
| WBGene00018636 |          | F49E8.2    | 4.430299478 | 0.99   | 0.223461191 | 0.312483699 |
| A_12_P178359   |          |            | 3.095378358 | 0.9875 | 0.319024005 | 0.489403914 |
| WBGene00001399 | fat-7    | F10D2.9    | 3.538467443 | 0.9875 | 0.279075621 | 0.414186921 |
| WBGene00002368 | let-99   | K08E7.3    | 4.670116613 | 0.9875 | 0.211450823 | 0.312483699 |
| WBGene00017460 | bath-30  | F14D2.12   | 3.666532469 | 0.9875 | 0.269328039 | 0.345525782 |
| WBGene00020416 |          | T10E9.6    | 2.951458571 | 0.9875 | 0.334580336 | 0.495348337 |
| WBGene00022822 |          | ZK813.3    | 4.362262627 | 0.9875 | 0.226373349 | 0.312483699 |
| WBGene00077450 |          | K06B4.15   | 3.784407148 | 0.9875 | 0.260939154 | 0.345525782 |
| WBGene00001599 | glh-2    | C55B7.1    | 3.688292291 | 0.985  | 0.267061264 | 0.345525782 |
| WBGene00011378 |          | T02E1.6    | 3.28646702  | 0.985  | 0.299713946 | 0.463367002 |
| WBGene00013610 | fbxa-206 | Y102A5C.1  | 3.949165992 | 0.985  | 0.249419751 | 0.345525782 |
| WBGene00013647 |          | Y105C5B.5  | 3.369305121 | 0.985  | 0.292345147 | 0.463367002 |
| WBGene00007624 | hrde-1   | C16C10.3   | 3.11805625  | 0.9825 | 0.315100153 | 0.489403914 |
| WBGene00011214 |          | R10E9.2    | 4.473792305 | 0.9825 | 0.219612341 | 0.312483699 |
| WBGene00015094 |          | B0261.6    | 4.177345578 | 0.9825 | 0.235197204 | 0.312483699 |
| WBGene00009160 |          | F26E4.5    | 2.71431965  | 0.98   | 0.361048118 | 0.593984595 |
| WBGene00021428 |          | Y38F2AR.10 | 3.789708157 | 0.98   | 0.258595111 | 0.345525782 |
| WBGene00008710 |          | F11E6.7    | 4.517772254 | 0.9775 | 0.216367702 | 0.312483699 |
| WBGene00011425 |          | T04B2.7    | 3.099881352 | 0.9775 | 0.31533465  | 0.489403914 |
| WBGene00011691 |          | T10C6.10   | 4.90226736  | 0.9775 | 0.199397529 | 0.312483699 |
| WBGene00018809 |          | F54D10.8   | 3.528528388 | 0.9775 | 0.277027671 | 0.414186921 |
| WBGene00045399 |          | Y47G6A.33  | 3.573834172 | 0.9775 | 0.273515768 | 0.414186921 |
| WBGene00001424 | fis-1    | F41G3.4    | 3.03117917  | 0.9725 | 0.320832239 | 0.495348337 |
| WBGene00008623 |          | F09E8.1    | 4.648845272 | 0.9725 | 0.209191733 | 0.312483699 |
| WBGene00009652 |          | F43D2.3    | 3.731829267 | 0.9725 | 0.260596059 | 0.345525782 |
| WBGene00012527 | set-22   | Y32F6A.1   | 4.278324514 | 0.9725 | 0.22730861  | 0.312483699 |
| WBGene00014007 |          | ZK596.2    | 2.840562032 | 0.9725 | 0.342361825 | 0.495348337 |
| WBGene00015820 |          | C16A11.7   | 2.936550269 | 0.9725 | 0.331170902 | 0.495348337 |
| WBGene00016576 |          | C41H7.6    | 3.620796704 | 0.9725 | 0.268587297 | 0.414186921 |
| WBGene00021537 |          | Y42H9AR.2  | 3.099210433 | 0.9725 | 0.313789599 | 0.489403914 |
| WBGene00015842 |          | C16C8.4    | 8.093895999 | 0.97   | 0.119843398 | 0           |
| WBGene00020843 |          | T27A3.7    | 3.16269002  | 0.97   | 0.306700939 | 0.489403914 |
| WBGene00022532 |          | ZC155.4    | 5.099398092 | 0.97   | 0.190218528 | 0.312483699 |
| WBGene00009031 |          | F21H7.5    | 3.07569229  | 0.9675 | 0.314563327 | 0.489403914 |
| WBGene00009714 |          | F44G4.5    | 2.985603597 | 0.9675 | 0.324055076 | 0.495348337 |
| WBGene00010061 |          | F54E12.2   | 3.683670661 | 0.9675 | 0.26264563  | 0.345525782 |
| WBGene00012925 | wht-8    | Y47D3A.11  | 3.155864047 | 0.965  | 0.305779966 | 0.489403914 |
| WBGene00016707 |          | C46E10.1   | 3.479357337 | 0.9625 | 0.276631546 | 0.414186921 |
| WBGene00020905 |          | T28H11.7   | 2.784732589 | 0.9625 | 0.345634624 | 0.495348337 |
| WBGene00010637 |          | K07F5.12   | 5.940980269 | 0.96   | 0.161589495 | 0.300971142 |
| WBGene00011162 | chil-19  | R09D1.6    | 3.90032016  | 0.96   | 0.24613364  | 0.345525782 |
| WBGene00015034 |          | B0207.11   | 2.809603811 | 0.96   | 0.341685186 | 0.495348337 |
| WBGene00016564 |          | C41D11.5   | 3.77775694  | 0.96   | 0.254119049 | 0.345525782 |
| WBGene00018773 |          | F53G12.8   | 2.674487143 | 0.96   | 0.358947323 | 0.593984595 |
| WBGene00015505 |          | C06A5.8    | 3.559490737 | 0.9575 | 0.268999155 | 0.414186921 |
| WBGene00017555 | nep-10   | F18A12.6   | 2.693464175 | 0.9575 | 0.355490156 | 0.593984595 |
| WBGene00018792 |          | F54C1.8    | 3.083062859 | 0.9575 | 0.310567784 | 0.489403914 |
| WBGene00020940 |          | W02D7.4    | 2.758623102 | 0.9575 | 0.347093446 | 0.495348337 |
| WBGene00000751 | col-178  | C34F6.2    | 4.969061697 | 0.955  | 0.192189202 | 0.312483699 |
| WBGene00002068 | ify-1    | C27A2.3    | 4.619650214 | 0.955  | 0.206725608 | 0.312483699 |
| WBGene00007337 |          | C05C12.5   | 4.305022907 | 0.955  | 0.221833895 | 0.312483699 |
| WBGene00009463 |          | F36D1.4    | 3.248712752 | 0.955  | 0.293962585 | 0.463367002 |
| WBGene00011945 | hpo-24   | T23D8.7    | 4.262053344 | 0.955  | 0.224070401 | 0.312483699 |
| WBGene00015032 |          | B0207.9    | 2.703574289 | 0.955  | 0.353236086 | 0.593984595 |
| WBGene00018991 |          | F56F11.4   | 5.848755813 | 0.955  | 0.16328259  | 0.300971142 |
| WBGene00010064 |          | F54F7.2    | 4.007196349 | 0.9525 | 0.237697362 | 0.345525782 |
| WBGene00012786 |          | Y43C5B.3   | 3.432895736 | 0.9525 | 0.277462549 | 0.414186921 |
| WBGene00004965 | spe-11   | F48C1.7    | 3.349805983 | 0.95   | 0.283598514 | 0.463367002 |
| WBGene00008865 |          | F15G9.1    | 3.254722865 | 0.95   | 0.29188353  | 0.463367002 |
| WBGene00012297 |          | W06D4.3    | 3.321202846 | 0.95   | 0.286040945 | 0.463367002 |
| WBGene00008802 | acp-2    | F14E5.4    | 4.754805115 | 0.9475 | 0.1992721   | 0.312483699 |
| WBGene00013194 |          | Y54E2A.9   | 3.053886825 | 0.9475 | 0.310260352 | 0.495348337 |
| WBGene00023451 |          | K08E3.10   | 3.760037829 | 0.9475 | 0.251992146 | 0.345525782 |
| A_12_P173631   |          |            | 4.239514436 | 0.945  | 0.222902885 | 0.312483699 |
| WBGene00007766 |          | C27C7.1    | 3.917589677 | 0.945  | 0.241219749 | 0.345525782 |
| WBGene00011911 |          | T22B3.3    | 3.890041123 | 0.945  | 0.242928023 | 0.345525782 |
| WBGene00014032 |          | ZK637.15   | 3.305258144 | 0.945  | 0.285908077 | 0.463367002 |
| WBGene00018010 |          | F33E11.2   | 4.630384247 | 0.945  | 0.204086734 | 0.312483699 |
| WBGene00012223 |          | W03C9.8    | 3.022503209 | 0.9425 | 0.311827626 | 0.495348337 |

|                |          |            |             |        |             |             |
|----------------|----------|------------|-------------|--------|-------------|-------------|
| WBGene00013800 |          | Y116A8C.23 | 3.015942714 | 0.9425 | 0.312505936 | 0.495348337 |
| WBGene00018011 |          | F3E11.3    | 3.080572185 | 0.9425 | 0.305949656 | 0.489403914 |
| WBGene00004798 | sip-1    | F43D9.4    | 3.15577366  | 0.94   | 0.297866736 | 0.489403914 |
| WBGene00010544 |          | K03H1.9    | 3.532182757 | 0.94   | 0.266124395 | 0.414186921 |
| WBGene00016512 |          | C38C3.3    | 3.067652019 | 0.94   | 0.306423282 | 0.495348337 |
| WBGene00022617 |          | ZC477.2    | 3.564236679 | 0.94   | 0.263731083 | 0.414186921 |
| WBGene00020987 |          | W03D8.5    | 2.916436654 | 0.9375 | 0.321453922 | 0.495348337 |
| WBGene00006376 | syp-2    | C24G6.1    | 2.955045368 | 0.935  | 0.316408002 | 0.495348337 |
| WBGene00007190 | rmd-3    | B0491.3    | 3.641154739 | 0.935  | 0.25678667  | 0.345525782 |
| WBGene00010181 |          | F57A8.6    | 3.270716314 | 0.935  | 0.2858701   | 0.463367002 |
| WBGene00021465 |          | Y39G10AR.7 | 4.130226023 | 0.935  | 0.226379863 | 0.345525782 |
| WBGene00005012 |          | F26F4.2    | 2.890865292 | 0.93   | 0.321702987 | 0.495348337 |
| WBGene00008299 |          | C54D10.4   | 2.939088145 | 0.93   | 0.316424671 | 0.495348337 |
| WBGene00011491 |          | T05F1.5    | 3.087004838 | 0.93   | 0.30126289  | 0.489403914 |
| WBGene00012637 |          | Y38H8A.3   | 3.420061249 | 0.93   | 0.271924955 | 0.463367002 |
| WBGene00019255 |          | H32C10.1   | 3.145896977 | 0.93   | 0.295623158 | 0.489403914 |
| A_12_P173627   |          |            | 4.842929148 | 0.9275 | 0.191516327 | 0.312483699 |
| WBGene00016825 |          | C50E10.1   | 2.979272036 | 0.9275 | 0.31131766  | 0.495348337 |
| WBGene00077519 |          | T27C10.8   | 4.400750928 | 0.9275 | 0.210759485 | 0.312483699 |
| WBGene00013371 |          | Y60A9A.1   | 2.740572407 | 0.925  | 0.33752073  | 0.593984595 |
| WBGene00015106 |          | B0280.11   | 2.84958668  | 0.925  | 0.32460848  | 0.495348337 |
| WBGene00044684 |          | T08G11.2   | 2.829972156 | 0.925  | 0.32685834  | 0.495348337 |
| A_12_P173630   |          |            | 4.349739509 | 0.9225 | 0.212081666 | 0.312483699 |
| WBGene00017209 |          | F07E5.4    | 2.799182633 | 0.9225 | 0.32956049  | 0.495348337 |
| WBGene00018332 |          | F42A9.3    | 3.311142136 | 0.9225 | 0.278604772 | 0.463367002 |
| WBGene00002130 | inx-8    | ZK792.2    | 3.974537102 | 0.9175 | 0.230844492 | 0.345525782 |
| WBGene00009308 |          | F32A11.3   | 2.781072744 | 0.9175 | 0.329908666 | 0.495348337 |
| WBGene00010883 |          | M7.7       | 2.8464196   | 0.9175 | 0.322334767 | 0.495348337 |
| WBGene00017910 |          | F28H1.5    | 3.294589484 | 0.9175 | 0.278486896 | 0.463367002 |
| WBGene00001605 | gln-4    | T25C8.3    | 3.345266622 | 0.915  | 0.273520799 | 0.463367002 |
| WBGene00001977 | hmg-12   | Y17G7A.1   | 5.273843554 | 0.9125 | 0.173023714 | 0.312483699 |
| WBGene00008660 | clec-153 | F10F2.8    | 3.185300233 | 0.9125 | 0.286472211 | 0.489403914 |
| WBGene00016843 |          | C50F7.3    | 3.248822817 | 0.9125 | 0.280870965 | 0.463367002 |
| WBGene00000913 | daf-18   | T07A9.6    | 4.034222145 | 0.91   | 0.225570127 | 0.345525782 |
| WBGene00008382 |          | D1081.4    | 2.972444754 | 0.91   | 0.306145303 | 0.495348337 |
| WBGene00018930 |          | F56B3.6    | 3.721124329 | 0.91   | 0.244549743 | 0.345525782 |
| WBGene00021189 |          | Y13C8A.2   | 3.536871606 | 0.91   | 0.257289521 | 0.414186921 |
| WBGene00000710 | col-137  | Y51H4A.9   | 6.659852147 | 0.9075 | 0.136264286 | 0.300971142 |
| WBGene00007508 |          | C10C5.4    | 4.424568635 | 0.9075 | 0.20510474  | 0.312483699 |
| WBGene00019561 |          | K09C6.7    | 2.824834446 | 0.9075 | 0.321257765 | 0.495348337 |
| WBGene00050915 |          | Y6E2A.10   | 2.707830064 | 0.9075 | 0.3351392   | 0.593984595 |
| WBGene00007249 |          | C01G12.9   | 3.132298246 | 0.905  | 0.288925233 | 0.489403914 |
| WBGene00008423 |          | D2045.5    | 2.928834214 | 0.905  | 0.308996664 | 0.495348337 |
| WBGene00011795 |          | T16A9.5    | 2.880351262 | 0.905  | 0.31419779  | 0.495348337 |
| WBGene00013148 |          | Y53F4A.2   | 2.85722242  | 0.905  | 0.31674118  | 0.495348337 |
| WBGene00016669 | ilys-2   | C45G7.2    | 5.786012224 | 0.905  | 0.156411699 | 0.312483699 |
| WBGene00019562 |          | K09C6.8    | 2.804772605 | 0.905  | 0.322664304 | 0.495348337 |
| WBGene00004904 | snf-5    | Y46G5A.30  | 3.321718801 | 0.9025 | 0.271696689 | 0.463367002 |
| WBGene00007631 | wht-3    | C16C10.12  | 2.837467297 | 0.9025 | 0.31806534  | 0.495348337 |
| WBGene00021366 |          | Y37E11AM.2 | 3.373151316 | 0.9025 | 0.267553962 | 0.463367002 |
| WBGene00007985 | swah-1   | C36F7.2    | 2.924553265 | 0.9    | 0.307739309 | 0.495348337 |
| WBGene00016161 |          | C27D6.3    | 3.135610374 | 0.9    | 0.287025457 | 0.489403914 |
| WBGene00013473 |          | Y69E1A.1   | 3.435553108 | 0.8975 | 0.261238867 | 0.414186921 |
| WBGene00019087 |          | F59A6.5    | 3.044824787 | 0.8975 | 0.294762445 | 0.495348337 |
| WBGene00022858 |          | ZK1193.2   | 3.119775749 | 0.8975 | 0.287680934 | 0.489403914 |
| WBGene00007239 |          | C01G10.14  | 2.748981747 | 0.895  | 0.325575097 | 0.593984595 |
| WBGene00007445 |          | C08F8.3    | 3.547197053 | 0.895  | 0.252311892 | 0.414186921 |
| WBGene00013700 |          | Y106G6D.3  | 3.370234475 | 0.895  | 0.265560158 | 0.463367002 |
| WBGene00016336 |          | C33C12.4   | 3.106159101 | 0.895  | 0.288137204 | 0.489403914 |
| WBGene00017358 |          | F10E9.7    | 3.252601705 | 0.895  | 0.27516434  | 0.463367002 |
| WBGene00017922 |          | F29B9.7    | 3.208762938 | 0.895  | 0.27892369  | 0.489403914 |
| A_12_P154290   |          |            | 4.234684855 | 0.8925 | 0.210759485 | 0.312483699 |
| WBGene00010574 |          | K04H4.5    | 2.797016643 | 0.8925 | 0.319089986 | 0.495348337 |
| WBGene00011597 | zim-1    | T07G12.6   | 3.230483957 | 0.8925 | 0.276274395 | 0.489403914 |
| WBGene00012636 |          | Y38H8A.2   | 2.921762883 | 0.89   | 0.304610619 | 0.495348337 |
| WBGene00018500 |          | F46F5.9    | 3.427912528 | 0.89   | 0.259633229 | 0.463367002 |
| WBGene00022452 |          | Y110A2AR.1 | 5.268531908 | 0.89   | 0.168927514 | 0.312483699 |
| WBGene00014106 |          | ZK856.5    | 2.932370193 | 0.8875 | 0.302656193 | 0.495348337 |
| WBGene00015661 |          | C09H5.7    | 4.385463946 | 0.8875 | 0.202373115 | 0.312483699 |
| WBGene00016586 |          | C42C1.8    | 3.664857932 | 0.8875 | 0.242164912 | 0.345525782 |

|                |         |            |             |        |             |             |
|----------------|---------|------------|-------------|--------|-------------|-------------|
| WBGene00018833 | ztf-1   | F54F2.5    | 2.71820632  | 0.8875 | 0.326502074 | 0.593984595 |
| WBGene00006057 | sss-2   | F47B8.11   | 3.43011694  | 0.885  | 0.258008696 | 0.414186921 |
| WBGene00007171 |         | B0393.6    | 4.60961011  | 0.885  | 0.191990207 | 0.312483699 |
| WBGene00009270 |         | F30F8.1    | 4.601665062 | 0.885  | 0.19232169  | 0.312483699 |
| WBGene00015677 | cpg-4   | C10F3.1    | 3.097046426 | 0.885  | 0.28575613  | 0.489403914 |
| WBGene00018099 | ztf-28  | F36F12.8   | 3.363514878 | 0.885  | 0.263117611 | 0.463367002 |
| WBGene00020404 |         | T10B11.8   | 3.17201891  | 0.885  | 0.27900212  | 0.489403914 |
| WBGene00020467 |         | T12F5.2    | 3.707235801 | 0.885  | 0.238722339 | 0.345525782 |
| WBGene00010612 |         | K07A1.5    | 3.38702514  | 0.8825 | 0.26055313  | 0.463367002 |
| WBGene00013656 |         | Y105C5B.17 | 3.123925186 | 0.8825 | 0.282497162 | 0.489403914 |
| WBGene00019406 | acdH-8  | K05F1.3    | 2.764820245 | 0.8825 | 0.319188924 | 0.495348337 |
| WBGene00044005 |         | F37C12.18  | 3.44797337  | 0.8825 | 0.255947452 | 0.414186921 |
| A_12_P173628   |         |            | 3.586127858 | 0.88   | 0.245390024 | 0.414186921 |
| WBGene00017630 |         | F20B6.6    | 2.814840922 | 0.88   | 0.312628679 | 0.495348337 |
| WBGene00020978 |         | W03B1.9    | 3.387146529 | 0.88   | 0.259805707 | 0.463367002 |
| WBGene00013190 |         | Y54E2A.5   | 2.68626078  | 0.8775 | 0.326662253 | 0.593984595 |
| WBGene00016799 |         | C50C3.1    | 4.143152246 | 0.8775 | 0.211795258 | 0.312483699 |
| WBGene00020982 | ilys-6  | W03D2.7    | 4.541055473 | 0.8775 | 0.193237014 | 0.312483699 |
| WBGene00022035 |         | Y65B4BL.3  | 4.492552811 | 0.8775 | 0.195323246 | 0.312483699 |
| WBGene00044243 |         | F16C3.4    | 2.921921777 | 0.8775 | 0.300316048 | 0.495348337 |
| WBGene00044777 |         | T02B11.9   | 2.800372213 | 0.8775 | 0.313351202 | 0.495348337 |
| A_12_P111814   |         |            | 3.759950354 | 0.875  | 0.232715839 | 0.345525782 |
| WBGene00001603 | gln-2   | K03H1.1    | 2.961489177 | 0.875  | 0.295459462 | 0.495348337 |
| WBGene00013556 |         | Y75B8A.23  | 3.116118181 | 0.875  | 0.280798079 | 0.489403914 |
| WBGene00015689 |         | C10G11.9   | 2.741287792 | 0.875  | 0.319193046 | 0.593984595 |
| WBGene00005421 | srh-211 | D1065.5    | 2.709827023 | 0.8725 | 0.321976271 | 0.593984595 |
| WBGene00011252 |         | R11H6.4    | 3.200326352 | 0.8725 | 0.272628446 | 0.489403914 |
| WBGene00016573 |         | C41H7.3    | 4.229243525 | 0.8725 | 0.20630167  | 0.312483699 |
| WBGene00020661 |         | T21G5.4    | 2.906652632 | 0.8725 | 0.300173468 | 0.495348337 |
| WBGene00022244 |         | Y73B6BL.23 | 3.657190674 | 0.8725 | 0.238571099 | 0.345525782 |
| A_12_P177537   |         |            | 4.080667546 | 0.87   | 0.213200411 | 0.345525782 |
| WBGene00011988 | har-2   | T24D1.5    | 4.086114786 | 0.87   | 0.212916192 | 0.345525782 |
| WBGene00015467 | basl-1  | C05D2.3    | 3.074383089 | 0.87   | 0.282983602 | 0.489403914 |
| WBGene00021113 | gsp-3   | W09C3.6    | 4.224915799 | 0.87   | 0.205921264 | 0.312483699 |
| WBGene00044638 |         | F23A7.8    | 3.453951117 | 0.87   | 0.251885441 | 0.414186921 |
| WBGene00015093 |         | B0261.5    | 2.97873468  | 0.8675 | 0.29123104  | 0.495348337 |
| WBGene00015384 |         |            | 2.927154725 | 0.8675 | 0.296362878 | 0.495348337 |
| WBGene00016169 |         | C27F2.7    | 3.432796654 | 0.8675 | 0.252709405 | 0.414186921 |
| WBGene00016949 |         | C55C2.3    | 2.981392986 | 0.8675 | 0.290971369 | 0.495348337 |
| WBGene00021541 |         | Y42H9B.3   | 3.59781763  | 0.8675 | 0.241118392 | 0.414186921 |
| WBGene00000696 | col-122 | T05A1.2    | 3.304054092 | 0.865  | 0.261799588 | 0.463367002 |
| WBGene00012481 |         | Y18D10A.11 | 3.56488665  | 0.865  | 0.242644461 | 0.414186921 |
| WBGene00019410 |         | K05F1.9    | 3.440554587 | 0.865  | 0.251412956 | 0.414186921 |
| WBGene00044127 |         | BE10.5     | 2.805944882 | 0.865  | 0.308274053 | 0.495348337 |
| A_12_P177536   |         |            | 3.554670125 | 0.8625 | 0.242638549 | 0.414186921 |
| WBGene00007168 |         | B0393.3    | 4.471044791 | 0.8625 | 0.192907931 | 0.312483699 |
| WBGene00009203 |         | F28C6.2    | 4.062448447 | 0.8625 | 0.212310386 | 0.345525782 |
| WBGene00010081 |         | F55A11.8   | 4.947090297 | 0.8625 | 0.174344907 | 0.312483699 |
| WBGene00014174 |         | ZK970.8    | 3.115633889 | 0.8625 | 0.276829702 | 0.489403914 |
| WBGene00016670 | ilys-3  | C45G7.3    | 4.94271381  | 0.8625 | 0.17449928  | 0.312483699 |
| WBGene00020219 |         | T05A7.1    | 2.993805067 | 0.8625 | 0.28809491  | 0.495348337 |
| WBGene00020986 |         | W03D8.3    | 3.40638569  | 0.8625 | 0.253200923 | 0.463367002 |
| WBGene00001482 | fog-2   | Y113G7B.5  | 3.054046434 | 0.86   | 0.281593623 | 0.495348337 |
| WBGene00002136 | inx-14  | F07A5.1    | 5.474086518 | 0.86   | 0.157103838 | 0.312483699 |
| WBGene00009590 | ttr-4   | F40F12.1   | 3.020227026 | 0.86   | 0.284746806 | 0.495348337 |
| WBGene00011066 | ztf-15  | R06C7.9    | 4.32576966  | 0.86   | 0.198808551 | 0.312483699 |
| WBGene00015097 |         | B0273.1    | 2.917739191 | 0.86   | 0.294748757 | 0.495348337 |
| WBGene00017450 | bath-27 | F14D2.1    | 3.257768554 | 0.86   | 0.263984376 | 0.463367002 |
| WBGene00009670 |         | F43G9.8    | 3.389028826 | 0.8575 | 0.253022339 | 0.463367002 |
| WBGene00015134 |         | B0304.2    | 3.410799597 | 0.8575 | 0.251407324 | 0.463367002 |
| WBGene00001595 | gld-1   | T23G11.3   | 3.609511418 | 0.855  | 0.236874164 | 0.414186921 |
| WBGene00016054 |         | C24D10.2   | 2.740370374 | 0.855  | 0.312001621 | 0.593984595 |
| WBGene00018083 |         | F36A4.4    | 3.555048912 | 0.855  | 0.24050302  | 0.414186921 |
| WBGene00019082 | pup-3   | F59A3.9    | 7.004707888 | 0.855  | 0.122060765 | 0.300971142 |
| WBGene00022030 |         | Y65B4A.7   | 3.21353934  | 0.855  | 0.266061781 | 0.489403914 |
| WBGene00077543 |         | F27D4.8    | 4.279687905 | 0.855  | 0.199780923 | 0.312483699 |
| WBGene00003499 | mut-2   | K04F10.6   | 3.196194343 | 0.8525 | 0.266723456 | 0.489403914 |
| WBGene00004985 | spo-11  | T05E11.4   | 3.196194343 | 0.8525 | 0.266723456 | 0.489403914 |
| WBGene00006049 | ssp-32  | F32B6.7    | 4.10399156  | 0.8525 | 0.207724599 | 0.345525782 |
| WBGene00010829 |         | M02B1.4    | 2.997356434 | 0.8525 | 0.284417292 | 0.495348337 |

|                |          |            |             |        |             |             |
|----------------|----------|------------|-------------|--------|-------------|-------------|
| WBGene00013429 |          | Y66D12A.3  | 2.882896836 | 0.8525 | 0.295709506 | 0.495348337 |
| WBGene00013437 |          | Y66D12A.11 | 3.108603018 | 0.8525 | 0.274238941 | 0.489403914 |
| WBGene00019015 |          | F57F4.1    | 3.273504249 | 0.8525 | 0.260424284 | 0.463367002 |
| WBGene00022673 |          | ZK177.8    | 3.949198932 | 0.8525 | 0.215866563 | 0.345525782 |
| WBGene00008659 | clec-151 | F10F2.7    | 3.627255827 | 0.85   | 0.234336931 | 0.414186921 |
| WBGene00010609 | dut-1    | K07A1.2    | 3.357239674 | 0.85   | 0.253184188 | 0.463367002 |
| WBGene00015051 |          | B0218.7    | 3.062332585 | 0.85   | 0.277566194 | 0.495348337 |
| WBGene00020353 |          | T08B6.4    | 2.679779572 | 0.85   | 0.317190268 | 0.593984595 |
| WBGene00006039 | ssp-10   | K07F5.9    | 4.118789806 | 0.8475 | 0.205764324 | 0.345525782 |
| WBGene00006311 | sun-1    | F57B1.2    | 3.489450886 | 0.8475 | 0.24287489  | 0.414186921 |
| WBGene00007977 | gska-3   | C36B1.10   | 2.747066999 | 0.8475 | 0.308510859 | 0.593984595 |
| WBGene00008772 | irld-4   | F13G11.2   | 4.158977093 | 0.8475 | 0.203776068 | 0.312483699 |
| WBGene00015165 |          | B0361.11   | 3.325553453 | 0.8475 | 0.254844799 | 0.463367002 |
| WBGene00015291 |          | C01B12.8   | 3.207151992 | 0.8475 | 0.264253145 | 0.489403914 |
| WBGene00018950 |          | F56C9.6    | 2.956058306 | 0.8475 | 0.286699352 | 0.495348337 |
| WBGene00020834 |          | T27A1.2    | 3.02200432  | 0.8475 | 0.280443014 | 0.495348337 |
| WBGene00045479 |          |            | 3.048399556 | 0.8475 | 0.278014737 | 0.495348337 |
| WBGene00001372 | exo-3    | R09B3.1    | 3.287867845 | 0.845  | 0.257005464 | 0.463367002 |
| WBGene00012784 |          | Y43C5A.4   | 3.570983498 | 0.845  | 0.236629489 | 0.414186921 |
| WBGene00019254 |          | H31G24.3   | 3.078049471 | 0.845  | 0.274524503 | 0.489403914 |
| WBGene00000797 | crn-4    | AH9.2      | 3.082075918 | 0.8425 | 0.27335472  | 0.489403914 |
| WBGene00002073 | ima-2    | F26B1.3    | 5.629348719 | 0.8425 | 0.149662073 | 0.312483699 |
| WBGene00009550 |          | F38H4.6    | 2.884097886 | 0.8425 | 0.292119073 | 0.495348337 |
| WBGene00011805 |          | T16G12.4   | 3.20050874  | 0.8425 | 0.2632394   | 0.489403914 |
| WBGene00013170 |          | Y53F4B.24  | 2.970196393 | 0.8425 | 0.283651277 | 0.495348337 |
| WBGene00013381 | cyp-31A5 | Y62E10A.15 | 4.013995338 | 0.8425 | 0.209890627 | 0.345525782 |
| WBGene00013707 |          | Y106G6E.3  | 2.952296758 | 0.8425 | 0.285371041 | 0.495348337 |
| WBGene00022043 |          | Y65B4BR.8  | 2.879733632 | 0.8425 | 0.292561781 | 0.495348337 |
| WBGene00007080 | sfxn-1.1 | AH6.2      | 3.462867967 | 0.84   | 0.242573499 | 0.414186921 |
| WBGene00017057 |          | D2062.5    | 3.351650528 | 0.84   | 0.250622788 | 0.463367002 |
| WBGene00017808 | nspd-9   | F26A1.10   | 2.861968705 | 0.84   | 0.293504258 | 0.495348337 |
| WBGene00044439 |          | Y51H7C.15  | 2.700091196 | 0.84   | 0.311100603 | 0.593984595 |
| WBGene00013538 | tag-349  | Y73F8A.34  | 4.316490783 | 0.8375 | 0.19402335  | 0.312483699 |
| WBGene00021200 | cyp-31A3 | Y17G9B.3   | 4.621165562 | 0.8375 | 0.181231334 | 0.312483699 |
| A_12_P136854   |          |            | 3.543431974 | 0.835  | 0.23564725  | 0.414186921 |
| A_12_P177538   |          |            | 3.223854803 | 0.835  | 0.259006702 | 0.489403914 |
| WBGene00002214 | klc-1    | M7.2       | 5.276601153 | 0.835  | 0.158245806 | 0.312483699 |
| WBGene00004819 | skr-13   | C52D10.8   | 4.20602132  | 0.835  | 0.198524909 | 0.312483699 |
| WBGene00011132 |          | R08A2.1    | 2.953313305 | 0.835  | 0.282733294 | 0.495348337 |
| WBGene00016416 |          | C34F11.5   | 2.698995865 | 0.835  | 0.309374316 | 0.593984595 |
| WBGene00016541 |          | C39H7.1    | 3.15626615  | 0.835  | 0.264553102 | 0.489403914 |
| WBGene00019139 | bath-1   | F59H6.9    | 2.736651017 | 0.835  | 0.305117457 | 0.593984595 |
| WBGene00022775 |          | ZK616.5    | 3.148767657 | 0.835  | 0.26518311  | 0.489403914 |
| A_12_P173978   |          |            | 3.912735321 | 0.8325 | 0.212766756 | 0.345525782 |
| WBGene00007710 | rsa-1    | C25A1.9    | 2.949349847 | 0.8325 | 0.282265599 | 0.495348337 |
| WBGene00010440 | ttr-51   | JC8.8      | 5.126003884 | 0.8325 | 0.162407212 | 0.312483699 |
| WBGene00044122 |          | T28B8.6    | 3.829963655 | 0.8325 | 0.217364987 | 0.345525782 |
| WBGene00009458 |          | F36A2.11   | 2.999682317 | 0.83   | 0.276695967 | 0.495348337 |
| WBGene00015026 |          | B0207.1    | 3.877602566 | 0.83   | 0.214049786 | 0.345525782 |
| WBGene00018954 |          | F56C9.11   | 3.006151095 | 0.83   | 0.27610056  | 0.495348337 |
| WBGene00022849 | acs-6    | ZK1127.2   | 3.320156657 | 0.83   | 0.249988204 | 0.463367002 |
| WBGene00001855 | hil-4    | C18G1.5    | 4.491391244 | 0.8275 | 0.184241353 | 0.312483699 |
| WBGene00008871 | tag-314  | F15H10.4   | 3.185402744 | 0.8275 | 0.259778768 | 0.489403914 |
| WBGene00016263 |          | C30F12.4   | 3.074807381 | 0.8275 | 0.269122549 | 0.489403914 |
| WBGene00016322 |          | C32E8.4    | 3.109265266 | 0.8275 | 0.266140046 | 0.489403914 |
| WBGene00017801 |          | F26A1.1    | 3.465755753 | 0.8275 | 0.238764662 | 0.414186921 |
| WBGene00018660 |          | F52C6.3    | 4.878944319 | 0.8275 | 0.169606363 | 0.312483699 |
| WBGene00021633 |          | Y47G6A.3   | 2.806303138 | 0.8275 | 0.294871922 | 0.495348337 |
| WBGene00044979 |          | Y41E3.19   | 3.166562156 | 0.8275 | 0.261324414 | 0.489403914 |
| A_12_P172784   |          |            | 5.169247853 | 0.825  | 0.159597687 | 0.312483699 |
| WBGene00018119 |          | F36H12.3   | 2.689460562 | 0.825  | 0.306752964 | 0.593984595 |
| A_12_P136850   |          |            | 3.270997128 | 0.8225 | 0.251452376 | 0.463367002 |
| WBGene00007572 |          | C14A6.8    | 3.530648905 | 0.8225 | 0.232960009 | 0.414186921 |
| WBGene00010114 |          | F55D12.6   | 2.703782226 | 0.8225 | 0.304203494 | 0.593984595 |
| WBGene00011919 |          | T22C1.9    | 3.260506213 | 0.8225 | 0.252261442 | 0.463367002 |
| A_12_P164704   |          |            | 3.404442549 | 0.82   | 0.240861753 | 0.463367002 |
| A_12_P177535   |          |            | 3.084654655 | 0.82   | 0.265832027 | 0.489403914 |
| WBGene00002225 | klp-15   | M01E11.6   | 4.420918594 | 0.82   | 0.185481814 | 0.312483699 |
| WBGene00007633 |          | C16D2.1    | 3.993718191 | 0.82   | 0.205322449 | 0.345525782 |
| WBGene00021649 |          | Y47G6A.25  | 3.051313881 | 0.82   | 0.268736692 | 0.495348337 |

|                |          |             |             |        |             |             |
|----------------|----------|-------------|-------------|--------|-------------|-------------|
| WBGene00021877 |          | Y54G2A.12   | 3.847171368 | 0.82   | 0.213143612 | 0.345525782 |
| A_12_P136851   |          |             | 3.859859785 | 0.8175 | 0.211795258 | 0.345525782 |
| A_12_P181510   |          |             | 3.033020171 | 0.8175 | 0.269533321 | 0.495348337 |
| WBGene00001514 | xnd-1    | C05D2.5     | 4.294080841 | 0.8175 | 0.190378344 | 0.312483699 |
| WBGene00007714 |          | C25D7.1     | 3.252278189 | 0.8175 | 0.251362261 | 0.463367002 |
| WBGene00011954 |          | T23F11.2    | 2.878946818 | 0.8175 | 0.283958007 | 0.495348337 |
| WBGene00016632 |          | C44B7.12    | 2.89541635  | 0.8175 | 0.282342814 | 0.495348337 |
| WBGene00021038 |          | W05F2.6     | 2.883620773 | 0.8175 | 0.28349775  | 0.495348337 |
| A_12_P177534   |          |             | 3.777311106 | 0.815  | 0.215761947 | 0.345525782 |
| WBGene00000099 | air-2    | B0207.4     | 3.772436279 | 0.815  | 0.21604076  | 0.345525782 |
| WBGene00004044 | plk-3    | F55G1.8     | 5.257684867 | 0.815  | 0.155011192 | 0.312483699 |
| WBGene00007148 |          | B0334.10    | 2.945260241 | 0.815  | 0.276715785 | 0.495348337 |
| WBGene00007778 |          | C27D8.2     | 3.496108425 | 0.815  | 0.23311634  | 0.414186921 |
| WBGene00008312 |          | C54G4.2     | 3.009528219 | 0.815  | 0.270806565 | 0.495348337 |
| WBGene00009365 |          | F33H1.4     | 3.901260709 | 0.815  | 0.208906828 | 0.345525782 |
| WBGene00010538 | ttr-3    | K03H1.3     | 3.005458619 | 0.815  | 0.271173256 | 0.495348337 |
| WBGene00011466 |          | T05C12.1    | 2.765580608 | 0.815  | 0.294693996 | 0.495348337 |
| WBGene00012715 |          | Y39E4B.2    | 2.813515857 | 0.815  | 0.28967315  | 0.495348337 |
| WBGene00021470 | tpxl-1   | Y39G10AR.12 | 4.342794229 | 0.815  | 0.187667192 | 0.312483699 |
| WBGene00010409 |          | H21P03.2    | 2.680817531 | 0.8125 | 0.303079188 | 0.593984595 |
| WBGene00011915 |          | T22C1.4     | 3.108145199 | 0.8125 | 0.261409924 | 0.489403914 |
| WBGene00017854 |          | F27C1.4     | 3.845638708 | 0.8125 | 0.211278298 | 0.345525782 |
| WBGene00020247 |          | T05B11.4    | 4.072215479 | 0.8125 | 0.199522841 | 0.345525782 |
| WBGene00003183 | mei-1    | T01G9.5     | 3.486277765 | 0.81   | 0.232339491 | 0.414186921 |
| WBGene00010474 |          | K01D12.15   | 3.034192161 | 0.81   | 0.266957383 | 0.495348337 |
| WBGene00013894 |          | ZC434.8     | 2.849988328 | 0.81   | 0.28421169  | 0.495348337 |
| WBGene00015747 |          | C13G5.2     | 3.620494332 | 0.81   | 0.223726355 | 0.414186921 |
| WBGene00018125 | rmd-4    | F36H12.11   | 3.628239998 | 0.81   | 0.223248738 | 0.414186921 |
| WBGene00018772 |          | F53G12.4    | 2.919468747 | 0.81   | 0.277447738 | 0.495348337 |
| WBGene00003067 | lrg-1    | F55H2.4     | 3.202183018 | 0.8075 | 0.25217172  | 0.489403914 |
| WBGene00009921 |          | F52B5.2     | 4.005978995 | 0.8075 | 0.201573698 | 0.345525782 |
| WBGene00012877 |          | Y45F10C.1   | 4.464588724 | 0.8075 | 0.180867724 | 0.312483699 |
| WBGene00013085 | mpz-6    | Y51B9A.3    | 4.22233271  | 0.8075 | 0.1912495   | 0.312483699 |
| WBGene00018336 |          | F42A9.7     | 5.103186875 | 0.8075 | 0.158234456 | 0.312483699 |
| WBGene00008385 |          | D1081.7     | 3.313094794 | 0.805  | 0.242975239 | 0.463367002 |
| WBGene00009501 |          | F37A8.1     | 3.009613025 | 0.805  | 0.267476248 | 0.495348337 |
| WBGene00010781 |          | K11H3.4     | 3.418267415 | 0.805  | 0.235499422 | 0.463367002 |
| WBGene00022034 | deps-1   | Y65B4B1.2   | 3.830960197 | 0.805  | 0.210130087 | 0.345525782 |
| WBGene00022830 |          | ZK973.1     | 3.916658805 | 0.805  | 0.205532327 | 0.345525782 |
| A_12_P173496   |          |             | 4.177193898 | 0.8025 | 0.192114616 | 0.312483699 |
| WBGene00000386 | cdc-25.1 | K06A5.7     | 3.133794394 | 0.8025 | 0.25607934  | 0.489403914 |
| WBGene00002061 | ife-3    | B0348.6     | 2.977368425 | 0.8025 | 0.269533321 | 0.495348337 |
| WBGene00008210 |          | C49F5.6     | 2.994761327 | 0.8025 | 0.267967932 | 0.495348337 |
| WBGene00012547 |          | Y37D8A.5    | 2.858766816 | 0.8025 | 0.280715445 | 0.495348337 |
| WBGene00015449 | ugt-63   | C04F5.7     | 4.379343754 | 0.8025 | 0.183246634 | 0.312483699 |
| WBGene00003912 | pal-1    | C38D4.6     | 4.048444143 | 0.8    | 0.197606777 | 0.345525782 |
| WBGene00010195 | pot-2    | F57C2.3     | 2.929786299 | 0.8    | 0.273057458 | 0.495348337 |
| WBGene00002072 | ima-1    | T19B10.7    | 3.758316526 | 0.7975 | 0.212196071 | 0.345525782 |
| WBGene00009372 | evl-18   | F34D10.2    | 3.508446067 | 0.7975 | 0.22730861  | 0.414186921 |
| WBGene00011749 | ssp-36   | T13F2.12    | 3.193997046 | 0.7975 | 0.249687144 | 0.489403914 |
| WBGene00012650 | orc-1    | Y39A1A.12   | 2.97243559  | 0.7975 | 0.268298497 | 0.495348337 |
| WBGene00015997 |          | C18H7.7     | 3.46308632  | 0.7975 | 0.230285914 | 0.414186921 |
| WBGene00020588 |          | T19H12.2    | 3.098897912 | 0.7975 | 0.257349555 | 0.489403914 |
| WBGene00010184 |          | F57A10.2    | 3.573416455 | 0.795  | 0.222476168 | 0.414186921 |
| WBGene00012180 |          | W01D2.3     | 2.949486421 | 0.795  | 0.269538451 | 0.495348337 |
| WBGene00014915 |          | Y53C10A.1   | 2.75336251  | 0.795  | 0.28873786  | 0.495348337 |
| WBGene00015696 |          | C10H11.7    | 3.377218799 | 0.795  | 0.235400798 | 0.463367002 |
| WBGene00016741 |          | C48B6.3     | 4.142268842 | 0.795  | 0.191923806 | 0.312483699 |
| WBGene00016950 |          | C55C2.4     | 3.854554458 | 0.795  | 0.206249518 | 0.345525782 |
| WBGene00019024 |          | F58A6.5     | 3.287963255 | 0.795  | 0.241791023 | 0.463367002 |
| WBGene00020091 | rnp-8    | R119.7      | 4.753460875 | 0.795  | 0.167246564 | 0.312483699 |
| WBGene00021447 |          | Y39A3CR.8   | 2.869698187 | 0.795  | 0.277032617 | 0.495348337 |
| WBGene00023427 |          | F14D2.15    | 2.936116952 | 0.795  | 0.270765781 | 0.495348337 |
| WBGene00016181 |          | C28C12.11   | 2.866465526 | 0.7925 | 0.276472887 | 0.495348337 |
| WBGene00017384 |          | F11G11.4    | 2.753346438 | 0.7925 | 0.28783156  | 0.495348337 |
| WBGene00017461 | bath-28  | F14D2.13    | 3.631224115 | 0.7925 | 0.218245962 | 0.414186921 |
| WBGene00021720 |          | Y49F6B.8    | 3.403334232 | 0.7925 | 0.23285988  | 0.463367002 |
| A_12_P136852   |          |             | 2.890603492 | 0.79   | 0.273299331 | 0.495348337 |
| WBGene00004086 | pph-4.2  | Y49E10.3    | 3.714353632 | 0.79   | 0.212688419 | 0.345525782 |
| WBGene00007771 |          | C27C12.1    | 3.715349316 | 0.79   | 0.21263142  | 0.345525782 |

|                |         |            |             |        |             |             |
|----------------|---------|------------|-------------|--------|-------------|-------------|
| WBGene00009182 |         | F26H11.4   | 3.376943653 | 0.79   | 0.233939349 | 0.463367002 |
| WBGene00010035 |         | F54C8.1    | 2.735158106 | 0.79   | 0.288831566 | 0.593984595 |
| WBGene00010623 |         | K07A12.5   | 2.714135115 | 0.79   | 0.291068781 | 0.593984595 |
| WBGene00014053 |         | ZK669.3    | 5.064302315 | 0.79   | 0.155993847 | 0.312483699 |
| WBGene00017451 |         | F14D2.2    | 3.898223955 | 0.79   | 0.202656392 | 0.345525782 |
| WBGene00022094 |         | Y69A2AR.23 | 3.900580311 | 0.79   | 0.202533966 | 0.345525782 |
| WBGene00002229 | klp-19  | Y43F48.6   | 4.123423067 | 0.7875 | 0.190982101 | 0.345525782 |
| WBGene00006440 | tag-63  | Y47G6A.28  | 4.158624628 | 0.7875 | 0.189365492 | 0.312483699 |
| WBGene00008074 | nkb-2   | C43F9.6    | 2.906284486 | 0.7875 | 0.270964527 | 0.495348337 |
| WBGene00011275 |         | R53.6      | 3.635903726 | 0.7875 | 0.216589893 | 0.414186921 |
| WBGene00015851 |         | C16C8.13   | 3.494096413 | 0.7875 | 0.225380158 | 0.414186921 |
| WBGene00002120 | ins-37  | F08G2.6    | 3.485336466 | 0.785  | 0.225229331 | 0.414186921 |
| WBGene00006060 | sth-1   | ZC513.12   | 3.961729815 | 0.785  | 0.198145769 | 0.345525782 |
| WBGene00013657 |         | Y105CSB.18 | 3.605832588 | 0.785  | 0.217702841 | 0.414186921 |
| WBGene00009215 | thn-2   | F28D1.5    | 2.759789264 | 0.7825 | 0.283536142 | 0.495348337 |
| WBGene00009938 |         | F52F12.5   | 2.753461202 | 0.7825 | 0.28418777  | 0.495348337 |
| WBGene00016381 | sgo-1   | C33H5.15   | 3.02230735  | 0.7825 | 0.258914712 | 0.495348337 |
| WBGene00021188 |         | Y13C8A.1   | 2.984615419 | 0.7825 | 0.262177832 | 0.495348337 |
| WBGene00004721 | san-1   | ZC328.4    | 3.985967623 | 0.78   | 0.195686487 | 0.345525782 |
| WBGene00019712 |         | M01E11.3   | 3.253915635 | 0.78   | 0.239711193 | 0.463367002 |
| WBGene00020064 | kbp-1   | R13F6.1    | 3.830441812 | 0.78   | 0.203631862 | 0.345525782 |
| WBGene00021908 |         | Y55B1AR.4  | 3.03779985  | 0.78   | 0.256764777 | 0.495348337 |
| WBGene00004244 | puf-8   | C30G12.7   | 2.809792438 | 0.7775 | 0.276710831 | 0.495348337 |
| WBGene00008124 |         | C47A4.3    | 3.141529359 | 0.7775 | 0.247490923 | 0.489403914 |
| WBGene00012435 | flh-1   | Y11D7A.12  | 3.761159244 | 0.7775 | 0.206718182 | 0.345525782 |
| WBGene00013879 |         | ZC376.8    | 2.705127933 | 0.7775 | 0.28741709  | 0.593984595 |
| WBGene00018659 |         | F52C6.2    | 3.72606259  | 0.7775 | 0.208665309 | 0.345525782 |
| WBGene00019951 |         | R08C7.8    | 2.714409256 | 0.7775 | 0.286434331 | 0.593984595 |
| A_12_P164706   |         |            | 3.098177582 | 0.775  | 0.250147056 | 0.489403914 |
| WBGene00004132 | ifet-1  | F56F3.1    | 3.957158538 | 0.775  | 0.195847599 | 0.345525782 |
| WBGene00044633 |         | F54H12.7   | 3.697393605 | 0.775  | 0.209607113 | 0.345525782 |
| A_12_P159807   |         |            | 3.016125647 | 0.7725 | 0.256123282 | 0.495348337 |
| A_12_P173629   |         |            | 3.030075879 | 0.77   | 0.254119049 | 0.495348337 |
| WBGene00001839 | hdl-1   | ZK829.2    | 3.919412665 | 0.77   | 0.196458007 | 0.345525782 |
| WBGene00003430 | misp-32 | R05F9.3    | 4.449000596 | 0.77   | 0.173072577 | 0.312483699 |
| WBGene00008561 |         | F07H5.10   | 4.569188448 | 0.77   | 0.168520079 | 0.312483699 |
| WBGene00015084 |         | B0244.9    | 3.380828342 | 0.77   | 0.227754835 | 0.463367002 |
| WBGene00017955 |         | F31E8.5    | 2.977627837 | 0.77   | 0.258595111 | 0.495348337 |
| WBGene00000935 | daz-1   | F56D1.7    | 4.390547285 | 0.7675 | 0.174807365 | 0.312483699 |
| WBGene00006940 | wee-1.3 | Y53C12A.1  | 3.217723432 | 0.7675 | 0.238522675 | 0.489403914 |
| WBGene00007584 |         | C14C10.1   | 2.716841451 | 0.7675 | 0.282497162 | 0.593984595 |
| WBGene00010227 |         | F58A4.2    | 3.633639322 | 0.7675 | 0.211220744 | 0.414186921 |
| WBGene00011642 |         | T09B9.1    | 6.040329747 | 0.7675 | 0.1270626   | 0.300971142 |
| WBGene00013712 | dlc-6   | Y106G6G.3  | 2.690558019 | 0.7675 | 0.285256811 | 0.593984595 |
| WBGene00015516 |         | C06A8.6    | 3.433479758 | 0.7675 | 0.223534156 | 0.414186921 |
| WBGene00016387 | kbp-5   | C34B2.2    | 4.124863927 | 0.7675 | 0.186066744 | 0.345525782 |
| A_12_P161664   |         |            | 2.696927979 | 0.765  | 0.283656073 | 0.593984595 |
| A_12_P161667   |         |            | 2.817693536 | 0.765  | 0.271498653 | 0.495348337 |
| WBGene00001499 | fsn-1   | C26E6.5    | 3.936041495 | 0.765  | 0.194357707 | 0.345525782 |
| WBGene00014229 |         | ZK1128.3   | 2.829586836 | 0.765  | 0.270357492 | 0.495348337 |
| WBGene00014672 |         | C08F11.6   | 3.700557501 | 0.765  | 0.206725608 | 0.345525782 |
| WBGene00018016 | lrr-1   | F33G12.4   | 2.744229776 | 0.765  | 0.278766744 | 0.593984595 |
| A_12_P164707   |         |            | 3.303089417 | 0.7625 | 0.230844492 | 0.463367002 |
| A_12_P171289   |         |            | 2.957384698 | 0.7625 | 0.257829156 | 0.495348337 |
| WBGene00008387 |         | D1081.9    | 4.292952735 | 0.7625 | 0.177616677 | 0.312483699 |
| WBGene00018001 |         | F33D11.2   | 3.028047899 | 0.7625 | 0.251812397 | 0.495348337 |
| WBGene00018163 |         | F38A5.6    | 3.48240291  | 0.7625 | 0.218958007 | 0.414186921 |
| WBGene00020461 |         | T12C9.7    | 3.860691421 | 0.7625 | 0.197503482 | 0.345525782 |
| WBGene00022083 |         | Y69A2AR.12 | 2.88549073  | 0.7625 | 0.264253145 | 0.495348337 |
| WBGene00001862 | him-3   | ZK381.1    | 3.205478713 | 0.76   | 0.237094072 | 0.489403914 |
| WBGene00000098 | air-1   | K07C11.2   | 3.533891047 | 0.7575 | 0.214352958 | 0.414186921 |
| WBGene00008417 |         | D2030.7    | 5.14888132  | 0.7575 | 0.147119336 | 0.312483699 |
| WBGene00010728 |         | K09G1.2    | 3.23776053  | 0.7575 | 0.233958007 | 0.489403914 |
| WBGene00001511 | fzy-1   | ZK177.6    | 3.040390787 | 0.755  | 0.248323342 | 0.495348337 |
| WBGene00002125 | inx-3   | F22F4.2    | 4.771058528 | 0.755  | 0.158245806 | 0.312483699 |
| WBGene00006974 | zen-4   | M03D4.1    | 3.839930058 | 0.755  | 0.196618165 | 0.345525782 |
| WBGene00009488 | oac-20  | F36G9.12   | 2.822680539 | 0.755  | 0.267476248 | 0.495348337 |
| WBGene00011241 | mpz-5   | R11A8.8    | 2.777952013 | 0.755  | 0.271782953 | 0.495348337 |
| WBGene00017696 | polk-1  | F22B7.6    | 3.160110038 | 0.755  | 0.238915731 | 0.489403914 |
| WBGene00018897 |         | F55F8.9    | 3.377459695 | 0.755  | 0.223540788 | 0.463367002 |

|                |          |           |             |        |             |             |
|----------------|----------|-----------|-------------|--------|-------------|-------------|
| WBGene00019833 |          | R02F2.4   | 2.700388289 | 0.755  | 0.279589422 | 0.593984595 |
| WBGene00020103 |          | R148.4    | 4.059013961 | 0.755  | 0.186005766 | 0.345525782 |
| A_12_P172783   |          |           | 4.017311512 | 0.7525 | 0.187314326 | 0.345525782 |
| WBGene00004823 | skr-17   | C06A8.4   | 3.266234593 | 0.7525 | 0.230387616 | 0.463367002 |
| WBGene00007777 |          | C27D8.1   | 2.775864331 | 0.7525 | 0.271086736 | 0.495348337 |
| WBGene00011513 | fbxa-197 | T06C12.4  | 2.752427867 | 0.7525 | 0.273394994 | 0.593984595 |
| WBGene00018380 | decr-1.1 | F43C11.3  | 3.538632037 | 0.7525 | 0.212652797 | 0.414186921 |
| WBGene00022650 |          | ZK84.2    | 2.839514879 | 0.7525 | 0.265010057 | 0.495348337 |
| WBGene00001214 | ego-1    | F26A3.3   | 3.291521278 | 0.75   | 0.227858131 | 0.463367002 |
| WBGene00004339 | rhc-3    | C39E9.13  | 2.865954624 | 0.75   | 0.261692908 | 0.495348337 |
| WBGene00007244 |          | C01G12.3  | 3.003417085 | 0.75   | 0.249715567 | 0.495348337 |
| WBGene00021880 |          | Y54G2A.15 | 3.597684884 | 0.75   | 0.208467396 | 0.414186921 |
| WBGene00003037 | lin-54   | JC8.6     | 2.718581148 | 0.7475 | 0.274959606 | 0.593984595 |
| WBGene00014752 |          | F38E11.8  | 3.33846813  | 0.7475 | 0.223905088 | 0.463367002 |
| WBGene00017559 | mpz-3    | F18C5.4   | 3.131332157 | 0.7475 | 0.238716292 | 0.489403914 |
| WBGene00018327 |          | F42A6.5   | 3.978927547 | 0.7475 | 0.187864692 | 0.345525782 |
| WBGene00019595 |          | K09H9.2   | 3.684757569 | 0.7475 | 0.202862735 | 0.345525782 |
| A_12_P149955   |          |           | 2.690752104 | 0.745  | 0.276874261 | 0.593984595 |
| A_12_P164705   |          |           | 2.72054179  | 0.745  | 0.273842513 | 0.593984595 |
| A_12_P177573   |          |           | 3.135441509 | 0.745  | 0.237606091 | 0.489403914 |
| WBGene00002992 | lin-3    | F36H1.4   | 3.235019532 | 0.745  | 0.230292273 | 0.489403914 |
| WBGene00007376 |          | C06C3.5   | 2.742386895 | 0.745  | 0.271661158 | 0.593984595 |
| WBGene00011410 |          | T04A8.8   | 3.441334545 | 0.745  | 0.216485782 | 0.414186921 |
| WBGene00012273 |          | W05B2.7   | 4.524749589 | 0.745  | 0.164649996 | 0.312483699 |
| WBGene00012638 |          | Y38H8A.4  | 3.194459188 | 0.745  | 0.233216315 | 0.489403914 |
| WBGene00012689 |          | Y39B6A.30 | 2.805390708 | 0.745  | 0.265560158 | 0.495348337 |
| WBGene00014851 |          | W01G7.2   | 3.680065035 | 0.745  | 0.202442074 | 0.345525782 |
| WBGene00018498 |          | F46F5.7   | 3.139950123 | 0.745  | 0.237264915 | 0.489403914 |
| WBGene00018613 | skpt-1   | F48E8.7   | 3.611086155 | 0.745  | 0.206309118 | 0.414186921 |
| WBGene00019431 |          | K06A5.3   | 4.524749589 | 0.745  | 0.164649996 | 0.312483699 |
| A_12_P159809   |          |           | 2.800007425 | 0.7425 | 0.265177868 | 0.495348337 |
| WBGene00002212 | kin-31   | B0523.1   | 5.98294548  | 0.7425 | 0.124102752 | 0.300971142 |
| WBGene00007733 |          | C25G4.6   | 2.931420736 | 0.7425 | 0.253290151 | 0.495348337 |
| WBGene00022036 |          | Y65B4BL.4 | 4.470956544 | 0.7425 | 0.166071845 | 0.312483699 |
| A_12_P171291   |          |           | 3.024233939 | 0.74   | 0.244690065 | 0.495348337 |
| WBGene00007610 |          | C15H7.3   | 2.736496259 | 0.74   | 0.270418787 | 0.593984595 |
| WBGene00008493 |          | F01D5.2   | 2.748155161 | 0.74   | 0.26927155  | 0.593984595 |
| WBGene00010242 |          | F58D5.2   | 3.815741068 | 0.74   | 0.193933495 | 0.345525782 |
| WBGene00008219 |          | C50B6.3   | 3.5195874   | 0.7375 | 0.209541607 | 0.414186921 |
| WBGene00009006 |          | F21D5.1   | 3.930009109 | 0.7375 | 0.187658598 | 0.345525782 |
| WBGene00009163 | drsh-1   | F26E4.10  | 3.833566366 | 0.7375 | 0.192379609 | 0.345525782 |
| WBGene00009535 |          | F38C2.1   | 3.73577833  | 0.735  | 0.196746149 | 0.345525782 |
| WBGene00009753 | scrm-6   | F46A8.10  | 2.848741188 | 0.735  | 0.258008696 | 0.495348337 |
| WBGene00010621 | egg-6    | K07A12.2  | 2.794778323 | 0.735  | 0.262990447 | 0.495348337 |
| WBGene00007500 | nasp-1   | C09H10.6  | 2.769756423 | 0.7325 | 0.264463689 | 0.495348337 |
| WBGene00011038 |          | R05H5.3   | 3.917760274 | 0.7325 | 0.186969071 | 0.345525782 |
| WBGene00012191 |          | W02A2.8   | 2.914120824 | 0.7325 | 0.251362261 | 0.495348337 |
| WBGene00015894 | acdH-2   | C17C3.12  | 3.930878647 | 0.7325 | 0.186345106 | 0.345525782 |
| A_12_P108807   |          |           | 3.063852034 | 0.73   | 0.238262159 | 0.495348337 |
| WBGene00012905 |          | Y46G5A.14 | 2.868666945 | 0.7275 | 0.253602113 | 0.495348337 |
| WBGene00015816 |          | C16A11.3  | 3.020180156 | 0.7275 | 0.24087967  | 0.495348337 |
| WBGene00018494 |          | F46F5.2   | 2.95327807  | 0.7275 | 0.246336438 | 0.495348337 |
| WBGene00019151 | pck-3    | H04M03.1  | 3.051263942 | 0.7275 | 0.238425785 | 0.495348337 |
| WBGene00001829 | hcp-1    | ZK1055.1  | 3.120771216 | 0.725  | 0.23231437  | 0.489403914 |
| WBGene00013857 | orc-5    | ZC168.3   | 3.65892244  | 0.725  | 0.198145769 | 0.345525782 |
| WBGene00022357 | kbp-4    | Y92C3B.1  | 2.890967545 | 0.725  | 0.250781093 | 0.495348337 |
| WBGene00000405 | cdk-1    | T05G5.3   | 4.054096262 | 0.7225 | 0.178214811 | 0.345525782 |
| WBGene00009185 |          | F27C8.5   | 2.90958015  | 0.7225 | 0.248317614 | 0.495348337 |
| WBGene00016449 |          | C35D10.13 | 3.621139303 | 0.7225 | 0.199522841 | 0.414186921 |
| WBGene00018548 | clec-79  | F47C12.4  | 2.714736139 | 0.7225 | 0.266140046 | 0.593984595 |
| WBGene00020375 |          | T09B4.1   | 3.28744578  | 0.7225 | 0.219775488 | 0.463367002 |
| WBGene00020858 | mop-25.3 | T27C10.3  | 3.213935022 | 0.7225 | 0.224802305 | 0.489403914 |
| WBGene00002086 | ins-3    | ZK75.3    | 6.023578064 | 0.72   | 0.119530285 | 0.300971142 |
| WBGene00012512 | ekl-5    | Y26E6A.1  | 5.784015661 | 0.72   | 0.124480991 | 0.312483699 |
| WBGene00014755 |          | F40F12.8  | 2.827397181 | 0.72   | 0.25465117  | 0.495348337 |
| A_12_P164708   |          |           | 2.842755661 | 0.7175 | 0.252395944 | 0.495348337 |
| A_12_P172782   |          |           | 4.704375744 | 0.7175 | 0.152517579 | 0.312483699 |
| WBGene00006719 | ubc-24   | F49E12.4  | 4.288218881 | 0.7175 | 0.167318885 | 0.312483699 |
| WBGene00017672 |          | F21F3.2   | 2.683781449 | 0.7175 | 0.267346658 | 0.593984595 |
| WBGene00019789 |          | M116.2    | 3.281803533 | 0.7175 | 0.218629785 | 0.463367002 |

|                |          |           |             |        |             |             |
|----------------|----------|-----------|-------------|--------|-------------|-------------|
| WBGene00020105 |          | R148.7    | 2.792304061 | 0.7175 | 0.256956257 | 0.495348337 |
| WBGene00016971 | toe-2    | C56E6.3   | 3.653201803 | 0.715  | 0.195718725 | 0.345525782 |
| WBGene00000264 | brc-1    | C36A4.8   | 2.729177575 | 0.7125 | 0.261067659 | 0.593984595 |
| WBGene00000804 | csc-1    | Y48E1B.12 | 3.882163103 | 0.7125 | 0.183531702 | 0.345525782 |
| WBGene00000871 | cye-1    | C37A2.4   | 3.353230074 | 0.7125 | 0.212481692 | 0.463367002 |
| WBGene00009470 |          | F36D3.4   | 3.454678341 | 0.7125 | 0.206242066 | 0.414186921 |
| WBGene00010634 |          | K07F5.6   | 2.673392582 | 0.7125 | 0.26651529  | 0.593984595 |
| WBGene00015327 | snpn-1   | C02B10.2  | 3.633407243 | 0.7125 | 0.196096928 | 0.414186921 |
| WBGene00018902 |          | F55G1.6   | 3.636986549 | 0.7125 | 0.195903941 | 0.345525782 |
| WBGene00045247 |          | F54H12.8  | 2.675065666 | 0.7125 | 0.266348602 | 0.593984595 |
| A_12_P166050   |          |           | 5.185033072 | 0.71   | 0.136932588 | 0.312483699 |
| WBGene00003222 | mes-4    | Y2H9A.1   | 6.749829622 | 0.71   | 0.10518784  | 0.300971142 |
| WBGene00015931 |          | C17H12.5  | 2.765648497 | 0.71   | 0.256720983 | 0.495348337 |
| WBGene00002297 | ect-2    | T19E10.1  | 3.604367716 | 0.7075 | 0.196289629 | 0.414186921 |
| WBGene00014681 |          | C25D7.14  | 5.604764541 | 0.7075 | 0.126231886 | 0.312483699 |
| A_12_P172785   |          |           | 4.104206355 | 0.705  | 0.171774989 | 0.345525782 |
| WBGene00001998 | hpr-17   | F32A11.2  | 2.854904482 | 0.705  | 0.246943463 | 0.495348337 |
| WBGene00005013 | jmjd-1.1 | F43G6.6   | 4.729272145 | 0.705  | 0.149071565 | 0.312483699 |
| WBGene00012565 | fbxa-210 | Y37H2A.5  | 4.654755565 | 0.705  | 0.151458007 | 0.312483699 |
| WBGene00018668 | bath-2   | F52C6.11  | 3.016490659 | 0.705  | 0.233715294 | 0.495348337 |
| WBGene00014084 | snb-7    | ZK795.4   | 3.576557276 | 0.7025 | 0.196417937 | 0.414186921 |
| WBGene00017446 |          | F14B8.4   | 3.851695233 | 0.7025 | 0.182387224 | 0.345525782 |
| A_12_P161219   |          |           | 2.930792668 | 0.7    | 0.238843234 | 0.495348337 |
| WBGene00001831 | hcp-3    | F58A4.3   | 3.639108755 | 0.7    | 0.19235479  | 0.345525782 |
| WBGene00015241 |          | B0524.2   | 3.58306151  | 0.7    | 0.195363657 | 0.414186921 |
| WBGene00022674 |          | ZK177.9   | 2.878995064 | 0.7    | 0.243140396 | 0.495348337 |
| WBGene00045484 |          | F34D10.9  | 3.672191309 | 0.7    | 0.190621877 | 0.345525782 |
| WBGene00008174 |          | C48B4.11  | 3.141303455 | 0.6975 | 0.222041586 | 0.489403914 |
| WBGene00018830 | ska-3    | F54E7.8   | 3.25912507  | 0.6975 | 0.214014493 | 0.463367002 |
| WBGene00001864 | him-5    | D1086.4   | 2.859818182 | 0.695  | 0.243022443 | 0.495348337 |
| WBGene00009129 |          | F25H5.7   | 2.717211103 | 0.695  | 0.255776962 | 0.593984595 |
| WBGene00016807 |          | C50D2.3   | 3.348047689 | 0.6925 | 0.206836958 | 0.463367002 |
| WBGene00022890 | fbxa-224 | ZK1290.9  | 2.793411705 | 0.6925 | 0.247904739 | 0.495348337 |
| WBGene00003590 | nex-3    | C28A5.3   | 3.350795289 | 0.69   | 0.205921264 | 0.463367002 |
| WBGene00015796 |          | C15F1.5   | 2.817204006 | 0.69   | 0.24492369  | 0.495348337 |
| WBGene00017647 |          | F20H11.4  | 2.714314394 | 0.69   | 0.25420784  | 0.593984595 |
| WBGene00021743 |          | Y50D4B.4  | 2.906648046 | 0.69   | 0.237386842 | 0.495348337 |
| A_12_P173474   |          |           | 4.084833258 | 0.6875 | 0.168305524 | 0.345525782 |
| WBGene00006411 | octr-1   | F14D12.6  | 3.200606416 | 0.6875 | 0.214803044 | 0.489403914 |
| WBGene00009272 | gras-1   | F30F8.3   | 5.07214226  | 0.6875 | 0.135544305 | 0.312483699 |
| WBGene00011560 |          | T07C4.3   | 3.841683378 | 0.6875 | 0.178958007 | 0.345525782 |
| WBGene00011910 |          | T22B3.2   | 2.731182617 | 0.6875 | 0.251722457 | 0.593984595 |
| WBGene00013886 |          | ZC412.5   | 3.555389457 | 0.6875 | 0.193368408 | 0.414186921 |
| WBGene00019980 | chil-14  | R09B5.12  | 3.830609909 | 0.6875 | 0.179475336 | 0.345525782 |
| WBGene00022229 |          | Y73B6A.2  | 2.964567933 | 0.6875 | 0.231905632 | 0.495348337 |
| WBGene00012795 |          | Y43E12A.3 | 2.745371897 | 0.685  | 0.249510822 | 0.593984595 |
| WBGene00019608 | ani-2    | K10B2.5   | 3.397091785 | 0.685  | 0.201643065 | 0.463367002 |
| WBGene00019692 |          | M01A10.1  | 2.699127592 | 0.685  | 0.253785705 | 0.593984595 |
| WBGene00001856 | hil-5    | B0414.3   | 4.016382906 | 0.6825 | 0.169929017 | 0.345525782 |
| WBGene00003839 | ocr-2    | T09A12.3  | 4.678826572 | 0.6825 | 0.145869908 | 0.312483699 |
| WBGene00008921 |          | F17C11.10 | 3.300647931 | 0.6825 | 0.206777583 | 0.463367002 |
| WBGene00013214 |          | Y54G11A.3 | 3.257109696 | 0.6825 | 0.209541607 | 0.463367002 |
| A_12_P159901   |          |           | 3.92367733  | 0.68   | 0.17330681  | 0.345525782 |
| WBGene00013481 |          | Y69H2.3   | 2.682956232 | 0.68   | 0.253451768 | 0.593984595 |
| WBGene00015011 |          | B0041.8   | 3.010393907 | 0.68   | 0.225884061 | 0.495348337 |
| WBGene00002064 | iff-1    | T05G5.10  | 3.498927013 | 0.6775 | 0.19363079  | 0.414186921 |
| WBGene00010263 | wago-4   | F58G1.1   | 3.552437419 | 0.6775 | 0.190714127 | 0.414186921 |
| A_12_P180119   |          |           | 4.138303841 | 0.675  | 0.163110305 | 0.345525782 |
| WBGene00015634 |          | C09D4.3   | 4.018144882 | 0.675  | 0.16798797  | 0.345525782 |
| WBGene00018416 | retr-1   | F44E2.2   | 2.8567033   | 0.675  | 0.236286352 | 0.495348337 |
| WBGene00021175 | math-46  | Y8G1A.1   | 2.729340848 | 0.675  | 0.24731246  | 0.593984595 |
| WBGene00021563 |          | Y45G12B.2 | 3.689133221 | 0.675  | 0.182969809 | 0.345525782 |
| WBGene00044188 |          | F28F8.9   | 3.242942829 | 0.675  | 0.20814428  | 0.463367002 |
| WBGene00001609 | glp-1    | F02A9.6   | 2.856306104 | 0.6725 | 0.235443953 | 0.495348337 |
| WBGene00003835 | nxf-2    | C15H11.6  | 3.246699001 | 0.6725 | 0.207133461 | 0.463367002 |
| WBGene00009444 |          | F35G12.11 | 3.299208946 | 0.6725 | 0.203836741 | 0.463367002 |
| WBGene00010371 |          | H06O01.4  | 3.569294675 | 0.6725 | 0.188412575 | 0.414186921 |
| WBGene00022218 |          | Y73B3A.16 | 3.073667691 | 0.6725 | 0.218793984 | 0.495348337 |
| WBGene00008172 |          | C48B4.9   | 2.728794257 | 0.67   | 0.245529687 | 0.593984595 |
| WBGene00012276 | his-74   | W05B10.1  | 4.427971494 | 0.67   | 0.151310821 | 0.312483699 |



|                |          |             |             |        |             |             |
|----------------|----------|-------------|-------------|--------|-------------|-------------|
| WBGene00013719 |          | Y106G6H.6   | 2.87071753  | 0.67   | 0.233391127 | 0.495348337 |
| WBGene00021953 |          | Y55H10A.2   | 4.279767732 | 0.67   | 0.156550552 | 0.312483699 |
| WBGene00044696 |          | F52E1.14    | 4.776089711 | 0.67   | 0.140282122 | 0.312483699 |
| A_12_P108193   |          |             | 3.178468825 | 0.6675 | 0.210006779 | 0.489403914 |
| WBGene00000864 | cya-2    | F59H6.7     | 4.240421896 | 0.6675 | 0.157413582 | 0.312483699 |
| WBGene00007092 |          | B0001.7     | 2.758548297 | 0.6675 | 0.2419751   | 0.495348337 |
| WBGene00008266 |          | C53A5.6     | 3.085819019 | 0.6675 | 0.216312102 | 0.489403914 |
| WBGene00015524 |          | C06E1.9     | 5.170763067 | 0.6675 | 0.129091198 | 0.312483699 |
| WBGene00015839 | math-10  | C16C4.15    | 4.753015156 | 0.6675 | 0.140437171 | 0.312483699 |
| WBGene00045434 |          | Y95D11A.3   | 4.357255648 | 0.6675 | 0.153192756 | 0.312483699 |
| WBGene00000517 | cki-2    | T05A6.2     | 4.986747714 | 0.665  | 0.133353448 | 0.312483699 |
| WBGene00018409 |          | F44B9.8     | 2.75359117  | 0.665  | 0.241505619 | 0.495348337 |
| WBGene00019459 |          | K06H7.8     | 2.891470275 | 0.665  | 0.229986801 | 0.495348337 |
| WBGene00020187 | gsp-4    | T03F1.5     | 3.827670623 | 0.665  | 0.173734907 | 0.345525782 |
| WBGene00020922 |          | W01H2.2     | 3.162960803 | 0.665  | 0.210246045 | 0.489403914 |
| WBGene00012741 |          | Y40H4A.2    | 2.885801991 | 0.6625 | 0.229572231 | 0.495348337 |
| WBGene00017700 |          | F22D3.4     | 2.978651712 | 0.6625 | 0.222416067 | 0.495348337 |
| WBGene00020120 |          | R160.3      | 2.9046334   | 0.6625 | 0.228083861 | 0.495348337 |
| WBGene00017691 | ily5-5   | F22A3.6     | 2.859931302 | 0.66   | 0.230774774 | 0.495348337 |
| WBGene00020819 |          | T26A5.2     | 4.529063625 | 0.66   | 0.145725486 | 0.312483699 |
| WBGene00050912 |          | F43E2.12    | 3.204178969 | 0.66   | 0.205981004 | 0.489403914 |
| WBGene00011166 | chil-22  | R09D1.10    | 2.742677649 | 0.6575 | 0.23972923  | 0.593984595 |
| WBGene00018909 | slx-1    | F56A3.2     | 3.008874878 | 0.6575 | 0.21852022  | 0.495348337 |
| WBGene00021006 | dct-9    | W03F11.3    | 3.270859938 | 0.6575 | 0.201017473 | 0.463367002 |
| WBGene00004899 | snb-5    | C30A5.5     | 2.896703472 | 0.655  | 0.226119106 | 0.495348337 |
| WBGene00013726 |          | Y106G6H.16  | 4.076800062 | 0.655  | 0.160665225 | 0.345525782 |
| WBGene00015146 | abi-1    | B0336.6     | 4.175333049 | 0.655  | 0.156873713 | 0.312483699 |
| WBGene00016072 |          | C24H12.2    | 3.330245907 | 0.655  | 0.196682172 | 0.463367002 |
| WBGene00017132 | mel-47   | EEED8.1     | 2.76632374  | 0.655  | 0.236776336 | 0.495348337 |
| WBGene00018666 | bath-6   | F52C6.9     | 3.59249956  | 0.655  | 0.182324309 | 0.414186921 |
| WBGene00022735 |          | ZK418.6     | 3.136247465 | 0.655  | 0.208848315 | 0.489403914 |
| A_12_P149956   |          |             | 3.151044253 | 0.6525 | 0.20707421  | 0.489403914 |
| WBGene00000885 | cyn-9    | T27D1.1     | 2.760405307 | 0.6525 | 0.236378331 | 0.495348337 |
| WBGene00001872 | him-14   | ZK1127.11   | 2.964544559 | 0.6525 | 0.220101262 | 0.495348337 |
| WBGene00011352 | rskn-1   | T01H8.1     | 2.703466548 | 0.6525 | 0.241356787 | 0.593984595 |
| WBGene00019247 | syp-4    | H27M09.3    | 3.573332152 | 0.6525 | 0.182602672 | 0.414186921 |
| WBGene00020597 |          | T20B6.1     | 4.184418175 | 0.6525 | 0.155935658 | 0.312483699 |
| WBGene00007644 |          | C17E4.4     | 4.029100355 | 0.65   | 0.161326337 | 0.345525782 |
| WBGene00012182 | osta-3   | W01D2.5     | 2.944047243 | 0.65   | 0.220784501 | 0.495348337 |
| WBGene00013704 |          | Y106G6D.8   | 3.988197675 | 0.65   | 0.162980888 | 0.345525782 |
| A_12_P177572   |          |             | 2.775871999 | 0.6475 | 0.233260035 | 0.495348337 |
| WBGene00012651 | orc-4    | Y39A1A.13   | 3.654765368 | 0.6475 | 0.177165956 | 0.345525782 |
| WBGene00015267 | chin-1   | BE0003N10.2 | 3.078134641 | 0.6475 | 0.210354671 | 0.489403914 |
| WBGene00021192 |          | Y14H12B.2   | 4.667414929 | 0.6475 | 0.138727756 | 0.312483699 |
| WBGene00021878 |          | Y54G2A.13   | 3.481237971 | 0.6475 | 0.185997052 | 0.414186921 |
| A_12_P159904   |          |             | 3.450885475 | 0.645  | 0.18690855  | 0.414186921 |
| WBGene00012924 |          | Y47D3A.5    | 2.853137674 | 0.645  | 0.226066904 | 0.495348337 |
| WBGene00014777 |          | F58A4.12    | 3.20657803  | 0.645  | 0.201149011 | 0.489403914 |
| WBGene00021559 |          | Y45G5AM.7   | 5.457849752 | 0.645  | 0.118178409 | 0.312483699 |
| A_12_P159900   |          |             | 2.964916627 | 0.6425 | 0.216700866 | 0.495348337 |
| WBGene00001110 | duo-1    | F38B7.5     | 3.481931524 | 0.6425 | 0.184524019 | 0.414186921 |
| WBGene00004333 | rec-8    | W02A2.6     | 4.401445341 | 0.6425 | 0.145974777 | 0.312483699 |
| WBGene00012566 | fbxa-211 | Y37H2A.6    | 3.245804109 | 0.6425 | 0.197947867 | 0.463367002 |
| WBGene00015843 |          | C16C8.5     | 2.893602107 | 0.6425 | 0.222041586 | 0.495348337 |
| WBGene00021460 | zwl-1    | Y39G10AR.2  | 4.250713919 | 0.6425 | 0.15115108  | 0.312483699 |
| WBGene00021227 | mct-1    | Y19D10A.12  | 2.856582225 | 0.64   | 0.224043962 | 0.495348337 |
| WBGene00000144 | apc-10   | F15H10.3    | 3.45483478  | 0.6375 | 0.184524019 | 0.414186921 |
| WBGene00003157 | mcm-5    | R10E4.4     | 2.985081686 | 0.6375 | 0.213561995 | 0.495348337 |
| WBGene00003764 | nlp-26   | Y43F8C.2    | 3.553480474 | 0.6375 | 0.179401577 | 0.414186921 |
| WBGene00007785 |          | C27H6.3     | 3.595268121 | 0.6375 | 0.1773164   | 0.414186921 |
| WBGene00008546 |          | F07A11.2    | 4.379803751 | 0.6375 | 0.145554467 | 0.312483699 |
| WBGene00017992 |          | F32E10.5    | 3.983557296 | 0.6375 | 0.160032843 | 0.345525782 |
| A_12_P136540   |          |             | 3.987713793 | 0.635  | 0.159239111 | 0.345525782 |
| WBGene00008580 |          | F08G5.1     | 3.329444444 | 0.635  | 0.19072251  | 0.463367002 |
| WBGene00010093 | capg-2   | F55C5.4     | 4.181778605 | 0.635  | 0.151849263 | 0.312483699 |
| WBGene00011985 |          | T24D1.2     | 3.754494477 | 0.635  | 0.169130626 | 0.345525782 |
| WBGene00044290 |          | B0035.18    | 2.689652692 | 0.635  | 0.236089961 | 0.593984595 |
| A_12_P162828   |          |             | 5.620567197 | 0.6325 | 0.112533127 | 0.312483699 |
| A_12_P177571   |          |             | 2.870144049 | 0.6325 | 0.220372214 | 0.495348337 |
| WBGene00007998 |          | C38C6.5     | 3.867798567 | 0.6325 | 0.163529716 | 0.345525782 |

|                |         |           |             |        |             |             |
|----------------|---------|-----------|-------------|--------|-------------|-------------|
| WBGene00013669 |         | Y105E8A.8 | 3.765380553 | 0.6325 | 0.167977709 | 0.345525782 |
| WBGene00017279 |         | F09C12.8  | 2.90911334  | 0.6325 | 0.217420199 | 0.495348337 |
| WBGene00015262 |         | B0563.5   | 3.568722931 | 0.63   | 0.176533738 | 0.414186921 |
| WBGene00015351 |         | C02F5.10  | 2.828033209 | 0.63   | 0.222769661 | 0.495348337 |
| WBGene00017827 |         | F26F4.5   | 2.883299579 | 0.63   | 0.218499668 | 0.495348337 |
| WBGene00018302 |         | F41G3.6   | 6.979621968 | 0.63   | 0.090262768 | 0.300971142 |
| WBGene00018585 |         | F48A11.4  | 3.340547977 | 0.63   | 0.188591813 | 0.463367002 |
| WBGene00044039 |         | C47G2.7   | 3.045331128 | 0.63   | 0.206874055 | 0.495348337 |
| A_12_P113956   |         |           | 3.367407988 | 0.6275 | 0.186345106 | 0.463367002 |
| WBGene00001598 | glh-1   | T21G5.3   | 3.552467571 | 0.6275 | 0.176637784 | 0.414186921 |
| WBGene00010666 |         | K08E4.2   | 3.369923523 | 0.6275 | 0.186206006 | 0.463367002 |
| WBGene00011155 |         | R09B3.2   | 4.933178146 | 0.6275 | 0.127199947 | 0.312483699 |
| WBGene00017397 |         | F12A10.8  | 4.119516625 | 0.6275 | 0.152323696 | 0.345525782 |
| WBGene00008035 |         | C39E9.12  | 3.3352567   | 0.625  | 0.187391873 | 0.463367002 |
| WBGene00009937 | isl-1   | F52F12.4  | 3.979425172 | 0.625  | 0.15705786  | 0.345525782 |
| WBGene00013979 |         | ZK507.3   | 2.69616005  | 0.625  | 0.231811164 | 0.593984595 |
| WBGene00017774 | nop-1   | F25B5.2   | 2.938964682 | 0.625  | 0.212659922 | 0.495348337 |
| WBGene00000886 | cyn-10  | B0252.4   | 4.572337482 | 0.6225 | 0.136144806 | 0.312483699 |
| WBGene00001102 | dsh-2   | C27A2.6   | 3.425251834 | 0.6225 | 0.181738462 | 0.463367002 |
| WBGene00009286 |         | F31C3.4   | 3.281427313 | 0.6225 | 0.189704034 | 0.463367002 |
| WBGene00011819 | hal-2   | T16H12.11 | 3.637583041 | 0.6225 | 0.171130114 | 0.345525782 |
| WBGene00014250 |         | ZK1307.9  | 3.322068378 | 0.6225 | 0.187383259 | 0.463367002 |
| WBGene00019141 | bath-5  | F59H6.11  | 2.778882536 | 0.6225 | 0.224010908 | 0.495348337 |
| WBGene00022751 |         | ZK484.5   | 3.513654736 | 0.6225 | 0.177165956 | 0.414186921 |
| A_12_P173493   |         |           | 2.946896056 | 0.62   | 0.210390862 | 0.495348337 |
| WBGene00000275 | bub-1   | R06C7.8   | 5.61453365  | 0.62   | 0.110427693 | 0.312483699 |
| WBGene00001867 | him-8   | T07G12.12 | 3.190529269 | 0.62   | 0.194325125 | 0.489403914 |
| WBGene00001985 | hop-1   | C18E3.8   | 3.657920332 | 0.62   | 0.169495217 | 0.345525782 |
| WBGene00006804 | unc-71  | Y37D8A.13 | 3.041989384 | 0.62   | 0.203813992 | 0.495348337 |
| WBGene00015012 | bath-20 | B0047.1   | 3.056598988 | 0.62   | 0.202839824 | 0.495348337 |
| WBGene00000498 | chk-1   | Y39H10A.7 | 2.861302889 | 0.6175 | 0.215810777 | 0.495348337 |
| WBGene00012167 |         | W01A8.5   | 3.875904085 | 0.6175 | 0.159317668 | 0.345525782 |
| WBGene00018068 |         | F35H10.2  | 2.873224246 | 0.6175 | 0.214915352 | 0.495348337 |
| WBGene00003159 | mcm-7   | F32D1.10  | 3.37978682  | 0.615  | 0.181964139 | 0.463367002 |
| WBGene00005007 | spr-2   | C27B7.1   | 4.081766998 | 0.615  | 0.150670041 | 0.345525782 |
| WBGene00007762 |         | C27B7.5   | 3.487495537 | 0.615  | 0.176344312 | 0.414186921 |
| WBGene00007978 |         | C36B1.11  | 3.472612924 | 0.615  | 0.177100072 | 0.414186921 |
| WBGene00010583 |         | K05C4.7   | 3.549418741 | 0.615  | 0.173267807 | 0.414186921 |
| WBGene00010608 |         | K07A1.1   | 3.353359662 | 0.615  | 0.183398162 | 0.463367002 |
| WBGene00015310 | fan-1   | C01G5.8   | 3.113275125 | 0.6125 | 0.196738154 | 0.489403914 |
| WBGene00003158 | mcm-6   | ZK632.1   | 3.246276624 | 0.61   | 0.187907585 | 0.463367002 |
| WBGene00010617 |         | K07A1.13  | 2.94527707  | 0.61   | 0.207111245 | 0.495348337 |
| WBGene00015745 |         | C13F10.6  | 3.046209169 | 0.61   | 0.200248888 | 0.495348337 |
| WBGene00044763 |         | ZK688.12  | 3.443648158 | 0.61   | 0.177137725 | 0.414186921 |
| WBGene00009346 |         | F32H2.10  | 2.933730856 | 0.6075 | 0.20707421  | 0.495348337 |
| A_12_P173476   |         |           | 2.703236263 | 0.605  | 0.223805817 | 0.593984595 |
| WBGene00002034 | htp-3   | F57C9.5   | 3.612063132 | 0.605  | 0.167494304 | 0.414186921 |
| WBGene00004737 | scc-1   | F10G7.4   | 6.160126328 | 0.605  | 0.098212272 | 0.300971142 |
| WBGene00010056 | smc-6   | F54D5.14  | 2.851040644 | 0.605  | 0.212203218 | 0.495348337 |
| WBGene00012313 |         | W06G6.11  | 5.57147926  | 0.605  | 0.108588756 | 0.312483699 |
| WBGene00018120 |         | F36H12.4  | 2.689915844 | 0.605  | 0.2249141   | 0.593984595 |
| WBGene00022298 |         | Y76B12C.4 | 2.893598486 | 0.605  | 0.209082222 | 0.495348337 |
| WBGene00011601 | zim-3   | T07G12.11 | 3.18167789  | 0.6025 | 0.189365492 | 0.489403914 |
| WBGene00001016 | dna-2   | F43G6.1   | 3.725263171 | 0.6    | 0.161062446 | 0.345525782 |
| WBGene00001830 | hcp-2   | T06E4.1   | 2.759195421 | 0.6    | 0.217454695 | 0.495348337 |
| WBGene00008648 |         | F10D11.2  | 2.880581985 | 0.6    | 0.208291242 | 0.495348337 |
| WBGene00011886 |         | T21B10.4  | 2.834748119 | 0.6    | 0.211659017 | 0.495348337 |
| WBGene00021345 |         | Y37B11A.3 | 3.1609915   | 0.6    | 0.189813861 | 0.489403914 |
| WBGene00022610 |         | ZC416.6   | 2.752917646 | 0.6    | 0.217950581 | 0.495348337 |

#### B. CEH-23 repressed genes

| Gene ID        | public name | seq name | Score(d)     | Numerator(r) | Denominator(s+s0) | q-value(%)  |
|----------------|-------------|----------|--------------|--------------|-------------------|-------------|
| A_12_P161556   |             |          | -3.07119558  | -0.6         | 0.195363657       | 0.50676114  |
| WBGene00001594 | glc-4       | C27H5.8  | -3.331306401 | -0.6         | 0.180109521       | 0.489403914 |
| WBGene00003778 | nnt-1       | C15H9.1  | -3.423892775 | -0.6         | 0.175239133       | 0.463367002 |
| WBGene00006761 | unc-24      | F57H12.2 | -3.463627509 | -0.6         | 0.173228789       | 0.463367002 |
| WBGene00010290 |             | F58H1.7  | -3.202435319 | -0.6         | 0.187357414       | 0.489403914 |

|                |         |            |              |         |             |             |
|----------------|---------|------------|--------------|---------|-------------|-------------|
| WBGene00011924 |         | T22C8.3    | -3.521518276 | -0.6    | 0.170381055 | 0.463367002 |
| WBGene00012124 |         | T28D6.4    | -3.792657926 | -0.6    | 0.1582004   | 0.439880899 |
| WBGene00012777 | lact-8  | Y42A5A.2   | -3.356043623 | -0.6    | 0.178781943 | 0.463367002 |
| WBGene00016625 | aff-1   | C44B7.3    | -3.016069319 | -0.6    | 0.19893442  | 0.50676114  |
| WBGene00003569 | ncx-4   | F35C12.2   | -2.847042117 | -0.6025 | 0.211623143 | 0.50676114  |
| WBGene00006759 | unc-22  | ZK617.1    | -4.001763009 | -0.6025 | 0.150558641 | 0.439880899 |
| WBGene00010345 |         | F59F5.7    | -3.94037986  | -0.6025 | 0.15290404  | 0.439880899 |
| WBGene00011956 |         | T23F11.4   | -2.942704333 | -0.6025 | 0.204743641 | 0.50676114  |
| WBGene00012891 | sorb-1  | Y45F10D.13 | -3.286639134 | -0.6025 | 0.183317966 | 0.489403914 |
| WBGene00016863 |         | C52A10.2   | -3.781752569 | -0.6025 | 0.159317668 | 0.439880899 |
| WBGene00018133 |         | F37A4.3    | -3.285361522 | -0.6025 | 0.183389254 | 0.489403914 |
| WBGene00019904 | twk-49  | R05G9.2    | -4.413834195 | -0.6025 | 0.136502635 | 0.439880899 |
| A_12_P159590   |         |            | -4.066723985 | -0.605  | 0.148768395 | 0.439880899 |
| A_12_P159591   |         |            | -5.051546983 | -0.605  | 0.119765292 | 0.439880899 |
| WBGene00000557 | cnc-3   | R09B5.8    | -5.283698613 | -0.605  | 0.114503124 | 0.439880899 |
| WBGene00001721 | grl-12  | F28A12.2   | -3.11281713  | -0.605  | 0.194357707 | 0.50676114  |
| WBGene00006831 | unc-104 | C52E12.2   | -3.479207876 | -0.605  | 0.173890156 | 0.463367002 |
| WBGene00007801 | trpa-1  | C29E6.2    | -5.581670381 | -0.605  | 0.108390492 | 0.439880899 |
| WBGene00007988 | best-8  | C37A5.1    | -4.253620007 | -0.605  | 0.142231793 | 0.439880899 |
| WBGene00009395 | clec-64 | F35C5.7    | -3.709146406 | -0.605  | 0.163110305 | 0.439880899 |
| WBGene00020229 |         | T05A8.3    | -4.835214048 | -0.605  | 0.125123726 | 0.439880899 |
| WBGene00044079 | tag-241 | C34E11.3   | -5.655500943 | -0.605  | 0.106975493 | 0.439880899 |
| A_12_P130711   |         |            | -3.230172736 | -0.6075 | 0.188070438 | 0.489403914 |
| WBGene00000914 | daf-19  | F33H1.1    | -3.990761383 | -0.6075 | 0.152226591 | 0.439880899 |
| WBGene00001454 | flp-11  | K02G10.4   | -3.848089871 | -0.6075 | 0.157870533 | 0.439880899 |
| WBGene00004921 | snt-1   | F31E8.2    | -3.32558914  | -0.6075 | 0.1826744   | 0.489403914 |
| WBGene00007353 |         | C06A1.2    | -3.481389727 | -0.6075 | 0.17449928  | 0.463367002 |
| WBGene00008783 |         | F14B6.2    | -3.965592219 | -0.6075 | 0.153192756 | 0.439880899 |
| WBGene00012099 | acc-4   | T27E9.9    | -4.364615181 | -0.6075 | 0.139187529 | 0.439880899 |
| WBGene00013683 | zoo-1   | Y105E8A.26 | -2.952406852 | -0.6075 | 0.205764324 | 0.50676114  |
| WBGene00018579 | acs-16  | F47G6.2    | -4.99628165  | -0.6075 | 0.121590423 | 0.439880899 |
| WBGene00019074 | cpd-1   | F59A3.1    | -3.132121277 | -0.6075 | 0.193958007 | 0.50676114  |
| WBGene00020657 | lgc-53  | T21F2.1    | -4.4011355   | -0.6075 | 0.13803256  | 0.439880899 |
| WBGene00022499 | set-30  | ZC8.3      | -4.13511598  | -0.6075 | 0.146912445 | 0.439880899 |
| WBGene00022518 | zfh-2   | ZC123.3    | -3.33609127  | -0.6075 | 0.182099334 | 0.489403914 |
| A_12_P130714   |         |            | -3.500945435 | -0.61   | 0.174238648 | 0.463367002 |
| WBGene00000006 | aat-5   | C55C2.5    | -2.773759876 | -0.61   | 0.219918099 | 0.593984595 |
| WBGene00000723 | col-150 | B0024.2    | -3.919785023 | -0.61   | 0.155620779 | 0.439880899 |
| WBGene00001116 | dyc-1   | C33G3.1    | -3.45543014  | -0.61   | 0.176533738 | 0.463367002 |
| WBGene00009958 | madd-4  | F53B6.2    | -4.839737902 | -0.61   | 0.126039883 | 0.439880899 |
| WBGene00014051 | spv-1   | ZK669.1    | -3.919785023 | -0.61   | 0.155620779 | 0.439880899 |
| WBGene00021156 |         | Y46C6.2    | -2.737599337 | -0.61   | 0.222822965 | 0.593984595 |
| WBGene00022283 | lgc-27  | Y74E4A.1   | -3.919785023 | -0.61   | 0.155620779 | 0.439880899 |
| WBGene00044701 |         | AH9.6      | -3.362330787 | -0.61   | 0.181421769 | 0.463367002 |
| WBGene00050974 |         | Y6G8.9     | -3.297463013 | -0.61   | 0.184990703 | 0.489403914 |
| WBGene00004740 | scd-2   | T10H9.2    | -3.775425916 | -0.6125 | 0.162233352 | 0.439880899 |
| WBGene00009058 |         | F22E12.1   | -2.994191451 | -0.6125 | 0.204562738 | 0.50676114  |
| WBGene00009889 |         | F49E11.2   | -3.625161137 | -0.6125 | 0.168958007 | 0.439880899 |
| WBGene00013866 | cbs-1   | ZC373.1    | -4.929691137 | -0.6125 | 0.124247135 | 0.439880899 |
| WBGene00013898 |         | ZC443.3    | -3.812537266 | -0.6125 | 0.160654167 | 0.439880899 |
| WBGene00015824 |         | C16B8.4    | -4.340586064 | -0.6125 | 0.141109977 | 0.439880899 |
| WBGene00016916 |         | C54D2.2    | -2.813557114 | -0.6125 | 0.217695954 | 0.50676114  |
| WBGene00018206 | ugt-61  | F39G3.1    | -4.624040912 | -0.6125 | 0.132459901 | 0.439880899 |
| WBGene00020012 |         | R11G1.6    | -3.751412562 | -0.6125 | 0.163271832 | 0.439880899 |
| WBGene00020846 |         | T27A10.6   | -2.873362169 | -0.6125 | 0.213164914 | 0.50676114  |
| WBGene00021917 |         | Y55D5A.3   | -4.810071477 | -0.6125 | 0.127336985 | 0.439880899 |
| WBGene00006367 | sym-2   | ZK1067.6   | -3.348162117 | -0.615  | 0.183682862 | 0.463367002 |
| WBGene00008987 |         | F20G2.3    | -3.078372002 | -0.615  | 0.199780923 | 0.50676114  |
| WBGene00012226 |         | W03G11.4   | -3.466723554 | -0.615  | 0.177400935 | 0.463367002 |
| WBGene00020880 |         | T28A11.18  | -2.805173135 | -0.615  | 0.219237805 | 0.50676114  |
| WBGene00000481 | cha-1   | ZC416.8    | -3.918230807 | -0.6175 | 0.157596637 | 0.439880899 |
| WBGene00004830 | slo-1   | Y51A2D.19  | -5.047364748 | -0.6175 | 0.122341069 | 0.439880899 |
| WBGene00009018 |         | F21D9.4    | -2.709175692 | -0.6175 | 0.227929108 | 0.593984595 |
| WBGene00011326 |         | T01D3.1    | -4.418345757 | -0.6175 | 0.139758189 | 0.439880899 |
| WBGene00012186 | mlt-11  | W01F3.3    | -2.868733698 | -0.6175 | 0.215251768 | 0.50676114  |
| A_12_P159568   |         |            | -3.32020489  | -0.62   | 0.186735464 | 0.489403914 |
| WBGene00002176 | jip-1   | F56D12.4   | -3.812219251 | -0.62   | 0.162634927 | 0.439880899 |
| WBGene00003995 | pgp-1   | K08E7.9    | -3.330112313 | -0.62   | 0.186179907 | 0.489403914 |
| WBGene00006844 | unc-120 | D1081.2    | -3.792106504 | -0.62   | 0.163497518 | 0.439880899 |
| WBGene00016817 |         | C50E3.6    | -3.590434658 | -0.62   | 0.172681043 | 0.439880899 |

|                |          |           |              |         |             |             |
|----------------|----------|-----------|--------------|---------|-------------|-------------|
| WBGene00019188 |          | H11E01.3  | -2.701501887 | -0.62   | 0.229501968 | 0.593984595 |
| WBGene00019268 |          | H41C03.1  | -3.804127013 | -0.62   | 0.162980888 | 0.439880899 |
| WBGene00045410 |          | E01G4.7   | -3.050177247 | -0.62   | 0.203266876 | 0.50676114  |
| WBGene00001500 | ftn-1    | C54F6.14  | -2.751783313 | -0.6225 | 0.22621694  | 0.593984595 |
| WBGene00004212 | ptl-1    | F42G9.9   | -3.824790989 | -0.6225 | 0.162753991 | 0.439880899 |
| WBGene00005644 | srp-3    | Y32G9A.4  | -3.398384737 | -0.6225 | 0.183175258 | 0.463367002 |
| WBGene00020678 |          | T22B11.4  | -3.346827239 | -0.6225 | 0.185997052 | 0.463367002 |
| WBGene00002087 | ins-4    | ZK75.1    | -3.432022903 | -0.625  | 0.182108342 | 0.463367002 |
| WBGene00008999 |          | F21A10.2  | -3.920496794 | -0.625  | 0.159418572 | 0.439880899 |
| WBGene00011422 |          | T04B2.3   | -4.460697844 | -0.625  | 0.140112606 | 0.439880899 |
| WBGene00016539 | trim-9   | C39F7.2   | -5.755660392 | -0.625  | 0.108588756 | 0.439880899 |
| WBGene00000170 | aqp-2    | C01G6.1   | -4.295605947 | -0.6275 | 0.146079507 | 0.439880899 |
| WBGene00000526 | clc-5    | C01C10.4  | -5.186702008 | -0.6275 | 0.120982466 | 0.439880899 |
| WBGene00001805 | gur-4    | K09E4.5   | -4.746348417 | -0.6275 | 0.132206898 | 0.439880899 |
| WBGene00003746 | nlp-8    | D2005.2   | -3.531398952 | -0.6275 | 0.17769162  | 0.463367002 |
| WBGene00010321 |          | F59B10.5  | -6.20125978  | -0.6275 | 0.101189117 | 0           |
| WBGene00012252 |          | W04E12.7  | -4.358910032 | -0.6275 | 0.143958007 | 0.439880899 |
| WBGene00013882 |          | ZC410.5   | -4.317359357 | -0.6275 | 0.145343472 | 0.439880899 |
| WBGene00014206 | nit-1    | ZK1058.6  | -3.104473949 | -0.6275 | 0.202127642 | 0.50676114  |
| WBGene00014989 | best-23  | ZK675.3   | -2.758051317 | -0.6275 | 0.227515709 | 0.593984595 |
| WBGene00019230 | tlll-11  | H23L24.3  | -4.209743718 | -0.6275 | 0.149058955 | 0.439880899 |
| A_12_P130061   |          |           | -3.118145673 | -0.63   | 0.202043158 | 0.50676114  |
| A_12_P167754   |          |           | -2.965260004 | -0.63   | 0.21246029  | 0.50676114  |
| WBGene00001053 | dop-2    | K09G1.4   | -3.568722931 | -0.63   | 0.176533738 | 0.439880899 |
| WBGene00001374 | exp-2    | F12F3.1   | -3.615730531 | -0.63   | 0.174238648 | 0.439880899 |
| WBGene00001759 | gst-11   | R11G1.3   | -5.229770408 | -0.63   | 0.120464179 | 0.439880899 |
| WBGene00006575 | tir-1    | F13B10.1  | -2.70629012  | -0.63   | 0.232791006 | 0.593984595 |
| WBGene00008358 | nspc-18  | D1025.7   | -2.843747825 | -0.63   | 0.221538631 | 0.50676114  |
| WBGene00018115 |          | F36H9.7   | -3.304972178 | -0.63   | 0.190621877 | 0.489403914 |
| WBGene00019520 |          | K08B12.1  | -2.839619514 | -0.63   | 0.221860709 | 0.50676114  |
| WBGene00020051 |          | R13A5.9   | -5.557409771 | -0.63   | 0.113362164 | 0.439880899 |
| WBGene00002991 | lin-2    | F17E5.1   | -3.896616241 | -0.6325 | 0.162320321 | 0.439880899 |
| WBGene00003001 | lin-12   | R107.8    | -3.564050121 | -0.6325 | 0.17746664  | 0.439880899 |
| WBGene00003751 | nlp-13   | E03D2.1   | -3.194263308 | -0.6325 | 0.198011228 | 0.489403914 |
| WBGene00003909 | pag-3    | F45B8.4   | -4.593905394 | -0.6325 | 0.137682417 | 0.439880899 |
| WBGene00007900 |          | C33D9.6   | -6.110467775 | -0.6325 | 0.103510897 | 0           |
| WBGene00011019 |          | R05A10.2  | -4.027473124 | -0.6325 | 0.157046361 | 0.439880899 |
| WBGene00011223 |          | R10H10.4  | -3.324681696 | -0.6325 | 0.190243776 | 0.489403914 |
| WBGene00016407 |          | C34D10.2  | -2.722677462 | -0.6325 | 0.23230809  | 0.593984595 |
| WBGene00017557 | nep-11   | F18A12.8  | -2.756351345 | -0.6325 | 0.229470021 | 0.593984595 |
| WBGene00020930 | hlh-30   | W02C12.3  | -3.494218257 | -0.6325 | 0.181013306 | 0.463367002 |
| WBGene00017866 | stn-2    | F27D9.8   | -5.745444056 | -0.635  | 0.110522354 | 0.439880899 |
| WBGene00044330 | alr-1    | R08B4.2   | -2.930212957 | -0.635  | 0.216707799 | 0.50676114  |
| A_12_P173491   |          |           | -3.100910975 | -0.6375 | 0.205584748 | 0.50676114  |
| WBGene00012540 |          | Y37A1B.7  | -3.395882648 | -0.6375 | 0.187727335 | 0.463367002 |
| WBGene00000631 | col-54   | F33D11.3  | -3.110693702 | -0.64   | 0.20574189  | 0.50676114  |
| WBGene00001777 | gst-29   | Y53F4B.32 | -2.980545663 | -0.64   | 0.214725783 | 0.50676114  |
| WBGene00003759 | nlp-21   | Y47D3B.2  | -5.038933085 | -0.64   | 0.127011014 | 0.439880899 |
| WBGene00017571 | jmjd-3.1 | F18E9.5   | -5.141347255 | -0.64   | 0.124480991 | 0.439880899 |
| WBGene00044467 |          | R05C11.4  | -4.357488522 | -0.64   | 0.146873594 | 0.439880899 |
| WBGene00003648 | nhr-58   | R11G11.2  | -6.906124016 | -0.6425 | 0.093033371 | 0           |
| WBGene00006683 | twk-31   | Y47D3B.5  | -3.451769865 | -0.6425 | 0.186136395 | 0.463367002 |
| WBGene00011798 |          | T16G1.4   | -3.127054775 | -0.6425 | 0.205464901 | 0.50676114  |
| WBGene00015436 |          | C04E12.6  | -3.691775566 | -0.6425 | 0.174035498 | 0.439880899 |
| WBGene00018803 | fbxa-24  | F54D10.2  | -3.708341325 | -0.6425 | 0.173258054 | 0.439880899 |
| WBGene00019185 |          | H10E21.5  | -2.878384136 | -0.6425 | 0.223215516 | 0.50676114  |
| WBGene00003754 | nlp-16   | T13A10.5  | -3.202641332 | -0.645  | 0.201396264 | 0.489403914 |
| WBGene00005936 | srx-45   | K01B6.2   | -3.516938182 | -0.645  | 0.183398162 | 0.463367002 |
| WBGene00008549 | din-1    | F07A11.6  | -3.248962577 | -0.645  | 0.198524909 | 0.489403914 |
| WBGene00010632 |          | K07C5.9   | -6.342476151 | -0.645  | 0.101695298 | 0           |
| WBGene00016355 | lact-5   | C33F10.7  | -3.138192459 | -0.645  | 0.205532327 | 0.50676114  |
| WBGene00018837 |          | F54G2.1   | -4.048230178 | -0.645  | 0.159328885 | 0.439880899 |
| A_12_P161554   |          |           | -5.564926816 | -0.6475 | 0.116353731 | 0.439880899 |
| WBGene00000403 | casy-1   | B0034.3   | -3.510371415 | -0.6475 | 0.184453416 | 0.463367002 |
| WBGene00004202 | pry-1    | C37A5.9   | -2.755324487 | -0.6475 | 0.234999545 | 0.593984595 |
| WBGene00007104 |          | B0024.15  | -4.001920597 | -0.6475 | 0.161797313 | 0.439880899 |
| WBGene00009932 |          | F52D10.6  | -3.687908486 | -0.6475 | 0.175573771 | 0.439880899 |
| WBGene00010446 |          | K01A6.4   | -4.474556619 | -0.6475 | 0.144707075 | 0.439880899 |
| WBGene00010607 |          | K06G5.3   | -3.934867212 | -0.6475 | 0.164554473 | 0.439880899 |
| WBGene00015067 |          | B0238.1   | -3.470855044 | -0.6475 | 0.186553455 | 0.463367002 |

|                |         |           |              |         |             |             |
|----------------|---------|-----------|--------------|---------|-------------|-------------|
| WBGene00017039 | trk-1   | D1073.1   | -3.284778168 | -0.6475 | 0.197121378 | 0.489403914 |
| WBGene00018738 |         | F53B1.6   | -3.499677201 | -0.6475 | 0.185017064 | 0.463367002 |
| WBGene00019407 |         | K05F1.5   | -3.416868135 | -0.6475 | 0.189501021 | 0.463367002 |
| A_12_P178849   |         |           | -4.397808061 | -0.65   | 0.147800902 | 0.439880899 |
| WBGene00000246 | bcc-1   | M7.3      | -5.157097764 | -0.65   | 0.126039883 | 0.439880899 |
| WBGene00000431 | ceh-6   | K02B12.1  | -3.549032992 | -0.65   | 0.183148481 | 0.463367002 |
| WBGene00002974 | lev-1   | F09E8.7   | -3.436672339 | -0.65   | 0.189136448 | 0.463367002 |
| WBGene00008177 |         | C48D1.1   | -3.079343388 | -0.65   | 0.211083961 | 0.50676114  |
| WBGene00016028 | flp-24  | C24A1.1   | -2.709965739 | -0.65   | 0.239855431 | 0.593984595 |
| WBGene00016172 |         | C27H5.2   | -6.627190134 | -0.65   | 0.098080783 | 0           |
| WBGene00020126 | flp-26  | R173.4    | -3.273628149 | -0.65   | 0.198556455 | 0.489403914 |
| WBGene00020673 |         | T22B7.4   | -5.016529043 | -0.65   | 0.129571661 | 0.439880899 |
| WBGene00020741 |         | T23F4.3   | -3.096315393 | -0.65   | 0.209926935 | 0.50676114  |
| A_12_P159567   |         |           | -3.13053668  | -0.6525 | 0.208430715 | 0.50676114  |
| WBGene00012818 |         | Y43F8B.7  | -3.065098093 | -0.6525 | 0.212880626 | 0.50676114  |
| WBGene00015464 |         | C05C8.7   | -2.929472609 | -0.6525 | 0.222736338 | 0.50676114  |
| WBGene00017660 |         | F21C10.11 | -3.228158171 | -0.6525 | 0.202127642 | 0.489403914 |
| WBGene00020245 |         | T05B11.1  | -2.971144508 | -0.6525 | 0.219612341 | 0.50676114  |
| WBGene00021268 |         | Y23B4A.2  | -3.686121898 | -0.6525 | 0.177015307 | 0.439880899 |
| A_12_P130713   |         |           | -3.106850439 | -0.655  | 0.210824439 | 0.50676114  |
| A_12_P161553   |         |           | -4.949023866 | -0.655  | 0.132349331 | 0.439880899 |
| WBGene00000443 | ceh-20  | F31E3.1   | -3.231583981 | -0.655  | 0.202686981 | 0.489403914 |
| WBGene00000482 | chd-3   | T14G8.1   | -3.955812194 | -0.655  | 0.165579145 | 0.439880899 |
| WBGene00001172 | egl-3   | C51E3.7   | -4.601603377 | -0.655  | 0.14234169  | 0.439880899 |
| WBGene00007452 |         | C08F11.3  | -2.808551367 | -0.655  | 0.233216315 | 0.50676114  |
| WBGene00011971 | Iron-9  | T23G11.6  | -5.52744217  | -0.655  | 0.118499657 | 0.439880899 |
| WBGene00012289 |         | W05H12.1  | -4.261998587 | -0.655  | 0.153683768 | 0.439880899 |
| WBGene00018074 |         | F35H12.1  | -3.843419866 | -0.655  | 0.170421141 | 0.439880899 |
| WBGene00021059 | atat-2  | W06B11.1  | -3.065297978 | -0.655  | 0.213682325 | 0.50676114  |
| WBGene00021163 | nhr-275 | Y5H2A.2   | -3.441581337 | -0.655  | 0.190319489 | 0.463367002 |
| A_12_P171548   |         |           | -4.876990726 | -0.6575 | 0.134816742 | 0.439880899 |
| WBGene00003029 | lin-44  | E01A2.3   | -4.065923846 | -0.6575 | 0.161709866 | 0.439880899 |
| WBGene00003168 | mec-4   | T01C8.7   | -6.101250928 | -0.6575 | 0.107764786 | 0           |
| WBGene00003969 | pef-1   | F23H11.8  | -3.490948569 | -0.6575 | 0.188344224 | 0.463367002 |
| WBGene00016974 | Iron-15 | C56E6.6   | -3.406035716 | -0.6575 | 0.193039667 | 0.463367002 |
| WBGene00003750 | nlp-12  | M01D7.5   | -2.913108083 | -0.66   | 0.22656214  | 0.50676114  |
| WBGene00007053 | chd-7   | T04D1.4   | -3.218221782 | -0.66   | 0.205082199 | 0.489403914 |
| WBGene00013418 |         | Y65A5A.1  | -3.707082624 | -0.66   | 0.178037575 | 0.439880899 |
| WBGene00016659 |         | C45B2.2   | -3.378315138 | -0.66   | 0.195363657 | 0.463367002 |
| WBGene00020887 |         | T28B4.4   | -3.691647985 | -0.66   | 0.178781943 | 0.439880899 |
| WBGene00003706 | nhr-116 | F09C6.9   | -5.476000128 | -0.6625 | 0.120982466 | 0.439880899 |
| WBGene00004777 | ser-2   | C02D4.2   | -3.575324132 | -0.6625 | 0.185297885 | 0.439880899 |
| WBGene00011763 |         | T14B1.1   | -3.151178556 | -0.6625 | 0.210238801 | 0.489403914 |
| WBGene00015231 | cutl-14 | B0511.5   | -4.698639398 | -0.6625 | 0.140998264 | 0.439880899 |
| WBGene00000952 | del-1   | E02H4.1   | -5.689939293 | -0.665  | 0.116872952 | 0.439880899 |
| WBGene00007073 | ugt-2   | AC3.8     | -4.327067268 | -0.665  | 0.153683768 | 0.439880899 |
| WBGene00007316 | nlp-41  | C04H5.8   | -3.41353019  | -0.665  | 0.194812983 | 0.463367002 |
| WBGene00007408 |         | C07B5.3   | -3.183237266 | -0.665  | 0.208906828 | 0.489403914 |
| WBGene00007531 |         | C11H1.7   | -2.892752601 | -0.665  | 0.229884851 | 0.50676114  |
| WBGene00010722 |         | K09E4.4   | -4.862710836 | -0.665  | 0.136754996 | 0.439880899 |
| WBGene00020045 | glb-23  | R13A1.8   | -3.654566236 | -0.665  | 0.181964139 | 0.439880899 |
| WBGene00022076 | daao-1  | Y69A2AR.5 | -4.488430918 | -0.665  | 0.14815868  | 0.439880899 |
| A_12_P178594   |         |           | -3.406163098 | -0.6675 | 0.195968302 | 0.463367002 |
| WBGene00001788 | gst-40  | F56B3.10  | -3.716122537 | -0.6675 | 0.17962271  | 0.439880899 |
| WBGene00007214 |         | C01A2.2   | -3.16365257  | -0.6675 | 0.210990298 | 0.489403914 |
| WBGene00009779 |         | F46C5.2   | -3.441466589 | -0.6675 | 0.193958007 | 0.463367002 |
| WBGene00015935 |         | C17H12.10 | -7.249494633 | -0.6675 | 0.092075384 | 0           |
| WBGene00016294 |         | C31H2.4   | -3.997296735 | -0.6675 | 0.166987853 | 0.439880899 |
| WBGene00022696 |         | ZK328.7   | -3.48534254  | -0.6675 | 0.191516327 | 0.463367002 |
| A_12_P130091   |         |           | -3.542416103 | -0.67   | 0.189136448 | 0.463367002 |
| A_12_P172497   |         |           | -3.236829125 | -0.67   | 0.2069927   | 0.489403914 |
| WBGene00000932 | dao-6   | T05G5.12  | -2.80860087  | -0.67   | 0.238552942 | 0.50676114  |
| WBGene00003089 | ltd-1   | K02C4.4   | -4.807227212 | -0.67   | 0.139373483 | 0.439880899 |
| WBGene00010311 |         | F59B2.9   | -4.651964266 | -0.67   | 0.144025182 | 0.439880899 |
| WBGene00014099 |         | ZK836.3   | -3.022837336 | -0.67   | 0.221646065 | 0.50676114  |
| WBGene00015276 |         | C01B7.5   | -3.580007357 | -0.67   | 0.187150453 | 0.439880899 |
| WBGene00017980 |         | F32B5.7   | -3.594641559 | -0.67   | 0.186388542 | 0.439880899 |
| WBGene00019104 | asp-7   | F59D6.2   | -5.202897318 | -0.67   | 0.128774404 | 0.439880899 |
| WBGene00020331 |         | T07H6.4   | -3.638456272 | -0.67   | 0.18414403  | 0.439880899 |
| WBGene00021775 |         |           | -4.295041204 | -0.67   | 0.155993847 | 0.439880899 |

|                 |          |            |              |         |             |             |
|-----------------|----------|------------|--------------|---------|-------------|-------------|
| WBGene00022100  |          | Y69A2AR.31 | -2.831137773 | -0.67   | 0.236653972 | 0.50676114  |
| WBGene00011817  |          | T16H12.9   | -4.336094137 | -0.6725 | 0.155093496 | 0.439880899 |
| WBGene00012648  |          | Y39A1A.9   | -2.774318304 | -0.6725 | 0.24240189  | 0.593984595 |
| WBGene00020379  |          | T09B4.5    | -3.490894276 | -0.6725 | 0.192644047 | 0.463367002 |
| WBGene00000220  | atf-2    | K08F8.2    | -3.509744539 | -0.675  | 0.19232169  | 0.463367002 |
| WBGene00001461  | flp-18   | Y48D7A.2   | -3.814651266 | -0.675  | 0.176949334 | 0.439880899 |
| WBGene00009475  |          | F36F2.1    | -2.835613222 | -0.675  | 0.238043748 | 0.50676114  |
| WBGene00011382  | dop-5    | T02E9.3    | -3.299599532 | -0.675  | 0.20457028  | 0.489403914 |
| WBGene00011760  |          | T13H5.6    | -3.325246077 | -0.675  | 0.202992496 | 0.489403914 |
| WBGene00017936  |          | F30B5.7    | -2.810538075 | -0.675  | 0.240167534 | 0.50676114  |
| WBGene00020946  |          | W02D7.11   | -3.188659371 | -0.675  | 0.21168771  | 0.489403914 |
| A_12_P157859    |          |            | -2.911981554 | -0.6775 | 0.232659441 | 0.50676114  |
| A_12_P159569    |          |            | -3.107424729 | -0.6775 | 0.218026198 | 0.50676114  |
| WBGene00006681  | twk-29   | F46A9.3    | -5.016284583 | -0.6775 | 0.13506012  | 0.439880899 |
| WBGene00008307  | ncs-5    | C54E10.2   | -3.306098752 | -0.6775 | 0.204924308 | 0.489403914 |
| WBGene00009387  | glb-15   | F35B12.8   | -3.796830873 | -0.6775 | 0.178438288 | 0.439880899 |
| WBGene000015293 |          | C01C4.3    | -6.422861986 | -0.6775 | 0.105482572 | 0           |
| WBGene00044663  |          | F26G1.10   | -2.828944774 | -0.6775 | 0.239488592 | 0.50676114  |
| WBGene00002222  | klp-11   | F20C5.2    | -3.130268252 | -0.68   | 0.217233778 | 0.50676114  |
| WBGene00004364  | ric-4    | Y22F5A.3   | -3.43017428  | -0.68   | 0.198240656 | 0.463367002 |
| WBGene00006580  | tlp-1    | T23G4.1    | -5.456393858 | -0.68   | 0.124624435 | 0.439880899 |
| WBGene00009038  |          | F22B3.7    | -4.150380125 | -0.68   | 0.163840415 | 0.439880899 |
| WBGene00016196  |          | C28H8.5    | -4.141742406 | -0.68   | 0.164182108 | 0.439880899 |
| WBGene00010759  | cysl-2   | K10H10.2   | -4.936171867 | -0.6825 | 0.13826504  | 0.439880899 |
| WBGene00017991  | clec-180 | F32E10.3   | -3.605432613 | -0.6825 | 0.189297672 | 0.439880899 |
| WBGene00003006  | lin-17   | Y71F9B.5   | -4.270587466 | -0.685  | 0.160399478 | 0.439880899 |
| WBGene00011869  | dod-6    | T20G5.7    | -2.954991414 | -0.685  | 0.231811164 | 0.50676114  |
| WBGene00077439  |          | F55B12.10  | -4.479580951 | -0.685  | 0.152916089 | 0.439880899 |
| A_12_P161555    |          |            | -5.495341365 | -0.6875 | 0.125105968 | 0.439880899 |
| WBGene00001710  | grl-1    | C24G6.7    | -5.552733369 | -0.6875 | 0.123812896 | 0.439880899 |
| WBGene00008437  |          |            | -3.593526242 | -0.6875 | 0.19131626  | 0.439880899 |
| WBGene00009800  | rrc-1    | F47A4.3    | -5.61953565  | -0.6875 | 0.122341069 | 0.439880899 |
| WBGene00011070  |          | R06F6.7    | -2.978195376 | -0.6875 | 0.230844492 | 0.50676114  |
| WBGene00016456  |          | C35E7.4    | -3.793494118 | -0.6875 | 0.181231334 | 0.439880899 |
| WBGene00022825  |          | ZK816.1    | -3.342173022 | -0.6875 | 0.205704491 | 0.489403914 |
| WBGene00045409  |          |            | -5.18039306  | -0.6875 | 0.132711937 | 0.439880899 |
| WBGene00000740  | col-167  | T10E10.2   | -3.690961915 | -0.69   | 0.186943137 | 0.439880899 |
| WBGene00000741  | col-168  | T10E10.1   | -3.704708085 | -0.69   | 0.186249492 | 0.439880899 |
| WBGene00001447  | flp-4    | C18D1.3    | -3.38644807  | -0.69   | 0.203753309 | 0.463367002 |
| WBGene00007750  | syg-2    | C26G2.1    | -4.369093643 | -0.69   | 0.157927492 | 0.439880899 |
| WBGene00008897  |          | F16H6.7    | -5.272065295 | -0.69   | 0.1308785   | 0.439880899 |
| WBGene00016423  | tag-275  | C34H3.1    | -3.708867566 | -0.69   | 0.186040614 | 0.439880899 |
| WBGene00002069  | ikb-1    | C04F12.3   | -4.230266807 | -0.6925 | 0.163701258 | 0.439880899 |
| WBGene00004088  | ppk-2    | Y48G9A.8   | -3.51420118  | -0.6925 | 0.197057586 | 0.463367002 |
| WBGene00004719  | sad-1    | F15A2.6    | -3.285735868 | -0.6925 | 0.210759485 | 0.489403914 |
| WBGene00022591  | cuti-1   | ZC328.1    | -2.96245426  | -0.6925 | 0.233758883 | 0.50676114  |
| WBGene00023500  |          | C11H1.9    | -3.602133419 | -0.6925 | 0.192247182 | 0.439880899 |
| WBGene00023416  | isl-1    | R10H1.4    | -2.95939152  | -0.6975 | 0.235690342 | 0.50676114  |
| WBGene00045102  |          | F52B11.8   | -6.34510005  | -0.6975 | 0.109927345 | 0           |
| WBGene00000068  | acy-1    | F17C8.1    | -5.125315676 | -0.7    | 0.136576953 | 0.439880899 |
| WBGene00000288  | cal-4    | T07G12.1   | -3.256564768 | -0.7    | 0.214950431 | 0.489403914 |
| WBGene00001459  | flp-16   | F15D4.8    | -2.793042107 | -0.7    | 0.250622788 | 0.50676114  |
| WBGene00007397  |          | C07A4.2    | -4.028226582 | -0.7    | 0.17377374  | 0.439880899 |
| WBGene00010078  |          |            | -2.791530651 | -0.7    | 0.250758486 | 0.50676114  |
| WBGene00013312  | hhat-2   | Y57G11C.17 | -2.854770064 | -0.7    | 0.245203636 | 0.50676114  |
| WBGene00016504  |          | C37C3.12   | -2.74885837  | -0.7    | 0.25465117  | 0.593984595 |
| WBGene00017255  |          | F08D12.12  | -5.01426555  | -0.7    | 0.139601701 | 0.439880899 |
| WBGene00044350  |          | Y73B6BL.44 | -4.341396106 | -0.7    | 0.161238455 | 0.439880899 |
| A_12_P162823    |          |            | -4.761693892 | -0.7025 | 0.147531533 | 0.439880899 |
| WBGene00006467  | magu-2   | C01B7.4    | -3.513193792 | -0.7025 | 0.199960504 | 0.463367002 |
| WBGene00013962  |          | ZK287.1    | -5.253882565 | -0.7025 | 0.13371064  | 0.439880899 |
| WBGene00019753  |          | M03E7.1    | -2.885888302 | -0.705  | 0.244292199 | 0.50676114  |
| WBGene00045411  |          | C25F9.11   | -2.93077273  | -0.705  | 0.240550894 | 0.50676114  |
| WBGene00001760  | gst-12   | F37B1.2    | -2.772833151 | -0.7075 | 0.255154191 | 0.593984595 |
| WBGene00009848  |          | F48F5.6    | -3.227189784 | -0.7075 | 0.219230987 | 0.489403914 |
| WBGene00013273  | 41338    | Y57A10B.1  | -4.683798009 | -0.7075 | 0.151052628 | 0.439880899 |
| WBGene00020497  |          | T14A8.2    | -3.963303874 | -0.7075 | 0.178512681 | 0.439880899 |
| A_12_P159566    |          |            | -3.462026463 | -0.71   | 0.205082199 | 0.463367002 |
| WBGene00004004  | pgp-10   | C54D1.1    | -2.883525359 | -0.71   | 0.246226376 | 0.50676114  |
| WBGene00011673  | cyp-13A6 | T10B9.3    | -5.849292711 | -0.71   | 0.121382197 | 0           |

|                |          |            |              |         |             |             |
|----------------|----------|------------|--------------|---------|-------------|-------------|
| WBGene00016671 |          | C45G7.4    | -2.836017192 | -0.71   | 0.250351092 | 0.50676114  |
| WBGene00017193 |          | F07C3.2    | -3.457975507 | -0.71   | 0.205322449 | 0.463367002 |
| WBGene00017314 | lgc-39   | F09G2.5    | -2.707371203 | -0.71   | 0.262247009 | 0.593984595 |
| WBGene00001064 | dpy-2    | T14B4.6    | -3.05126582  | -0.7125 | 0.233509646 | 0.50676114  |
| WBGene00001091 | drh-2    | C01B10.1   | -3.829271072 | -0.7125 | 0.186066744 | 0.439880899 |
| WBGene00004944 | sol-1    | C15A11.3   | -3.310077344 | -0.7125 | 0.215251768 | 0.489403914 |
| WBGene00011498 |          | T05G5.1    | -3.968275035 | -0.7125 | 0.179549047 | 0.439880899 |
| WBGene00044728 |          | Y53F4B.45  | -4.108664941 | -0.7125 | 0.173413995 | 0.439880899 |
| A_12_P159565   |          |            | -4.951513494 | -0.715  | 0.144400293 | 0.439880899 |
| WBGene00006444 | shn-1    | C33B4.3    | -2.844946565 | -0.715  | 0.251322822 | 0.50676114  |
| WBGene00008760 |          | F13E9.11   | -5.423178962 | -0.715  | 0.131841491 | 0.439880899 |
| WBGene00016481 |          | C36C5.12   | -3.311269055 | -0.715  | 0.215929297 | 0.489403914 |
| WBGene00020317 | pdf-1    | T07E3.6    | -4.102657086 | -0.715  | 0.1742773   | 0.439880899 |
| WBGene00021948 | kvs-5    | Y55F3C.3   | -3.26292301  | -0.715  | 0.219128676 | 0.489403914 |
| WBGene00000969 | dhs-5    | F56D1.5    | -6.02351491  | -0.7175 | 0.119116498 | 0           |
| WBGene00004122 | pqn-35   | F35D11.2   | -2.774433266 | -0.7175 | 0.258611374 | 0.593984595 |
| WBGene00006650 | tts-1    | F09E10.11  | -4.399154402 | -0.7175 | 0.163099527 | 0.439880899 |
| WBGene00006982 | zig-5    | Y48A6A.1   | -3.48699904  | -0.7175 | 0.205764324 | 0.463367002 |
| WBGene00008027 | scl-5    | C39E9.2    | -4.324780047 | -0.7175 | 0.165904391 | 0.439880899 |
| WBGene00013891 |          | ZC434.3    | -2.976895035 | -0.7175 | 0.241022942 | 0.50676114  |
| WBGene00018472 | nep-16   | F45E4.7    | -3.308476782 | -0.7175 | 0.216867171 | 0.489403914 |
| WBGene00019967 | cyp-33C8 | R08F11.3   | -4.380691787 | -0.7175 | 0.163786917 | 0.439880899 |
| WBGene00011004 |          | R04B5.6    | -4.101509444 | -0.72   | 0.175545128 | 0.439880899 |
| WBGene00013458 |          | Y67A10A.9  | -3.123359656 | -0.72   | 0.230521003 | 0.50676114  |
| WBGene00015969 | glb-6    | C18C4.9    | -2.837287906 | -0.72   | 0.253763461 | 0.50676114  |
| WBGene00019283 |          | K01A2.9    | -3.716374027 | -0.72   | 0.193737227 | 0.439880899 |
| WBGene00000990 | dhs-27   | C04F6.5    | -3.641802768 | -0.7225 | 0.198390755 | 0.439880899 |
| WBGene00011107 |          | R07E3.6    | -3.560449531 | -0.7225 | 0.202923814 | 0.439880899 |
| WBGene00012317 | ztf-6    | W06H12.1   | -2.907970905 | -0.7225 | 0.248455031 | 0.50676114  |
| WBGene00013848 | npr-29   | ZC84.4     | -4.386118629 | -0.7225 | 0.164724227 | 0.439880899 |
| WBGene00015763 |          | C14C6.12   | -3.751726781 | -0.7225 | 0.192577989 | 0.439880899 |
| WBGene00022615 |          | ZC449.5    | -2.981752863 | -0.7225 | 0.242307137 | 0.50676114  |
| WBGene00023414 |          | R01H2.7    | -3.149261139 | -0.7225 | 0.229418892 | 0.489403914 |
| WBGene00007174 | mboa-1   | B0395.2    | -4.161883311 | -0.725  | 0.174199983 | 0.439880899 |
| WBGene00009036 |          | F22B3.5    | -3.642689947 | -0.725  | 0.199028743 | 0.439880899 |
| WBGene00015393 |          | C03G6.5    | -2.82866739  | -0.725  | 0.256304436 | 0.50676114  |
| WBGene00022024 |          | Y64H9A.2   | -2.765242497 | -0.725  | 0.262183154 | 0.593984595 |
| WBGene00012131 |          | T28F3.5    | -7.646261881 | -0.7275 | 0.095144531 | 0           |
| WBGene00119203 |          | T04A8.18   | -5.306539666 | -0.7275 | 0.13709499  | 0.439880899 |
| WBGene00022416 |          | Y102A11A.6 | -3.856878536 | -0.73   | 0.18927223  | 0.439880899 |
| WBGene00000691 | col-117  | T28C6.4    | -3.589293391 | -0.7325 | 0.204079166 | 0.439880899 |
| WBGene00003143 | max-1    | C34B4.1    | -4.380031803 | -0.7325 | 0.167236229 | 0.439880899 |
| WBGene00006832 | unc-105  | C41C4.5    | -3.555766561 | -0.7325 | 0.2060034   | 0.463367002 |
| WBGene00007530 |          | C11H1.5    | -5.611391352 | -0.7325 | 0.130538035 | 0.439880899 |
| WBGene00015356 | tag-278  | C02F12.7   | -3.922115574 | -0.7325 | 0.186761443 | 0.439880899 |
| WBGene00015601 | fbxa-166 | C08E3.9    | -3.969672904 | -0.7325 | 0.184524019 | 0.439880899 |
| A_12_P163053   |          |            | -3.464594653 | -0.735  | 0.21214603  | 0.463367002 |
| A_12_P178909   |          |            | -3.680181631 | -0.735  | 0.199718404 | 0.439880899 |
| WBGene00001490 | frm-3    | H05G16.1   | -5.374575134 | -0.735  | 0.136754996 | 0.439880899 |
| WBGene00003755 | nlp-17   | Y45F10A.5  | -3.156998781 | -0.735  | 0.232816054 | 0.489403914 |
| WBGene00020805 |          | T25F10.1   | -3.191596451 | -0.735  | 0.230292273 | 0.489403914 |
| WBGene00008563 |          | F07H5.13   | -3.652016174 | -0.7375 | 0.201943246 | 0.439880899 |
| WBGene00008971 |          | F20C5.6    | -4.42088165  | -0.7375 | 0.166821928 | 0.439880899 |
| WBGene00013084 |          |            | -4.454346072 | -0.7375 | 0.165568635 | 0.439880899 |
| WBGene00013387 |          | Y62F5A.9   | -4.575530733 | -0.7375 | 0.161183487 | 0.439880899 |
| A_12_P108315   |          |            | -2.9436284   | -0.74   | 0.251390427 | 0.50676114  |
| WBGene00006309 | sul-2    | D1014.1    | -2.91151226  | -0.74   | 0.25416345  | 0.50676114  |
| WBGene00007736 | igdb-2   | C25G4.10   | -4.93581549  | -0.74   | 0.149924567 | 0.439880899 |
| WBGene00016221 |          | C29F9.6    | -3.705797113 | -0.74   | 0.199687133 | 0.439880899 |
| WBGene00020626 |          | T20F5.4    | -3.572959069 | -0.74   | 0.207111245 | 0.439880899 |
| WBGene00001705 | grd-16   | Y69A2AL.1  | -3.997999609 | -0.7425 | 0.185717877 | 0.439880899 |
| WBGene00009304 | eva-1    | F32A7.3    | -3.876954062 | -0.7425 | 0.191516327 | 0.439880899 |
| WBGene00015883 |          | C17B7.9    | -3.983057203 | -0.7425 | 0.186414596 | 0.439880899 |
| WBGene00020250 |          | T05C1.3    | -3.434306701 | -0.7425 | 0.216200842 | 0.463367002 |
| WBGene00020650 |          | T21D12.11  | -4.95125436  | -0.7425 | 0.149961999 | 0.439880899 |
| WBGene00019426 | cutl-16  | K06A1.3    | -4.023409594 | -0.745  | 0.185166333 | 0.439880899 |
| A_12_P177940   |          |            | -4.56863736  | -0.7475 | 0.163615525 | 0.439880899 |
| WBGene00000037 | ace-3    | Y48B6A.8   | -7.318675685 | -0.7475 | 0.102135965 | 0           |
| WBGene00003719 | nhr-129  | C50B6.14   | -3.041342172 | -0.7475 | 0.245779645 | 0.50676114  |
| WBGene00017247 |          | F08D12.3   | -3.146688671 | -0.7475 | 0.237551305 | 0.489403914 |

|                |          |           |              |         |             |             |
|----------------|----------|-----------|--------------|---------|-------------|-------------|
| WBGene00009094 |          | F23H12.5  | -3.384593267 | -0.75   | 0.221592357 | 0.463367002 |
| WBGene00011343 |          |           | -2.721108048 | -0.75   | 0.275623013 | 0.593984595 |
| A_12_P180954   |          |           | -2.933513857 | -0.7525 | 0.256518304 | 0.50676114  |
| WBGene00006970 | zag-1    | F28F9.1   | -8.2315731   | -0.7525 | 0.091416305 | 0           |
| WBGene00016484 |          | C36C5.15  | -3.158687764 | -0.7525 | 0.238231841 | 0.489403914 |
| WBGene00017009 |          | D1007.13  | -2.992078443 | -0.7525 | 0.251497417 | 0.50676114  |
| A_12_P180955   |          |           | -2.701521994 | -0.755  | 0.279472091 | 0.593984595 |
| A_12_P180958   |          |           | -2.778366955 | -0.755  | 0.271742362 | 0.593984595 |
| WBGene00002110 | ins-27   | ZC334.11  | -2.933690677 | -0.755  | 0.257355012 | 0.50676114  |
| WBGene00004924 | snt-4    | T23H2.2   | -4.167407566 | -0.755  | 0.181167786 | 0.439880899 |
| WBGene00007552 |          | C13C12.2  | -3.618107406 | -0.755  | 0.208672633 | 0.439880899 |
| WBGene00009326 |          | F32D8.1   | -4.294355696 | -0.755  | 0.175812171 | 0.439880899 |
| WBGene00011495 |          | T05F1.11  | -3.954462799 | -0.755  | 0.190923531 | 0.439880899 |
| WBGene00019198 |          | H14E04.1  | -5.287866676 | -0.755  | 0.142779694 | 0.439880899 |
| WBGene00019451 | nstp-7   | K06H6.3   | -4.882497769 | -0.755  | 0.154633967 | 0.439880899 |
| WBGene00004006 | pgp-12   | F22E10.1  | -4.210277468 | -0.7575 | 0.179916883 | 0.439880899 |
| WBGene00006370 |          |           | -4.337160696 | -0.7575 | 0.174653432 | 0.439880899 |
| WBGene00006812 | unc-80   | F25C8.3   | -3.707398621 | -0.7575 | 0.204321164 | 0.439880899 |
| WBGene00010705 | cyp-14A1 | K09A11.2  | -3.672868552 | -0.7575 | 0.206242066 | 0.439880899 |
| WBGene00018786 | hmbx-1   | F54A5.1   | -3.928085969 | -0.7575 | 0.192842012 | 0.439880899 |
| WBGene00020368 | ast-1    | T08H4.3   | -4.236345913 | -0.7575 | 0.178809761 | 0.439880899 |
| WBGene00044630 | bus-17   | ZK678.8   | -4.617679333 | -0.7575 | 0.164043439 | 0.439880899 |
| WBGene00008376 |          | D1054.9   | -3.890181068 | -0.76   | 0.195363657 | 0.439880899 |
| WBGene00045246 |          | C29E4.15  | -3.107752187 | -0.76   | 0.244549743 | 0.50676114  |
| WBGene00009653 |          | F43D9.1   | -3.403852102 | -0.7625 | 0.224010908 | 0.463367002 |
| WBGene00009802 |          | F47B8.1   | -3.157976859 | -0.7625 | 0.241452054 | 0.489403914 |
| WBGene00020501 |          | T14B4.5   | -3.157976859 | -0.7625 | 0.241452054 | 0.489403914 |
| WBGene00006363 | syd-1    | F35D2.5   | -4.189218152 | -0.765  | 0.182611641 | 0.439880899 |
| WBGene00010674 |          | K08E7.6   | -5.95612616  | -0.765  | 0.128439187 | 0           |
| WBGene00011926 | sptf-2   | T22C8.5   | -4.37600517  | -0.765  | 0.174816978 | 0.439880899 |
| WBGene00044212 |          | Y68A4A.13 | -2.975072168 | -0.765  | 0.257136619 | 0.50676114  |
| WBGene00003071 | lrp-1    | F29D11.1  | -5.473871923 | -0.7675 | 0.140211538 | 0.439880899 |
| WBGene00008033 |          | C39E9.10  | -5.184274754 | -0.7675 | 0.148043851 | 0.439880899 |
| WBGene00008763 |          | F13G3.3   | -4.206422512 | -0.7675 | 0.182459084 | 0.439880899 |
| WBGene00007607 |          | C15C8.5   | -3.725279506 | -0.77   | 0.2066959   | 0.439880899 |
| WBGene00019968 |          | R08F11.4  | -5.488938922 | -0.77   | 0.140282122 | 0.439880899 |
| WBGene00044921 |          | F53C11.9  | -3.615480417 | -0.77   | 0.21297308  | 0.439880899 |
| WBGene00000743 | col-170  | T10E10.6  | -3.76196247  | -0.7725 | 0.205344951 | 0.439880899 |
| WBGene00001772 | gst-24   | F37B1.1   | -4.390328005 | -0.7725 | 0.175954963 | 0.439880899 |
| WBGene00013568 |          | Y75B12B.3 | -3.164094215 | -0.7725 | 0.244145701 | 0.489403914 |
| A_12_P103575   |          |           | -3.039418516 | -0.775  | 0.254982983 | 0.50676114  |
| WBGene00001079 | dpy-20   | T22B3.1   | -2.857093837 | -0.775  | 0.271254654 | 0.50676114  |
| WBGene00003179 | mec-18   | C52B9.9   | -7.55147935  | -0.775  | 0.102628897 | 0           |
| WBGene00003749 | nlp-11   | ZK1320.10 | -3.696367219 | -0.775  | 0.209665316 | 0.439880899 |
| WBGene00000979 | dhs-16   | C10F3.2   | -2.868438467 | -0.78   | 0.271924955 | 0.50676114  |
| WBGene00006750 | unc-10   | T10A3.1   | -3.765015178 | -0.78   | 0.20717048  | 0.439880899 |
| WBGene00008583 | ugt-65   | F08G5.5   | -3.214266614 | -0.78   | 0.242668109 | 0.489403914 |
| WBGene00001069 | dpy-7    | F46C8.6   | -2.961175733 | -0.7825 | 0.264253145 | 0.50676114  |
| WBGene00001626 | gly-1    | F44F4.6   | -3.022736301 | -0.7825 | 0.258871407 | 0.50676114  |
| WBGene00008538 | sqrd-1   | F02H6.5   | -4.387099859 | -0.7825 | 0.178363845 | 0.439880899 |
| WBGene00009865 |          | F49B2.6   | -4.429969521 | -0.7825 | 0.176637784 | 0.439880899 |
| WBGene00044640 |          | B0432.14  | -3.231269106 | -0.7825 | 0.242164912 | 0.489403914 |
| WBGene00001570 | gei-13   | F58A4.11  | -3.965531924 | -0.785  | 0.197955789 | 0.439880899 |
| WBGene00003112 | mab-21   | F35G12.6  | -3.542111662 | -0.785  | 0.221619213 | 0.463367002 |
| WBGene00010262 |          | F58E10.7  | -3.389326263 | -0.785  | 0.231609452 | 0.463367002 |
| WBGene00010784 | twk-48   | K11H3.7   | -3.823813472 | -0.785  | 0.205292441 | 0.439880899 |
| WBGene00013899 |          | ZC443.4   | -3.300408128 | -0.785  | 0.237849372 | 0.489403914 |
| WBGene00001159 | eff-1    | C26D10.5  | -3.806254469 | -0.7875 | 0.206896309 | 0.439880899 |
| WBGene00001824 | hbl-1    | F13D11.2  | -3.66902938  | -0.7875 | 0.214634422 | 0.439880899 |
| WBGene00006602 | tps-1    | ZK54.2    | -5.041141406 | -0.7875 | 0.156214622 | 0.439880899 |
| WBGene00001089 | dre-1    | K04A8.6   | -3.032698409 | -0.79   | 0.260494086 | 0.50676114  |
| WBGene00005833 | srw-86   | C25F9.7   | -2.966211832 | -0.79   | 0.266332968 | 0.50676114  |
| WBGene00012261 | lpr-3    | W04G3.8   | -3.907679311 | -0.79   | 0.202166027 | 0.439880899 |
| WBGene00016463 |          | C35E7.11  | -6.012456932 | -0.79   | 0.131393873 | 0           |
| WBGene00017983 |          | F32D1.3   | -5.142024485 | -0.79   | 0.153635986 | 0.439880899 |
| WBGene00001448 | flp-5    | C03G5.7   | -3.763305731 | -0.7925 | 0.210586133 | 0.439880899 |
| WBGene00015019 |          | B0205.4   | -3.113521993 | -0.7925 | 0.254534897 | 0.50676114  |
| WBGene00003102 | mab-5    | C08C3.3   | -3.192065843 | -0.795  | 0.249055013 | 0.489403914 |
| WBGene00013073 | hmit-1.1 | Y51A2D.4  | -4.537649926 | -0.795  | 0.175200823 | 0.439880899 |
| WBGene00001133 | eat-2    | Y48B6A.4  | -2.919606663 | -0.7975 | 0.273153233 | 0.50676114  |



|                |           |            |              |         |             |             |
|----------------|-----------|------------|--------------|---------|-------------|-------------|
| WBGene00010790 | sodh-1    | K12G11.3   | -4.13127526  | -0.7975 | 0.193039667 | 0.439880899 |
| A_12_P179607   |           |            | -2.709483454 | -0.8    | 0.295259231 | 0.593984595 |
| WBGene00007818 |           | C30F2.4    | -6.534122418 | -0.8    | 0.122434192 | 0           |
| WBGene00011313 |           | T01B7.8    | -2.979633932 | -0.8    | 0.268489357 | 0.50676114  |
| WBGene00016483 |           | C36C5.14   | -3.220121131 | -0.8    | 0.248437859 | 0.489403914 |
| WBGene00000280 | cah-2     | D1022.8    | -6.08759042  | -0.8025 | 0.131825557 | 0           |
| WBGene00006667 | twk-12    | F29F11.4   | -4.225758967 | -0.8025 | 0.189906714 | 0.439880899 |
| WBGene00020902 | jmjc-1    | T28F2.4    | -5.398426843 | -0.8025 | 0.148654418 | 0.439880899 |
| WBGene00007203 | best-1    | B0564.3    | -4.157220819 | -0.805  | 0.19363898  | 0.439880899 |
| WBGene00018056 |           | F35F10.6   | -3.536508742 | -0.805  | 0.227625621 | 0.463367002 |
| WBGene00021976 |           | Y58A7A.2   | -3.009613025 | -0.805  | 0.267476248 | 0.50676114  |
| WBGene00001113 | dur-1     | F25H8.5    | -6.484130107 | -0.8075 | 0.124534824 | 0           |
| WBGene00014046 | clec-60   | ZK666.6    | -4.387897594 | -0.8075 | 0.184028907 | 0.439880899 |
| WBGene00001444 | flp-1     | F23B2.5    | -4.162693534 | -0.81   | 0.194585547 | 0.439880899 |
| WBGene00001768 | gst-20    | Y48E1B.10  | -4.085942893 | -0.81   | 0.198240656 | 0.439880899 |
| WBGene00012437 | hum-9     | Y11D7A.14  | -4.675897137 | -0.81   | 0.173228789 | 0.439880899 |
| WBGene00016996 |           | D1005.2    | -3.786164553 | -0.81   | 0.213936819 | 0.439880899 |
| WBGene00020616 |           | T20D4.10   | -3.567811971 | -0.81   | 0.227029901 | 0.439880899 |
| WBGene00000398 |           |            | -4.029551177 | -0.8125 | 0.201635359 | 0.439880899 |
| WBGene00001163 | efn-2     | C43F9.8    | -3.379092886 | -0.8125 | 0.240449146 | 0.463367002 |
| WBGene00002182 | kap-1     | F08F8.3    | -3.916996514 | -0.8125 | 0.20742934  | 0.439880899 |
| WBGene00022274 |           | Y73E7A.8   | -4.197551064 | -0.8125 | 0.193565245 | 0.439880899 |
| A_12_P180957   |           |            | -3.018180138 | -0.815  | 0.270030271 | 0.50676114  |
| WBGene00001789 | gst-41    | R13D7.7    | -3.020929563 | -0.815  | 0.269784509 | 0.50676114  |
| WBGene00017060 |           | D2063.1    | -4.952447657 | -0.815  | 0.164565091 | 0.439880899 |
| WBGene00001733 | grl-24    | F11E6.2    | -3.053095246 | -0.8175 | 0.267761054 | 0.50676114  |
| WBGene00010589 | cyp-33D1  | K05D4.4    | -2.713776654 | -0.8175 | 0.301240708 | 0.593984595 |
| WBGene00015757 |           | C14C6.3    | -4.666329126 | -0.8175 | 0.175191243 | 0.439880899 |
| WBGene00016106 |           | C25F6.7    | -3.522846408 | -0.8175 | 0.232056668 | 0.463367002 |
| WBGene00020083 |           | R57.2      | -2.721809321 | -0.8175 | 0.300351679 | 0.593984595 |
| WBGene00000992 | dhs-29    | F27D9.6    | -4.948547985 | -0.82   | 0.165705173 | 0.439880899 |
| WBGene00011437 |           | T04F3.2    | -2.826591352 | -0.82   | 0.290102069 | 0.50676114  |
| WBGene00012398 |           | Y6E2A.4    | -3.500743444 | -0.8225 | 0.234950094 | 0.463367002 |
| WBGene00013957 | sre-23    | ZK265.5    | -5.787852787 | -0.8225 | 0.142107968 | 0           |
| WBGene00014254 | cyp-13A10 | ZK1320.4   | -3.317806682 | -0.8225 | 0.247904739 | 0.489403914 |
| WBGene00015298 |           | C01F1.3    | -4.549354925 | -0.8225 | 0.180794863 | 0.439880899 |
| WBGene00011880 |           | T21B6.3    | -2.830596452 | -0.825  | 0.291458007 | 0.50676114  |
| WBGene00012763 |           | Y41E3.3    | -6.69133404  | -0.8275 | 0.123667417 | 0           |
| WBGene00001432 | fbk-7     | B0511.1    | -3.677857929 | -0.83   | 0.22567484  | 0.439880899 |
| WBGene00016628 |           | C44B7.6    | -3.559309051 | -0.83   | 0.233191327 | 0.439880899 |
| A_12_P165981   |           |            | -3.112003897 | -0.8325 | 0.267512518 | 0.50676114  |
| WBGene00003681 | nhr-91    | Y15E3A.1   | -2.944120003 | -0.8325 | 0.282767006 | 0.50676114  |
| WBGene00006956 | wrt-10    | ZK1290.8   | -3.54853997  | -0.8325 | 0.234603529 | 0.463367002 |
| WBGene00022758 |           | ZK488.6    | -6.077666366 | -0.8325 | 0.136976917 | 0           |
| WBGene00011055 | arrd-14   | R06B9.4    | -3.345327792 | -0.835  | 0.249601848 | 0.489403914 |
| WBGene00011307 | mpst-7    | R186.6     | -3.526534845 | -0.835  | 0.236776336 | 0.463367002 |
| WBGene00012070 |           | T26H5.8    | -4.560031552 | -0.835  | 0.183112768 | 0.439880899 |
| WBGene00001071 | dpy-9     | T21D12.2   | -2.801060993 | -0.8375 | 0.298993846 | 0.50676114  |
| WBGene00013104 |           | Y51H4A.8   | -4.241797645 | -0.8375 | 0.197439876 | 0.439880899 |
| WBGene00022156 |           | Y71G12B.18 | -6.206529316 | -0.8375 | 0.134938539 | 0           |
| WBGene00001059 | dpf-6     | F44B9.1    | -3.970801598 | -0.84   | 0.211544188 | 0.439880899 |
| WBGene00001519 | gar-3     | Y40H4A.1   | -7.829770657 | -0.84   | 0.107282836 | 0           |
| WBGene00004932 | sod-3     | C08A9.1    | -5.755968839 | -0.84   | 0.145935467 | 0.439880899 |
| WBGene00008712 |           | F11E6.9    | -3.351650528 | -0.84   | 0.250622788 | 0.463367002 |
| WBGene00010127 |           | F55G11.7   | -4.600829736 | -0.84   | 0.182575763 | 0.439880899 |
| WBGene00019449 |           | K06H6.1    | -3.328917105 | -0.84   | 0.25233431  | 0.489403914 |
| WBGene00010528 |           | K03D3.2    | -3.425039869 | -0.845  | 0.246712457 | 0.463367002 |
| WBGene00006097 | str-31    | C54F6.10   | -5.016039287 | -0.8475 | 0.168958007 | 0.439880899 |
| WBGene00006949 | wrt-3     | F38E11.7   | -4.489277028 | -0.85   | 0.189340064 | 0.439880899 |
| WBGene00019450 |           | K06H6.2    | -5.034168466 | -0.85   | 0.168846157 | 0.439880899 |
| WBGene00018743 |           | F53B3.5    | -2.943019521 | -0.8525 | 0.289668483 | 0.50676114  |
| WBGene00018861 | cutl-21   | F55A4.10   | -5.786499008 | -0.8525 | 0.147325697 | 0           |
| WBGene00015647 |           | C09F5.1    | -9.541595797 | -0.8625 | 0.090393684 | 0           |
| WBGene00002393 | lpr-1     | Y65B4BR.2  | -3.297614354 | -0.865  | 0.262310843 | 0.489403914 |
| WBGene00016919 |           | C54E4.4    | -2.737854642 | -0.865  | 0.315940805 | 0.593984595 |
| WBGene00019597 |           | K09H9.5    | -4.153424885 | -0.865  | 0.208261862 | 0.439880899 |
| WBGene00010505 |           | K02D3.2    | -4.859598743 | -0.8675 | 0.178512681 | 0.439880899 |
| WBGene00015795 |           | C15F1.2    | -4.14315293  | -0.87   | 0.209985008 | 0.439880899 |
| WBGene00019368 |           | K03H6.2    | -4.483053168 | -0.87   | 0.194064172 | 0.439880899 |
| WBGene00004017 | phg-1     | F27E5.4    | -2.969591659 | -0.8725 | 0.293811439 | 0.50676114  |

|                |          |             |              |         |             |             |
|----------------|----------|-------------|--------------|---------|-------------|-------------|
| WBGene00015268 |          | BE0003N10.3 | -4.443509661 | -0.8725 | 0.196353798 | 0.439880899 |
| WBGene00000905 | daf-9    | T13C5.1     | -4.90135687  | -0.8775 | 0.179032056 | 0.439880899 |
| WBGene00011508 |          | T05H10.3    | -5.492431889 | -0.8775 | 0.159765295 | 0.439880899 |
| WBGene00044303 | hst-3.2  | F52B10.2    | -4.71781671  | -0.8775 | 0.185997052 | 0.439880899 |
| WBGene00000702 | col-128  | F12F6.9     | -3.544748064 | -0.88   | 0.248254596 | 0.463367002 |
| WBGene00000753 | col-180  | C44C10.1    | -3.022174785 | -0.8825 | 0.29200826  | 0.50676114  |
| WBGene00011009 | cyp-14A4 | R04D3.1     | -4.98332331  | -0.8825 | 0.177090657 | 0.439880899 |
| WBGene00018639 | tbc-16   | F49E10.1    | -6.453845714 | -0.8825 | 0.136740176 | 0           |
| WBGene00020192 |          | T03F1.11    | -3.178348485 | -0.8825 | 0.277659924 | 0.489403914 |
| WBGene00001699 | grd-10   | F09D12.1    | -3.81279362  | -0.885  | 0.232113271 | 0.439880899 |
| WBGene00019751 |          | M03D4.4     | -3.411206388 | -0.885  | 0.259439008 | 0.463367002 |
| WBGene00020703 |          | T22F7.4     | -3.445695961 | -0.8875 | 0.257567705 | 0.463367002 |
| WBGene00006965 | xtr-1    | F54F7.4     | -2.916408897 | -0.89   | 0.305169827 | 0.50676114  |
| WBGene00009061 |          | F22G12.1    | -5.737249539 | -0.8925 | 0.155562346 | 0.439880899 |
| WBGene00013884 |          | ZC412.3     | -4.684655009 | -0.8975 | 0.191582944 | 0.439880899 |
| WBGene00020258 |          | T05E7.1     | -3.210569386 | -0.8975 | 0.27954543  | 0.489403914 |
| WBGene00006852 | unc-129  | C53D6.2     | -4.157850353 | -0.9    | 0.216458007 | 0.439880899 |
| WBGene00004224 | ptr-10   | F55F8.1     | -3.152895314 | -0.9025 | 0.286244835 | 0.489403914 |
| WBGene00008519 | cyp-13B1 | F02C12.5    | -2.939159729 | -0.9025 | 0.307060549 | 0.50676114  |
| WBGene00009586 |          | F40F9.10    | -5.151513194 | -0.9025 | 0.175191243 | 0.439880899 |
| WBGene00019113 |          | F59E11.7    | -3.297202294 | -0.9025 | 0.273716903 | 0.489403914 |
| WBGene00011452 | ugt-55   | T04H1.7     | -3.351476104 | -0.905  | 0.270030271 | 0.463367002 |
| WBGene00015760 |          | C14C6.6     | -5.581841358 | -0.9075 | 0.162580758 | 0.439880899 |
| WBGene00016422 | noah-1   | C34G6.6     | -4.210520758 | -0.9075 | 0.215531535 | 0.439880899 |
| WBGene00002116 | ins-33   | W09C5.4     | -4.235746786 | -0.91   | 0.214838149 | 0.439880899 |
| WBGene00008978 | cutl-3   | F20D1.8     | -4.580170424 | -0.91   | 0.198682563 | 0.439880899 |
| WBGene00015593 |          | C08E3.1     | -3.906564605 | -0.91   | 0.232941239 | 0.439880899 |
| WBGene00000016 | abf-5    | T22H6.5     | -3.862742232 | -0.9125 | 0.23623114  | 0.439880899 |
| WBGene00009803 |          | F47B8.2     | -4.128703403 | -0.915  | 0.221619213 | 0.439880899 |
| WBGene00011833 |          | T19B10.5    | -4.575725115 | -0.915  | 0.199968306 | 0.439880899 |
| WBGene00044512 |          | W03F9.11    | -3.714123571 | -0.9175 | 0.247030015 | 0.439880899 |
| WBGene00000742 | col-169  | T10E10.5    | -4.439518305 | -0.92   | 0.20722969  | 0.439880899 |
| WBGene00018041 |          | F35D2.3     | -3.54360141  | -0.92   | 0.259633229 | 0.463367002 |
| WBGene00008477 | clec-17  | E03H4.10    | -5.704341633 | -0.925  | 0.162157188 | 0.439880899 |
| WBGene00012255 | lpr-6    | W04G3.1     | -4.9673843   | -0.925  | 0.186214705 | 0.439880899 |
| WBGene00020873 |          | T28A11.6    | -2.829418179 | -0.925  | 0.326922336 | 0.50676114  |
| WBGene00010835 |          | M03B6.3     | -3.767100932 | -0.93   | 0.246874192 | 0.439880899 |
| WBGene00044315 |          | F41G3.20    | -3.23217501  | -0.93   | 0.288531568 | 0.489403914 |
| WBGene00016180 |          | C28C12.4    | -4.206775768 | -0.9325 | 0.2216662   | 0.439880899 |
| WBGene00011095 | gana-1   | R07B7.11    | -5.420769617 | -0.935  | 0.172484733 | 0.439880899 |
| WBGene00011676 | cyp-13A2 | T10B9.7     | -3.073202127 | -0.935  | 0.304242924 | 0.50676114  |
| WBGene00002827 | let-653  | C29E6.1     | -3.82090198  | -0.9375 | 0.245360913 | 0.439880899 |
| WBGene00005078 | src-2    | F49B2.5     | -8.527023881 | -0.94   | 0.110237759 | 0           |
| WBGene00021478 |          | Y39H10A.1   | -6.632082377 | -0.94   | 0.141735272 | 0           |
| WBGene00003651 | nhr-61   | W01D2.2     | -4.313609295 | -0.945  | 0.219074083 | 0.439880899 |
| WBGene00020156 |          | T02B11.4    | -5.273753848 | -0.945  | 0.179189251 | 0.439880899 |
| WBGene00044515 |          | K10C9.9     | -5.232989038 | -0.945  | 0.180585129 | 0.439880899 |
| WBGene00017133 |          | EEED8.2     | -5.439452853 | -0.9475 | 0.174190314 | 0.439880899 |
| WBGene00021529 |          | Y41G9A.5    | -3.223651236 | -0.9475 | 0.293921374 | 0.489403914 |
| WBGene00018303 |          | F41G3.10    | -2.742575939 | -0.9525 | 0.347301231 | 0.593984595 |
| WBGene00010166 | gmd-2    | F56H6.5     | -3.446263091 | -0.955  | 0.277111751 | 0.463367002 |
| WBGene00001762 | gst-14   | F37B1.3     | -4.371910032 | -0.9625 | 0.220155491 | 0.439880899 |
| WBGene00013007 |          | Y48E1B.8    | -3.292393233 | -0.9625 | 0.292340535 | 0.489403914 |
| WBGene00015762 |          | C14C6.8     | -4.575605547 | -0.9625 | 0.210354671 | 0.439880899 |
| WBGene00017331 | ugt-40   | F10D2.5     | -3.568814562 | -0.9625 | 0.269697398 | 0.439880899 |
| WBGene00010216 |          | F57G8.7     | -4.011757927 | -0.9675 | 0.241166097 | 0.439880899 |
| WBGene00010940 |          | M163.8      | -3.608280153 | -0.9675 | 0.268133282 | 0.439880899 |
| WBGene00019212 |          | H19M22.3    | -3.32324705  | -0.9725 | 0.292635481 | 0.489403914 |
| WBGene00018744 |          | F53B3.6     | -4.19501453  | -0.9825 | 0.234206579 | 0.439880899 |
| WBGene00020237 | phat-4   | T05B4.3     | -2.774481874 | -0.9875 | 0.355922311 | 0.593984595 |
| WBGene00008028 | scl-6    | C39E9.4     | -3.010192703 | -0.99   | 0.328882599 | 0.50676114  |
| WBGene00009722 |          | F45D3.2     | -6.048789268 | -0.99   | 0.163669117 | 0           |
| WBGene00010742 |          | K10D6.2     | -3.434743092 | -0.99   | 0.288231164 | 0.463367002 |
| WBGene00020975 |          |             | -4.035926198 | -0.99   | 0.245296854 | 0.439880899 |
| WBGene00019730 | asns-2   | M02D8.4     | -5.296631109 | -0.9925 | 0.187383259 | 0.439880899 |
| WBGene00011838 |          | T19C4.1     | -6.049352235 | -0.9975 | 0.164893688 | 0           |
| WBGene00017455 |          | F14D2.7     | -3.606946249 | -1.0025 | 0.277935941 | 0.439880899 |
| WBGene00000968 | dhs-4    | T05F1.10    | -3.509992587 | -1.005  | 0.286325391 | 0.463367002 |
| WBGene00013636 |          | Y105C5A.12  | -4.145906021 | -1.005  | 0.24240781  | 0.439880899 |
| WBGene00020618 |          | T20D4.12    | -4.894859662 | -1.01   | 0.206338909 | 0.439880899 |

|                |          |            |              |         |             |             |
|----------------|----------|------------|--------------|---------|-------------|-------------|
| WBGene00009257 |          | F29G6.1    | -6.853401943 | -1.0125 | 0.147736848 | 0           |
| WBGene00021127 |          | W10C8.4    | -2.958130368 | -1.025  | 0.346502646 | 0.50676114  |
| WBGene00003473 | mtl-1    | K11G9.6    | -5.387438297 | -1.0325 | 0.191649527 | 0.439880899 |
| WBGene00013753 |          | Y113G7A.16 | -3.515913651 | -1.0325 | 0.293664778 | 0.463367002 |
| WBGene00019495 | sdz-24   | K07E8.3    | -4.226597333 | -1.0325 | 0.244286342 | 0.439880899 |
| WBGene00002118 | ins-35   | K02E2.4    | -4.614731286 | -1.035  | 0.224281748 | 0.439880899 |
| WBGene00022757 |          | ZK488.5    | -6.381694406 | -1.0425 | 0.163357869 | 0           |
| WBGene00011362 |          | T02B5.1    | -5.41006239  | -1.0525 | 0.194544891 | 0.439880899 |
| WBGene00011522 | srap-1   | T06D8.1    | -3.425731378 | -1.0525 | 0.307233663 | 0.463367002 |
| WBGene00018451 |          | F45D11.4   | -3.566699783 | -1.0525 | 0.295090718 | 0.439880899 |
| WBGene00044536 |          | F14F9.8    | -3.968983581 | -1.055  | 0.265811127 | 0.439880899 |
| WBGene00012176 |          | W01C9.2    | -3.385036541 | -1.0575 | 0.312404309 | 0.463367002 |
| WBGene00002128 | inx-6    | C36H8.2    | -2.759133846 | -1.0625 | 0.385084617 | 0.593984595 |
| WBGene00006642 | tsp-16   | F01E11.4   | -3.147917746 | -1.065  | 0.338318878 | 0.489403914 |
| WBGene00013515 |          | Y73F4A.2   | -3.093718256 | -1.07   | 0.345862135 | 0.50676114  |
| WBGene00006583 | tnc-2    | ZK673.7    | -2.838932109 | -1.0775 | 0.379544124 | 0.50676114  |
| WBGene00011674 | cyp-13A8 | T10B9.4    | -4.92432049  | -1.08   | 0.2193196   | 0.439880899 |
| WBGene00019278 |          | K01A2.3    | -3.378824567 | -1.08   | 0.319637785 | 0.463367002 |
| WBGene00018448 |          | F45D11.1   | -3.718885079 | -1.085  | 0.291754108 | 0.439880899 |
| WBGene00008509 |          | F01G10.6   | -2.989192411 | -1.09   | 0.364646985 | 0.50676114  |
| WBGene00015761 |          | C14C6.7    | -6.540107402 | -1.1    | 0.168192957 | 0           |
| WBGene00008905 |          | F17B5.1    | -5.610906049 | -1.105  | 0.19693789  | 0.439880899 |
| WBGene00000739 | col-166  | T07H6.3    | -3.20006679  | -1.115  | 0.348430228 | 0.489403914 |
| WBGene00008963 |          | F19H8.2    | -3.132927857 | -1.115  | 0.35589712  | 0.50676114  |
| WBGene00000731 | col-158  | D2023.7    | -12.41790294 | -1.1225 | 0.090393684 | 0           |
| WBGene00009730 | myo-6    | F45G2.2    | -4.355865902 | -1.1225 | 0.257698475 | 0.439880899 |
| WBGene00013853 |          | ZC116.1    | -2.985714349 | -1.1225 | 0.37595693  | 0.50676114  |
| WBGene00015622 |          | C09B8.3    | -3.525241284 | -1.125  | 0.319127092 | 0.463367002 |
| WBGene00017184 | ncam-1   | F02G3.1    | -3.785335285 | -1.125  | 0.297199565 | 0.439880899 |
| WBGene00050897 |          | C47A10.13  | -5.269725667 | -1.1275 | 0.213958007 | 0.439880899 |
| WBGene00020561 |          | T19C3.3    | -3.657607541 | -1.13   | 0.30894512  | 0.439880899 |
| WBGene00015758 | nhr-155  | C14C6.4    | -5.737772743 | -1.1325 | 0.197376238 | 0.439880899 |
| WBGene00003031 | lin-46   | R186.4     | -3.27017878  | -1.1475 | 0.350898247 | 0.489403914 |
| WBGene00008591 |          | F08H9.3    | -4.325123778 | -1.16   | 0.268200417 | 0.439880899 |
| WBGene00001702 | grd-13   | W05E7.3    | -5.546125272 | -1.1775 | 0.212310386 | 0.439880899 |
| WBGene00003623 | nhr-25   | F11C1.6    | -8.811181895 | -1.1825 | 0.13420447  | 0           |
| WBGene00008490 |          | F01D4.8    | -7.722707128 | -1.1875 | 0.153767323 | 0           |
| WBGene00018215 | igcm-1   | F39H12.4   | -3.967380124 | -1.19   | 0.299946051 | 0.439880899 |
| WBGene00015879 |          | C17B7.5    | -4.018871855 | -1.1925 | 0.296725062 | 0.439880899 |
| WBGene00007938 |          | C34F6.1    | -3.138943497 | -1.2025 | 0.38309068  | 0.50676114  |
| WBGene00022816 | fbn-1    | ZK783.1    | -4.077890097 | -1.2075 | 0.29610901  | 0.439880899 |
| WBGene00045207 |          | F13E9.14   | -4.912937355 | -1.2075 | 0.245779645 | 0.439880899 |
| WBGene00007962 |          | C35D6.5    | -5.126765497 | -1.21   | 0.236016256 | 0.439880899 |
| WBGene00019311 |          | K02E7.6    | -4.124454183 | -1.215  | 0.294584434 | 0.439880899 |
| WBGene00015857 |          | C16D9.1    | -4.807587095 | -1.2175 | 0.253245542 | 0.439880899 |
| WBGene00009383 |          | F35B12.3   | -3.677742179 | -1.23   | 0.334444325 | 0.439880899 |
| WBGene00018460 |          | F45D11.15  | -5.369781243 | -1.255  | 0.233715294 | 0.439880899 |
| WBGene00008640 |          | F10B5.3    | -4.796362798 | -1.2575 | 0.262177832 | 0.439880899 |
| WBGene00001068 | dpy-6    | F16F9.2    | -3.290647116 | -1.2725 | 0.386702054 | 0.489403914 |
| WBGene00014847 |          | T27F6.9    | -6.364870551 | -1.285  | 0.201889416 | 0           |
| WBGene00000399 | cdh-7    | R05H10.6   | -3.678231367 | -1.295  | 0.352071382 | 0.439880899 |
| WBGene00018295 | oac-29   | F41E6.14   | -6.195578168 | -1.3525 | 0.218300853 | 0           |
| WBGene00021183 |          | Y9C9A.16   | -6.352789898 | -1.365  | 0.214866228 | 0           |
| WBGene00044201 |          | H39E23.3   | -6.773530614 | -1.365  | 0.201519721 | 0           |
| WBGene00001391 | far-7    | K01A2.2    | -5.268204239 | -1.38   | 0.261948842 | 0.439880899 |
| WBGene00011328 |          | T01D3.3    | -5.100327297 | -1.425  | 0.279393834 | 0.439880899 |
| WBGene00003514 | myo-2    | T18D3.4    | -2.709683632 | -1.455  | 0.536963055 | 0.593984595 |
| WBGene00008816 |          | F14F8.8    | -3.602933323 | -1.455  | 0.403837615 | 0.439880899 |
| WBGene00000665 | col-90   | C29E4.1    | -5.907731166 | -1.4775 | 0.250096011 | 0           |
| WBGene00020550 |          | T17H7.1    | -3.208811313 | -1.64   | 0.511092688 | 0.489403914 |
| WBGene00010738 |          | K10D3.4    | -3.506105385 | -1.655  | 0.472033729 | 0.463367002 |
| A_12_P177507   |          |            | -6.585785319 | -1.7675 | 0.268381053 | 0           |
| WBGene00000618 | col-41   | T10B10.1   | -7.477371338 | -1.7875 | 0.239054598 | 0           |
| A_12_P177508   |          |            | -7.629425982 | -1.825  | 0.239205414 | 0           |
| A_12_P177506   |          |            | -7.772460928 | -1.835  | 0.236089961 | 0           |
| WBGene00014074 |          | ZK757.2    | -17.14381915 | -1.8475 | 0.107764786 | 0           |
| A_12_P177504   |          |            | -8.119552013 | -1.9125 | 0.235542552 | 0           |
| A_12_P177505   |          |            | -8.641110929 | -1.9325 | 0.223640226 | 0           |
| A_12_P158985   |          |            | -6.451331239 | -2.1175 | 0.32822683  | 0           |
