# Supplementary material for: Transcription factors CEP‐1/p53 and CEH‐23 collaborate with AAK‐2/AMPK to modulate longevity in Caenorhabditis elegans
Source: PubMed Central journal article supplement (PMC5506430; doi:10.1111/acel.12619), 2017-05-30
Supplement: ACEL-16-814-s006.pdf [file ACEL-16-814-s006.pdf]

Table S3: Genes are common regulated by CEH-23 and CEP-1 in *isp-1* mutant (identified by 1 class SAM with FDR=0, 1.5 fold change cutoff)

| Gene ID        | ublic nam | seq name  | Score(d)    | Numerator(r) | denominator(s+s) | q-value(%) |
|----------------|-----------|-----------|-------------|--------------|------------------|------------|
| WBGene00011172 |           | R09E10.2  | 3.321242093 | 1.871428571  | 0.563472496      | 0          |
| WBGene00000989 | dhs-26    | ZK816.5   | 5.304029763 | 1.59         | 0.299772073      | 0          |
| WBGene00022821 |           | ZK813.2   | 3.406081031 | 1.558571429  | 0.457584953      | 0          |
| WBGene00007459 |           | C08F11.12 | 3.398065066 | 1.554285714  | 0.457403164      | 0          |
| WBGene00012878 |           | Y45F10C.2 | 3.36164662  | 1.528571429  | 0.454709136      | 0          |
| WBGene00007507 |           | C10C5.3   | 4.41292489  | 1.497142857  | 0.339263163      | 0          |
| WBGene00011461 |           |           | 5.461024856 | 1.484285714  | 0.271796184      | 0          |
| WBGene00008912 |           | F17C8.7   | 3.298662118 | 1.437142857  | 0.435674466      | 0          |
| WBGene00009622 |           | F41E7.6   | 5.085148178 | 1.415612245  | 0.27838171       | 0          |
| WBGene00019622 |           | K10C2.7   | 3.34718895  | 1.381428571  | 0.412713053      | 0          |
| WBGene00045105 |           | Y7A9C.11  | 4.643049991 | 1.332857143  | 0.287064999      | 0          |
| WBGene00003443 | misp-50   | C34F11.4  | 4.85740796  | 1.328571429  | 0.273514483      | 0          |
| A_12_P177535   |           |           | 3.948940188 | 1.317142857  | 0.33354338       | 0          |
| WBGene00000710 | col-137   | Y51H4A.9  | 3.790559862 | 1.314285714  | 0.346726015      | 0          |
| WBGene00003464 | misp-77   | F32B6.6   | 4.656220839 | 1.31         | 0.281344044      | 0          |
| WBGene00022875 |           | ZK1248.4  | 4.020292492 | 1.308571429  | 0.325491598      | 0          |
| WBGene00003452 | misp-59   | ZK354.11  | 4.346821779 | 1.304285714  | 0.300055024      | 0          |
| WBGene00003425 | misp-10   | K07F5.2   | 4.277254151 | 1.301428571  | 0.3042673        | 0          |
| WBGene00022002 |           | Y59E9AR.7 | 4.941275671 | 1.297142857  | 0.262511737      | 0          |
| WBGene00003426 | misp-19   | F36H12.7  | 4.795087603 | 1.292857143  | 0.269621173      | 0          |
| WBGene00003465 | misp-78   | T13F2.11  | 4.757131519 | 1.292857143  | 0.27177242       | 0          |
| A_12_P177537   |           |           | 4.204781436 | 1.288571429  | 0.306453843      | 0          |
| WBGene00011462 | scl-22    | T05A10.5  | 4.843898229 | 1.282857143  | 0.264839822      | 0          |
| WBGene00014675 |           | C12D8.3   | 4.233844782 | 1.281428571  | 0.302663096      | 0          |
| WBGene00003463 | misp-76   | ZK1251.6  | 4.055736624 | 1.281428571  | 0.315954582      | 0          |
| WBGene00003469 | misp-142  | K05F1.2   | 4.523841452 | 1.278571429  | 0.282629584      | 0          |
| A_12_P177538   |           |           | 3.883836955 | 1.277142857  | 0.328835343      | 0          |
| A_12_P177536   |           |           | 3.693445848 | 1.275714286  | 0.345399483      | 0          |
| WBGene00003456 | misp-63   | K05F1.7   | 4.169038    | 1.274285714  | 0.305654617      | 0          |
| WBGene00003448 | misp-55   | C09B9.6   | 4.353330203 | 1.272857143  | 0.292386997      | 0          |
| WBGene00011046 |           | R05H10.7  | 5.156551855 | 1.27122449   | 0.246526075      | 0          |
| WBGene00003457 | misp-64   | ZK1248.6  | 4.38852252  | 1.264285714  | 0.288089148      | 0          |
| A_12_P177534   |           |           | 4.152102811 | 1.264285714  | 0.304492873      | 0          |
| WBGene00022884 |           | ZK1248.17 | 3.84716863  | 1.261428571  | 0.327884918      | 0          |
| WBGene00013905 | ugt-4     | ZC455.5   | 4.018522564 | 1.26         | 0.313548071      | 0          |
| WBGene00021997 |           | Y59E9AR.1 | 4.794388701 | 1.251428571  | 0.261019423      | 0          |
| WBGene00006047 | ssp-19    | C55C2.2   | 3.660937805 | 1.25         | 0.341442566      | 0          |
| WBGene00008394 |           | D1086.7   | 3.214510547 | 1.247142857  | 0.387972862      | 0          |
| WBGene00003438 | misp-45   | F58A6.8   | 4.065258542 | 1.245714286  | 0.306429289      | 0          |
| WBGene00003466 | misp-79   | T13F2.10  | 3.955864203 | 1.237142857  | 0.312736432      | 0          |
| WBGene00003462 | misp-74   | F09C12.7  | 4.578860421 | 1.227142857  | 0.268001805      | 0          |
| WBGene00003434 | misp-38   | K08F4.8   | 4.836645296 | 1.225714286  | 0.253422406      | 0          |
| WBGene00020713 |           | T23B3.5   | 6.711055053 | 1.218571429  | 0.18157673       | 0          |
| WBGene00003444 | misp-51   | ZK354.5   | 4.405458624 | 1.214285714  | 0.275632078      | 0          |
| WBGene00022005 |           | Y59H11AM. | 4.699807195 | 1.21         | 0.25745737       | 0          |
| WBGene00016752 |           | C48E7.7   | 4.967216721 | 1.208571429  | 0.243309583      | 0          |
| WBGene00014674 |           | C12D8.2   | 4.467857551 | 1.204285714  | 0.26954434       | 0          |
| WBGene00006056 | sss-1     | F32B6.5   | 5.011332135 | 1.198571429  | 0.239172219      | 0          |
| WBGene00013070 |           | Y51A2B.6  | 5.108201983 | 1.197959184  | 0.2345168        | 0          |
| WBGene00022760 |           | ZK546.3   | 5.3229933   | 1.195714286  | 0.224631935      | 0          |
| WBGene00011173 | acs-18    | R09E10.3  | 3.992371178 | 1.194285714  | 0.299141954      | 0          |
| WBGene00013474 |           | Y69E1A.2  | 4.915924686 | 1.191428571  | 0.24236103       | 0          |
| WBGene00019026 |           | F58A6.9   | 5.305015463 | 1.18         | 0.22243102       | 0          |
| WBGene00043743 |           | Y59E9AL.2 | 4.642478495 | 1.18         | 0.254174575      | 0          |
| WBGene00021207 |           | Y18H1A.1  | 4.09633878  | 1.178571429  | 0.287713368      | 0          |
| WBGene00017112 |           | E03H12.5  | 5.304651454 | 1.177142857  | 0.221907672      | 0          |
| WBGene00003424 | misp-3    | F26G1.7   | 4.431718667 | 1.177142857  | 0.265617686      | 0          |
| WBGene00003431 | misp-33   | R05F9.8   | 4.243273492 | 1.174285714  | 0.27674052       | 0          |
| WBGene00020350 |           | T08B2.12  | 3.498220779 | 1.174285714  | 0.335680847      | 0          |
| WBGene00011748 |           | T13F2.9   | 5.076632133 | 1.172857143  | 0.231030556      | 0          |
| WBGene00003435 | misp-40   | C33F10.9  | 4.560762097 | 1.168571429  | 0.256222843      | 0          |
| A_12_P136645   |           |           | 4.939213555 | 1.165714286  | 0.236012125      | 0          |

|                |          |            |             |             |             |   |
|----------------|----------|------------|-------------|-------------|-------------|---|
| WBGene00010373 |          | H08M01.1   | 4.762282666 | 1.162857143 | 0.244180622 | 0 |
| WBGene00009681 | gipc-2   | F44D12.4   | 4.831027776 | 1.161428571 | 0.240410245 | 0 |
| WBGene00003449 | misp-56  | K07F5.3    | 4.347289619 | 1.161428571 | 0.267161536 | 0 |
| WBGene00009308 |          | F32A11.3   | 4.309115014 | 1.161428571 | 0.26952833  | 0 |
| WBGene00015026 |          | B0207.1    | 4.212930452 | 1.161428571 | 0.275681876 | 0 |
| WBGene00016825 |          | C50E10.1   | 4.64405559  | 1.157142857 | 0.249166453 | 0 |
| WBGene00009695 |          | F44F1.3    | 4.023480654 | 1.155714286 | 0.287242411 | 0 |
| WBGene00007308 |          | C04G2.9    | 3.716694111 | 1.154285714 | 0.310567854 | 0 |
| WBGene00014116 |          | ZK858.2    | 3.789647326 | 1.152857143 | 0.304212251 | 0 |
| WBGene00003437 | misp-42  | F26G1.8    | 3.602880845 | 1.152857143 | 0.319982034 | 0 |
| WBGene00020860 | nspd-10  | T27C10.7   | 5.548850699 | 1.151428571 | 0.207507578 | 0 |
| WBGene00008541 |          | F07A5.2    | 4.744096049 | 1.151428571 | 0.242707685 | 0 |
| WBGene00009449 |          | F35H8.4    | 5.145240621 | 1.15        | 0.223507526 | 0 |
| WBGene00013887 | nspa-5   | ZC412.6    | 4.456489721 | 1.15        | 0.258050634 | 0 |
| WBGene00009457 |          | F36A2.10   | 4.818913595 | 1.148571429 | 0.23834655  | 0 |
| WBGene00012637 |          | Y38H8A.3   | 4.809647931 | 1.148571429 | 0.238805718 | 0 |
| WBGene00003433 | misp-37  | K08F4.10   | 4.716708195 | 1.145714286 | 0.242905484 | 0 |
| WBGene00011336 | ubxn-5   | T01E8.9    | 4.348314475 | 1.145714286 | 0.263484689 | 0 |
| WBGene00016288 |          | C31H1.5    | 4.668848955 | 1.14        | 0.244171532 | 0 |
| WBGene00009682 | msd-2    | F44D12.5   | 4.331979507 | 1.134285714 | 0.261840046 | 0 |
| WBGene00010091 | ssp-35   | F55C5.1    | 4.770996327 | 1.131428571 | 0.237147232 | 0 |
| WBGene00003442 | misp-49  | C34F11.6   | 3.965526807 | 1.131428571 | 0.285316082 | 0 |
| WBGene00003429 | misp-31  | R05F9.13   | 4.654810502 | 1.125714286 | 0.241838907 | 0 |
| WBGene00007794 |          | C28D4.7    | 4.120477888 | 1.125714286 | 0.273199934 | 0 |
| WBGene00014665 |          | C04G2.3    | 3.713015993 | 1.125714286 | 0.303180565 | 0 |
| WBGene00016742 |          | C48B6.4    | 4.590779794 | 1.122571429 | 0.244527396 | 0 |
| WBGene00008754 |          | F13E9.5    | 4.578839148 | 1.118571429 | 0.244291488 | 0 |
| WBGene00012294 | nspa-8   | W06A7.5    | 4.481291659 | 1.117142857 | 0.24929037  | 0 |
| WBGene00013290 |          | Y57G11A.2  | 4.000047117 | 1.117142857 | 0.279282425 | 0 |
| WBGene00044474 |          | F56D6.12   | 3.602456806 | 1.117142857 | 0.31010583  | 0 |
| WBGene00016512 |          | C38C3.3    | 4.654119503 | 1.115714286 | 0.239726179 | 0 |
| WBGene00008623 |          | F09E8.1    | 6.281473573 | 1.113673469 | 0.177294938 | 0 |
| WBGene00009631 |          | F42E8.2    | 4.641227759 | 1.112857143 | 0.239776456 | 0 |
| WBGene00007159 |          | B0379.7    | 5.042577886 | 1.111428571 | 0.220408806 | 0 |
| WBGene00015987 |          | C18G1.9    | 4.261439295 | 1.107142857 | 0.259804911 | 0 |
| WBGene00011176 |          | R09E10.6   | 4.748136508 | 1.104285714 | 0.232572444 | 0 |
| WBGene00015908 |          | C17F3.3    | 4.599200423 | 1.104285714 | 0.240103847 | 0 |
| WBGene00008801 | acp-3    | F14E5.3    | 3.972177604 | 1.104285714 | 0.278005121 | 0 |
| A_12_P166055   |          |            | 4.525300298 | 1.102857143 | 0.243709162 | 0 |
| WBGene00015244 |          | B0524.5    | 4.090759315 | 1.101428571 | 0.269247953 | 0 |
| WBGene00009324 |          | F32B6.10   | 4.355589594 | 1.1         | 0.252549047 | 0 |
| WBGene00007601 |          | C15C6.2    | 4.338266652 | 1.1         | 0.253557489 | 0 |
| WBGene00012211 | ssp-37   | W02D9.5    | 4.888866719 | 1.097142857 | 0.224416602 | 0 |
| WBGene00010486 |          | K01H12.4   | 4.567959556 | 1.095714286 | 0.239869524 | 0 |
| WBGene00044177 |          | C30G7.3    | 3.998597462 | 1.095714286 | 0.274024654 | 0 |
| WBGene00006050 | ssq-1    | K07F5.11   | 3.508954325 | 1.095714286 | 0.312262339 | 0 |
| WBGene00014158 |          | ZK938.1    | 4.299564531 | 1.094285714 | 0.254510825 | 0 |
| WBGene00022706 |          | ZK354.3    | 4.461411148 | 1.09244898  | 0.244866241 | 0 |
| WBGene00009549 |          | F38H4.5    | 3.571929353 | 1.092380952 | 0.305823784 | 0 |
| WBGene00009884 |          | F49C12.15  | 3.984271015 | 1.09        | 0.273575767 | 0 |
| WBGene00016410 |          | C34E10.9   | 4.643232055 | 1.088571429 | 0.234442607 | 0 |
| WBGene00003470 | misp-152 | ZK546.6    | 4.117845055 | 1.088571429 | 0.264354635 | 0 |
| WBGene00012595 |          | Y38E10A.17 | 4.505907756 | 1.084285714 | 0.240636465 | 0 |
| WBGene00016399 |          | C34D4.3    | 4.230144013 | 1.084285714 | 0.256323593 | 0 |
| WBGene00015907 |          | C17F3.1    | 5.043215449 | 1.082857143 | 0.214715622 | 0 |
| WBGene00020840 |          | T27A3.4    | 4.162322358 | 1.082857143 | 0.260156963 | 0 |
| WBGene00012937 |          | Y47D3A.31  | 4.094755082 | 1.082857143 | 0.264449795 | 0 |
| WBGene00010633 | nspd-2   | K07F5.5    | 3.896630424 | 1.082857143 | 0.277895778 | 0 |
| WBGene00017851 |          | F27C1.1    | 3.818608315 | 1.08        | 0.282825551 | 0 |
| WBGene00016541 |          | C39H7.1    | 4.191366159 | 1.078571429 | 0.257331712 | 0 |
| WBGene00015937 |          | C17H12.12  | 4.671206934 | 1.077142857 | 0.23059198  | 0 |
| WBGene00007301 |          | C04F12.7   | 4.089703718 | 1.077142857 | 0.263379191 | 0 |
| WBGene00022689 | math-48  | ZK250.6    | 4.671533838 | 1.076938776 | 0.230532158 | 0 |
| WBGene00014239 |          | ZK1225.5   | 4.223394918 | 1.075714286 | 0.254703694 | 0 |
| WBGene00008590 |          | F08H9.2    | 3.49883874  | 1.075714286 | 0.307448947 | 0 |

|                |          |           |             |             |             |   |
|----------------|----------|-----------|-------------|-------------|-------------|---|
| WBGene00007248 | catp-4   | C01G12.8  | 3.999058776 | 1.074285714 | 0.26863464  | 0 |
| WBGene00007320 |          | C05B5.2   | 4.670209927 | 1.071428571 | 0.229417647 | 0 |
| WBGene00013858 | ssp-34   | ZC168.6   | 4.651491437 | 1.071428571 | 0.230340867 | 0 |
| WBGene00008433 | 2-Mar    | D2089.2   | 4.581673414 | 1.071428571 | 0.233850926 | 0 |
| WBGene00021996 |          | Y59E9AL.6 | 4.835681686 | 1.068571429 | 0.220976379 | 0 |
| WBGene00007792 |          | C28D4.4   | 4.237603525 | 1.068571429 | 0.252164088 | 0 |
| WBGene00009446 |          | F35H8.1   | 4.558058693 | 1.068061224 | 0.23432371  | 0 |
| WBGene00019430 |          | K06A5.2   | 4.481652299 | 1.067142857 | 0.23811371  | 0 |
| WBGene00022780 |          | ZK622.1   | 4.379443466 | 1.067142857 | 0.243670883 | 0 |
| WBGene00004966 | spe-12   | T02E1.1   | 3.926284258 | 1.067142857 | 0.271794599 | 0 |
| WBGene00022622 |          | ZC477.10  | 3.764469753 | 1.065714286 | 0.283098114 | 0 |
| WBGene00013800 |          | Y116A8C.2 | 4.622451664 | 1.062040816 | 0.229757041 | 0 |
| WBGene00008383 |          | D1081.5   | 3.98807833  | 1.061428571 | 0.266150382 | 0 |
| WBGene00009005 |          | F21C3.6   | 3.80351813  | 1.061428571 | 0.279064943 | 0 |
| WBGene00006040 | ssp-11   | T28H11.6  | 4.542609575 | 1.06        | 0.23334605  | 0 |
| WBGene00020905 |          | T28H11.7  | 4.4631573   | 1.057142857 | 0.23685987  | 0 |
| WBGene00009959 |          | F53B6.4   | 4.646573394 | 1.051428571 | 0.226280418 | 0 |
| WBGene00007977 | gska-3   | C36B1.10  | 4.100892783 | 1.051428571 | 0.256390164 | 0 |
| WBGene00007795 |          | C28D4.8   | 4.673384038 | 1.05        | 0.224676592 | 0 |
| WBGene00016440 | gipc-1   | C35D10.2  | 4.830959914 | 1.047142857 | 0.216756685 | 0 |
| WBGene00012357 |          | W09D6.4   | 4.024790208 | 1.045714286 | 0.259818334 | 0 |
| WBGene00003432 | msp-36   | C04G2.4   | 3.504484031 | 1.045714286 | 0.298393223 | 0 |
| WBGene00020986 |          | W03D8.3   | 4.477637057 | 1.044285714 | 0.233222501 | 0 |
| WBGene00009548 |          | F38H4.4   | 4.016207147 | 1.044285714 | 0.260017892 | 0 |
| WBGene00016351 |          | C33F10.1  | 3.96440553  | 1.044285714 | 0.263415462 | 0 |
| WBGene00011460 | ttr-14   | T05A10.3  | 4.430707704 | 1.042857143 | 0.235370332 | 0 |
| WBGene00019920 | acs-15   | R07C3.4   | 3.673515263 | 1.042857143 | 0.283885344 | 0 |
| WBGene00010137 | ztf-26   | F55H12.6  | 4.668963319 | 1.04        | 0.22274752  | 0 |
| WBGene00007793 |          | C28D4.5   | 4.453807415 | 1.04        | 0.233508076 | 0 |
| WBGene00012925 | wht-8    | Y47D3A.11 | 4.49226914  | 1.038571429 | 0.231190829 | 0 |
| WBGene00011295 |          | R102.8    | 4.149511224 | 1.038571429 | 0.250287654 | 0 |
| WBGene00017902 |          | F28E10.4  | 3.918674781 | 1.038571429 | 0.265031289 | 0 |
| WBGene00013723 |          | Y106G6H.1 | 4.742025066 | 1.037142857 | 0.218713069 | 0 |
| WBGene00014104 |          | ZK849.6   | 4.279265293 | 1.037142857 | 0.242364702 | 0 |
| WBGene00009609 | oac-27   | F41D3.4   | 4.407282416 | 1.036428571 | 0.235162732 | 0 |
| WBGene00013696 |          | Y106G6A.4 | 4.739600211 | 1.035714286 | 0.218523555 | 0 |
| WBGene00015094 |          | B0261.6   | 4.669971798 | 1.034285714 | 0.221475794 | 0 |
| WBGene00012185 |          | W01F3.2   | 4.117334655 | 1.034285714 | 0.251202732 | 0 |
| WBGene00016680 |          | C45G9.9   | 4.02197946  | 1.034285714 | 0.257158378 | 0 |
| WBGene00007307 |          | C04G2.8   | 3.633376926 | 1.034285714 | 0.284662378 | 0 |
| WBGene00044393 |          | ZK1248.20 | 4.009038379 | 1.032857143 | 0.257632141 | 0 |
| WBGene00004965 | spe-11   | F48C1.7   | 4.685820182 | 1.031428571 | 0.220116977 | 0 |
| WBGene00022763 |          | ZK546.7   | 4.314380776 | 1.031428571 | 0.23906758  | 0 |
| WBGene00012781 | nspd-7   | Y43C5A.1  | 4.333985334 | 1.03        | 0.237656549 | 0 |
| WBGene00011968 |          | T23G11.1  | 3.939453135 | 1.03        | 0.26145761  | 0 |
| WBGene00014247 |          | ZK1307.4  | 4.652831967 | 1.028571429 | 0.221063523 | 0 |
| WBGene00010933 |          | M162.7    | 4.050675535 | 1.028571429 | 0.253925899 | 0 |
| WBGene00013194 |          | Y54E2A.9  | 4.518159172 | 1.027142857 | 0.227336581 | 0 |
| WBGene00022652 |          | ZK84.5    | 3.457394333 | 1.027142857 | 0.297085828 | 0 |
| WBGene00006052 | ssq-3    | ZC477.1   | 3.996425517 | 1.025714286 | 0.256657926 | 0 |
| WBGene00045355 |          | D1086.17  | 4.809506739 | 1.024285714 | 0.212971053 | 0 |
| WBGene00022008 |          | Y59H11AM. | 4.146432698 | 1.022857143 | 0.246683648 | 0 |
| WBGene00009948 |          | F52H3.6   | 4.451730643 | 1.021428571 | 0.229445277 | 0 |
| WBGene00018526 |          | F47B3.2   | 4.235445787 | 1.021428571 | 0.241161999 | 0 |
| WBGene00022754 | nspd-1   | ZK484.8   | 4.182803691 | 1.018571429 | 0.243514041 | 0 |
| WBGene00016058 | nspd-3   | C24D10.7  | 4.413584307 | 1.014285714 | 0.229809978 | 0 |
| WBGene00014246 |          | ZK1307.3  | 4.306840764 | 1.014285714 | 0.235505738 | 0 |
| WBGene00016675 |          | C45G9.4   | 4.110501944 | 1.012857143 | 0.246407168 | 0 |
| WBGene00022229 |          | Y73B6A.2  | 3.952181819 | 1.01244898  | 0.256174697 | 0 |
| WBGene00004904 | snf-5    | Y46G5A.30 | 4.728990884 | 1.011428571 | 0.213878309 | 0 |
| WBGene00022674 |          | ZK177.9   | 4.253616942 | 1.011428571 | 0.237780831 | 0 |
| WBGene00008660 | clec-153 | F10F2.8   | 3.902091561 | 1.011428571 | 0.25920165  | 0 |
| WBGene00012809 |          | Y43F8A.2  | 4.144656059 | 1.01        | 0.243687289 | 0 |
| WBGene00023306 |          | F59A7.10  | 4.090299475 | 1.01        | 0.246925685 | 0 |
| WBGene00013303 |          | Y57G11C.5 | 4.589600716 | 1.008571429 | 0.219751454 | 0 |

|                |          |           |             |             |             |   |
|----------------|----------|-----------|-------------|-------------|-------------|---|
| WBGene00010381 |          | H12D21.5  | 4.0716297   | 1.008571429 | 0.247707062 | 0 |
| WBGene00007987 |          | C36H8.1   | 3.717053379 | 1.008571429 | 0.271336278 | 0 |
| WBGene00019950 | clec-175 | R08C7.6   | 3.41586918  | 1.008571429 | 0.295260555 | 0 |
| WBGene00022621 |          | ZC477.7   | 4.162998703 | 1.007142857 | 0.241927257 | 0 |
| WBGene00007060 | wht-6    | T26A5.1   | 4.06703463  | 1.007142857 | 0.247635673 | 0 |
| WBGene00011429 |          | T04C12.7  | 3.997427311 | 1.007142857 | 0.25194776  | 0 |
| WBGene00017059 |          | D2062.7   | 4.005161038 | 1.005714286 | 0.251104581 | 0 |
| WBGene00010544 |          | K03H1.9   | 4.747407357 | 1.004285714 | 0.211544036 | 0 |
| WBGene00077519 |          | T27C10.8  | 4.87313972  | 1.002857143 | 0.205792815 | 0 |
| WBGene00013523 |          | Y73F8A.14 | 4.73175019  | 1.002857143 | 0.211942115 | 0 |
| WBGene00018134 |          | F37A4.4   | 3.517693079 | 1.002857143 | 0.285089438 | 0 |
| WBGene00019406 | acdh-8   | K05F1.3   | 4.509086337 | 1.001428571 | 0.222091239 | 0 |
| WBGene00020414 |          | T10E9.4   | 3.534948579 | 1.001428571 | 0.283293674 | 0 |
| WBGene00020353 |          | T08B6.4   | 4.331182398 | 1           | 0.230883835 | 0 |
| WBGene00015034 |          | B0207.11  | 4.140915976 | 1           | 0.241492463 | 0 |
| WBGene00015516 |          | C06A8.6   | 4.550161829 | 0.998571429 | 0.219458443 | 0 |
| WBGene00012223 |          | W03C9.8   | 4.472191302 | 0.998571429 | 0.223284596 | 0 |
| WBGene00011795 |          | T16A9.5   | 4.352897809 | 0.998571429 | 0.22940383  | 0 |
| WBGene00008950 | wht-5    | F19B6.4   | 3.570327961 | 0.998571429 | 0.279686191 | 0 |
| WBGene00012679 |          | Y39B6A.18 | 3.654258312 | 0.997809524 | 0.273053911 | 0 |
| WBGene00014106 |          | ZK856.5   | 4.626808934 | 0.997142857 | 0.215514164 | 0 |
| WBGene00013526 |          | Y73F8A.20 | 3.643365545 | 0.995952381 | 0.273360542 | 0 |
| WBGene00013888 | nsps-3   | ZC412.7   | 3.863952644 | 0.995714286 | 0.257693191 | 0 |
| WBGene00007230 |          | C01G10.1  | 3.962749021 | 0.995238095 | 0.251148405 | 0 |
| WBGene00044062 | snb-6    | T14D7.3   | 4.458887793 | 0.994285714 | 0.222989624 | 0 |
| WBGene00009143 |          | F26A3.5   | 3.543720597 | 0.994285714 | 0.28057678  | 0 |
| WBGene00017058 |          | D2062.6   | 4.62861809  | 0.992857143 | 0.21450401  | 0 |
| WBGene00018122 | ttbk-2   | F36H12.8  | 3.774985511 | 0.992857143 | 0.263009524 | 0 |
| WBGene00019248 |          | H27M09.5  | 3.533420588 | 0.992857143 | 0.280990366 | 0 |
| WBGene00006051 | ssq-2    | T28H11.5  | 4.083140947 | 0.991428571 | 0.242810274 | 0 |
| WBGene00013713 |          | Y106G6G.4 | 4.000406977 | 0.991428571 | 0.247831927 | 0 |
| WBGene00004909 | snf-10   | Y32F6A.2  | 3.834532008 | 0.991428571 | 0.258552692 | 0 |
| WBGene00012926 |          | Y47D3A.13 | 6.121709503 | 0.99        | 0.161719533 | 0 |
| WBGene00017325 |          | F10C1.3   | 4.909326593 | 0.99        | 0.201656985 | 0 |
| WBGene00021113 | gsp-3    | W09C3.6   | 4.916959125 | 0.988571429 | 0.201053416 | 0 |
| WBGene00009491 |          | F36G9.15  | 3.338766177 | 0.988571429 | 0.296088847 | 0 |
| WBGene00010611 |          | K07A1.4   | 4.759216348 | 0.987142857 | 0.207417101 | 0 |
| WBGene00013956 |          | ZK265.3   | 4.23388503  | 0.987142857 | 0.233152967 | 0 |
| WBGene00014238 |          | ZK1225.4  | 3.902753332 | 0.987142857 | 0.252934985 | 0 |
| WBGene00018087 |          | F36D4.1   | 4.042608756 | 0.986734694 | 0.244083648 | 0 |
| WBGene00011491 |          | T05F1.5   | 4.586873796 | 0.985714286 | 0.214898933 | 0 |
| WBGene00021969 |          | Y57G7A.6  | 3.961740186 | 0.985714286 | 0.248808412 | 0 |
| WBGene00014169 |          | ZK945.7   | 4.167760156 | 0.982857143 | 0.235823825 | 0 |
| WBGene00016274 |          | C30G12.2  | 8.235350612 | 0.981428571 | 0.119172652 | 0 |
| WBGene00014755 |          | F40F12.8  | 3.805612521 | 0.981428571 | 0.257889779 | 0 |
| WBGene00010650 |          | K08C9.1   | 3.929346102 | 0.98        | 0.249405365 | 0 |
| WBGene00019501 |          | K07E12.2  | 3.459748501 | 0.98        | 0.283257584 | 0 |
| WBGene00044684 |          | T08G11.2  | 4.399315703 | 0.978571429 | 0.222437191 | 0 |
| WBGene00013473 |          | Y69E1A.1  | 4.876991207 | 0.975714286 | 0.200064803 | 0 |
| WBGene00011378 |          | T02E1.6   | 4.205388146 | 0.975714286 | 0.232015275 | 0 |
| WBGene00011214 |          | R10E9.2   | 5.124864534 | 0.974285714 | 0.190109555 | 0 |
| WBGene00018119 |          | F36H12.3  | 4.087363626 | 0.974285714 | 0.238365314 | 0 |
| WBGene00011669 |          | T09F5.10  | 3.924426802 | 0.972857143 | 0.247897895 | 0 |
| WBGene00017386 | nsps-5   | F11G11.8  | 3.788922043 | 0.972857143 | 0.256763568 | 0 |
| WBGene00011467 | decr-1.3 | T05C12.3  | 3.785934628 | 0.972857143 | 0.256966176 | 0 |
| WBGene00004908 | snf-9    | C49C3.1   | 3.305081126 | 0.972857143 | 0.294351971 | 0 |
| WBGene00014127 |          | ZK892.3   | 3.936207149 | 0.971428571 | 0.246793051 | 0 |
| WBGene00002212 | kin-31   | B0523.1   | 4.629427969 | 0.97        | 0.209529127 | 0 |
| WBGene00016707 |          | C46E10.1  | 4.337400796 | 0.97        | 0.223636239 | 0 |
| WBGene00002204 | kin-21   | W08D2.8   | 3.600591195 | 0.97        | 0.269400203 | 0 |
| WBGene00007998 |          | C38C6.5   | 4.160203739 | 0.969183673 | 0.232965435 | 0 |
| WBGene00010136 |          | F55H12.5  | 4.752428698 | 0.968571429 | 0.203805568 | 0 |
| WBGene00015106 |          | B0280.11  | 4.389210163 | 0.968571429 | 0.220671007 | 0 |
| WBGene00021016 |          | W03G9.5   | 4.209975798 | 0.968571429 | 0.230065795 | 0 |
| WBGene00021288 | clec-123 | Y25C1A.1  | 3.573295983 | 0.968571429 | 0.27105827  | 0 |

|                |          |            |             |             |              |   |
|----------------|----------|------------|-------------|-------------|--------------|---|
| WBGene00021678 |          | Y48G1C.5   | 3.437479493 | 0.967959184 | 0.281589806  | 0 |
| WBGene00016414 |          | C34F11.2   | 4.403633119 | 0.967142857 | 0.219623849  | 0 |
| WBGene00018081 |          | F36A4.2    | 3.45606959  | 0.967142857 | 0.279838942  | 0 |
| WBGene00015629 |          | C09B9.4    | 4.03499546  | 0.965714286 | 0.239334665  | 0 |
| WBGene00019586 |          | K09F6.3    | 3.881163335 | 0.965714286 | 0.248820831  | 0 |
| WBGene00009685 |          | F44D12.8   | 3.631652111 | 0.965714286 | 0.265915968  | 0 |
| WBGene00044256 |          | Y45F10C.6  | 3.294423525 | 0.965714286 | 0.293136046  | 0 |
| WBGene00012547 |          | Y37D8A.5   | 4.340314408 | 0.964285714 | 0.222169554  | 0 |
| WBGene00008659 | clec-151 | F10F2.7    | 4.889743609 | 0.962857143 | 0.196913626  | 0 |
| WBGene00019260 |          | H34I24.1   | 4.32886993  | 0.962857143 | 0.222426906  | 0 |
| WBGene00003430 | msp-32   | R05F9.3    | 4.109056899 | 0.962857143 | 0.23432558   | 0 |
| WBGene00007448 |          | C08F8.6    | 3.686478639 | 0.962857143 | 0.261186145  | 0 |
| WBGene00009031 |          | F21H7.5    | 4.234647429 | 0.961428571 | 0.227038635  | 0 |
| WBGene00044447 |          | ZK688.10   | 3.556450333 | 0.961428571 | 0.270333755  | 0 |
| WBGene00018840 |          | F54H5.3    | 3.547963989 | 0.961428571 | 0.270980363  | 0 |
| WBGene00022771 |          | ZK616.1    | 3.540845803 | 0.961428571 | 0.271525117  | 0 |
| WBGene00011954 |          | T23F11.2   | 4.484533312 | 0.96        | 0.214069098  | 0 |
| WBGene00013165 |          | Y53F4B.19  | 3.988959562 | 0.96        | 0.24066426   | 0 |
| A_12_P111814   |          |            | 5.043358799 | 0.958571429 | 0.190066078  | 0 |
| WBGene00015689 |          | C10G11.9   | 4.374481655 | 0.957142857 | 0.218801434  | 0 |
| WBGene00007610 |          | C15H7.3    | 3.917773815 | 0.957142857 | 0.24430784   | 0 |
| WBGene00018563 |          | F47D12.7   | 3.519413796 | 0.957142857 | 0.271960875  | 0 |
| WBGene00001603 | gln-2    | K03H1.1    | 4.680251846 | 0.955714286 | 0.204201465  | 0 |
| WBGene00019561 |          | K09C6.7    | 4.236937287 | 0.955714286 | 0.225567248  | 0 |
| WBGene00013879 |          | ZC376.8    | 4.149024275 | 0.955714286 | 0.230346757  | 0 |
| WBGene00022090 |          | Y69A2AR.15 | 3.494561376 | 0.955714286 | 0.273486193  | 0 |
| WBGene00009864 |          | F49B2.4    | 4.351441542 | 0.954285714 | 0.219303352  | 0 |
| WBGene00008725 |          | F13A7.7    | 3.377535285 | 0.954285714 | 0.282539081  | 0 |
| WBGene00007763 |          | C27B7.6    | 4.194971379 | 0.953265306 | 0.227240002  | 0 |
| WBGene00013087 |          | Y51B9A.5   | 4.661881821 | 0.952857143 | 0.204393243  | 0 |
| WBGene00022467 |          | Y119C1B.1  | 3.833155432 | 0.952857143 | 0.248582965  | 0 |
| WBGene00013452 |          | Y67A10A.3  | 3.883012839 | 0.951904762 | 0.245145922  | 0 |
| WBGene00013988 |          | ZK512.10   | 4.003725285 | 0.951428571 | 0.237635828  | 0 |
| WBGene00044333 |          | C01G12.13  | 3.532768663 | 0.951428571 | 0.269315277  | 0 |
| WBGene00022162 |          | Y71G12B.27 | 4.293863679 | 0.95        | 0.221245962  | 0 |
| A_12_P181510   |          |            | 4.146954822 | 0.949591837 | 0.228985334  | 0 |
| WBGene00011619 |          | T08G3.7    | 3.868875639 | 0.949047619 | 0.245303211  | 0 |
| WBGene00050915 |          | Y6E2A.10   | 4.145416671 | 0.947142857 | 0.228479531  | 0 |
| WBGene00014197 |          | ZK1053.2   | 3.556502321 | 0.947142857 | 0.2666313015 | 0 |
| WBGene00017026 |          | D1037.5    | 3.81415847  | 0.944857143 | 0.24772362   | 0 |
| WBGene00011617 |          | T08G3.4    | 3.105825956 | 0.944761905 | 0.304190228  | 0 |
| WBGene00013170 |          | Y53F4B.24  | 4.954073239 | 0.944571429 | 0.190665617  | 0 |
| WBGene00009714 |          | F44G4.5    | 4.276779506 | 0.944285714 | 0.22079364   | 0 |
| WBGene00010679 |          | K08F4.5    | 3.824391676 | 0.944285714 | 0.246911351  | 0 |
| WBGene00017209 |          | F07E5.4    | 4.244177879 | 0.942857143 | 0.222153069  | 0 |
| WBGene00009344 |          | F32H2.7    | 3.56535403  | 0.942857143 | 0.264449795  | 0 |
| WBGene00020071 |          | R13H9.5    | 3.815035869 | 0.941428571 | 0.246767948  | 0 |
| WBGene00008581 | acl-13   | F08G5.2    | 3.467471393 | 0.941428571 | 0.271502909  | 0 |
| WBGene00009217 | oig-7    | F28D1.8    | 3.559122541 | 0.940714286 | 0.264310732  | 0 |
| A_12_P159210   |          |            | 3.824348157 | 0.94        | 0.245793521  | 0 |
| A_12_P159213   |          |            | 3.79833681  | 0.94        | 0.247476737  | 0 |
| WBGene00018001 |          | F33D11.2   | 4.430453798 | 0.938571429 | 0.211845439  | 0 |
| WBGene00010510 | ent-3    | K02E11.1   | 4.222771738 | 0.938571429 | 0.222264306  | 0 |
| WBGene00019410 |          | K05F1.9    | 3.998631836 | 0.937142857 | 0.234365877  | 0 |
| WBGene00044674 |          | B0280.17   | 4.227671407 | 0.935714286 | 0.221330893  | 0 |
| WBGene00009755 |          | F46A9.2    | 3.483514651 | 0.935714286 | 0.268612129  | 0 |
| WBGene00018235 |          | F40E12.2   | 3.629253778 | 0.934285714 | 0.257431905  | 0 |
| WBGene00010895 |          | M28.4      | 3.228656733 | 0.933571429 | 0.289151652  | 0 |
| WBGene00014007 |          | ZK596.2    | 4.201620136 | 0.932857143 | 0.222023199  | 0 |
| WBGene00009377 |          | F34D10.8   | 3.925948002 | 0.932857143 | 0.237613219  | 0 |
| WBGene00018497 |          | F46F5.6    | 3.716130904 | 0.931428571 | 0.250644715  | 0 |
| WBGene00010366 |          | H05L14.1   | 3.431622025 | 0.931428571 | 0.271425164  | 0 |
| WBGene00015247 |          | B0545.4    | 4.192417859 | 0.93122449  | 0.222121106  | 0 |
| WBGene00012171 |          | W01B6.4    | 4.786091774 | 0.930544218 | 0.194426739  | 0 |
| WBGene00015193 | clec-117 | B0432.12   | 4.621240578 | 0.93        | 0.201244662  | 0 |

|                |        |            |             |             |             |   |
|----------------|--------|------------|-------------|-------------|-------------|---|
| WBGene00013437 |        | Y66D12A.11 | 4.329092302 | 0.93        | 0.214825634 | 0 |
| WBGene00010869 |        | M05B5.1    | 4.048973597 | 0.93        | 0.22968784  | 0 |
| WBGene00020416 |        | T10E9.6    | 4.566725436 | 0.928571429 | 0.203334192 | 0 |
| WBGene00011466 |        | T05C12.1   | 4.428924267 | 0.928571429 | 0.209660715 | 0 |
| WBGene00015688 |        | C10G11.8   | 4.091947597 | 0.928571429 | 0.22692652  | 0 |
| WBGene00010906 |        | M88.3      | 3.868512317 | 0.928571429 | 0.24003321  | 0 |
| WBGene00021110 |        | W09C3.2    | 3.763891171 | 0.928571429 | 0.246705175 | 0 |
| WBGene00006048 | ssp-31 | ZK1225.6   | 3.711479273 | 0.928571429 | 0.250189038 | 0 |
| A_12_P171290   |        |            | 4.081877452 | 0.928571429 | 0.227486356 | 0 |
| WBGene00009215 | thn-2  | F28D1.5    | 4.622458291 | 0.925714286 | 0.200264497 | 0 |
| WBGene00016416 |        | C34F11.5   | 4.606431908 | 0.925714286 | 0.200961244 | 0 |
| WBGene00022589 |        | ZC317.6    | 4.235364534 | 0.925714286 | 0.218567795 | 0 |
| WBGene00018347 |        | F42C5.5    | 4.061239125 | 0.925714286 | 0.227938877 | 0 |
| WBGene00014777 |        | F58A4.12   | 3.942389633 | 0.925714286 | 0.23481045  | 0 |
| WBGene00017869 |        | F28A10.1   | 3.170598401 | 0.924761905 | 0.29166794  | 0 |
| WBGene00009185 |        | F27C8.5    | 4.256108101 | 0.922857143 | 0.216831227 | 0 |
| WBGene00010046 |        | F54D1.1    | 3.929805395 | 0.922857143 | 0.234835329 | 0 |
| WBGene00021386 |        | Y37F4.5    | 3.368917771 | 0.921904762 | 0.273650123 | 0 |
| WBGene00005012 |        | F26F4.2    | 4.510716519 | 0.921428571 | 0.204275433 | 0 |
| WBGene00012711 |        | Y39E4A.1   | 4.001476562 | 0.921428571 | 0.23027214  | 0 |
| WBGene00014179 |        | ZK1010.5   | 3.609538211 | 0.921428571 | 0.255276026 | 0 |
| WBGene00015032 |        | B0207.9    | 3.978556204 | 0.92        | 0.231239664 | 0 |
| A_12_P159214   |        |            | 3.7557316   | 0.92        | 0.244958932 | 0 |
| WBGene00008772 | irld-4 | F13G11.2   | 4.740416633 | 0.918571429 | 0.193774408 | 0 |
| WBGene00013809 |        | Y116A8C.33 | 4.154418916 | 0.918571429 | 0.221107078 | 0 |
| WBGene00008529 |        | F02E9.3    | 3.943274543 | 0.917142857 | 0.232584074 | 0 |
| WBGene00007306 |        | C04G2.5    | 3.912622602 | 0.917142857 | 0.234406164 | 0 |
| WBGene00010072 |        | F54F12.1   | 3.320345267 | 0.916       | 0.275874925 | 0 |
| WBGene00016161 |        | C27D6.3    | 4.904714017 | 0.915714286 | 0.186700852 | 0 |
| WBGene00013521 |        | Y73F8A.12  | 4.583580714 | 0.915714286 | 0.199781425 | 0 |
| WBGene00010563 |        | K04G2.4    | 3.658813749 | 0.914285714 | 0.249885831 | 0 |
| WBGene00010634 |        | K07F5.6    | 4.016184559 | 0.912857143 | 0.22729462  | 0 |
| WBGene00013279 |        | Y57A10B.7  | 3.5249631   | 0.912857143 | 0.258969276 | 0 |
| WBGene00020674 |        | T22B7.7    | 3.337739493 | 0.912857143 | 0.273495623 | 0 |
| WBGene00014681 |        | C25D7.14   | 4.683404523 | 0.912380952 | 0.194811477 | 0 |
| WBGene00015467 | basl-1 | C05D2.3    | 4.592349656 | 0.911428571 | 0.19846672  | 0 |
| WBGene00020987 |        | W03D8.5    | 4.318046962 | 0.911428571 | 0.211074261 | 0 |
| WBGene00017672 |        | F21F3.2    | 4.308906473 | 0.911428571 | 0.211522013 | 0 |
| WBGene00018125 | rmd-4  | F36H12.11  | 4.308574685 | 0.91        | 0.211206737 | 0 |
| WBGene00010574 |        | K04H4.5    | 4.136479556 | 0.91        | 0.219993835 | 0 |
| WBGene00020971 |        | W03B1.1    | 3.813230493 | 0.91        | 0.2386428   | 0 |
| WBGene00009269 |        | F30A10.12  | 3.734294073 | 0.91        | 0.243687289 | 0 |
| WBGene00018178 |        | F38E1.3    | 3.5161273   | 0.91        | 0.258807467 | 0 |
| WBGene00015306 |        | C01G5.4    | 3.24626134  | 0.91        | 0.280322471 | 0 |
| WBGene00044777 |        | T02B11.9   | 4.39410626  | 0.909142857 | 0.206900517 | 0 |
| WBGene00019255 |        | H32C10.1   | 4.56557982  | 0.908571429 | 0.199004609 | 0 |
| WBGene00009402 |        | F35C11.3   | 4.370506412 | 0.908571429 | 0.207886991 | 0 |
| WBGene00013827 |        | Y116F11B.1 | 3.680098669 | 0.907346939 | 0.246555057 | 0 |
| WBGene00016843 |        | C50F7.3    | 4.929444825 | 0.907142857 | 0.18402536  | 0 |
| WBGene00006553 | tbx-34 | Y47D3A.10  | 4.054592343 | 0.907142857 | 0.223732198 | 0 |
| A_12_P159211   |        |            | 3.711761798 | 0.907142857 | 0.244396841 | 0 |
| WBGene00019024 |        | F58A6.5    | 4.820464015 | 0.905714286 | 0.18788944  | 0 |
| WBGene00019568 |        | K09D9.11   | 4.29524586  | 0.905612245 | 0.210840607 | 0 |
| WBGene00007777 |        | C27D8.1    | 4.327480295 | 0.904285714 | 0.208963566 | 0 |
| WBGene00015765 |        | C14C11.1   | 4.259305319 | 0.902857143 | 0.211972863 | 0 |
| WBGene00015348 |        | C02F5.5    | 3.969014986 | 0.902857143 | 0.227476375 | 0 |
| WBGene00002120 | ins-37 | F08G2.6    | 4.593829668 | 0.901428571 | 0.196225946 | 0 |
| WBGene00044122 |        | T28B8.6    | 4.529305073 | 0.901428571 | 0.199021386 | 0 |
| WBGene00007778 |        | C27D8.2    | 4.422630914 | 0.901428571 | 0.203821795 | 0 |
| WBGene00009956 |        | F53B2.5    | 4.421575074 | 0.901428571 | 0.203870466 | 0 |
| WBGene00013700 |        | Y106G6D.3  | 4.143156135 | 0.901428571 | 0.217570505 | 0 |
| WBGene00012689 |        | Y39B6A.30  | 4.039981    | 0.901428571 | 0.223126933 | 0 |
| WBGene00013052 | scrm-7 | Y50E8A.9   | 3.823824097 | 0.901428571 | 0.235740073 | 0 |
| WBGene00010829 |        | M02B1.4    | 3.656103662 | 0.901428571 | 0.246554435 | 0 |
| WBGene00012087 |        | T27E7.1    | 4.143216544 | 0.9         | 0.217222535 | 0 |

|                |          |            |             |             |             |   |
|----------------|----------|------------|-------------|-------------|-------------|---|
| WBGene00017910 |          | F28H1.5    | 4.586878234 | 0.898571429 | 0.195900432 | 0 |
| WBGene00014240 | htas-1   | ZK1251.1   | 4.264327173 | 0.898571429 | 0.210718219 | 0 |
| WBGene00013476 |          | Y69E1A.4   | 4.007338031 | 0.897142857 | 0.223875014 | 0 |
| WBGene00017555 | nep-10   | F18A12.6   | 3.658503451 | 0.897142857 | 0.245221269 | 0 |
| WBGene00016612 |          | C43G2.3    | 3.263532091 | 0.897142857 | 0.274899352 | 0 |
| WBGene00009028 |          | F21H7.2    | 4.236954088 | 0.895714286 | 0.211405238 | 0 |
| WBGene00016461 |          | C35E7.9    | 4.032193402 | 0.895714286 | 0.222140705 | 0 |
| WBGene00015422 |          | C04E6.5    | 3.922200513 | 0.895714286 | 0.228370345 | 0 |
| WBGene00010883 |          | M7.7       | 3.908906386 | 0.895714286 | 0.229147029 | 0 |
| WBGene00017542 |          | F17E9.5    | 3.858772829 | 0.895714286 | 0.23212413  | 0 |
| WBGene00020468 |          | T13A10.1   | 3.610488111 | 0.895714286 | 0.248086757 | 0 |
| WBGene00016753 | oac-9    | C48E7.8    | 3.480146365 | 0.894761905 | 0.257104676 | 0 |
| WBGene00008243 |          | C50H2.7    | 4.33641903  | 0.894285714 | 0.206226776 | 0 |
| WBGene00010651 |          | K08C9.2    | 3.690785493 | 0.894285714 | 0.242302273 | 0 |
| WBGene00013175 |          | Y53F4B.36  | 3.613458753 | 0.894285714 | 0.247487456 | 0 |
| A_12_P159212   |          |            | 3.39719618  | 0.894285714 | 0.263242294 | 0 |
| WBGene00009473 |          | F36D3.8    | 3.314738271 | 0.894285714 | 0.269790747 | 0 |
| WBGene00008650 |          | F10D11.4   | 3.751788179 | 0.893214286 | 0.23807695  | 0 |
| WBGene00012855 |          | Y44A6D.5   | 3.750745167 | 0.892857143 | 0.238047935 | 0 |
| WBGene00009471 |          | F36D3.5    | 3.587305242 | 0.892857143 | 0.248893552 | 0 |
| WBGene00012177 | decr-1.2 | W01C9.4    | 3.508985598 | 0.892857143 | 0.254448791 | 0 |
| WBGene00018301 |          | F41G3.5    | 3.132308235 | 0.892857143 | 0.285047663 | 0 |
| WBGene00006057 | sss-2    | F47B8.11   | 4.863584703 | 0.891428571 | 0.183286326 | 0 |
| WBGene00007222 |          | C01F6.2    | 4.468905103 | 0.891428571 | 0.199473596 | 0 |
| WBGene00015634 |          | C09D4.3    | 4.433789731 | 0.891428571 | 0.201053416 | 0 |
| WBGene00023424 |          | C53D6.10   | 3.836586485 | 0.891428571 | 0.232349401 | 0 |
| WBGene00008423 |          | D2045.5    | 4.523183741 | 0.888571429 | 0.196448228 | 0 |
| WBGene00019015 |          | F57F4.1    | 4.483655458 | 0.888571429 | 0.198180132 | 0 |
| WBGene00019951 |          | R08C7.8    | 4.106547701 | 0.888571429 | 0.216379181 | 0 |
| WBGene00022705 |          | ZK354.2    | 3.583394553 | 0.888571429 | 0.247969185 | 0 |
| WBGene00008899 |          | F16H6.9    | 3.1615365   | 0.887755102 | 0.280798625 | 0 |
| WBGene00019461 |          | K07A3.3    | 3.76721315  | 0.887142857 | 0.235490486 | 0 |
| WBGene00020580 |          | T19D12.5   | 3.559203433 | 0.887142857 | 0.249253203 | 0 |
| WBGene00011790 |          | T15H9.5    | 3.589799547 | 0.885102041 | 0.246560297 | 0 |
| WBGene00015997 |          | C18H7.7    | 4.678433836 | 0.884285714 | 0.189013192 | 0 |
| WBGene00009670 |          | F43G9.8    | 4.623282196 | 0.884285714 | 0.191267951 | 0 |
| WBGene00020223 |          | T05A7.6    | 3.488873822 | 0.884285714 | 0.253458783 | 0 |
| WBGene00011134 | ssp-33   | R08A2.3    | 4.226247207 | 0.882857143 | 0.208898604 | 0 |
| WBGene00015093 |          | B0261.5    | 4.146664897 | 0.882857143 | 0.212907762 | 0 |
| WBGene00014813 |          | M176.9     | 4.120459469 | 0.882857143 | 0.214261819 | 0 |
| WBGene00020990 |          | W03D8.9    | 3.875148657 | 0.882857143 | 0.227825361 | 0 |
| WBGene00013744 |          | Y111B2A.27 | 3.688021223 | 0.882857143 | 0.239385049 | 0 |
| WBGene00004901 | snf-2    | F55H12.1   | 3.100539278 | 0.8825      | 0.284627905 | 0 |
| WBGene00015384 |          |            | 4.393099007 | 0.881428571 | 0.20063936  | 0 |
| WBGene00018792 |          | F54C1.8    | 4.057880321 | 0.881428571 | 0.217214038 | 0 |
| WBGene00022876 |          | ZK1248.5   | 3.971349269 | 0.881428571 | 0.221946878 | 0 |
| WBGene00020265 | fbxa-196 | T05H4.2    | 3.73813969  | 0.881428571 | 0.235793374 | 0 |
| WBGene00012870 |          | Y45F10B.2  | 3.517854159 | 0.881428571 | 0.250558588 | 0 |
| WBGene00008154 |          | C47E12.11  | 3.435600622 | 0.881428571 | 0.256557344 | 0 |
| WBGene00007081 |          | AH6.3      | 3.141539066 | 0.881428571 | 0.280572214 | 0 |
| WBGene00007337 |          | C05C12.5   | 4.539498431 | 0.88        | 0.193854016 | 0 |
| WBGene00017955 |          | F31E8.5    | 4.35425901  | 0.88        | 0.202100977 | 0 |
| WBGene00016954 |          | C55C3.4    | 3.873228012 | 0.88        | 0.22720067  | 0 |
| WBGene00014129 |          | ZK892.5    | 3.750456254 | 0.88        | 0.234638119 | 0 |
| WBGene00008487 |          | F01D4.3    | 3.648887616 | 0.88        | 0.24116939  | 0 |
| WBGene00010447 |          | K01A6.5    | 3.833024257 | 0.879438776 | 0.22943731  | 0 |
| WBGene00022094 |          | Y69A2AR.23 | 5.761378055 | 0.878571429 | 0.152493279 | 0 |
| WBGene00044633 |          | F54H12.7   | 5.660010536 | 0.878571429 | 0.155224345 | 0 |
| WBGene00020019 |          | R12B2.3    | 4.626814121 | 0.878571429 | 0.189886908 | 0 |
| WBGene00009149 |          | F26D2.10   | 4.204559174 | 0.878571429 | 0.208956847 | 0 |
| WBGene00021650 |          | Y47G6A.26  | 3.796609136 | 0.878571429 | 0.231409502 | 0 |
| WBGene00014996 |          | ZK1251.5   | 3.438902857 | 0.878571429 | 0.255480153 | 0 |
| WBGene00009941 |          | F52F12.8   | 3.493257413 | 0.878367347 | 0.251446499 | 0 |
| WBGene00021398 |          | Y38C1AA.7  | 3.878214541 | 0.877142857 | 0.226171824 | 0 |
| WBGene00019949 |          | R08C7.5    | 3.618911276 | 0.877142857 | 0.242377552 | 0 |

|                |          |            |             |             |             |   |
|----------------|----------|------------|-------------|-------------|-------------|---|
| WBGene00009708 |          | F44G3.7    | 3.589944369 | 0.877142857 | 0.244333273 | 0 |
| WBGene00044362 |          | F42G2.7    | 3.302559746 | 0.877142857 | 0.265594849 | 0 |
| WBGene00011425 |          | T04B2.7    | 4.000402095 | 0.875714286 | 0.218906566 | 0 |
| WBGene00020715 | nspd-4   | T23B7.1    | 3.506190882 | 0.875714286 | 0.249762296 | 0 |
| WBGene00019425 |          | K06A1.2    | 3.410563588 | 0.875714286 | 0.256765272 | 0 |
| WBGene00015192 |          | B0432.11   | 4.201357893 | 0.874571429 | 0.208163991 | 0 |
| WBGene00013707 |          | Y106G6E.3  | 4.417811013 | 0.874285714 | 0.197900207 | 0 |
| WBGene00009501 |          | F37A8.1    | 3.800285072 | 0.874285714 | 0.230057929 | 0 |
| WBGene00015690 |          | C10G11.10  | 3.794388344 | 0.874285714 | 0.230415454 | 0 |
| WBGene00017057 |          | D2062.5    | 5.178012593 | 0.872653061 | 0.168530502 | 0 |
| WBGene00044243 |          | F16C3.4    | 4.469527043 | 0.871428571 | 0.194971093 | 0 |
| WBGene00009513 | sfxn-1.2 | F37H8.4    | 4.190565087 | 0.871428571 | 0.207950134 | 0 |
| WBGene00011133 |          | R08A2.2    | 3.99954798  | 0.871428571 | 0.217881765 | 0 |
| WBGene00018000 |          | F33D11.1   | 3.357093701 | 0.871428571 | 0.259578269 | 0 |
| WBGene00019785 |          | M70.3      | 4.189879708 | 0.87        | 0.207643193 | 0 |
| WBGene00011203 |          | R10E4.7    | 3.939774826 | 0.87        | 0.220824803 | 0 |
| WBGene00019562 |          | K09C6.8    | 3.932532972 | 0.87        | 0.221231457 | 0 |
| WBGene00015820 |          | C16A11.7   | 3.770590811 | 0.87        | 0.230733072 | 0 |
| WBGene00011918 |          | T22C1.8    | 3.216839908 | 0.87        | 0.270451755 | 0 |
| WBGene00013785 | nep-23   | Y116A8C.4  | 3.098856809 | 0.87        | 0.280748693 | 0 |
| WBGene00016491 | acdH-5   | C37A2.3    | 3.984679098 | 0.867142857 | 0.217619245 | 0 |
| WBGene00044498 |          | Y59E9AR.10 | 3.933913262 | 0.867142857 | 0.220427549 | 0 |
| WBGene00004972 | spe-26   | R10H10.2   | 3.583930737 | 0.867142857 | 0.241953018 | 0 |
| WBGene00019086 |          | F59A6.4    | 3.422571683 | 0.867142857 | 0.253360028 | 0 |
| WBGene00009039 |          | F22B3.8    | 3.789438179 | 0.866326531 | 0.228616088 | 0 |
| WBGene00022632 |          | ZC581.2    | 3.681827345 | 0.865714286 | 0.23513169  | 0 |
| WBGene00011910 |          | T22B3.2    | 3.624301897 | 0.865714286 | 0.238863734 | 0 |
| WBGene00016949 |          | C55C2.3    | 4.430764494 | 0.864571429 | 0.195129177 | 0 |
| WBGene00018332 |          | F42A9.3    | 4.274818001 | 0.864285714 | 0.202180704 | 0 |
| WBGene00000019 | abt-1    | C24F3.5    | 4.26927877  | 0.864285714 | 0.202443026 | 0 |
| WBGene00018360 | irld-8   | F42G8.9    | 3.495516363 | 0.862857143 | 0.246846833 | 0 |
| A_12_P171291   |          |            | 4.973849854 | 0.862571429 | 0.173421284 | 0 |
| WBGene00010181 |          | F57A8.6    | 4.44002824  | 0.862142857 | 0.194175084 | 0 |
| A_12_P163028   |          |            | 3.206324128 | 0.862       | 0.268843687 | 0 |
| WBGene00077450 |          | K06B4.15   | 4.178202903 | 0.861428571 | 0.206172029 | 0 |
| WBGene00014241 |          | ZK1251.3   | 3.932349863 | 0.861428571 | 0.219062037 | 0 |
| WBGene00020978 |          | W03B1.9    | 4.993581347 | 0.860285714 | 0.172278302 | 0 |
| WBGene00009213 | thn-1    | F28D1.3    | 4.060869802 | 0.86        | 0.21177729  | 0 |
| WBGene00010254 |          | F58E6.5    | 3.863617092 | 0.86        | 0.222589346 | 0 |
| WBGene00007274 |          | C03C11.1   | 3.799041827 | 0.86        | 0.22637287  | 0 |
| WBGene00010324 |          | F59C6.3    | 3.547941538 | 0.86        | 0.242394073 | 0 |
| WBGene00011483 |          | T05E11.7   | 3.400958429 | 0.86        | 0.252869895 | 0 |
| WBGene00045247 |          | F54H12.8   | 4.072376447 | 0.858809524 | 0.210886576 | 0 |
| WBGene00007631 | wht-3    | C16C10.12  | 4.41927869  | 0.858571429 | 0.194278634 | 0 |
| WBGene00013429 |          | Y66D12A.3  | 4.320893307 | 0.858571429 | 0.198702298 | 0 |
| WBGene00000389 | cdc-25.4 | R05H5.2    | 3.854120433 | 0.858214286 | 0.222674486 | 0 |
| WBGene00004962 | spe-8    | F53G12.6   | 3.865715955 | 0.858095238 | 0.22197576  | 0 |
| WBGene00044741 |          | Y57G11C.52 | 4.155587916 | 0.857755102 | 0.206410048 | 0 |
| WBGene00021720 |          | Y49F6B.8   | 4.67927732  | 0.857142857 | 0.183178469 | 0 |
| WBGene00007080 | sfxn-1.1 | AH6.2      | 4.137239057 | 0.855714286 | 0.206832207 | 0 |
| WBGene00002193 | kin-5    | T13H10.1   | 4.378184605 | 0.855306122 | 0.195356341 | 0 |
| WBGene00018336 |          | F42A9.7    | 4.746365935 | 0.854285714 | 0.179987326 | 0 |
| WBGene00044634 |          | C29E4.14   | 3.487130026 | 0.854285714 | 0.244982466 | 0 |
| WBGene00017056 |          | D2062.4    | 3.630798332 | 0.853928571 | 0.235190306 | 0 |
| WBGene00015992 |          | C18H2.5    | 3.622096128 | 0.853571429 | 0.235656757 | 0 |
| WBGene00008724 |          | F13A7.1    | 4.163096658 | 0.852857143 | 0.20486124  | 0 |
| WBGene00014121 |          | ZK858.8    | 3.687386094 | 0.852857143 | 0.231290437 | 0 |
| WBGene00021579 | clec-73  | Y46C8AL.1  | 3.559013195 | 0.852857143 | 0.239633038 | 0 |
| WBGene00017553 | nep-8    | F18A12.4   | 3.481144369 | 0.852857143 | 0.244993328 | 0 |
| WBGene00018158 |          | F37E3.3    | 4.281325319 | 0.851428571 | 0.198870328 | 0 |
| WBGene00018529 |          | F47B3.5    | 3.752001181 | 0.851428571 | 0.22692652  | 0 |
| WBGene00015994 |          | C18H7.4    | 3.745299302 | 0.851428571 | 0.227332585 | 0 |
| WBGene00010980 |          | R02D5.7    | 3.737721368 | 0.851428571 | 0.227793484 | 0 |
| WBGene00012173 |          | W01B6.6    | 3.613565315 | 0.851428571 | 0.235620086 | 0 |
| WBGene00008870 |          | F15H9.1    | 3.274969078 | 0.850714286 | 0.25976254  | 0 |



|                |          |            |             |             |             |   |
|----------------|----------|------------|-------------|-------------|-------------|---|
| WBGene00015855 |          | C16C8.18   | 3.613938639 | 0.85        | 0.235200452 | 0 |
| WBGene00009401 |          | F35C11.2   | 3.246957178 | 0.85        | 0.261783557 | 0 |
| WBGene00008192 |          | C49C3.2    | 3.695066863 | 0.849642857 | 0.229939779 | 0 |
| WBGene00018949 | acbp-4   | F56C9.5    | 4.372888671 | 0.848571429 | 0.194052832 | 0 |
| WBGene00010992 |          | R03D7.8    | 4.239164958 | 0.848571429 | 0.200174194 | 0 |
| WBGene00018082 |          | F36A4.3    | 3.523439367 | 0.848027211 | 0.240681653 | 0 |
| WBGene00007572 |          | C14A6.8    | 4.998461763 | 0.847142857 | 0.169480712 | 0 |
| WBGene00008074 | nkb-2    | C43F9.6    | 4.443610817 | 0.847142857 | 0.190642901 | 0 |
| WBGene00018121 |          | F36H12.5   | 4.243235645 | 0.847142857 | 0.199645489 | 0 |
| WBGene00007378 |          | C06C3.8    | 3.259509817 | 0.847142857 | 0.259898851 | 0 |
| WBGene00020187 | gsp-4    | T03F1.5    | 4.331343604 | 0.845714286 | 0.19525449  | 0 |
| WBGene00007190 | rmd-3    | B0491.3    | 4.05357864  | 0.845714286 | 0.20863399  | 0 |
| WBGene00017055 |          | D2062.1    | 3.72718182  | 0.845714286 | 0.226904489 | 0 |
| A_12_P171289   |          |            | 4.529716843 | 0.844285714 | 0.186388188 | 0 |
| WBGene00013656 |          | Y105C5B.17 | 4.298608405 | 0.842857143 | 0.196076745 | 0 |
| WBGene00009016 |          | F21D9.2    | 3.363204548 | 0.842857143 | 0.250611323 | 0 |
| WBGene00009458 |          | F36A2.11   | 4.405115856 | 0.841428571 | 0.191011678 | 0 |
| WBGene00016010 |          | C23G10.1   | 4.123663634 | 0.841428571 | 0.204048789 | 0 |
| WBGene00044005 |          | F37C12.18  | 4.03222536  | 0.84        | 0.20832169  | 0 |
| WBGene00013148 |          | Y53F4A.2   | 4.001244602 | 0.84        | 0.209934679 | 0 |
| WBGene00010915 |          | M110.7     | 3.650763891 | 0.839714286 | 0.230010571 | 0 |
| WBGene00013586 |          | Y80D3A.8   | 3.714198474 | 0.83952381  | 0.22603095  | 0 |
| WBGene00044979 |          | Y41E3.19   | 4.727686014 | 0.838571429 | 0.177374603 | 0 |
| WBGene00017279 |          | F09C12.8   | 4.315948238 | 0.838571429 | 0.194295988 | 0 |
| WBGene00019151 | pck-3    | H04M03.1   | 4.208511867 | 0.838571429 | 0.199256045 | 0 |
| WBGene00014174 |          | ZK970.8    | 4.093777041 | 0.838571429 | 0.204840523 | 0 |
| WBGene00019530 | scrm-8   | K08D10.7   | 3.784168896 | 0.838571429 | 0.221599895 | 0 |
| WBGene00018083 |          | F36A4.4    | 3.706125308 | 0.838571429 | 0.226266345 | 0 |
| WBGene00000023 | abt-5    | Y53C10A.9  | 4.008645914 | 0.837619048 | 0.208953114 | 0 |
| WBGene00007733 |          | C25G4.6    | 4.495012587 | 0.837142857 | 0.186238156 | 0 |
| WBGene00012636 |          | Y38H8A.2   | 4.296995021 | 0.837142857 | 0.194820532 | 0 |
| WBGene00019459 |          | K06H7.8    | 4.226929148 | 0.837142857 | 0.198049891 | 0 |
| WBGene00014032 |          | ZK637.15   | 4.075830075 | 0.837142857 | 0.205391992 | 0 |
| WBGene00010672 |          | K08E7.4    | 3.455345414 | 0.837142857 | 0.242274724 | 0 |
| WBGene00008001 |          | C38C10.3   | 3.435727284 | 0.837142857 | 0.243658122 | 0 |
| WBGene00012012 |          | T25B9.6    | 4.176978675 | 0.836904762 | 0.200361272 | 0 |
| WBGene00007641 |          | C17E4.1    | 4.336492309 | 0.836530612 | 0.192904899 | 0 |
| WBGene00015165 |          | B0361.11   | 4.579631947 | 0.836394558 | 0.182633576 | 0 |
| WBGene00009463 |          | F36D1.4    | 4.047395478 | 0.835714286 | 0.206481993 | 0 |
| WBGene00022707 |          | ZK354.6    | 3.791798926 | 0.835714286 | 0.220400475 | 0 |
| WBGene00009962 |          | F53B6.7    | 3.434519704 | 0.835714286 | 0.243327847 | 0 |
| WBGene00012172 |          | W01B6.5    | 3.429120306 | 0.835714286 | 0.243710984 | 0 |
| WBGene00006049 | ssp-32   | F32B6.7    | 5.393791636 | 0.834285714 | 0.154675184 | 0 |
| WBGene00016054 |          | C24D10.2   | 3.970240046 | 0.834285714 | 0.210134829 | 0 |
| WBGene00013304 |          | Y57G11C.6  | 3.700467257 | 0.834285714 | 0.225454154 | 0 |
| WBGene00018580 |          | F47G6.3    | 3.432800253 | 0.834285714 | 0.243033574 | 0 |
| WBGene00012784 |          | Y43C5A.4   | 4.676589379 | 0.832857143 | 0.178090714 | 0 |
| WBGene00020661 |          | T21G5.4    | 4.077681874 | 0.832857143 | 0.2042477   | 0 |
| WBGene00009652 |          | F43D2.3    | 4.014760493 | 0.832857143 | 0.207448774 | 0 |
| WBGene00011132 |          | R08A2.1    | 4.395190845 | 0.831428571 | 0.189167797 | 0 |
| WBGene00022890 | fbxa-224 | ZK1290.9   | 4.348314343 | 0.831428571 | 0.191207099 | 0 |
| WBGene00015929 |          | C17H12.3   | 3.820119167 | 0.831428571 | 0.217644669 | 0 |
| WBGene00010014 |          | F54B3.2    | 3.608481115 | 0.831428571 | 0.230409567 | 0 |
| WBGene00006039 | ssp-10   | K07F5.9    | 5.010543515 | 0.83        | 0.165650692 | 0 |
| WBGene00022617 |          | ZC477.2    | 3.656764933 | 0.83        | 0.22697658  | 0 |
| WBGene00018745 |          | F53C3.1    | 3.640182719 | 0.83        | 0.228010532 | 0 |
| WBGene00018926 |          | F56A11.6   | 3.399604091 | 0.83        | 0.244146076 | 0 |
| A_12_P181511   |          |            | 3.460609963 | 0.829714286 | 0.23975955  | 0 |
| WBGene00014229 |          | ZK1128.3   | 4.583058028 | 0.828571429 | 0.18079008  | 0 |
| WBGene00010874 |          | M05D6.1    | 4.008914967 | 0.828571429 | 0.206682216 | 0 |
| WBGene00018839 |          | F54H5.2    | 3.666723241 | 0.828571429 | 0.225970539 | 0 |
| WBGene00018980 |          | F56F4.3    | 3.317067474 | 0.827380952 | 0.249431451 | 0 |
| WBGene00010728 |          | K09G1.2    | 4.473366233 | 0.827142857 | 0.184903899 | 0 |
| WBGene00002263 | lea-1    | K08H10.1   | 3.949773005 | 0.827142857 | 0.209415289 | 0 |
| WBGene00022064 |          | Y67D8B.5   | 3.537605012 | 0.827142857 | 0.233814362 | 0 |

|                |          |            |             |             |             |   |
|----------------|----------|------------|-------------|-------------|-------------|---|
| WBGene00008871 | tag-314  | F15H10.4   | 3.96600435  | 0.826285714 | 0.20834211  | 0 |
| WBGene00009693 |          | F44F1.1    | 3.498406707 | 0.82622449  | 0.236171652 | 0 |
| WBGene00017554 | nep-9    | F18A12.5   | 3.630750701 | 0.825714286 | 0.227422468 | 0 |
| WBGene00022709 |          | ZK354.8    | 3.470964873 | 0.825714286 | 0.237891859 | 0 |
| WBGene00010035 |          | F54C8.1    | 4.581167192 | 0.824285714 | 0.179929193 | 0 |
| WBGene00016312 |          | C32D5.4    | 3.773341681 | 0.824285714 | 0.218449794 | 0 |
| WBGene00012486 |          | Y18D10A.21 | 3.963531966 | 0.822857143 | 0.207607041 | 0 |
| WBGene00007300 |          | C04F12.6   | 3.320676515 | 0.822857143 | 0.247798043 | 0 |
| WBGene00008299 |          | C54D10.4   | 3.933289047 | 0.821714286 | 0.208912764 | 0 |
| WBGene00016336 |          | C33C12.4   | 3.937598831 | 0.821428571 | 0.208611544 | 0 |
| WBGene00019642 |          | K11C4.1    | 3.465531227 | 0.821428571 | 0.237028183 | 0 |
| WBGene00044392 |          | C25H3.16   | 3.496507613 | 0.821142857 | 0.234846581 | 0 |
| WBGene00015084 |          | B0244.9    | 4.884248269 | 0.82        | 0.167886634 | 0 |
| WBGene00007714 |          | C25D7.1    | 4.575070377 | 0.82        | 0.179232216 | 0 |
| WBGene00007249 |          | C01G12.9   | 3.81383528  | 0.82        | 0.215006664 | 0 |
| WBGene00020940 |          | W02D7.4    | 3.711396504 | 0.82        | 0.220941093 | 0 |
| WBGene00017015 |          | D1014.2    | 3.263462669 | 0.819387755 | 0.251079249 | 0 |
| WBGene00020105 |          | R148.7     | 4.506231567 | 0.818571429 | 0.18165321  | 0 |
| WBGene00018575 | clec-119 | F47F6.5    | 3.290365735 | 0.818571429 | 0.24877825  | 0 |
| WBGene00020991 |          | W03D8.10   | 3.272134271 | 0.818571429 | 0.250164376 | 0 |
| WBGene00013478 |          | Y69E1A.8   | 3.257354866 | 0.818       | 0.251124005 | 0 |
| WBGene00044300 |          | D1022.9    | 3.5591075   | 0.817714286 | 0.229752624 | 0 |
| WBGene00014082 |          | ZK795.2    | 3.658641393 | 0.817142857 | 0.223345983 | 0 |
| WBGene00010241 |          | F58D2.2    | 3.302947007 | 0.817142857 | 0.247398113 | 0 |
| WBGene00013085 | mpz-6    | Y51B9A.3   | 4.980182259 | 0.816857143 | 0.164021536 | 0 |
| WBGene00010474 |          | K01D12.15  | 4.238929596 | 0.815714286 | 0.192434025 | 0 |
| WBGene00007559 |          | C14A4.8    | 3.886016729 | 0.814285714 | 0.209542514 | 0 |
| WBGene00002227 | klp-17   | W02B12.7   | 3.859391838 | 0.814285714 | 0.21098809  | 0 |
| WBGene00006058 | sst-20   | F54C1.9    | 3.277983039 | 0.814285714 | 0.248410594 | 0 |
| WBGene00044476 |          | F56D6.14   | 3.380626944 | 0.812959184 | 0.240475864 | 0 |
| WBGene00021908 |          | Y55B1AR.4  | 4.410805503 | 0.812857143 | 0.184287687 | 0 |
| WBGene00016462 |          | C35E7.10   | 3.472906933 | 0.812857143 | 0.234056702 | 0 |
| WBGene00009550 |          | F38H4.6    | 4.319349726 | 0.811714286 | 0.187925113 | 0 |
| WBGene00014851 |          | W01G7.2    | 5.117351325 | 0.811428571 | 0.158564171 | 0 |
| WBGene00011749 | ssp-36   | T13F2.12   | 4.161052145 | 0.811428571 | 0.195005624 | 0 |
| A_12_P101271   |          |            | 4.115501537 | 0.811428571 | 0.197163958 | 0 |
| WBGene00007148 |          | B0334.10   | 4.020383775 | 0.811428571 | 0.201828636 | 0 |
| WBGene00007508 |          | C10C5.4    | 4.148013774 | 0.81        | 0.195274183 | 0 |
| WBGene00020072 |          | R13H9.6    | 3.725836267 | 0.81        | 0.217400858 | 0 |
| WBGene00007082 | acs-10   | AH10.1     | 3.375893145 | 0.81        | 0.239936504 | 0 |
| WBGene00022006 | mpst-5   | 59H11AM.   | 3.105639627 | 0.81        | 0.260815837 | 0 |
| WBGene00013712 | dlc-6    | Y106GG6.3  | 4.358356892 | 0.809795918 | 0.18580303  | 0 |
| WBGene00017215 |          | F07F6.1    | 3.490970146 | 0.80952381  | 0.231890786 | 0 |
| WBGene00000748 | col-175  | C35B8.1    | 3.916978375 | 0.808571429 | 0.20642734  | 0 |
| WBGene00015627 |          | C09B9.2    | 3.524876353 | 0.808571429 | 0.229390012 | 0 |
| WBGene00012912 |          | Y46G5A.22  | 3.158094213 | 0.808571429 | 0.256031446 | 0 |
| WBGene00017384 |          | F11G11.4   | 3.987058492 | 0.807142857 | 0.202440686 | 0 |
| WBGene00077548 |          | F21C3.7    | 3.184230388 | 0.807142857 | 0.2534813   | 0 |
| WBGene00007584 |          | C14C10.1   | 4.279542092 | 0.805714286 | 0.188271144 | 0 |
| WBGene00007888 | ttr-9    | C33A12.15  | 4.277892939 | 0.805714286 | 0.188343724 | 0 |
| WBGene00010612 |          | K07A1.5    | 4.264014091 | 0.802857143 | 0.1882867   | 0 |
| WBGene00015696 |          | C10H11.7   | 4.871500868 | 0.801428571 | 0.164513688 | 0 |
| WBGene00013190 |          | Y54E2A.5   | 3.67952343  | 0.801428571 | 0.21780771  | 0 |
| WBGene00012638 |          | Y38H8A.4   | 4.629471902 | 0.8         | 0.172805887 | 0 |
| WBGene00008124 |          | C47A4.3    | 4.621229288 | 0.8         | 0.173114111 | 0 |
| WBGene00008313 |          | C54G4.3    | 4.072117403 | 0.8         | 0.19645799  | 0 |
| WBGene00018548 | clec-79  | F47C12.4   | 3.958738914 | 0.8         | 0.202084557 | 0 |
| WBGene00019063 |          | F58F12.3   | 3.221373617 | 0.798809524 | 0.24797171  | 0 |
| WBGene00009313 |          | F32B4.2    | 3.266718581 | 0.798571429 | 0.244456756 | 0 |
| WBGene00018494 |          | F46F5.2    | 4.429839666 | 0.798367347 | 0.180224886 | 0 |
| WBGene00012207 |          | W02B12.12  | 3.57391091  | 0.797142857 | 0.223044972 | 0 |
| WBGene00010543 |          | K03H1.8    | 3.526038338 | 0.797142857 | 0.226073225 | 0 |
| WBGene00012191 |          | W02A2.8    | 3.711626558 | 0.794857143 | 0.214153318 | 0 |
| WBGene00022799 |          | ZK688.4    | 3.280581905 | 0.794761905 | 0.242262479 | 0 |
| WBGene00013524 |          | Y73F8A.15  | 4.383430661 | 0.794285714 | 0.181201843 | 0 |

|                |         |            |             |             |             |   |
|----------------|---------|------------|-------------|-------------|-------------|---|
| WBGene00013890 |         | ZC412.9    | 4.052612244 | 0.794285714 | 0.195993514 | 0 |
| WBGene00008382 |         | D1081.4    | 3.746799855 | 0.794285714 | 0.211990431 | 0 |
| WBGene00022849 | acs-6   | ZK1127.2   | 4.607002283 | 0.792857143 | 0.172098274 | 0 |
| WBGene00007224 |         | C01G6.2    | 4.067514881 | 0.792857143 | 0.194924214 | 0 |
| WBGene00018930 |         | F56B3.6    | 3.822525431 | 0.792857143 | 0.207417101 | 0 |
| WBGene00001424 | fis-1   | F41G3.4    | 3.210797528 | 0.792857143 | 0.246934643 | 0 |
| WBGene00010466 |         | K01D12.7   | 4.053829328 | 0.791428571 | 0.19522987  | 0 |
| WBGene00007269 |         | C03C10.2   | 3.771719861 | 0.791428571 | 0.209832278 | 0 |
| WBGene00014168 |         | ZK945.6    | 3.214546582 | 0.791428571 | 0.246202241 | 0 |
| WBGene00015051 |         | B0218.7    | 3.964224435 | 0.79        | 0.19928236  | 0 |
| WBGene00008272 |         | C53B4.2    | 3.793358895 | 0.79        | 0.208258702 | 0 |
| WBGene00016360 |         | C33G8.2    | 3.272023486 | 0.79        | 0.24144081  | 0 |
| WBGene00014752 |         | F38E11.8   | 4.408433984 | 0.789761905 | 0.179147949 | 0 |
| WBGene00015931 |         | C17H12.5   | 4.354398796 | 0.788571429 | 0.181097659 | 0 |
| WBGene00018163 |         | F38A5.6    | 4.32790444  | 0.788571429 | 0.182206294 | 0 |
| WBGene00011808 |         | T16G12.7   | 4.10517982  | 0.788571429 | 0.192091812 | 0 |
| WBGene00016083 |         | C25A8.2    | 3.657311804 | 0.788571429 | 0.215615039 | 0 |
| WBGene00017802 |         | F26A1.3    | 3.190734754 | 0.788571429 | 0.24714415  | 0 |
| WBGene00013053 |         | Y50E8A.10  | 3.237398665 | 0.787857143 | 0.243361175 | 0 |
| WBGene00012250 |         | W04E12.5   | 4.003292916 | 0.787142857 | 0.196623848 | 0 |
| A_12_P164656   |         |            | 3.546702046 | 0.787142857 | 0.221936562 | 0 |
| WBGene00016950 |         | C55C2.4    | 5.303628408 | 0.786857143 | 0.148362042 | 0 |
| WBGene00009470 |         | F36D3.4    | 4.376240486 | 0.785714286 | 0.17954093  | 0 |
| WBGene00009321 |         | F32B6.4    | 3.65594709  | 0.785714286 | 0.21491402  | 0 |
| WBGene00019165 | mpz-4   | H06H21.9   | 3.551349084 | 0.785714286 | 0.22124389  | 0 |
| WBGene00007986 |         | C36F7.5    | 3.253601689 | 0.785714286 | 0.241490619 | 0 |
| A_12_P170017   |         |            | 3.414938431 | 0.784591837 | 0.22975285  | 0 |
| WBGene00012786 |         | Y43C5B.3   | 3.613522377 | 0.784285714 | 0.217041887 | 0 |
| WBGene00021878 |         | Y54G2A.13  | 3.3486924   | 0.784285714 | 0.234206556 | 0 |
| WBGene00013388 |         | Y62F5A.10  | 3.276405092 | 0.784285714 | 0.239373854 | 0 |
| WBGene00009160 |         | F26E4.5    | 3.200236832 | 0.784285714 | 0.245071148 | 0 |
| WBGene00013449 |         | Y67A6A.1   | 4.005464596 | 0.783714286 | 0.195661269 | 0 |
| WBGene00011008 |         | R04B5.11   | 3.958134967 | 0.783571429 | 0.197964808 | 0 |
| WBGene00012010 |         | T25B9.4    | 3.512348672 | 0.782857143 | 0.222887081 | 0 |
| WBGene00020177 |         | T02H6.7    | 3.441487678 | 0.782857143 | 0.227476375 | 0 |
| WBGene00008141 |         | C47E8.1    | 3.23093575  | 0.782857143 | 0.242300437 | 0 |
| A_12_P164040   |         |            | 3.247292223 | 0.782285714 | 0.240904009 | 0 |
| WBGene00016587 |         | C42C1.9    | 3.631275912 | 0.781428571 | 0.21519394  | 0 |
| WBGene00013651 |         | Y105C5B.11 | 3.236216994 | 0.780571429 | 0.24119873  | 0 |
| WBGene00007633 |         | C16D2.1    | 4.72366662  | 0.778571429 | 0.164823535 | 0 |
| WBGene00006509 | tag-164 | Y76A2A.1   | 4.347034163 | 0.778571429 | 0.179104051 | 0 |
| WBGene00005650 | srp-9   | F09C6.5    | 3.491554277 | 0.778571429 | 0.222987062 | 0 |
| WBGene00016181 |         | C28C12.11  | 4.266073863 | 0.775714286 | 0.181833299 | 0 |
| WBGene00021633 |         | Y47G6A.3   | 4.169658572 | 0.775714286 | 0.186037843 | 0 |
| WBGene00050940 |         | C25D7.16   | 3.334164109 | 0.775238095 | 0.232513479 | 0 |
| WBGene00013579 |         | Y79H2A.2   | 3.947118171 | 0.774285714 | 0.196164817 | 0 |
| WBGene00012297 |         | W06D4.3    | 3.764168494 | 0.774285714 | 0.205699005 | 0 |
| WBGene00021537 |         | Y42H9AR.2  | 3.46494613  | 0.774285714 | 0.223462555 | 0 |
| WBGene00016963 |         | C56C10.6   | 3.434337762 | 0.774285714 | 0.225454154 | 0 |
| WBGene00019257 | dhhc-13 | H32C10.3   | 3.250465587 | 0.774285714 | 0.238207633 | 0 |
| WBGene00045306 |         | ZC250.5    | 4.017740793 | 0.772857143 | 0.192361126 | 0 |
| A_12_P171288   |         |            | 3.478262305 | 0.772857143 | 0.222196337 | 0 |
| WBGene00044434 |         | Y18H1A.15  | 3.275600172 | 0.772857143 | 0.235943675 | 0 |
| WBGene00016053 |         | C24D10.1   | 3.260196897 | 0.772857143 | 0.237058425 | 0 |
| WBGene00010114 |         | F55D12.6   | 3.868294737 | 0.771428571 | 0.199423421 | 0 |
| WBGene00007239 |         | C01G10.14  | 3.537220101 | 0.771428571 | 0.218088937 | 0 |
| WBGene00017559 | mpz-3   | F18C5.4    | 4.149491032 | 0.769142857 | 0.185358361 | 0 |
| WBGene00019512 |         | K08A2.2    | 3.777272702 | 0.768571429 | 0.203448112 | 0 |
| A_12_P164654   |         |            | 3.501659511 | 0.768571429 | 0.219487767 | 0 |
| WBGene00012180 |         | W01D2.3    | 4.17080647  | 0.767142857 | 0.18393154  | 0 |
| WBGene00017387 | mpst-4  | F11G11.9   | 3.156720454 | 0.767142857 | 0.24301894  | 0 |
| WBGene00020293 | nep-20  | T06D4.4    | 3.393142603 | 0.766785714 | 0.225980987 | 0 |
| WBGene00015097 |         | B0273.1    | 3.862272752 | 0.765714286 | 0.198254845 | 0 |
| WBGene00016212 |         | C29F5.3    | 3.221961931 | 0.765714286 | 0.237654666 | 0 |
| WBGene00013299 | irld-18 | Y57G11B.7  | 3.153811463 | 0.765714286 | 0.242790127 | 0 |

|                |         |            |             |             |             |   |
|----------------|---------|------------|-------------|-------------|-------------|---|
| WBGene00009605 |         | F40G12.10  | 3.144035447 | 0.765714286 | 0.243545055 | 0 |
| WBGene00022385 |         | Y95B8A.4   | 3.492317777 | 0.764285714 | 0.2188477   | 0 |
| WBGene00021447 |         | Y39A3CR.8  | 4.416269295 | 0.761142857 | 0.172349738 | 0 |
| WBGene00017808 | nspd-9  | F26A1.10   | 3.694677781 | 0.76        | 0.205701294 | 0 |
| WBGene00012877 |         | Y45F10C.1  | 4.994040021 | 0.75877551  | 0.151936209 | 0 |
| WBGene00020898 |         | T28D9.9    | 3.551677393 | 0.758707483 | 0.213619481 | 0 |
| WBGene00017550 | nep-6   | F18A12.1   | 3.727680384 | 0.758571429 | 0.203496907 | 0 |
| WBGene00018999 |         | F57B9.8    | 3.309899611 | 0.758571429 | 0.229182609 | 0 |
| WBGene00016398 |         | C34D4.2    | 3.205997044 | 0.758       | 0.236431909 | 0 |
| WBGene00016420 |         | C34G6.3    | 4.054638968 | 0.757142857 | 0.186734963 | 0 |
| WBGene00011120 |         | R07E5.15   | 3.722152404 | 0.755714286 | 0.203031527 | 0 |
| WBGene00022735 |         | ZK418.6    | 3.620021245 | 0.755714286 | 0.208759627 | 0 |
| WBGene00018004 |         | F33D11.7   | 3.480688921 | 0.755714286 | 0.217116296 | 0 |
| A_12_P164657   |         |            | 3.112788015 | 0.755714286 | 0.242777305 | 0 |
| WBGene00021608 |         | Y46H3D.1   | 3.967373165 | 0.754571429 | 0.190194216 | 0 |
| WBGene00011438 |         | T04F3.3    | 3.701764473 | 0.754285714 | 0.203763832 | 0 |
| WBGene00021787 |         | Y51H7C.9   | 3.40728555  | 0.754285714 | 0.221374377 | 0 |
| WBGene00016807 |         | C50D2.3    | 4.789141856 | 0.752857143 | 0.157200844 | 0 |
| WBGene00015661 |         | C09H5.7    | 4.367754586 | 0.752857143 | 0.172367089 | 0 |
| WBGene00006053 | ssq-4   | T28H11.1   | 3.376881236 | 0.752857143 | 0.222944513 | 0 |
| WBGene00013310 |         | Y57G11C.14 | 3.227716511 | 0.752857143 | 0.233247604 | 0 |
| WBGene00015345 |         | C02F5.2    | 4.95540771  | 0.752585034 | 0.151871466 | 0 |
| WBGene00044261 |         | Y87G2A.20  | 3.168969674 | 0.751428571 | 0.237120783 | 0 |
| WBGene00017647 |         | F20H11.4   | 4.332916127 | 0.75        | 0.173093588 | 0 |
| WBGene00011919 |         | T22C1.9    | 4.015879907 | 0.75        | 0.186758573 | 0 |
| WBGene00002186 | kel-10  | T16H12.6   | 3.882171142 | 0.75        | 0.193190865 | 0 |
| WBGene00016441 |         | C35D10.3   | 3.672510741 | 0.75        | 0.204219961 | 0 |
| WBGene00021792 |         | Y52D5A.1   | 3.518306462 | 0.749714286 | 0.213089534 | 0 |
| WBGene00017050 |         | D2024.1    | 3.528216527 | 0.749285714 | 0.212369538 | 0 |
| WBGene00013854 | cyc-2.2 | ZC116.2    | 3.73525654  | 0.748571429 | 0.200406966 | 0 |
| WBGene00010265 |         | F58G1.3    | 3.478102973 | 0.748571429 | 0.215224056 | 0 |
| WBGene00014154 |         | ZK930.4    | 3.115914499 | 0.748571429 | 0.240241325 | 0 |
| A_12_P171287   |         |            | 3.209627049 | 0.747380952 | 0.232856011 | 0 |
| WBGene00015210 |         | B0496.1    | 3.416777432 | 0.747142857 | 0.218668869 | 0 |
| WBGene00016322 |         | C32E8.4    | 4.198827307 | 0.745714286 | 0.177600609 | 0 |
| WBGene00016956 |         | C55C3.6    | 3.64752286  | 0.745714286 | 0.204444034 | 0 |
| WBGene00007335 |         | C05C12.1   | 3.106977707 | 0.745714286 | 0.240012757 | 0 |
| WBGene00007457 |         | C08F11.10  | 3.797169695 | 0.744285714 | 0.196010654 | 0 |
| A_12_P101810   |         |            | 3.501815837 | 0.744285714 | 0.212542792 | 0 |
| WBGene00012307 |         | W06F12.3   | 3.527879722 | 0.742857143 | 0.210567593 | 0 |
| WBGene00044896 |         | K12C11.5   | 3.39306603  | 0.742857143 | 0.218933889 | 0 |
| WBGene00012535 |         | Y37A1A.2   | 3.156657947 | 0.742857143 | 0.235330262 | 0 |
| WBGene00008312 |         | C54G4.2    | 3.918302811 | 0.741428571 | 0.189221867 | 0 |
| WBGene00012102 |         | T27F6.1    | 4.604601242 | 0.741102041 | 0.160948148 | 0 |
| WBGene00016388 |         | C34B2.3    | 3.671697574 | 0.74        | 0.201541653 | 0 |
| WBGene00044127 |         | BE10.5     | 3.612972523 | 0.74        | 0.2048175   | 0 |
| WBGene00010719 |         | K09E4.1    | 3.371808068 | 0.74        | 0.219466822 | 0 |
| WBGene00021472 |         | Y39G10AR.1 | 3.298215624 | 0.74        | 0.224363742 | 0 |
| WBGene00020533 |         | T16A1.2    | 3.297353267 | 0.738367347 | 0.22392728  | 0 |
| WBGene00009492 |         | F36H1.3    | 3.986632307 | 0.738333333 | 0.185202265 | 0 |
| WBGene00015944 |         | C18A3.7    | 3.431423155 | 0.737142857 | 0.214821322 | 0 |
| WBGene00013710 |         | Y106G6G.1  | 3.255368241 | 0.737142857 | 0.226439162 | 0 |
| WBGene00009129 |         | F25H5.7    | 3.565294206 | 0.735714286 | 0.206354439 | 0 |
| WBGene00000878 | cyn-2   | ZK520.5    | 3.642493717 | 0.734285714 | 0.201588739 | 0 |
| WBGene00019084 |         | F59A6.2    | 3.250402655 | 0.734285714 | 0.225906078 | 0 |
| WBGene00009759 | ttr-12  | F46B3.4    | 3.31938721  | 0.731428571 | 0.220350482 | 0 |
| WBGene00011322 | irld-14 | T01C3.5    | 3.234814188 | 0.731428571 | 0.226111464 | 0 |
| WBGene00016946 |         | C55B7.10   | 3.781387292 | 0.73        | 0.193050842 | 0 |
| WBGene00011241 | mpz-5   | R11A8.8    | 3.294317604 | 0.73        | 0.221593692 | 0 |
| WBGene00021639 |         | Y47G6A.13  | 3.416930385 | 0.728571429 | 0.21322396  | 0 |
| WBGene00017922 |         | F29B9.7    | 3.396114019 | 0.727142857 | 0.21411026  | 0 |
| WBGene00022650 |         | ZK84.2     | 3.835464651 | 0.725714286 | 0.189211569 | 0 |
| WBGene00010082 |         | F55A11.11  | 3.722681666 | 0.725714286 | 0.194943955 | 0 |
| A_12_P114047   |         |            | 3.173934842 | 0.725714286 | 0.228648136 | 0 |
| WBGene00007597 |         | C15A11.2   | 3.423556414 | 0.724285714 | 0.211559451 | 0 |

|                |         |            |             |             |             |   |
|----------------|---------|------------|-------------|-------------|-------------|---|
| WBGene00011191 |         | R10D12.10  | 3.214176595 | 0.724285714 | 0.225340983 | 0 |
| WBGene00021428 |         | Y38F2AR.10 | 3.209344456 | 0.724285714 | 0.225680267 | 0 |
| WBGene00013475 |         | Y69E1A.3   | 3.400702064 | 0.724047619 | 0.212911218 | 0 |
| WBGene00020174 |         | T02H6.4    | 3.349629774 | 0.723428571 | 0.215972696 | 0 |
| WBGene00017853 |         | F27C1.3    | 3.565183648 | 0.72        | 0.201953131 | 0 |
| WBGene00016085 |         | C25A8.5    | 3.11512657  | 0.72        | 0.231130256 | 0 |
| WBGene00013657 |         | Y105C5B.18 | 3.845921402 | 0.718571429 | 0.186839863 | 0 |
| WBGene00017175 | irld-3  | F02C9.4    | 3.338791786 | 0.717142857 | 0.214791129 | 0 |
| WBGene00010300 |         | F59A1.15   | 3.375340146 | 0.71547619  | 0.211971582 | 0 |
| A_12_P164658   |         |            | 4.031750262 | 0.714285714 | 0.177165168 | 0 |
| WBGene00001605 | gln-4   | T25C8.3    | 3.192535839 | 0.712857143 | 0.223288689 | 0 |
| WBGene00021967 |         | Y57G7A.3   | 3.431680505 | 0.712653061 | 0.207668826 | 0 |
| WBGene00008235 |         | C50F4.10   | 3.692759493 | 0.711428571 | 0.192654998 | 0 |
| WBGene00019081 |         | F59A3.8    | 3.149897143 | 0.711428571 | 0.225857715 | 0 |
| WBGene00023490 |         | F36A2.14   | 3.382816192 | 0.707142857 | 0.209039693 | 0 |
| WBGene00007863 |         | C32C4.3    | 3.147028823 | 0.705714286 | 0.224247799 | 0 |
| WBGene00019810 |         | R01H2.2    | 3.651549621 | 0.704285714 | 0.192873105 | 0 |
| WBGene00010184 |         | F57A10.2   | 4.295071673 | 0.701428571 | 0.163310097 | 0 |
| WBGene00009590 | ttr-4   | F40F12.1   | 3.287977297 | 0.7         | 0.212896847 | 0 |
| WBGene00016730 |         | C46H11.6   | 3.806789521 | 0.698367347 | 0.183453102 | 0 |
| WBGene00013979 |         | ZK507.3    | 4.331173947 | 0.697142857 | 0.16095933  | 0 |
| WBGene00014005 |         | ZK593.9    | 3.260170325 | 0.695714286 | 0.213398141 | 0 |
| WBGene00016778 | nep-3   | C49D10.10  | 3.143116243 | 0.695714286 | 0.221345388 | 0 |
| WBGene00008155 |         | C47E12.12  | 3.930766181 | 0.694285714 | 0.176628597 | 0 |
| WBGene00009416 |         | F35E2.9    | 3.626549138 | 0.694285714 | 0.19144528  | 0 |
| WBGene00012627 |         | Y38H6C.15  | 3.182758249 | 0.694285714 | 0.218139632 | 0 |
| WBGene00012169 |         | W01B6.2    | 3.149068577 | 0.694285714 | 0.220473355 | 0 |
| WBGene00015241 |         | B0524.2    | 4.827659895 | 0.692857143 | 0.143518218 | 0 |
| WBGene00010371 |         | H06O01.4   | 4.023036841 | 0.692857143 | 0.172222421 | 0 |
| WBGene00007563 |         | C14A4.13   | 3.681218268 | 0.692857143 | 0.188214089 | 0 |
| WBGene00050956 |         | C14A6.13   | 3.569725406 | 0.692857143 | 0.19409256  | 0 |
| A_12_P164042   |         |            | 3.272412582 | 0.692857143 | 0.211726708 | 0 |
| WBGene00004964 | spe-10  | AC3.10     | 3.158117315 | 0.692857143 | 0.219389299 | 0 |
| WBGene00022080 |         |            | 3.432644755 | 0.691836735 | 0.201546267 | 0 |
| WBGene00018394 |         | F43E2.6    | 3.674793254 | 0.691428571 | 0.188154414 | 0 |
| WBGene00010763 |         | K10H10.7   | 3.681108352 | 0.691190476 | 0.187766947 | 0 |
| WBGene00016320 |         | C32E8.1    | 3.477074416 | 0.690979592 | 0.198724419 | 0 |
| WBGene00021006 | dct-9   | W03F11.3   | 3.727808226 | 0.69        | 0.185095358 | 0 |
| WBGene00000751 | col-178 | C34F6.2    | 3.442545695 | 0.69        | 0.200433069 | 0 |
| WBGene00022530 |         | ZC155.2    | 3.201278863 | 0.689142857 | 0.215271111 | 0 |
| WBGene00021175 | math-46 | Y8G1A.1    | 3.974531023 | 0.688571429 | 0.173245956 | 0 |
| WBGene00008854 |         | F15D3.4    | 4.233523515 | 0.685952381 | 0.162028716 | 0 |
| WBGene00022108 |         | Y71F9AL.2  | 3.536999257 | 0.685714286 | 0.193868937 | 0 |
| A_12_P164043   |         |            | 3.168289764 | 0.685714286 | 0.21643042  | 0 |
| WBGene00012979 |         | Y48B6A.5   | 4.157311204 | 0.684897959 | 0.164745415 | 0 |
| WBGene00022085 |         | Y69A2AR.14 | 3.577938008 | 0.684761905 | 0.191384508 | 0 |
| WBGene00014053 |         | ZK669.3    | 3.504977193 | 0.681428571 | 0.194417405 | 0 |
| WBGene00012741 |         | Y40H4A.2   | 3.68454226  | 0.68        | 0.184554811 | 0 |
| WBGene00009043 |         | F22B5.5    | 3.295264664 | 0.68        | 0.206356718 | 0 |
| WBGene00004906 | snf-7   | ZK1010.9   | 3.647983984 | 0.679285714 | 0.186208524 | 0 |
| WBGene00021880 |         | Y54G2A.15  | 4.369504728 | 0.678571429 | 0.155297104 | 0 |
| WBGene00044529 | irld-1  | D2063.4    | 4.077875807 | 0.678571429 | 0.166403162 | 0 |
| WBGene00012720 |         | Y39E4B.11  | 3.225433428 | 0.675714286 | 0.209495654 | 0 |
| WBGene00009749 |         | F46A8.6    | 3.176446565 | 0.675714286 | 0.212726477 | 0 |
| WBGene00022700 |         | ZK353.4    | 3.455382717 | 0.675       | 0.195347391 | 0 |
| WBGene00012138 |         | T28F4.3    | 3.527965832 | 0.674285714 | 0.19112592  | 0 |
| WBGene00000696 | col-122 | T05A1.2    | 3.455198907 | 0.674285714 | 0.195151056 | 0 |
| WBGene00008651 |         | F10D11.5   | 3.105855891 | 0.674285714 | 0.217101417 | 0 |
| WBGene00018196 | nep-13  | F39E9.4    | 3.257200175 | 0.672857143 | 0.206575312 | 0 |
| WBGene00018165 |         | F38A5.8    | 3.21783625  | 0.672857143 | 0.209102357 | 0 |
| WBGene00007570 |         | C14A6.6    | 3.859194256 | 0.671428571 | 0.173981543 | 0 |
| WBGene00019626 |         | K10C9.7    | 3.788331419 | 0.671428571 | 0.177235964 | 0 |
| WBGene00009075 |         | F23B2.7    | 3.664031378 | 0.671428571 | 0.183248587 | 0 |
| WBGene00006624 | try-6   | F48A9.3    | 3.96900371  | 0.671071429 | 0.169078055 | 0 |
| A_12_P159830   |         |            | 3.898153451 | 0.67        | 0.171876251 | 0 |

|                |          |            |              |              |             |   |
|----------------|----------|------------|--------------|--------------|-------------|---|
| WBGene00012296 | spe-46   | W06D4.2    | 3.91960882   | 0.668571429  | 0.170570957 | 0 |
| A_12_P108193   |          |            | 4.355519616  | 0.667142857  | 0.153171818 | 0 |
| WBGene00010636 |          | K07F5.8    | 3.679096933  | 0.667142857  | 0.181333319 | 0 |
| WBGene00013886 |          | ZC412.5    | 4.789442596  | 0.665714286  | 0.138996193 | 0 |
| WBGene00001839 | hdl-1    | ZK829.2    | 4.352436801  | 0.665714286  | 0.152952085 | 0 |
| A_12_P136854   |          |            | 3.622265263  | 0.665714286  | 0.183783969 | 0 |
| WBGene00050916 |          | F55F10.3   | 3.718734796  | 0.662857143  | 0.178248028 | 0 |
| WBGene00050912 |          | F43E2.12   | 4.346691163  | 0.661428571  | 0.152168292 | 0 |
| A_12_P136851   |          |            | 3.912125456  | 0.661428571  | 0.169071411 | 0 |
| WBGene00021154 |          | Y4C6A.4    | 3.384497801  | 0.660408163  | 0.195127373 | 0 |
| WBGene00012402 | sfxn-1.3 | Y6E2A.9    | 3.781768565  | 0.66         | 0.17452152  | 0 |
| WBGene00022288 |          | Y75B7B.1   | 3.124671776  | 0.66         | 0.211222185 | 0 |
| WBGene00019431 |          | K06A5.3    | 4.425014865  | 0.658571429  | 0.148829201 | 0 |
| WBGene00003839 | ocr-2    | T09A12.3   | 4.176307284  | 0.658571429  | 0.157692283 | 0 |
| WBGene00022761 |          | ZK546.4    | 3.51463121   | 0.657142857  | 0.186973488 | 0 |
| WBGene00013894 |          | ZC434.8    | 3.316761362  | 0.655714286  | 0.197697155 | 0 |
| WBGene00010538 | ttr-3    | K03H1.3    | 3.134865589  | 0.654285714  | 0.208712526 | 0 |
| WBGene00009459 |          | F36A2.12   | 3.736626873  | 0.652857143  | 0.174718313 | 0 |
| WBGene00012120 |          | T28C6.5    | 3.381988484  | 0.651632653  | 0.192677372 | 0 |
| WBGene00011297 |          | R102.10    | 4.020675467  | 0.650238095  | 0.161723596 | 0 |
| WBGene00008493 |          | F01D5.2    | 3.646489305  | 0.65         | 0.178253642 | 0 |
| WBGene00000707 | col-133  | F52B11.4   | 3.139947978  | 0.648571429  | 0.206554832 | 0 |
| WBGene00018147 |          | F37C4.7    | 3.549375195  | 0.647142857  | 0.182325852 | 0 |
| A_12_P136850   |          |            | 3.391992793  | 0.647142857  | 0.190785446 | 0 |
| WBGene00008153 |          | C47E12.10  | 3.342592189  | 0.647142857  | 0.193605089 | 0 |
| WBGene00016177 |          | C28C12.1   | 3.342105101  | 0.645714286  | 0.193205859 | 0 |
| A_12_P136852   |          |            | 3.361957186  | 0.644285714  | 0.191640071 | 0 |
| WBGene00021454 |          | Y39F10A.3  | 3.260349587  | 0.644285714  | 0.197612464 | 0 |
| WBGene00001538 | gcy-12   | F08B1.2    | 3.239884055  | 0.644285714  | 0.198860732 | 0 |
| WBGene00022699 |          | ZK353.3    | 3.546600483  | 0.642285714  | 0.181098976 | 0 |
| WBGene00015685 |          | C10G11.1   | 3.668815029  | 0.641714286  | 0.174910504 | 0 |
| WBGene00017737 |          | F23C8.8    | 4.029384425  | 0.637142857  | 0.158124118 | 0 |
| WBGene00007791 |          | C28A5.6    | 3.856169144  | 0.637142857  | 0.165226896 | 0 |
| WBGene00010682 |          | K08F8.5    | 3.304074058  | 0.637142857  | 0.192835525 | 0 |
| WBGene00019555 |          | K09C6.1    | 3.829148077  | 0.635714286  | 0.166019771 | 0 |
| WBGene00022634 |          | ZC581.7    | 3.517689721  | 0.632857143  | 0.179907039 | 0 |
| WBGene00045484 |          | F34D10.9   | 4.56233889   | 0.631428571  | 0.13840019  | 0 |
| WBGene00011777 |          | T14G10.8   | 4.239683357  | 0.631428571  | 0.148932955 | 0 |
| WBGene00013684 |          | Y105E8A.27 | 3.239544644  | 0.631190476  | 0.194839258 | 0 |
| WBGene00012961 |          | Y47H10A.5  | 3.288409003  | 0.631088435  | 0.191913    | 0 |
| WBGene00012827 |          | Y43F8C.5   | 3.301742461  | 0.63         | 0.190808341 | 0 |
| WBGene00000615 | col-38   | F54C9.4    | 4.004155892  | 0.628571429  | 0.156979759 | 0 |
| WBGene00010712 |          | K09B11.5   | 3.470581091  | 0.623571429  | 0.179673493 | 0 |
| WBGene00019980 | chil-14  | R09B5.12   | 3.90226454   | 0.62         | 0.158882104 | 0 |
| WBGene00018120 |          | F36H12.4   | 3.832719493  | 0.62         | 0.161765034 | 0 |
| WBGene00010155 |          | F56F3.4    | 3.156440015  | 0.62         | 0.196423818 | 0 |
| WBGene00014085 |          | ZK809.1    | 3.099460662  | 0.618571429  | 0.199573892 | 0 |
| WBGene00007446 | mboa-4   | C08F8.4    | 3.168594224  | 0.617142857  | 0.194768662 | 0 |
| WBGene00018065 |          | F35F11.2   | 3.666569349  | 0.615714286  | 0.167926535 | 0 |
| WBGene00044763 |          | ZK688.12   | 3.95177577   | 0.61         | 0.154360985 | 0 |
| WBGene00021010 |          | W03G1.2    | 3.176882414  | 0.608367347  | 0.191498226 | 0 |
| WBGene00044298 |          | T23B7.2    | 3.625092447  | 0.604285714  | 0.166695256 | 0 |
| WBGene00044263 |          | Y105C5A.26 | 3.742736867  | 0.602857143  | 0.161073878 | 0 |
| WBGene00044312 |          | K04C2.8    | 3.216741716  | 0.601428571  | 0.186968251 | 0 |
| WBGene00010991 |          | R03D7.5    | 3.125064489  | 0.6          | 0.191996038 | 0 |
| WBGene00007898 |          | C33D9.3    | -4.197315351 | -0.631836735 | 0.150533539 | 0 |
| WBGene00022485 | fbxa-63  | Y119D3B.7  | -4.46685983  | -0.638571429 | 0.14295757  | 0 |
| WBGene00016996 |          | D1005.2    | -4.36120535  | -0.691428571 | 0.158540705 | 0 |
| WBGene00019426 | cutl-16  | K06A1.3    | -4.354833834 | -0.704       | 0.16165944  | 0 |
| WBGene00045102 |          | F52B11.8   | -5.195783497 | -0.705714286 | 0.135824421 | 0 |
| WBGene00023500 |          | C11H1.9    | -5.559873068 | -0.741428571 | 0.133353507 | 0 |
| WBGene00044660 | fbxa-87  | F44G3.13   | -4.718137882 | -0.746496599 | 0.158218479 | 0 |
| WBGene00020902 | jmjc-1   | T28F2.4    | -5.405434111 | -0.765714286 | 0.141656391 | 0 |
| WBGene00011760 |          | T13H5.6    | -4.489824242 | -0.784285714 | 0.174680716 | 0 |
| WBGene00016659 |          | C45B2.2    | -5.275230585 | -0.785714286 | 0.148944065 | 0 |

|                |           |            |              |              |             |   |
|----------------|-----------|------------|--------------|--------------|-------------|---|
| WBGene00045246 |           | C29E4.15   | -4.422384752 | -0.802857143 | 0.181543938 | 0 |
| WBGene00008971 |           | F20C5.6    | -4.467902096 | -0.821428571 | 0.183851068 | 0 |
| WBGene00013866 | cbs-1     | ZC373.1    | -5.017825616 | -0.822857143 | 0.163986795 | 0 |
| WBGene00020258 |           | T05E7.1    | -4.586196834 | -0.842857143 | 0.183781284 | 0 |
| WBGene00022416 |           | Y102A11A.6 | -4.918641506 | -0.851428571 | 0.173102384 | 0 |
| WBGene00020673 |           | T22B7.4    | -4.289388362 | -0.878571429 | 0.204824407 | 0 |
| WBGene00014254 | cyp-13A10 | ZK1320.4   | -4.945422703 | -0.937142857 | 0.189497018 | 0 |
| WBGene00011437 |           | T04F3.2    | -4.404735138 | -1.134285714 | 0.257515078 | 0 |
| WBGene00013007 |           | Y48E1B.8   | -4.369157492 | -1.472857143 | 0.337103239 | 0 |
