# Supplementary material for: Transcription factors CEP‐1/p53 and CEH‐23 collaborate with AAK‐2/AMPK to modulate longevity in Caenorhabditis elegans
Source: PubMed Central journal article supplement (PMC5506430; doi:10.1111/acel.12619), 2017-05-30
Supplement: ACEL-16-814-s007.pdf [file ACEL-16-814-s007.pdf]

**Table S4: Genes differentially expressed in aak-2ca vs transgenic control (identified by 1 class SAM with FDR=0, 1.5 fold change cutoff)**

| Gene ID        | Gene Name                 | Score(d)    | Numerator(r) | enominator(s+s <sup>2</sup> ) | q-value(%) |
|----------------|---------------------------|-------------|--------------|-------------------------------|------------|
| WBGene00000657 | <a href="#">col-81</a>    | 12.25039704 | 5.572110514  | 0.454851422                   | 0          |
| WBGene00000608 | <a href="#">col-19</a>    | 13.46144529 | 5.364704131  | 0.398523637                   | 0          |
| WBGene00017806 | <a href="#">F26A1.8</a>   | 13.07041312 | 5.156815181  | 0.394541101                   | 0          |
| WBGene00006929 | <a href="#">vit-5</a>     | 17.93614245 | 4.891221059  | 0.272701952                   | 0          |
| WBGene00010065 | <a href="#">F54F7.3</a>   | 20.82933796 | 4.803742219  | 0.230623855                   | 0          |
| WBGene00000703 | <a href="#">col-129</a>   | 12.89518259 | 4.567913511  | 0.354234109                   | 0          |
| WBGene00008681 | <a href="#">scrm-4</a>    | 26.39683083 | 4.525484457  | 0.171440446                   | 0          |
| WBGene00006928 | <a href="#">vit-4</a>     | 16.25202468 | 4.250752213  | 0.261552163                   | 0          |
| WBGene00000712 | <a href="#">col-139</a>   | 9.11342982  | 4.035501893  | 0.442808248                   | 0          |
| WBGene00007823 | <a href="#">C30H6.5</a>   | 12.31739547 | 4.025535198  | 0.326817078                   | 0          |
| WBGene00000024 | <a href="#">abu-1</a>     | 10.81008146 | 3.866165578  | 0.357644444                   | 0          |
| WBGene00006926 | <a href="#">vit-2</a>     | 15.5613926  | 3.67004348   | 0.235842869                   | 0          |
| WBGene00000713 | <a href="#">col-140</a>   | 8.26335824  | 3.626369206  | 0.438849327                   | 0          |
| WBGene00021083 | <a href="#">W08E12.2</a>  | 9.204930611 | 3.551575666  | 0.385834051                   | 0          |
| WBGene00000663 | <a href="#">col-88</a>    | 12.2107401  | 3.502748789  | 0.286858025                   | 0          |
| WBGene00020223 | <a href="#">T05A7.6</a>   | 39.56605307 | 3.486582476  | 0.088120553                   | 0          |
| WBGene00019084 | <a href="#">F59A6.2</a>   | 10.71435746 | 3.407912782  | 0.31806973                    | 0          |
| WBGene00000729 | <a href="#">col-156</a>   | 9.016218921 | 3.351377273  | 0.371705401                   | 0          |
| WBGene00018031 | <a href="#">F35B3.4</a>   | 11.29938811 | 3.32009915   | 0.293829995                   | 0          |
| WBGene00016196 | <a href="#">C28H8.5</a>   | 10.62829108 | 3.300790236  | 0.310566413                   | 0          |
| WBGene00021084 | <a href="#">W08E12.3</a>  | 19.43769244 | 3.291844393  | 0.169353662                   | 0          |
| WBGene00012880 | <a href="#">Y45F10C.4</a> | 16.33975426 | 3.289075778  | 0.201292855                   | 0          |
| WBGene00017743 | <a href="#">F23F1.2</a>   | 9.083536364 | 3.182732404  | 0.350384726                   | 0          |
| WBGene00016434 | <a href="#">C35B1.4</a>   | 12.64249551 | 3.124551819  | 0.247146761                   | 0          |
| WBGene00016596 | <a href="#">C42D4.3</a>   | 12.13020271 | 3.120590286  | 0.257257884                   | 0          |
| WBGene00015987 | <a href="#">C18G1.9</a>   | 11.99930009 | 3.107788259  | 0.258997461                   | 0          |
| WBGene00015690 | <a href="#">C10G11.10</a> | 23.84282219 | 3.102573611  | 0.130126106                   | 0          |
| WBGene00017736 | <a href="#">F23C8.7</a>   | 19.64642934 | 3.091239106  | 0.157343559                   | 0          |
| WBGene00020670 | <a href="#">T22B2.6</a>   | 9.362135979 | 3.077498912  | 0.328717604                   | 0          |
| WBGene00007398 | <a href="#">C07A4.3</a>   | 15.15537403 | 3.061420495  | 0.202002306                   | 0          |
| WBGene00021085 | <a href="#">W08E12.4</a>  | 28.52127935 | 3.055412551  | 0.107127472                   | 0          |
| WBGene00019307 | <a href="#">C17B7.13</a>  | 17.01183763 | 3.052118197  | 0.179411435                   | 0          |
| WBGene00008660 | <a href="#">clec-153</a>  | 14.80472005 | 3.03668572   | 0.205116051                   | 0          |
| WBGene00015331 | <a href="#">C02B10.6</a>  | 30.24875777 | 3.004346107  | 0.099321305                   | 0          |
| WBGene00020413 | <a href="#">T10E9.3</a>   | 13.87157094 | 2.97654929   | 0.214579106                   | 0          |
| WBGene00022530 | <a href="#">ZC155.2</a>   | 24.15526502 | 2.973083238  | 0.123082203                   | 0          |
| WBGene00000694 | <a href="#">col-120</a>   | 12.51960995 | 2.968945632  | 0.237143621                   | 0          |
| WBGene00010084 | <a href="#">F55B11.2</a>  | 11.37369337 | 2.966007631  | 0.260777879                   | 0          |
| WBGene00006930 | <a href="#">vit-6</a>     | 23.03236466 | 2.956383307  | 0.128357785                   | 0          |
| WBGene00004099 | <a href="#">pqn-5</a>     | 8.403443517 | 2.927045994  | 0.348315067                   | 0          |
| WBGene00009115 | <a href="#">F25F2.1</a>   | 24.24579049 | 2.905070196  | 0.119817508                   | 0          |
| WBGene00020533 | <a href="#">T16A1.2</a>   | 17.32738243 | 2.894789348  | 0.167064435                   | 0          |
| WBGene00007354 | <a href="#">C06A1.3</a>   | 25.06085943 | 2.865220219  | 0.114330485                   | 0          |
| WBGene00000710 | <a href="#">col-137</a>   | 9.121274084 | 2.858686382  | 0.31340867                    | 0          |
| WBGene00007305 | <a href="#">C04G2.2</a>   | 29.11351791 | 2.853209051  | 0.098002895                   | 0          |
| WBGene00014187 | <a href="#">ZK1025.7</a>  | 39.61152591 | 2.842922933  | 0.071770094                   | 0          |
| WBGene00010509 | <a href="#">K02E2.8</a>   | 14.97047415 | 2.835508774  | 0.189406745                   | 0          |
| WBGene00020033 | <a href="#">R12E2.7</a>   | 10.06001541 | 2.834625383  | 0.281771475                   | 0          |
| WBGene00017073 | <a href="#">D2096.6</a>   | 11.79877909 | 2.833445294  | 0.24014733                    | 0          |
| WBGene00006927 | <a href="#">vit-3</a>     | 11.51743431 | 2.831116488  | 0.245811386                   | 0          |
| WBGene00000636 | <a href="#">col-60</a>    | 10.40935461 | 2.820486967  | 0.270956949                   | 0          |
| WBGene00018783 | <a href="#">F54A3.4</a>   | 21.17160199 | 2.79123503   | 0.131838631                   | 0          |
| WBGene00002204 | <a href="#">kin-21</a>    | 41.64440459 | 2.78209449   | 0.066805962                   | 0          |
| WBGene00012115 | <a href="#">T28B8.4</a>   | 25.51218402 | 2.779777296  | 0.108958813                   | 0          |
| WBGene00022689 | <a href="#">math-47</a>   | 30.75046029 | 2.779361841  | 0.090384398                   | 0          |

|                |                            |             |             |             |   |
|----------------|----------------------------|-------------|-------------|-------------|---|
| WBGene00016327 | <a href="#">C32E12.1</a>   | 43.63611005 | 2.775117823 | 0.06359682  | 0 |
| WBGene00017213 | <a href="#">F07E5.8</a>    | 20.7501438  | 2.76720875  | 0.133358534 | 0 |
| WBGene00000034 | <a href="#">abu-11</a>     | 9.315170429 | 2.724962049 | 0.292529489 | 0 |
| WBGene00013644 | <a href="#">Y105C5A.25</a> | 18.90579122 | 2.716869618 | 0.143705682 | 0 |
| WBGene00018999 | <a href="#">F57B9.8</a>    | 26.79420249 | 2.700253634 | 0.100777533 | 0 |
| WBGene00022596 | <a href="#">ZC395.4</a>    | 17.97315333 | 2.69443636  | 0.149914504 | 0 |
| WBGene00017672 | <a href="#">F21F3.2</a>    | 18.51445064 | 2.689570979 | 0.145268743 | 0 |
| WBGene00000680 | <a href="#">col-106</a>    | 8.636284742 | 2.68481364  | 0.310875998 | 0 |
| WBGene00009324 | <a href="#">F32B6.10</a>   | 28.23606265 | 2.676913401 | 0.094804769 | 0 |
| WBGene00001703 | <a href="#">grd-14</a>     | 15.75717828 | 2.669118366 | 0.169390631 | 0 |
| WBGene00016636 | <a href="#">C44B12.1</a>   | 10.3939906  | 2.645108063 | 0.254484362 | 0 |
| WBGene00007179 | <a href="#">B0457.4</a>    | 15.12512783 | 2.635409866 | 0.174240502 | 0 |
| WBGene00021639 | <a href="#">Y47G6A.13</a>  | 14.30169036 | 2.635043216 | 0.184246977 | 0 |
| WBGene00016638 | <a href="#">C44B12.5</a>   | 11.31112966 | 2.62703676  | 0.232252378 | 0 |
| WBGene00022707 | <a href="#">ZK354.6</a>    | 18.14755875 | 2.624375377 | 0.144613136 | 0 |
| WBGene00012547 | <a href="#">Y37D8A.5</a>   | 40.95709825 | 2.620655609 | 0.063985383 | 0 |
| WBGene00008590 | <a href="#">F08H9.2</a>    | 16.41211088 | 2.608802201 | 0.158955921 | 0 |
| WBGene00021625 | <a href="#">Y47D7A.13</a>  | 11.0855922  | 2.605678442 | 0.235050902 | 0 |
| WBGene00010634 | <a href="#">K07F5.6</a>    | 21.37678063 | 2.597262209 | 0.121499222 | 0 |
| WBGene00014183 | <a href="#">ZK1025.3</a>   | 14.68617592 | 2.584567245 | 0.175986401 | 0 |
| WBGene00006047 | <a href="#">ssp-19</a>     | 12.23916884 | 2.578368307 | 0.210665311 | 0 |
| WBGene00006044 | <a href="#">ssp-16</a>     | 18.67662378 | 2.568480663 | 0.137523821 | 0 |
| WBGene00012138 | <a href="#">T28F4.3</a>    | 10.56934708 | 2.557620824 | 0.241984751 | 0 |
| WBGene00015049 | <a href="#">B0218.5</a>    | 10.61101688 | 2.555840093 | 0.24086665  | 0 |
| WBGene00012102 | <a href="#">T27F6.1</a>    | 11.4084221  | 2.551429579 | 0.223644388 | 0 |
| WBGene00019409 | <a href="#">K05F1.8</a>    | 18.7350543  | 2.546631092 | 0.135928674 | 0 |
| WBGene00018123 | <a href="#">F36H12.9</a>   | 11.13729144 | 2.537478197 | 0.227836203 | 0 |
| WBGene00009549 | <a href="#">F38H4.5</a>    | 15.90371581 | 2.529977762 | 0.159080921 | 0 |
| WBGene00019717 | <a href="#">M01H9.1</a>    | 11.99462158 | 2.521827617 | 0.210246534 | 0 |
| WBGene00022108 | <a href="#">Y71F9AL.2</a>  | 18.53031956 | 2.521043037 | 0.136049626 | 0 |
| WBGene00011200 | <a href="#">R10E4.3</a>    | 18.55920235 | 2.513206047 | 0.135415628 | 0 |
| WBGene00008125 | <a href="#">C47A4.5</a>    | 19.48642343 | 2.502990028 | 0.128447893 | 0 |
| WBGene00015241 | <a href="#">B0524.2</a>    | 9.251129662 | 2.502743549 | 0.270533831 | 0 |
| WBGene00018178 | <a href="#">F38E1.3</a>    | 17.77625613 | 2.500425007 | 0.140660946 | 0 |
| WBGene00013437 | <a href="#">Y66D12A.11</a> | 8.787658581 | 2.49518294  | 0.283941725 | 0 |
| WBGene00016085 | <a href="#">C25A8.5</a>    | 10.42266185 | 2.494325049 | 0.239317468 | 0 |
| WBGene00022679 | <a href="#">ZK180.5</a>    | 10.32945585 | 2.492795591 | 0.241328839 | 0 |
| WBGene00000754 | <a href="#">col-181</a>    | 8.965814825 | 2.490878289 | 0.277819511 | 0 |
| WBGene00000696 | <a href="#">col-122</a>    | 9.47032752  | 2.474326187 | 0.261271448 | 0 |
| WBGene00021007 | <a href="#">W03F11.4</a>   | 29.10267311 | 2.472988509 | 0.084974617 | 0 |
| WBGene00009185 | <a href="#">F27C8.5</a>    | 13.25951    | 2.472166902 | 0.186444816 | 0 |
| WBGene00021993 | <a href="#">Y59E9AL.2</a>  | 18.76106336 | 2.471231302 | 0.131721281 | 0 |
| WBGene00010486 | <a href="#">K01H12.4</a>   | 11.54748762 | 2.446905649 | 0.211899396 | 0 |
| WBGene00020580 | <a href="#">T19D12.5</a>   | 26.37660301 | 2.433543572 | 0.092261447 | 0 |
| WBGene00011910 | <a href="#">T22B3.2</a>    | 17.38926119 | 2.430246847 | 0.139755612 | 0 |
| WBGene00019216 | <a href="#">H20J04.1</a>   | 20.39190458 | 2.422965553 | 0.118819973 | 0 |
| WBGene00012689 | <a href="#">Y39B6A.30</a>  | 14.46644123 | 2.421473952 | 0.1673856   | 0 |
| WBGene00001736 | <a href="#">grl-27</a>     | 9.284661895 | 2.417215927 | 0.260345067 | 0 |
| WBGene00010014 | <a href="#">F54B3.2</a>    | 16.65471388 | 2.416501977 | 0.145094175 | 0 |
| WBGene00009149 | <a href="#">F26D2.10</a>   | 10.42749417 | 2.410926184 | 0.231208586 | 0 |
| WBGene00006954 | <a href="#">wrt-8</a>      | 10.07817008 | 2.409506889 | 0.239081785 | 0 |
| WBGene00009492 | <a href="#">F36H1.3</a>    | 12.23597955 | 2.406809092 | 0.196699339 | 0 |
| WBGene00010092 | <a href="#">F55C5.2</a>    | 11.89021413 | 2.40504728  | 0.202271149 | 0 |
| WBGene00018004 | <a href="#">F33D11.7</a>   | 8.475221111 | 2.404553704 | 0.283715749 | 0 |
| WBGene00009401 | <a href="#">F35C11.2</a>   | 16.27248586 | 2.400666489 | 0.14752918  | 0 |
| WBGene00012827 | <a href="#">Y43F8C.5</a>   | 17.67677271 | 2.400090634 | 0.135776517 | 0 |
| WBGene00010679 | <a href="#">K08F4.5</a>    | 23.35850666 | 2.396446343 | 0.102594159 | 0 |

|                |                           |             |             |             |   |
|----------------|---------------------------|-------------|-------------|-------------|---|
| WBGene00021207 | <a href="#">Y18H1A.1</a>  | 14.86946634 | 2.395441214 | 0.161097995 | 0 |
|                | <a href="#">yk582c5</a>   | 9.459637642 | 2.394951829 | 0.253175853 | 0 |
| WBGene00006048 | <a href="#">ssp-31</a>    | 11.10641651 | 2.38577467  | 0.214810481 | 0 |
| WBGene00013526 | <a href="#">Y73F8A.20</a> | 44.35143652 | 2.381129936 | 0.053687775 | 0 |
| WBGene00010510 | <a href="#">ent-3</a>     | 23.41432318 | 2.376778334 | 0.10150959  | 0 |
| WBGene00011171 | <a href="#">C17G10.3</a>  | 12.68506616 | 2.374083537 | 0.187155787 | 0 |
| WBGene00018001 | <a href="#">F33D11.2</a>  | 20.95354647 | 2.364380575 | 0.11283916  | 0 |
| WBGene00008001 | <a href="#">C38C10.3</a>  | 21.73468337 | 2.35534564  | 0.108368068 | 0 |
| WBGene00018563 | <a href="#">F47D12.7</a>  | 27.12969188 | 2.35406411  | 0.086770765 | 0 |
| WBGene00003497 | <a href="#">mup-4</a>     | 8.258437748 | 2.353198132 | 0.284944708 | 0 |
| WBGene00009897 | <a href="#">F49E12.1</a>  | 20.24196849 | 2.349573174 | 0.116074342 | 0 |
| WBGene00018573 | <a href="#">oac-30</a>    | 9.107594601 | 2.347161251 | 0.257714726 | 0 |
| WBGene00009075 | <a href="#">F23B2.7</a>   | 21.43903085 | 2.345260801 | 0.109392109 | 0 |
| WBGene00018347 | <a href="#">F42C5.5</a>   | 8.516367133 | 2.340870031 | 0.274867205 | 0 |
| WBGene00016130 | <a href="#">C26B2.8</a>   | 9.680115792 | 2.340458212 | 0.241779981 | 0 |
| WBGene00016416 | <a href="#">C34F11.5</a>  | 9.656631727 | 2.337756974 | 0.242088239 | 0 |
| WBGene00011260 | <a href="#">R13G10.4</a>  | 14.69119426 | 2.336593265 | 0.159047197 | 0 |
| WBGene00013858 | <a href="#">ZC168.6</a>   | 20.62740565 | 2.323768205 | 0.11265441  | 0 |
| WBGene00007230 | <a href="#">C01G10.1</a>  | 14.36376041 | 2.3174747   | 0.161341782 | 0 |
| WBGene00011530 | <a href="#">T06D8.10</a>  | 12.73913818 | 2.316486185 | 0.181840102 | 0 |
| WBGene00019812 | <a href="#">R01H2.4</a>   | 12.68995132 | 2.315355404 | 0.182455814 | 0 |
| WBGene00019086 | <a href="#">F59A6.4</a>   | 9.176266521 | 2.31437405  | 0.252213037 | 0 |
| WBGene00013712 | <a href="#">dlc-6</a>     | 15.24233483 | 2.314189706 | 0.151826458 | 0 |
| WBGene00010366 | <a href="#">H05L14.1</a>  | 14.92110984 | 2.312723004 | 0.154996715 | 0 |
| WBGene00007049 | <a href="#">tag-191</a>   | 10.65805979 | 2.31057087  | 0.216790947 | 0 |
| WBGene00000757 | <a href="#">col-184</a>   | 8.172799375 | 2.303135132 | 0.281804927 | 0 |
| WBGene00017393 | <a href="#">F12A10.4</a>  | 26.72390802 | 2.300919079 | 0.086099648 | 0 |
| WBGene00003562 | <a href="#">ncr-2</a>     | 24.35139357 | 2.299632487 | 0.094433535 | 0 |
| WBGene00016953 | <a href="#">C55C3.3</a>   | 16.98145321 | 2.298054811 | 0.135327335 | 0 |
| WBGene00014154 | <a href="#">ZK930.4</a>   | 17.64252341 | 2.286062455 | 0.129576841 | 0 |
| WBGene00022771 | <a href="#">ZK616.1</a>   | 21.57940654 | 2.279791952 | 0.105646647 | 0 |
| WBGene00017441 | <a href="#">F13H8.8</a>   | 15.75262354 | 2.278763543 | 0.144659303 | 0 |
| WBGene00007597 | <a href="#">C15A11.2</a>  | 9.3038511   | 2.272738715 | 0.244279352 | 0 |
| WBGene00015929 | <a href="#">C17H12.3</a>  | 10.91505064 | 2.270745963 | 0.20803806  | 0 |
| WBGene00007806 | <a href="#">clec-230</a>  | 14.53062504 | 2.269542723 | 0.156190303 | 0 |
| WBGene00006449 | <a href="#">tag-76</a>    | 46.44112248 | 2.260984398 | 0.048684964 | 0 |
| WBGene00014201 | <a href="#">ZK1053.6</a>  | 22.04054097 | 2.260833203 | 0.102576121 | 0 |
| WBGene00008950 | <a href="#">wht-5</a>     | 16.93446877 | 2.245995252 | 0.132628622 | 0 |
| WBGene00010254 | <a href="#">F58E6.5</a>   | 16.38182945 | 2.236926767 | 0.136549265 | 0 |
| WBGene00010906 | <a href="#">M88.3</a>     | 31.98843536 | 2.236788859 | 0.069924922 | 0 |
| WBGene00015034 | <a href="#">B0207.11</a>  | 14.64423938 | 2.233614655 | 0.15252514  | 0 |
| WBGene00021878 | <a href="#">Y54G2A.13</a> | 13.39531659 | 2.231211367 | 0.166566527 | 0 |
| WBGene00018531 | <a href="#">F47B3.7</a>   | 12.98581143 | 2.230141195 | 0.171736761 | 0 |
| WBGene00011790 | <a href="#">T15H9.5</a>   | 18.46771672 | 2.218217637 | 0.120113259 | 0 |
| WBGene00007639 | <a href="#">C17D12.5</a>  | 18.45707157 | 2.214760516 | 0.119995228 | 0 |
| WBGene00009129 | <a href="#">F25H5.7</a>   | 16.31079826 | 2.204724194 | 0.135169607 | 0 |
| WBGene00018196 | <a href="#">F39E9.4</a>   | 12.47123463 | 2.200752145 | 0.176466261 | 0 |
| WBGene00017050 | <a href="#">D2024.1</a>   | 19.131586   | 2.198040548 | 0.11489066  | 0 |
| WBGene00016698 | <a href="#">C46A5.1</a>   | 13.59617507 | 2.194543688 | 0.161408902 | 0 |
| WBGene00013053 | <a href="#">Y50E8A.10</a> | 13.19097419 | 2.191849435 | 0.166162817 | 0 |
| WBGene00016963 | <a href="#">C56C10.6</a>  | 16.78622447 | 2.191389549 | 0.130546899 | 0 |
| WBGene00020039 | <a href="#">R12E2.14</a>  | 13.85879289 | 2.190341338 | 0.15804705  | 0 |
| WBGene00014179 | <a href="#">ZK1010.5</a>  | 15.90295343 | 2.186120864 | 0.137466344 | 0 |
| WBGene00015765 | <a href="#">C14C11.1</a>  | 9.741866137 | 2.176193582 | 0.2233857   | 0 |
| WBGene00016054 | <a href="#">C24D10.2</a>  | 12.11467906 | 2.171975167 | 0.179284582 | 0 |
| WBGene00017542 | <a href="#">F17E9.5</a>   | 10.20954639 | 2.166318591 | 0.212185587 | 0 |
| WBGene00017354 | <a href="#">F10E9.2</a>   | 14.70815724 | 2.165607112 | 0.147238507 | 0 |

|                |                           |             |             |             |   |
|----------------|---------------------------|-------------|-------------|-------------|---|
| WBGene00017815 | <a href="#">F26B1.1</a>   | 28.67709058 | 2.156738087 | 0.075207702 | 0 |
| WBGene00012011 | <a href="#">T25B9.5</a>   | 22.24678715 | 2.15277361  | 0.096767843 | 0 |
| WBGene00015500 | <a href="#">C06A5.2</a>   | 14.57573199 | 2.148579267 | 0.147407984 | 0 |
| WBGene00016752 | <a href="#">C48E7.7</a>   | 16.99297063 | 2.144206083 | 0.126181945 | 0 |
| WBGene00010920 | <a href="#">M117.4</a>    | 9.594150713 | 2.1432386   | 0.223390133 | 0 |
| WBGene00020686 | <a href="#">T22D1.8</a>   | 13.135702   | 2.136664316 | 0.16266084  | 0 |
| WBGene00012679 | <a href="#">Y39B6A.18</a> | 15.08586493 | 2.136434413 | 0.141618291 | 0 |
| WBGene00007489 | <a href="#">C09G5.7</a>   | 25.55793412 | 2.13505199  | 0.083537737 | 0 |
| WBGene00016954 | <a href="#">C55C3.4</a>   | 14.93896591 | 2.134496385 | 0.142881134 | 0 |
| WBGene00010467 | <a href="#">K01D12.8</a>  | 9.473388034 | 2.129479472 | 0.224785416 | 0 |
| WBGene00018528 | <a href="#">F47B3.4</a>   | 14.77525798 | 2.12806429  | 0.144028909 | 0 |
| WBGene00015215 | <a href="#">B0496.6</a>   | 24.82140493 | 2.125300659 | 0.085623705 | 0 |
| WBGene00009160 | <a href="#">F26E4.5</a>   | 12.15166447 | 2.121191876 | 0.17455978  | 0 |
| WBGene00012172 | <a href="#">W01B6.5</a>   | 9.362702863 | 2.121027777 | 0.226540114 | 0 |
| WBGene00013085 | <a href="#">Y51B9A.3</a>  | 18.45229903 | 2.117373285 | 0.114748481 | 0 |
| WBGene00008124 | <a href="#">C47A4.3</a>   | 20.49597937 | 2.116591577 | 0.103268624 | 0 |
| WBGene00012871 | <a href="#">Y45F10B.3</a> | 15.30624719 | 2.115120595 | 0.138186753 | 0 |
| WBGene00014116 | <a href="#">ZK858.2</a>   | 30.53771206 | 2.109368221 | 0.069074206 | 0 |
| WBGene00007610 | <a href="#">C15H7.3</a>   | 12.18101432 | 2.108083622 | 0.173063061 | 0 |
| WBGene00011501 | <a href="#">rmd-1</a>     | 14.04660445 | 2.107411722 | 0.150029976 | 0 |
| WBGene00022229 | <a href="#">Y73B6A.2</a>  | 14.1201622  | 2.10735543  | 0.149244421 | 0 |
| WBGene00016053 | <a href="#">C24D10.1</a>  | 14.16605713 | 2.105840318 | 0.148653948 | 0 |
| WBGene00008312 | <a href="#">C54G4.2</a>   | 15.11573182 | 2.105124685 | 0.139267136 | 0 |
| WBGene00010468 | <a href="#">K01D12.9</a>  | 12.7652674  | 2.104329387 | 0.164848046 | 0 |
| WBGene00017802 | <a href="#">F26A1.3</a>   | 8.647502987 | 2.104118643 | 0.24332095  | 0 |
| WBGene00009031 | <a href="#">F21H7.5</a>   | 29.78160814 | 2.103879913 | 0.070643597 | 0 |
| WBGene00017804 | <a href="#">F26A1.6</a>   | 16.69999129 | 2.100503211 | 0.125778701 | 0 |
| WBGene00022730 | <a href="#">ZK402.3</a>   | 23.07679155 | 2.099742657 | 0.090989367 | 0 |
| WBGene00020040 | <a href="#">R12E2.15</a>  | 10.52989042 | 2.099304983 | 0.199366271 | 0 |
| WBGene00007381 | <a href="#">C06C6.7</a>   | 12.87065024 | 2.089428434 | 0.16234055  | 0 |
| WBGene00018630 | <a href="#">F49D11.6</a>  | 9.024993635 | 2.088953826 | 0.231463191 | 0 |
| WBGene00007306 | <a href="#">C04G2.5</a>   | 21.20190382 | 2.087678189 | 0.098466544 | 0 |
| WBGene00009471 | <a href="#">F36D3.5</a>   | 13.67441992 | 2.080558908 | 0.152149701 | 0 |
| WBGene00022632 | <a href="#">ZC581.2</a>   | 9.839269214 | 2.079891797 | 0.211386817 | 0 |
| WBGene00004901 | <a href="#">snf-2</a>     | 15.31306431 | 2.072741757 | 0.135357739 | 0 |
| WBGene00022654 | <a href="#">ZK105.3</a>   | 8.176033679 | 2.072347013 | 0.253466056 | 0 |
| WBGene00011134 | <a href="#">R08A2.3</a>   | 16.33796746 | 2.069839628 | 0.126688931 | 0 |
| WBGene00019997 | <a href="#">R10F2.6</a>   | 13.98167322 | 2.069689174 | 0.148028719 | 0 |
| WBGene00044475 | <a href="#">F56D6.13</a>  | 16.95553658 | 2.0694379   | 0.122050865 | 0 |
| WBGene00018870 | <a href="#">F55C12.2</a>  | 24.7011973  | 2.068089475 | 0.08372426  | 0 |
| WBGene00019586 | <a href="#">K09F6.3</a>   | 8.491266191 | 2.067524498 | 0.243488362 | 0 |
| WBGene00007767 | <a href="#">C27C7.2</a>   | 14.31254938 | 2.064925364 | 0.144273763 | 0 |
| WBGene00011191 | <a href="#">R10D12.10</a> | 9.972661508 | 2.055921876 | 0.206155786 | 0 |
| WBGene00016389 | <a href="#">C34B2.4</a>   | 16.89724839 | 2.055486493 | 0.121646226 | 0 |
| WBGene00018525 | <a href="#">F47B3.1</a>   | 20.32427972 | 2.05440013  | 0.101081079 | 0 |
| WBGene00015944 | <a href="#">C18A3.7</a>   | 12.19871417 | 2.050486631 | 0.168090391 | 0 |
| WBGene00012219 | <a href="#">W03C9.1</a>   | 16.8151687  | 2.049369591 | 0.121876243 | 0 |
| WBGene00020766 | <a href="#">T24C12.4</a>  | 9.853667762 | 2.042979299 | 0.207331863 | 0 |
| WBGene00007740 | <a href="#">C26C6.6</a>   | 10.08930441 | 2.041414549 | 0.202334518 | 0 |
| WBGene00017384 | <a href="#">F11G11.4</a>  | 14.32295392 | 2.040781279 | 0.142483268 | 0 |
| WBGene00014062 | <a href="#">ZK673.6</a>   | 11.79091324 | 2.039527872 | 0.172974547 | 0 |
| WBGene00012925 | <a href="#">wht-8</a>     | 15.7387606  | 2.039426541 | 0.129579869 | 0 |
| WBGene00002193 | <a href="#">kin-5</a>     | 12.97697589 | 2.038337334 | 0.15707337  | 0 |
| WBGene00015689 | <a href="#">C10G11.9</a>  | 12.83329894 | 2.037532303 | 0.158769176 | 0 |
| WBGene00006719 | <a href="#">ubc-24</a>    | 13.04917733 | 2.036151752 | 0.156036791 | 0 |
| WBGene00018336 | <a href="#">F42A9.7</a>   | 21.23000292 | 2.034252753 | 0.095819711 | 0 |
| WBGene00022777 | <a href="#">ZK616.7</a>   | 11.27257784 | 2.031158031 | 0.180185762 | 0 |

|                |                           |             |             |             |   |
|----------------|---------------------------|-------------|-------------|-------------|---|
| WBGene00020653 | <a href="#">T21E3.2</a>   | 11.42114555 | 2.024022082 | 0.177217082 | 0 |
| WBGene00011039 | <a href="#">R05H5.4</a>   | 13.90839914 | 2.023747145 | 0.145505397 | 0 |
| WBGene00001387 | <a href="#">far-3</a>     | 10.90831977 | 2.016687214 | 0.184876063 | 0 |
| WBGene00004906 | <a href="#">snf-7</a>     | 21.69919606 | 2.014432376 | 0.092834424 | 0 |
| WBGene00011322 | <a href="#">T01C3.5</a>   | 19.25676704 | 2.014300639 | 0.104602223 | 0 |
| WBGene00005012 | <a href="#">F26F4.2</a>   | 14.12248228 | 2.011613229 | 0.142440485 | 0 |
| WBGene00014168 | <a href="#">ZK945.6</a>   | 22.93203009 | 2.00893347  | 0.087603821 | 0 |
| WBGene00012010 | <a href="#">T25B9.4</a>   | 13.78212254 | 2.001232506 | 0.145204957 | 0 |
| WBGene00010072 | <a href="#">F54F12.1</a>  | 16.22011669 | 2.000821945 | 0.12335435  | 0 |
| WBGene00010373 | <a href="#">H08M01.1</a>  | 17.18428684 | 1.996107514 | 0.11615888  | 0 |
| WBGene00018526 | <a href="#">F47B3.2</a>   | 15.85198399 | 1.991164665 | 0.125609808 | 0 |
| WBGene00022102 | <a href="#">Y69F12A.1</a> | 8.921379403 | 1.991036825 | 0.223175894 | 0 |
| WBGene00018605 | <a href="#">F48E3.4</a>   | 22.88131676 | 1.990357317 | 0.086986135 | 0 |
| WBGene00003887 | <a href="#">osm-7</a>     | 10.09545099 | 1.990051193 | 0.197123556 | 0 |
| WBGene00014007 | <a href="#">ZK596.2</a>   | 8.595254899 | 1.988350377 | 0.231331171 | 0 |
| WBGene00016382 | <a href="#">C33H5.16</a>  | 14.94098206 | 1.985210456 | 0.132870145 | 0 |
| WBGene00011491 | <a href="#">T05F1.5</a>   | 11.66671188 | 1.98481619  | 0.170126443 | 0 |
| WBGene00009028 | <a href="#">F21H7.2</a>   | 22.2543172  | 1.981918463 | 0.089057707 | 0 |
| WBGene00014182 | <a href="#">ZK1025.2</a>  | 14.44163432 | 1.974164049 | 0.13669949  | 0 |
| WBGene00007512 | <a href="#">C10C6.3</a>   | 12.58550611 | 1.972814189 | 0.156752869 | 0 |
| WBGene00016010 | <a href="#">C23G10.1</a>  | 8.763137058 | 1.971476844 | 0.224973869 | 0 |
| WBGene00020074 | <a href="#">R52.2</a>     | 39.23163505 | 1.967828219 | 0.05015922  | 0 |
| WBGene00017955 | <a href="#">F31E8.5</a>   | 9.973515573 | 1.963773803 | 0.196898856 | 0 |
| WBGene00013304 | <a href="#">Y57G11C.6</a> | 13.97936608 | 1.96167229  | 0.140326269 | 0 |
| WBGene00016765 | <a href="#">C49C8.1</a>   | 11.16689924 | 1.960602491 | 0.175572686 | 0 |
| WBGene00013586 | <a href="#">Y80D3A.8</a>  | 13.21533679 | 1.955670359 | 0.147984905 | 0 |
| WBGene00016843 | <a href="#">C50F7.3</a>   | 9.489707087 | 1.945754282 | 0.205038392 | 0 |
| WBGene00000734 | <a href="#">col-161</a>   | 11.3779762  | 1.945352557 | 0.17097527  | 0 |
| WBGene00006661 | <a href="#">C27F2.6</a>   | 8.732905541 | 1.94389657  | 0.22259448  | 0 |
| WBGene00000771 | <a href="#">cpb-2</a>     | 35.63500224 | 1.942115942 | 0.054500233 | 0 |
| WBGene00012345 | <a href="#">W08E3.4</a>   | 12.80065199 | 1.941272705 | 0.151654205 | 0 |
| WBGene00002227 | <a href="#">klp-17</a>    | 9.350473683 | 1.941045988 | 0.207587985 | 0 |
| WBGene00009143 | <a href="#">F26A3.5</a>   | 12.02270592 | 1.940961317 | 0.161441304 | 0 |
| WBGene00018980 | <a href="#">F56F4.3</a>   | 12.43804215 | 1.940155546 | 0.155985606 | 0 |
| WBGene00007777 | <a href="#">C27D8.1</a>   | 15.82258901 | 1.939682961 | 0.12258948  | 0 |
| WBGene00021579 | <a href="#">clec-73</a>   | 11.45649667 | 1.939234796 | 0.169269442 | 0 |
| WBGene00017305 | <a href="#">nspb-12</a>   | 9.547526469 | 1.937654156 | 0.202948288 | 0 |
| WBGene00007082 | <a href="#">AH10.1</a>    | 19.24732211 | 1.936622264 | 0.100617751 | 0 |
| WBGene00010992 | <a href="#">R03D7.8</a>   | 16.73576743 | 1.928163753 | 0.11521215  | 0 |
| WBGene00010265 | <a href="#">F58G1.3</a>   | 14.58653942 | 1.928047041 | 0.132179881 | 0 |
| WBGene00012711 | <a href="#">Y39E4A.1</a>  | 13.11051064 | 1.926735983 | 0.14696117  | 0 |
| WBGene00001725 | <a href="#">grl-16</a>    | 10.3520319  | 1.926235703 | 0.1860732   | 0 |
| WBGene00015994 | <a href="#">C18H7.4</a>   | 36.76370013 | 1.925568812 | 0.052376905 | 0 |
| WBGene00007699 | <a href="#">C24H11.1</a>  | 25.40659615 | 1.923190754 | 0.075696514 | 0 |
| WBGene00000732 | <a href="#">col-159</a>   | 8.738501376 | 1.92298094  | 0.220058435 | 0 |
| WBGene00019561 | <a href="#">K09C6.7</a>   | 13.0265786  | 1.916258822 | 0.14710377  | 0 |
| WBGene00007307 | <a href="#">C04G2.8</a>   | 16.09854883 | 1.91235913  | 0.118790777 | 0 |
| WBGene00020713 | <a href="#">T23B3.5</a>   | 11.63069984 | 1.910194858 | 0.16423731  | 0 |
| WBGene00006039 | <a href="#">ssp-10</a>    | 11.17487405 | 1.90960389  | 0.170883706 | 0 |
| WBGene00022700 | <a href="#">ZK353.4</a>   | 24.36944188 | 1.905264569 | 0.078182528 | 0 |
| WBGene00013771 | <a href="#">Y113G7C.1</a> | 10.45635969 | 1.904980716 | 0.182183931 | 0 |
| WBGene00018548 | <a href="#">clec-73</a>   | 15.94104578 | 1.904572551 | 0.11947601  | 0 |
| WBGene00016440 | <a href="#">C35D10.2</a>  | 9.129790148 | 1.903090283 | 0.208448415 | 0 |
| WBGene00013978 | <a href="#">ZK507.1</a>   | 11.27904344 | 1.902328363 | 0.168660434 | 0 |
| WBGene00007986 | <a href="#">C36F7.5</a>   | 14.75541566 | 1.900746072 | 0.128816844 | 0 |
| WBGene00007081 | <a href="#">AH6.3</a>     | 14.58990186 | 1.900357667 | 0.130251573 | 0 |
| WBGene00004909 | <a href="#">snf-10</a>    | 21.8155547  | 1.900196637 | 0.087102834 | 0 |

|                |                            |             |             |             |   |
|----------------|----------------------------|-------------|-------------|-------------|---|
| WBGene00015192 | <a href="#">B0432.11</a>   | 21.6179855  | 1.899493963 | 0.087866372 | 0 |
| WBGene00020187 | <a href="#">gsp-4</a>      | 12.82998414 | 1.897912193 | 0.147927867 | 0 |
| WBGene00015931 | <a href="#">C17H12.5</a>   | 9.894268966 | 1.893998915 | 0.191423835 | 0 |
| WBGene00008141 | <a href="#">C47E8.1</a>    | 19.93037432 | 1.893964606 | 0.095029053 | 0 |
| WBGene00015629 | <a href="#">C09B9.4</a>    | 24.49102756 | 1.892027702 | 0.077253913 | 0 |
| WBGene00010563 | <a href="#">K04G2.4</a>    | 17.67399387 | 1.890054708 | 0.106939876 | 0 |
| WBGene00013979 | <a href="#">ZK507.3</a>    | 16.42373277 | 1.889822103 | 0.11506654  | 0 |
| WBGene00009457 | <a href="#">F36A2.10</a>   | 27.6917716  | 1.882274781 | 0.06797235  | 0 |
| WBGene00012008 | <a href="#">T25B9.2</a>    | 10.28873656 | 1.877441908 | 0.182475457 | 0 |
| WBGene00019810 | <a href="#">R01H2.2</a>    | 13.48851332 | 1.875216756 | 0.139023235 | 0 |
| WBGene00004962 | <a href="#">spe-8</a>      | 11.94511576 | 1.874532204 | 0.15692876  | 0 |
| WBGene00014238 | <a href="#">ZK1225.4</a>   | 12.06325283 | 1.870581416 | 0.155064429 | 0 |
| WBGene00009250 | <a href="#">F29D10.1</a>   | 21.89108847 | 1.869858928 | 0.085416444 | 0 |
| WBGene00015026 | <a href="#">B0207.1</a>    | 8.843269081 | 1.868838915 | 0.211328966 | 0 |
| WBGene00009502 | <a href="#">F37A8.2</a>    | 11.48895457 | 1.868323733 | 0.162619124 | 0 |
| WBGene00022753 | <a href="#">ZK484.7</a>    | 10.66115641 | 1.86517281  | 0.174950328 | 0 |
| WBGene00022243 | <a href="#">Y73B6BL.22</a> | 8.129341106 | 1.864812619 | 0.229392837 | 0 |
| WBGene00003664 | <a href="#">nhr-244</a>    | 12.41099711 | 1.863987283 | 0.150188359 | 0 |
| WBGene00013999 | <a href="#">ZK550.5</a>    | 11.41268414 | 1.859931838 | 0.162970587 | 0 |
| WBGene00007977 | <a href="#">gska-3</a>     | 12.17554033 | 1.859830283 | 0.152751355 | 0 |
| WBGene00008272 | <a href="#">C53B4.2</a>    | 8.130938573 | 1.859626956 | 0.228709999 | 0 |
| WBGene00009344 | <a href="#">F32H2.7</a>    | 13.55282342 | 1.856871124 | 0.137009911 | 0 |
| WBGene00010612 | <a href="#">K07A1.5</a>    | 14.94393616 | 1.853869065 | 0.124054937 | 0 |
| WBGene00021006 | <a href="#">dct-9</a>      | 9.793730089 | 1.853649494 | 0.189268999 | 0 |
| WBGene00012831 | <a href="#">Y43F8C.9</a>   | 8.417173276 | 1.842867115 | 0.21894133  | 0 |
| WBGene00018120 | <a href="#">F36H12.4</a>   | 14.53953356 | 1.842658648 | 0.126734371 | 0 |
| WBGene00016357 | <a href="#">C33F10.11</a>  | 19.28127627 | 1.842405049 | 0.095554102 | 0 |
| WBGene00018119 | <a href="#">F36H12.3</a>   | 10.61724595 | 1.840793755 | 0.173377707 | 0 |
| WBGene00009643 | <a href="#">F42G4.6</a>    | 13.66849657 | 1.840286153 | 0.134637057 | 0 |
| WBGene00002208 | <a href="#">kin-26</a>     | 25.13080076 | 1.837490079 | 0.073117053 | 0 |
| WBGene00007300 | <a href="#">C04F12.6</a>   | 12.59238986 | 1.837049792 | 0.145885715 | 0 |
| WBGene00017902 | <a href="#">F28E10.4</a>   | 9.067279597 | 1.833969274 | 0.202262349 | 0 |
| WBGene00006056 | <a href="#">sss-1</a>      | 11.36749191 | 1.832781971 | 0.16123011  | 0 |
| WBGene00010728 | <a href="#">K09G1.2</a>    | 13.20930206 | 1.83182901  | 0.138677199 | 0 |
| WBGene00014197 | <a href="#">ZK1053.2</a>   | 14.66063315 | 1.829823602 | 0.124812045 | 0 |
| WBGene00016125 | <a href="#">C26B2.2</a>    | 27.49664379 | 1.82975359  | 0.066544616 | 0 |
| WBGene00010692 | <a href="#">K08H2.5</a>    | 17.87180687 | 1.828111256 | 0.102290231 | 0 |
| WBGene00007244 | <a href="#">C01G12.3</a>   | 11.67151885 | 1.828099095 | 0.156629066 | 0 |
| WBGene00007060 | <a href="#">wht-6</a>      | 11.14687668 | 1.827988859 | 0.163991126 | 0 |
| WBGene00016398 | <a href="#">C34D4.2</a>    | 15.34958787 | 1.82756352  | 0.119062709 | 0 |
| WBGene00015230 | <a href="#">tag-344</a>    | 15.70892299 | 1.827311929 | 0.116323183 | 0 |
| WBGene00018301 | <a href="#">F41G3.5</a>    | 29.31867907 | 1.823270584 | 0.062188019 | 0 |
| WBGene00017910 | <a href="#">F28H1.5</a>    | 15.01834156 | 1.821068284 | 0.121256284 | 0 |
| WBGene00013429 | <a href="#">Y66D12A.3</a>  | 9.647539104 | 1.820247034 | 0.188674751 | 0 |
| WBGene00015937 | <a href="#">C17H12.12</a>  | 10.59285199 | 1.816340234 | 0.17146848  | 0 |
| WBGene00013696 | <a href="#">Y106G6A.4</a>  | 10.71277127 | 1.81237427  | 0.169178845 | 0 |
| WBGene00022705 | <a href="#">ZK354.2</a>    | 40.95571739 | 1.809491215 | 0.044181651 | 0 |
| WBGene00019229 | <a href="#">H23L24.2</a>   | 9.562503061 | 1.805973381 | 0.188859901 | 0 |
| WBGene00011114 | <a href="#">R07E5.6</a>    | 12.89544602 | 1.805271723 | 0.139992965 | 0 |
| WBGene00007611 | <a href="#">C15H7.4</a>    | 12.16443354 | 1.80327519  | 0.148241608 | 0 |
| WBGene00021858 | <a href="#">Y54F10BM.3</a> | 22.97564685 | 1.803179276 | 0.078482198 | 0 |
| WBGene00009390 | <a href="#">F35C5.1</a>    | 19.99283277 | 1.800675456 | 0.090066049 | 0 |
| WBGene00008912 | <a href="#">F17C8.7</a>    | 20.7711243  | 1.800317015 | 0.086674028 | 0 |
| WBGene00012819 | <a href="#">Y43F8B.9</a>   | 9.042007981 | 1.791408675 | 0.198120669 | 0 |
| WBGene00013886 | <a href="#">ZC412.5</a>    | 14.15900817 | 1.791177522 | 0.126504449 | 0 |
| WBGene00010574 | <a href="#">K04H4.5</a>    | 10.54229678 | 1.787096913 | 0.169516847 | 0 |
| WBGene00018983 | <a href="#">F56F4.7</a>    | 21.91695373 | 1.786010051 | 0.081489886 | 0 |

|                |                            |             |             |             |   |
|----------------|----------------------------|-------------|-------------|-------------|---|
| WBGene00023424 | <a href="#">C53D6.10</a>   | 8.708597083 | 1.784473831 | 0.204909449 | 0 |
| WBGene00013879 | <a href="#">ZC376.8</a>    | 11.26610849 | 1.781589274 | 0.15813706  | 0 |
| WBGene00010460 | <a href="#">clec-142</a>   | 11.05834979 | 1.777291112 | 0.160719379 | 0 |
| WBGene00014158 | <a href="#">ZK938.1</a>    | 27.69064838 | 1.775894809 | 0.064133378 | 0 |
| WBGene00012642 | <a href="#">Y39A1A.2</a>   | 11.77221597 | 1.773915446 | 0.150686621 | 0 |
| WBGene00007448 | <a href="#">C08F8.6</a>    | 11.2874314  | 1.773312371 | 0.157105041 | 0 |
| WBGene00010682 | <a href="#">K08F8.5</a>    | 11.20464789 | 1.772476393 | 0.158191173 | 0 |
| WBGene00016356 | <a href="#">C33F10.8</a>   | 24.52249556 | 1.770504528 | 0.072199199 | 0 |
| WBGene00018926 | <a href="#">F56A11.6</a>   | 13.94719401 | 1.770463    | 0.126940444 | 0 |
| WBGene00009708 | <a href="#">F44G3.7</a>    | 12.28718383 | 1.768540497 | 0.143933754 | 0 |
| WBGene00013775 | <a href="#">Y116A8A.4</a>  | 8.869226611 | 1.768066861 | 0.199348482 | 0 |
| WBGene00013303 | <a href="#">Y57G11C.5</a>  | 20.02633414 | 1.766810589 | 0.088224364 | 0 |
| WBGene00015004 | <a href="#">B0034.4</a>    | 12.71620468 | 1.766442762 | 0.138912734 | 0 |
| WBGene00009959 | <a href="#">F53B6.4</a>    | 11.58101715 | 1.764626121 | 0.152372292 | 0 |
| WBGene00006394 | <a href="#">taf-11.2</a>   | 10.71945423 | 1.763987868 | 0.164559485 | 0 |
| WBGene00016351 | <a href="#">C33F10.1</a>   | 22.43071991 | 1.762249193 | 0.078564094 | 0 |
| WBGene00015345 | <a href="#">C02F5.2</a>    | 28.77510121 | 1.759954735 | 0.061162417 | 0 |
| WBGene00003763 | <a href="#">nlp-25</a>     | 21.14917537 | 1.75833128  | 0.083139472 | 0 |
| WBGene00014029 | <a href="#">ZK637.12</a>   | 12.17046037 | 1.755245236 | 0.144221762 | 0 |
| WBGene00017112 | <a href="#">E03H12.5</a>   | 8.571096622 | 1.75401335  | 0.204642816 | 0 |
| WBGene00020968 | <a href="#">W03A5.4</a>    | 12.47127428 | 1.753941496 | 0.140638515 | 0 |
| WBGene00022634 | <a href="#">ZC581.7</a>    | 15.70934847 | 1.753730698 | 0.111636119 | 0 |
| WBGene00017387 | <a href="#">F11G11.9</a>   | 8.953447373 | 1.748543992 | 0.195292821 | 0 |
| WBGene00012636 | <a href="#">Y38H8A.2</a>   | 13.14277308 | 1.74626757  | 0.132869035 | 0 |
| WBGene00009402 | <a href="#">F35C11.3</a>   | 10.29535761 | 1.745624177 | 0.169554497 | 0 |
| WBGene00007457 | <a href="#">C08F11.10</a>  | 12.17089304 | 1.740011506 | 0.142964982 | 0 |
| WBGene00009550 | <a href="#">F38H4.6</a>    | 21.65764993 | 1.739396636 | 0.080313268 | 0 |
| WBGene00017550 | <a href="#">F18A12.1</a>   | 9.648965721 | 1.737100757 | 0.180029737 | 0 |
| WBGene00021010 | <a href="#">W03G1.2</a>    | 14.36115755 | 1.734479789 | 0.120775765 | 0 |
| WBGene00008063 | <a href="#">C41G7.6</a>    | 13.14694033 | 1.733359543 | 0.131845091 | 0 |
| WBGene00011493 | <a href="#">C33F10.12</a>  | 12.00910777 | 1.731817734 | 0.144208693 | 0 |
| WBGene00008559 | <a href="#">F07H5.8</a>    | 9.031961714 | 1.729884648 | 0.191529227 | 0 |
| WBGene00011795 | <a href="#">T16A9.5</a>    | 12.58608418 | 1.729674314 | 0.137427518 | 0 |
| WBGene00007563 | <a href="#">C14A4.13</a>   | 9.758330781 | 1.729581563 | 0.177241539 | 0 |
| WBGene00002212 | <a href="#">kin-31</a>     | 14.78095101 | 1.728848467 | 0.11696463  | 0 |
| WBGene00018122 | <a href="#">F36H12.8</a>   | 13.67818788 | 1.72781716  | 0.126319157 | 0 |
| WBGene00019783 | <a href="#">M70.1</a>      | 23.88932725 | 1.726966633 | 0.0722903   | 0 |
| WBGene00007649 | <a href="#">C17G1.2</a>    | 8.964925925 | 1.726350258 | 0.192567153 | 0 |
| WBGene00016461 | <a href="#">C35E7.9</a>    | 15.52768735 | 1.722886116 | 0.110955745 | 0 |
| WBGene00007209 | <a href="#">BE10.1</a>     | 16.07123448 | 1.722851881 | 0.107200967 | 0 |
| WBGene00022090 | <a href="#">Y69A2AR.19</a> | 9.569383388 | 1.722588344 | 0.18001038  | 0 |
| WBGene00021787 | <a href="#">Y51H7C.9</a>   | 9.264471056 | 1.720569525 | 0.185716973 | 0 |
| WBGene00011297 | <a href="#">R102.10</a>    | 13.70548005 | 1.720515422 | 0.125534853 | 0 |
| WBGene00008652 | <a href="#">F10D11.6</a>   | 9.59487048  | 1.719865715 | 0.179248456 | 0 |
| WBGene00015246 | <a href="#">scl-23</a>     | 8.676749812 | 1.718963685 | 0.198111473 | 0 |
| WBGene00021113 | <a href="#">gsp-3</a>      | 23.44511075 | 1.71289613  | 0.073059844 | 0 |
| WBGene00007239 | <a href="#">C01G10.14</a>  | 12.52072216 | 1.712809675 | 0.136797994 | 0 |
| WBGene00020105 | <a href="#">R148.7</a>     | 16.16274443 | 1.712064021 | 0.105926566 | 0 |
| WBGene00022888 | <a href="#">rnh-1.1</a>    | 10.57907777 | 1.710352654 | 0.161673134 | 0 |
| WBGene00012784 | <a href="#">Y43C5A.4</a>   | 8.412117401 | 1.709287697 | 0.203193514 | 0 |
| WBGene00013107 | <a href="#">Y24D9B.1</a>   | 22.12874742 | 1.705288705 | 0.077062143 | 0 |
| WBGene00020659 | <a href="#">T21G5.1</a>    | 15.548112   | 1.704066684 | 0.109599589 | 0 |
| WBGene00007335 | <a href="#">C05C12.1</a>   | 13.60942522 | 1.703830768 | 0.12519491  | 0 |
| WBGene00019260 | <a href="#">H34I24.1</a>   | 26.24162169 | 1.701426648 | 0.064836947 | 0 |
| WBGene00018000 | <a href="#">F33D11.1</a>   | 11.39129784 | 1.699596506 | 0.149201305 | 0 |
| WBGene00011918 | <a href="#">T22C1.8</a>    | 10.30657643 | 1.697903957 | 0.16473986  | 0 |
| WBGene00018359 | <a href="#">F42G8.8</a>    | 9.966886512 | 1.696021985 | 0.170165676 | 0 |

|                |                                 |             |             |             |   |
|----------------|---------------------------------|-------------|-------------|-------------|---|
| WBGene00016462 | <a href="#">C35E7.10</a>        | 9.044476237 | 1.692799092 | 0.187163861 | 0 |
| WBGene00013121 | <a href="#">spe-38</a>          | 30.21300235 | 1.689517893 | 0.055920225 | 0 |
| WBGene00020289 | <a href="#">T06C10.3</a>        | 10.43701744 | 1.687393971 | 0.161673963 | 0 |
| WBGene00016605 | <a href="#">C43E11.5</a>        | 9.019686664 | 1.686482328 | 0.186977929 | 0 |
| WBGene00019255 | <a href="#">H32C10.1</a>        | 9.956762657 | 1.683884914 | 0.16911972  | 0 |
| WBGene00012401 | <a href="#">Y6E2A.8</a>         | 8.974926189 | 1.682672745 | 0.18748597  | 0 |
| WBGene00012169 | <a href="#">W01B6.2</a>         | 29.12675853 | 1.679399941 | 0.057658319 | 0 |
| WBGene00017026 | <a href="#">ID/source/sourc</a> | 34.68539118 | 1.678982196 | 0.048406033 | 0 |
| WBGene00009446 | <a href="#">F35H8.1</a>         | 12.57841412 | 1.678778488 | 0.133465036 | 0 |
| WBGene00009548 | <a href="#">F38H4.4</a>         | 8.338470988 | 1.675635146 | 0.200952327 | 0 |
| WBGene00021633 | <a href="#">Y47G6A.3</a>        | 18.49202609 | 1.674414573 | 0.090547924 | 0 |
| WBGene00020990 | <a href="#">W03D8.10</a>        | 11.26837861 | 1.673841663 | 0.148543257 | 0 |
| WBGene00012086 | <a href="#">clec-118</a>        | 8.392447064 | 1.670954604 | 0.199102192 | 0 |
| WBGene00006409 | <a href="#">tag-19</a>          | 13.89276756 | 1.670744999 | 0.120260056 | 0 |
| WBGene00016181 | <a href="#">C28C12.11</a>       | 11.374995   | 1.666611724 | 0.146515381 | 0 |
| WBGene00022507 | <a href="#">ZC21.8</a>          | 10.64286994 | 1.666116912 | 0.15654771  | 0 |
| WBGene00021632 | <a href="#">Y47D9A.5</a>        | 31.00906928 | 1.664841446 | 0.053688856 | 0 |
| WBGene00021996 | <a href="#">Y59E9AL.6</a>       | 13.20726671 | 1.663009748 | 0.125916269 | 0 |
| WBGene00045306 | <a href="#">cyn-17</a>          | 10.15712972 | 1.662620358 | 0.16368998  | 0 |
| WBGene00018930 | <a href="#">F56B3.6</a>         | 10.12757579 | 1.660089932 | 0.163917799 | 0 |
| WBGene00011617 | <a href="#">T08G3.4</a>         | 26.7653065  | 1.659625684 | 0.062006601 | 0 |
| WBGene00044674 | <a href="#">B0280.17</a>        | 25.06361352 | 1.657986732 | 0.066151145 | 0 |
| WBGene00019785 | <a href="#">M70.3</a>           | 11.63456478 | 1.657853235 | 0.14249379  | 0 |
| WBGene00007159 | <a href="#">B0379.7</a>         | 19.57935317 | 1.656041589 | 0.084581016 | 0 |
| WBGene00007269 | <a href="#">C03C10.2</a>        | 8.552575901 | 1.655970004 | 0.193622369 | 0 |
| WBGene00007458 | <a href="#">C08F11.11</a>       | 10.19090736 | 1.655929577 | 0.162490887 | 0 |
| WBGene00017386 | <a href="#">nspd-5</a>          | 19.99399073 | 1.65500205  | 0.082774973 | 0 |
| WBGene00011669 | <a href="#">T09F5.10</a>        | 8.807418781 | 1.649761887 | 0.187315027 | 0 |
| WBGene00012486 | <a href="#">Y18D10A.21</a>      | 14.87332251 | 1.647941825 | 0.1107985   | 0 |
| WBGene00015024 | <a href="#">B0205.10</a>        | 10.14418219 | 1.646833584 | 0.162342666 | 0 |
| WBGene00007337 | <a href="#">C05C12.5</a>        | 11.66751321 | 1.643100734 | 0.140826987 | 0 |
| WBGene00007156 | <a href="#">B0379.2</a>         | 9.771618263 | 1.633557419 | 0.167173684 | 0 |
| WBGene00010035 | <a href="#">F54C8.1</a>         | 9.303648733 | 1.633385451 | 0.175563964 | 0 |
| WBGene00011120 | <a href="#">R07E5.15</a>        | 17.80081754 | 1.633200307 | 0.091748612 | 0 |
| WBGene00011954 | <a href="#">T23F11.2</a>        | 20.42817658 | 1.629896363 | 0.079786679 | 0 |
| WBGene00016288 | <a href="#">C31H1.5</a>         | 13.15046295 | 1.628959674 | 0.123870899 | 0 |
| WBGene00019062 | <a href="#">F58F12.2</a>        | 8.298899363 | 1.628697684 | 0.196254661 | 0 |
|                | <a href="#">Y39B6B.N</a>        | 11.48420789 | 1.628279274 | 0.141784204 | 0 |
| WBGene00007987 | <a href="#">C36H8.1</a>         | 9.411113461 | 1.626514725 | 0.172829148 | 0 |
| WBGene00009463 | <a href="#">F36D1.4</a>         | 9.454864517 | 1.626475968 | 0.172025307 | 0 |
| WBGene00012357 | <a href="#">W09D6.4</a>         | 12.1962944  | 1.62606437  | 0.13332446  | 0 |
| WBGene00015097 | <a href="#">B0273.1</a>         | 15.83107026 | 1.624329264 | 0.102603882 | 0 |
| WBGene00000389 | <a href="#">cdc-25.4</a>        | 24.3330889  | 1.624125588 | 0.066745558 | 0 |
| WBGene00013987 | <a href="#">ZK512.8</a>         | 13.80708656 | 1.622614326 | 0.117520399 | 0 |
| WBGene00006050 | <a href="#">ssq-1</a>           | 13.41517809 | 1.622601099 | 0.120952632 | 0 |
| WBGene00009705 | <a href="#">F44F4.10</a>        | 14.92741246 | 1.621875093 | 0.108650786 | 0 |
| WBGene00020715 | <a href="#">nspd-4</a>          | 12.7221219  | 1.620232733 | 0.127355542 | 0 |
| WBGene00019151 | <a href="#">H04M03.1</a>        | 8.333237402 | 1.615713263 | 0.193887824 | 0 |
| WBGene00007778 | <a href="#">C27D8.2</a>         | 12.66153167 | 1.60832372  | 0.12702442  | 0 |
| WBGene00007243 | <a href="#">C01G12.13</a>       | 12.24817364 | 1.605183688 | 0.131054942 | 0 |
| WBGene00004084 | <a href="#">pph-2</a>           | 12.62430554 | 1.604190823 | 0.127071609 | 0 |
| WBGene00009683 | <a href="#">F44D12.6</a>        | 10.57724068 | 1.603471336 | 0.151596374 | 0 |
| WBGene00016058 | <a href="#">nspd-3</a>          | 10.22896833 | 1.600927256 | 0.156509161 | 0 |
| WBGene00016040 | <a href="#">C24A11.1</a>        | 15.8079691  | 1.600887559 | 0.101270919 | 0 |
| WBGene00020235 | <a href="#">T05A12.4</a>        | 10.29749913 | 1.598268099 | 0.155209345 | 0 |
| WBGene00012191 | <a href="#">W02A2.8</a>         | 19.750271   | 1.597598209 | 0.080889939 | 0 |
| WBGene00020986 | <a href="#">W03D8.3</a>         | 12.38361474 | 1.594641542 | 0.12877028  | 0 |



|                |                           |             |             |             |   |
|----------------|---------------------------|-------------|-------------|-------------|---|
| WBGene00019081 | <a href="#">F59A3.8</a>   | 17.63256583 | 1.594616265 | 0.090435861 | 0 |
| WBGene00020218 | <a href="#">T04G9.7</a>   | 19.30651977 | 1.592995561 | 0.082510757 | 0 |
| WBGene00010651 | <a href="#">K08C9.2</a>   | 13.37433811 | 1.592188494 | 0.119048022 | 0 |
| WBGene00022849 | <a href="#">ZK1127.2</a>  | 9.822501413 | 1.589475043 | 0.161819783 | 0 |
| WBGene00020914 | <a href="#">sulp-6</a>    | 8.109562407 | 1.586230001 | 0.19559995  | 0 |
| WBGene00020985 | <a href="#">W03D8.2</a>   | 15.35905556 | 1.585567229 | 0.103233381 | 0 |
| WBGene00007721 | <a href="#">C25D7.12</a>  | 15.13921633 | 1.583630285 | 0.104604509 | 0 |
| WBGene00016445 | <a href="#">C35D10.8</a>  | 12.64043305 | 1.581289615 | 0.125097741 | 0 |
| WBGene00022542 | <a href="#">ZC190.8</a>   | 12.83205386 | 1.580318515 | 0.123153981 | 0 |
| WBGene00001538 | <a href="#">gcy-12</a>    | 12.41688891 | 1.57971658  | 0.127223219 | 0 |
| WBGene00019431 | <a href="#">K06A5.3</a>   | 11.97043417 | 1.579045606 | 0.131912142 | 0 |
| WBGene00044684 | <a href="#">T08G11.2</a>  | 9.08987275  | 1.577453027 | 0.173539616 | 0 |
| WBGene00018125 | <a href="#">rmd-4</a>     | 13.96002299 | 1.575544053 | 0.112861136 | 0 |
| WBGene00010466 | <a href="#">K01D12.15</a> | 14.16946313 | 1.573717481 | 0.111064016 | 0 |
| WBGene00000665 | <a href="#">col-90</a>    | 8.806330912 | 1.572539302 | 0.178569181 | 0 |
| WBGene00012912 | <a href="#">Y46G5A.22</a> | 11.35120929 | 1.572426427 | 0.138525014 | 0 |
| WBGene00009470 | <a href="#">F36D3.4</a>   | 9.721357042 | 1.5689062   | 0.161387571 | 0 |
| WBGene00010091 | <a href="#">F55C5.1</a>   | 10.99770666 | 1.567989009 | 0.14257418  | 0 |
| WBGene00017279 | <a href="#">F09C12.8</a>  | 10.10965119 | 1.567883833 | 0.155087827 | 0 |
| WBGene00010829 | <a href="#">M02B1.4</a>   | 13.1868348  | 1.561434065 | 0.118408556 | 0 |
| WBGene00006057 | <a href="#">sss-2</a>     | 26.34169084 | 1.55953787  | 0.059204167 | 0 |
| WBGene00011460 | <a href="#">ttr-14</a>    | 17.40937768 | 1.557422517 | 0.089458828 | 0 |
| WBGene00017438 | <a href="#">F13H8.5</a>   | 10.36226206 | 1.557273496 | 0.150283161 | 0 |
| WBGene00010378 | <a href="#">H12D21.2</a>  | 13.36903749 | 1.555801441 | 0.116373482 | 0 |
| WBGene00009308 | <a href="#">F32A11.3</a>  | 14.06494632 | 1.552024086 | 0.110346961 | 0 |
| WBGene00019642 | <a href="#">K11C4.1</a>   | 11.31403215 | 1.551643279 | 0.137143262 | 0 |
| WBGene00008541 | <a href="#">F07A5.2</a>   | 13.32897573 | 1.551025909 | 0.116364974 | 0 |
| WBGene00015627 | <a href="#">C09B9.2</a>   | 8.155092885 | 1.548616419 | 0.18989562  | 0 |
| WBGene00017215 | <a href="#">F07F6.1</a>   | 8.34316657  | 1.546156161 | 0.185320064 | 0 |
| WBGene00011365 | <a href="#">T02C1.1</a>   | 10.84228941 | 1.546051422 | 0.142594554 | 0 |
| WBGene00007998 | <a href="#">C38C6.5</a>   | 10.28375502 | 1.54537717  | 0.150273627 | 0 |
| WBGene00011951 | <a href="#">T23F6.3</a>   | 16.17440674 | 1.545248597 | 0.095536648 | 0 |
| WBGene00014997 | <a href="#">AC7.3</a>     | 15.35988618 | 1.543357021 | 0.100479717 | 0 |
| WBGene00015634 | <a href="#">C09D4.3</a>   | 12.25406002 | 1.542704387 | 0.125893327 | 0 |
| WBGene00004969 | <a href="#">spe-15</a>    | 13.20692038 | 1.542560775 | 0.11679943  | 0 |
| WBGene00007733 | <a href="#">C25G4.6</a>   | 10.15311383 | 1.540722157 | 0.151748733 | 0 |
| WBGene00016612 | <a href="#">C43G2.3</a>   | 8.586352732 | 1.539662131 | 0.179315034 | 0 |
| WBGene00004972 | <a href="#">spe-26</a>    | 9.817989126 | 1.539048974 | 0.156758065 | 0 |
| WBGene00009458 | <a href="#">F36A2.11</a>  | 10.54408333 | 1.535665368 | 0.145642378 | 0 |
| WBGene00008423 | <a href="#">D2045.5</a>   | 18.70783417 | 1.535115145 | 0.082057342 | 0 |
| WBGene00015796 | <a href="#">C15F1.5</a>   | 18.7475421  | 1.535033135 | 0.081879167 | 0 |
| WBGene00010719 | <a href="#">K09E4.1</a>   | 9.490857523 | 1.5301552   | 0.161224125 | 0 |
| WBGene00015696 | <a href="#">C10H11.7</a>  | 21.5707287  | 1.527363716 | 0.070807238 | 0 |
| WBGene00017737 | <a href="#">F23C8.8</a>   | 8.345748051 | 1.527236757 | 0.18299579  | 0 |
| WBGene00012741 | <a href="#">Y40H4A.2</a>  | 8.376326803 | 1.525181194 | 0.182082341 | 0 |
| WBGene00015051 | <a href="#">B0218.7</a>   | 9.400241731 | 1.524691022 | 0.162197001 | 0 |
| WBGene00012360 | <a href="#">tat-3</a>     | 9.603879609 | 1.523747922 | 0.158659623 | 0 |
| WBGene00009714 | <a href="#">F44G4.5</a>   | 10.32084163 | 1.521844401 | 0.147453517 | 0 |
| WBGene00012637 | <a href="#">C39H7.1</a>   | 21.5590703  | 1.519638285 | 0.07048719  | 0 |
| WBGene00012720 | <a href="#">Y39E4B.11</a> | 21.1647622  | 1.518950069 | 0.071767878 | 0 |
| WBGene00018360 | <a href="#">F42G8.9</a>   | 11.35383174 | 1.518284259 | 0.133724393 | 0 |
| WBGene00043998 | <a href="#">T21C12.4</a>  | 12.77630662 | 1.516658335 | 0.118708668 | 0 |
| WBGene00013190 | <a href="#">Y54E2A.5</a>  | 11.50749781 | 1.514805594 | 0.131636401 | 0 |
| WBGene00013052 | <a href="#">scrm-7</a>    | 8.571194227 | 1.513847232 | 0.176620339 | 0 |
| WBGene00008313 | <a href="#">C54G4.3</a>   | 9.567131268 | 1.510841551 | 0.157920019 | 0 |
| WBGene00016413 | <a href="#">C34F11.1</a>  | 13.13602559 | 1.508948085 | 0.114870976 | 0 |
| WBGene00007601 | <a href="#">C15C6.2</a>   | 19.71247391 | 1.507521244 | 0.076475497 | 0 |

|                |                            |             |             |             |   |
|----------------|----------------------------|-------------|-------------|-------------|---|
| WBGene00010712 | <a href="#">K09B11.5</a>   | 20.44524862 | 1.50639725  | 0.073679576 | 0 |
| WBGene00002206 | <a href="#">kin-24</a>     | 15.3347269  | 1.502569149 | 0.097984735 | 0 |
| WBGene00011968 | <a href="#">T23G11.1</a>   | 15.83927948 | 1.50238006  | 0.094851541 | 0 |
| WBGene00007788 | <a href="#">C28A5.1</a>    | 8.859680652 | 1.501504208 | 0.169476109 | 0 |
| WBGene00018087 | <a href="#">F36D4.1</a>    | 11.64611387 | 1.497873081 | 0.128615699 | 0 |
| WBGene00009449 | <a href="#">F35H8.4</a>    | 9.946965804 | 1.497311084 | 0.150529429 | 0 |
| WBGene00000681 | <a href="#">col-107</a>    | 8.473129954 | 1.496139993 | 0.176574654 | 0 |
| WBGene00000601 | <a href="#">col-12</a>     | 10.01195664 | 1.492499221 | 0.149071683 | 0 |
| WBGene00011133 | <a href="#">R08A2.2</a>    | 9.335958056 | 1.492298724 | 0.159844198 | 0 |
| WBGene00009680 | <a href="#">F44D12.3</a>   | 11.55163775 | 1.487172755 | 0.128741291 | 0 |
| WBGene00008651 | <a href="#">F10D11.5</a>   | 8.363812695 | 1.484987146 | 0.177549068 | 0 |
| WBGene00045484 | <a href="#">F34D10.9</a>   | 10.64461669 | 1.483308152 | 0.139348198 | 0 |
| WBGene00008259 | <a href="#">C52E4.7</a>    | 8.758726304 | 1.482430926 | 0.169251884 | 0 |
|                | <a href="#">yk116f3</a>    | 10.49772805 | 1.481485546 | 0.141124398 | 0 |
| WBGene00021381 | <a href="#">Y37E11B.10</a> | 8.270316058 | 1.479256847 | 0.1788634   | 0 |
| WBGene00022385 | <a href="#">Y95B8A.4</a>   | 11.34980487 | 1.478822149 | 0.13029494  | 0 |
| WBGene00015970 | <a href="#">C18E3.1</a>    | 13.45001326 | 1.476121842 | 0.109748728 | 0 |
| WBGene00010991 | <a href="#">R03D7.5</a>    | 14.88462336 | 1.475304834 | 0.099116034 | 0 |
| WBGene00014225 | <a href="#">ZK1098.9</a>   | 10.15446994 | 1.474789009 | 0.14523545  | 0 |
| WBGene00007715 | <a href="#">C25D7.2</a>    | 13.8187671  | 1.473620979 | 0.106639107 | 0 |
| WBGene00013192 | <a href="#">Y54E2A.7</a>   | 12.02087709 | 1.472735559 | 0.122514817 | 0 |
| WBGene00000704 | <a href="#">col-130</a>    | 8.777501232 | 1.472683113 | 0.167779311 | 0 |
| WBGene00009685 | <a href="#">F44D12.8</a>   | 13.41880055 | 1.471938461 | 0.109692253 | 0 |
| WBGene00018792 | <a href="#">F54C1.8</a>    | 8.953483968 | 1.46999175  | 0.164180977 | 0 |
| WBGene00013847 | <a href="#">ZC84.3</a>     | 16.71505623 | 1.468757395 | 0.087870323 | 0 |
| WBGene00013684 | <a href="#">Y105E8A.27</a> | 27.48273201 | 1.465387004 | 0.053320281 | 0 |
| WBGene00019410 | <a href="#">K05F1.9</a>    | 15.72512611 | 1.463634102 | 0.093076144 | 0 |
| WBGene00021630 | <a href="#">Y47D9A.3</a>   | 8.473190536 | 1.462715126 | 0.172628612 | 0 |
| WBGene00022761 | <a href="#">ZK546.4</a>    | 15.25370399 | 1.462134534 | 0.095854393 | 0 |
| WBGene00012207 | <a href="#">W02B12.12</a>  | 9.050410435 | 1.461267498 | 0.161458699 | 0 |
| WBGene00020905 | <a href="#">T28H11.7</a>   | 11.05027723 | 1.459602045 | 0.132087369 | 0 |
| WBGene00022780 | <a href="#">ZK622.1</a>    | 16.85929619 | 1.456411837 | 0.086386277 | 0 |
| WBGene00020353 | <a href="#">T08B6.4</a>    | 12.24867753 | 1.456201152 | 0.118886398 | 0 |
| WBGene00008508 | <a href="#">F01G10.5</a>   | 17.15917743 | 1.455334492 | 0.084813768 | 0 |
| WBGene00016153 | <a href="#">C27A2.5</a>    | 11.010025   | 1.449434964 | 0.131646837 | 0 |
| WBGene00012171 | <a href="#">W01B6.4</a>    | 12.49652063 | 1.444638147 | 0.11560323  | 0 |
| WBGene00020660 | <a href="#">T21G5.2</a>    | 10.29267516 | 1.444381113 | 0.140330972 | 0 |
| WBGene00013700 | <a href="#">Y106G6D.3</a>  | 9.110965355 | 1.443131993 | 0.15839507  | 0 |
| WBGene00009948 | <a href="#">F52H3.6</a>    | 25.46307396 | 1.440404877 | 0.056568381 | 0 |
| WBGene00008074 | <a href="#">C43F9.6</a>    | 11.50469506 | 1.440343225 | 0.125196124 | 0 |
| WBGene00012120 | <a href="#">T28C6.5</a>    | 21.34820587 | 1.439949274 | 0.067450599 | 0 |
| WBGene00022708 | <a href="#">ZK354.7</a>    | 9.126505079 | 1.436141222 | 0.157359385 | 0 |
| WBGene00017853 | <a href="#">F27C1.3</a>    | 11.77402313 | 1.426890287 | 0.121189696 | 0 |
| WBGene00010547 | <a href="#">K03H1.12</a>   | 14.09728574 | 1.425532969 | 0.101121095 | 0 |
| WBGene00011587 | <a href="#">T07F10.1</a>   | 10.27769317 | 1.420559224 | 0.138217711 | 0 |
| WBGene00008383 | <a href="#">D1081.5</a>    | 8.830011785 | 1.412822069 | 0.160002286 | 0 |
| WBGene00017114 | <a href="#">E03H12.7</a>   | 19.84084611 | 1.412677942 | 0.071200489 | 0 |
| WBGene00008230 | <a href="#">C50F4.2</a>    | 24.0317666  | 1.412648078 | 0.058782532 | 0 |
| WBGene00016742 | <a href="#">C48B6.4</a>    | 8.165272912 | 1.410774373 | 0.172777369 | 0 |
| WBGene00011203 | <a href="#">R10E4.7</a>    | 16.13277073 | 1.410646954 | 0.087439844 | 0 |
| WBGene00006038 | <a href="#">ssp-11</a>     | 16.50239697 | 1.410224477 | 0.085455736 | 0 |
| WBGene00007190 | <a href="#">rmd-3</a>      | 9.753485696 | 1.410084933 | 0.14457241  | 0 |
| WBGene00003837 | <a href="#">oat-1</a>      | 9.260553678 | 1.409295432 | 0.152182632 | 0 |
| WBGene00012627 | <a href="#">Y38H6C.15</a>  | 19.6719293  | 1.40668681  | 0.071507313 | 0 |
| WBGene00021386 | <a href="#">Y37F4.5</a>    | 18.41911734 | 1.405971694 | 0.076332197 | 0 |
| WBGene00019024 | <a href="#">F58A6.5</a>    | 8.254897826 | 1.405232208 | 0.170230115 | 0 |
| WBGene00007415 | <a href="#">C07E3.4</a>    | 17.63926536 | 1.400013926 | 0.079369174 | 0 |

|                |                            |             |             |             |   |
|----------------|----------------------------|-------------|-------------|-------------|---|
| WBGene00020940 | <a href="#">W02D7.4</a>    | 9.785385855 | 1.398277962 | 0.142894515 | 0 |
| WBGene00016161 | <a href="#">C27D6.3</a>    | 10.76973274 | 1.397254779 | 0.129739039 | 0 |
| WBGene00013290 | <a href="#">Y57G11A.2</a>  | 11.68674424 | 1.396000881 | 0.11945165  | 0 |
| WBGene00013318 | <a href="#">Y57G11C.23</a> | 10.63047538 | 1.395801097 | 0.131301851 | 0 |
| WBGene00022778 | <a href="#">ZK616.8</a>    | 9.476703481 | 1.393709216 | 0.14706688  | 0 |
| WBGene00008620 | <a href="#">F09C6.10</a>   | 17.22958793 | 1.389371782 | 0.080638712 | 0 |
| WBGene00011262 | <a href="#">R13H4.3</a>    | 12.05262129 | 1.389027513 | 0.115246923 | 0 |
| WBGene00016212 | <a href="#">C29F5.3</a>    | 8.138075604 | 1.384933029 | 0.170179425 | 0 |
| WBGene00015630 | <a href="#">C09B9.7</a>    | 8.357659489 | 1.384638713 | 0.165673023 | 0 |
| WBGene00020372 | <a href="#">T09A12.1</a>   | 16.61968301 | 1.383659454 | 0.083254263 | 0 |
| WBGene00016541 | <a href="#">C39H7.1</a>    | 10.83117393 | 1.382486902 | 0.127639618 | 0 |
| WBGene00018158 | <a href="#">F37E3.3</a>    | 10.16545098 | 1.382445249 | 0.135994483 | 0 |
| WBGene00018497 | <a href="#">F46F5.6</a>    | 12.61108028 | 1.381467215 | 0.109543924 | 0 |
| WBGene00013297 | <a href="#">Y57G11B.5</a>  | 9.413713454 | 1.380595286 | 0.146657883 | 0 |
| WBGene00022834 | <a href="#">ZK973.8</a>    | 12.46524408 | 1.379434332 | 0.110662441 | 0 |
| WBGene00014223 | <a href="#">ZK1098.6</a>   | 9.286147883 | 1.379182128 | 0.148520371 | 0 |
| WBGene00022417 | <a href="#">Y102A11A.7</a> | 9.2470301   | 1.378973018 | 0.149126044 | 0 |
| WBGene00010155 | <a href="#">F56F3.4</a>    | 8.872495187 | 1.377324782 | 0.155235337 | 0 |
| WBGene00016825 | <a href="#">C50E10.1</a>   | 13.48300876 | 1.375751158 | 0.102035917 | 0 |
| WBGene00022162 | <a href="#">Y71G12B.27</a> | 8.240057598 | 1.373140851 | 0.166642142 | 0 |
| WBGene00021608 | <a href="#">Y46H3D.1</a>   | 8.449492918 | 1.371324529 | 0.162296666 | 0 |
| WBGene00014127 | <a href="#">ZK892.3</a>    | 8.704159324 | 1.367749267 | 0.157137435 | 0 |
| WBGene00013956 | <a href="#">ZK265.3</a>    | 20.03040054 | 1.364791882 | 0.068136025 | 0 |
| WBGene00021650 | <a href="#">Y47G6A.26</a>  | 8.381401128 | 1.361967817 | 0.162498823 | 0 |
| WBGene00010650 | <a href="#">K08C9.1</a>    | 19.7428883  | 1.359457104 | 0.068858066 | 0 |
| WBGene00009079 | <a href="#">F23B12.1</a>   | 14.94928893 | 1.355570089 | 0.090677897 | 0 |
| WBGene00007709 | <a href="#">clec-87</a>    | 9.380393814 | 1.352238689 | 0.144155855 | 0 |
| WBGene00001424 | <a href="#">fis-1</a>      | 10.98954324 | 1.350465604 | 0.122886418 | 0 |
| WBGene00010362 | <a href="#">H04D03.1</a>   | 11.87245188 | 1.349080695 | 0.113631178 | 0 |
| WBGene00010869 | <a href="#">M05B5.1</a>    | 8.712264108 | 1.347597459 | 0.154678215 | 0 |
| WBGene00021398 | <a href="#">Y38C1AA.7</a>  | 10.8076867  | 1.340156889 | 0.124000346 | 0 |
| WBGene00021153 | <a href="#">Y4C6A.3</a>    | 9.172408017 | 1.339146315 | 0.145997247 | 0 |
| WBGene00018081 | <a href="#">F36A4.2</a>    | 9.185835991 | 1.337555872 | 0.145610685 | 0 |
| WBGene00021720 | <a href="#">Y49F6B.8</a>   | 17.29185468 | 1.335462563 | 0.07723073  | 0 |
| WBGene00015467 | <a href="#">C05D2.3</a>    | 14.98345649 | 1.332670935 | 0.088942824 | 0 |
| WBGene00009682 | <a href="#">F44D12.5</a>   | 8.35102983  | 1.332640487 | 0.159577982 | 0 |
| WBGene00010241 | <a href="#">F58D2.2</a>    | 12.93668675 | 1.330809205 | 0.102870946 | 0 |
| WBGene00022140 | <a href="#">Y71G12A.4</a>  | 9.200839784 | 1.328997247 | 0.144443038 | 0 |
| WBGene00010779 | <a href="#">K11H3.2</a>    | 11.11809644 | 1.328866154 | 0.119522812 | 0 |
| WBGene00015094 | <a href="#">B0261.6</a>    | 12.84198287 | 1.327477459 | 0.103370132 | 0 |
| WBGene00007688 | <a href="#">C18E9.8</a>    | 12.338316   | 1.327332692 | 0.107578108 | 0 |
| WBGene00007572 | <a href="#">C14A6.8</a>    | 9.509342212 | 1.320363661 | 0.138849106 | 0 |
| WBGene00018083 | <a href="#">F36A4.4</a>    | 10.3802197  | 1.31889425  | 0.127058414 | 0 |
| WBGene00006591 | <a href="#">toh-1</a>      | 11.90485854 | 1.318152376 | 0.110723901 | 0 |
| WBGene00016512 | <a href="#">C38C3.3</a>    | 14.92182775 | 1.316332183 | 0.088215211 | 0 |
| WBGene00017851 | <a href="#">F27C1.1</a>    | 8.756826613 | 1.311040394 | 0.149716382 | 0 |
| WBGene00018199 | <a href="#">F39E9.7</a>    | 10.76703038 | 1.301312527 | 0.120860858 | 0 |
| WBGene00019406 | <a href="#">acdH-8</a>     | 12.06211389 | 1.30113269  | 0.107869375 | 0 |
| WBGene00022467 | <a href="#">Y119C1B.1</a>  | 11.78698405 | 1.300323377 | 0.110318583 | 0 |
| WBGene00006624 | <a href="#">try-6</a>      | 10.43203367 | 1.298927957 | 0.124513398 | 0 |
| WBGene00007631 | <a href="#">wht-3</a>      | 8.57971812  | 1.298798524 | 0.151380093 | 0 |
| WBGene00021880 | <a href="#">Y54G2A.15</a>  | 23.72062222 | 1.295490085 | 0.054614507 | 0 |
| WBGene00021786 | <a href="#">Y51H7C.8</a>   | 16.32620779 | 1.294926759 | 0.079315832 | 0 |
| WBGene00021995 | <a href="#">Y59E9AL.5</a>  | 8.551895329 | 1.293040948 | 0.151199342 | 0 |
| WBGene00019531 | <a href="#">scrm-5</a>     | 9.439045457 | 1.291208955 | 0.136794442 | 0 |
| WBGene00001487 | <a href="#">frk-1</a>      | 8.523013857 | 1.2840656   | 0.150658631 | 0 |
| WBGene00001245 | <a href="#">elo-7</a>      | 10.72259086 | 1.28385109  | 0.119733291 | 0 |

|                |                            |             |             |             |   |
|----------------|----------------------------|-------------|-------------|-------------|---|
| WBGene00012809 | <a href="#">Y43F8A.2</a>   | 18.55573721 | 1.282800896 | 0.069132306 | 0 |
| WBGene00012859 | <a href="#">Y45F3A.1</a>   | 12.17140958 | 1.280549006 | 0.105209589 | 0 |
| WBGene00021472 | <a href="#">Y39G10AR.E</a> | 13.11594278 | 1.278426898 | 0.097471216 | 0 |
| WBGene00011129 | <a href="#">R07H5.9</a>    | 9.071300662 | 1.275020074 | 0.140555376 | 0 |
| WBGene00018163 | <a href="#">F38A5.6</a>    | 9.275240464 | 1.27133004  | 0.137067071 | 0 |
| WBGene00007301 | <a href="#">C04F12.7</a>   | 11.74483576 | 1.268839342 | 0.108033809 | 0 |
| WBGene00019912 | <a href="#">R06B10.1</a>   | 15.41733427 | 1.268037226 | 0.082247502 | 0 |
| WBGene00016942 | <a href="#">C55B7.3</a>    | 10.69466615 | 1.265044489 | 0.118287422 | 0 |
| WBGene00010452 | <a href="#">K01A11.5</a>   | 8.125469826 | 1.259736492 | 0.155035526 | 0 |
| WBGene00016322 | <a href="#">C32E8.4</a>    | 13.14410292 | 1.259339946 | 0.095810262 | 0 |
| WBGene00018098 | <a href="#">F36F12.7</a>   | 10.55360066 | 1.258732858 | 0.119270465 | 0 |
| WBGene00007195 | <a href="#">B0513.2</a>    | 8.81283375  | 1.246943468 | 0.141491773 | 0 |
| WBGene00003879 | <a href="#">ora-1</a>      | 14.24710302 | 1.245783682 | 0.087441193 | 0 |
| WBGene00014169 | <a href="#">ZK945.7</a>    | 13.57787549 | 1.244471534 | 0.091654363 | 0 |
| WBGene00010181 | <a href="#">F57A8.6</a>    | 9.609057143 | 1.24372937  | 0.129433029 | 0 |
| WBGene00019773 | <a href="#">M04G7.2</a>    | 12.36828088 | 1.242176043 | 0.100432393 | 0 |
| WBGene00004904 | <a href="#">snf-5</a>      | 11.02267083 | 1.242164277 | 0.112691769 | 0 |
| WBGene00013175 | <a href="#">Y53F4B.36</a>  | 19.39475259 | 1.241585628 | 0.064016575 | 0 |
| WBGene00009738 | <a href="#">F45H7.6</a>    | 9.629948316 | 1.240850858 | 0.128853325 | 0 |
| WBGene00009043 | <a href="#">F22B5.5</a>    | 13.50874206 | 1.238803376 | 0.091703829 | 0 |
| WBGene00019430 | <a href="#">K06A5.2</a>    | 10.49440104 | 1.238576585 | 0.118022608 | 0 |
| WBGene00004955 | <a href="#">spd-5</a>      | 12.02582792 | 1.229749598 | 0.102259038 | 0 |
| WBGene00013198 | <a href="#">Y54E5A.2</a>   | 8.958954015 | 1.22852469  | 0.137128139 | 0 |
| WBGene00013474 | <a href="#">Y69E1A.2</a>   | 12.76292846 | 1.22815563  | 0.096228356 | 0 |
| WBGene00018134 | <a href="#">F37A4.4</a>    | 25.55526572 | 1.227919945 | 0.048049586 | 0 |
| WBGene00018500 | <a href="#">F46F5.9</a>    | 11.9810944  | 1.227245799 | 0.102431861 | 0 |
| WBGene00011214 | <a href="#">R10E9.2</a>    | 13.0009089  | 1.226917689 | 0.094371686 | 0 |
| WBGene00010623 | <a href="#">K07A12.5</a>   | 11.00657629 | 1.224996628 | 0.111296792 | 0 |
| WBGene00017271 | <a href="#">F08F8.6</a>    | 9.890936768 | 1.224366992 | 0.123786758 | 0 |
| WBGene00019184 | <a href="#">H10E21.4</a>   | 8.87301717  | 1.224133008 | 0.137961303 | 0 |
| WBGene00015211 | <a href="#">B0496.2</a>    | 12.95696722 | 1.222638672 | 0.094361485 | 0 |
| WBGene00007308 | <a href="#">C04G2.9</a>    | 14.96670461 | 1.22162003  | 0.081622512 | 0 |
| WBGene00003663 | <a href="#">nhr-245</a>    | 12.42327308 | 1.219825065 | 0.098188703 | 0 |
| WBGene00022228 | <a href="#">Y73B6A.1</a>   | 21.89389092 | 1.218695399 | 0.055663719 | 0 |
| WBGene00007196 | <a href="#">B0513.4</a>    | 8.287385321 | 1.206257877 | 0.145553492 | 0 |
| WBGene00021969 | <a href="#">Y57G7A.6</a>   | 8.681992402 | 1.201117383 | 0.138345823 | 0 |
| WBGene00014241 | <a href="#">ZK1251.3</a>   | 9.627581306 | 1.199512104 | 0.12459122  | 0 |
| WBGene00003469 | <a href="#">msp-142</a>    | 9.720930862 | 1.199302143 | 0.123373179 | 0 |
| WBGene00019020 | <a href="#">F57H12.5</a>   | 10.27922932 | 1.197232992 | 0.116471085 | 0 |
| WBGene00022760 | <a href="#">ZK546.3</a>    | 22.75786701 | 1.195567333 | 0.052534244 | 0 |
| WBGene00014156 | <a href="#">ZK930.6</a>    | 9.967006208 | 1.192509759 | 0.119645733 | 0 |
| WBGene00009321 | <a href="#">F32B6.4</a>    | 9.086218127 | 1.189164562 | 0.130875634 | 0 |
| WBGene00018253 | <a href="#">F40H6.1</a>    | 12.93343859 | 1.188226452 | 0.091872432 | 0 |
| WBGene00004078 | <a href="#">pos-1</a>      | 9.815286367 | 1.186858678 | 0.120919414 | 0 |
| WBGene00001977 | <a href="#">hmg-12</a>     | 12.89816089 | 1.18464116  | 0.091845742 | 0 |
| WBGene00005013 | <a href="#">F43G6.6</a>    | 11.2715079  | 1.183768823 | 0.105023111 | 0 |
| WBGene00000707 | <a href="#">col-133</a>    | 13.9882413  | 1.182302473 | 0.084521167 | 0 |
| WBGene00007559 | <a href="#">C14A4.8</a>    | 9.670751693 | 1.179662891 | 0.121982544 | 0 |
| WBGene00009581 | <a href="#">F40F9.3</a>    | 9.477229897 | 1.176506734 | 0.12414036  | 0 |
| WBGene00022650 | <a href="#">ZK84.2</a>     | 8.949046818 | 1.17241508  | 0.131010051 | 0 |
| WBGene00004964 | <a href="#">spe-10</a>     | 18.818444   | 1.166260889 | 0.061974353 | 0 |
| WBGene00016780 | <a href="#">C49G7.1</a>    | 8.56573322  | 1.165083833 | 0.136016825 | 0 |
| WBGene00021360 | <a href="#">Y37E11AL.4</a> | 19.65359813 | 1.163524998 | 0.059201628 | 0 |
| WBGene00015386 | <a href="#">C03B8.3</a>    | 10.42733968 | 1.161518331 | 0.111391627 | 0 |
| WBGene00009125 | <a href="#">F25H5.2</a>    | 9.973827123 | 1.160284618 | 0.116332939 | 0 |
| WBGene00017175 | <a href="#">F02C9.4</a>    | 12.74748531 | 1.160281371 | 0.091020412 | 0 |
| WBGene00003456 | <a href="#">msp-63</a>     | 9.545444057 | 1.159552457 | 0.121477058 | 0 |

|                |                            |             |             |             |   |
|----------------|----------------------------|-------------|-------------|-------------|---|
| WBGene00015384 | <a href="#">C03B8.1</a>    | 10.18096648 | 1.159512414 | 0.11389021  | 0 |
| WBGene00022884 | <a href="#">ZK1248.17</a>  | 8.674414488 | 1.156074632 | 0.133274083 | 0 |
| WBGene00007795 | <a href="#">C28D4.8</a>    | 8.312396164 | 1.151479214 | 0.138525546 | 0 |
| WBGene00004174 | <a href="#">pgn-95</a>     | 8.498837857 | 1.149810838 | 0.135290361 | 0 |
| WBGene00020293 | <a href="#">T06D4.4</a>    | 16.68753984 | 1.149138837 | 0.068862088 | 0 |
|                | <a href="#">Y67D8B.A</a>   | 10.62458219 | 1.147510748 | 0.108005259 | 0 |
| WBGene00007446 | <a href="#">C08F8.4</a>    | 10.29780045 | 1.146134764 | 0.111298988 | 0 |
| WBGene00011537 | <a href="#">T06E4.10</a>   | 8.567431603 | 1.142294759 | 0.133329895 | 0 |
| WBGene00013785 | <a href="#">Y116A8C.4</a>  | 11.26858652 | 1.132493926 | 0.100500087 | 0 |
| WBGene00022288 | <a href="#">Y75B7B.1</a>   | 8.168270985 | 1.130497432 | 0.138401068 | 0 |
| WBGene00022875 | <a href="#">ZK1248.4</a>   | 12.27017184 | 1.12635691  | 0.091796344 | 0 |
| WBGene00016414 | <a href="#">C34F11.2</a>   | 8.858366355 | 1.116385934 | 0.126026164 | 0 |
| WBGene00007080 | <a href="#">sfxn-1.1</a>   | 11.99785905 | 1.115299455 | 0.092958206 | 0 |
| WBGene00012549 | <a href="#">Y37D8A.8</a>   | 8.339669818 | 1.109475496 | 0.133035902 | 0 |
| WBGene00020380 | <a href="#">T09B4.6</a>    | 10.70147271 | 1.107558284 | 0.103495875 | 0 |
| WBGene00014170 | <a href="#">ZK945.8</a>    | 11.35471994 | 1.107431344 | 0.097530485 | 0 |
| WBGene00013723 | <a href="#">Y106G6H.13</a> | 8.588577636 | 1.107103437 | 0.128904166 | 0 |
| WBGene00019169 | <a href="#">H06I04.5</a>   | 10.27430753 | 1.099901606 | 0.1070536   | 0 |
| WBGene00003526 | <a href="#">nas-7</a>      | 9.572498184 | 1.09922416  | 0.114831483 | 0 |
| WBGene00015348 | <a href="#">C02F5.5</a>    | 11.68051008 | 1.098954655 | 0.094084475 | 0 |
| WBGene00020414 | <a href="#">T10E9.4</a>    | 10.84473918 | 1.093744027 | 0.100854802 | 0 |
| WBGene00022098 | <a href="#">Y69A2AR.27</a> | 9.735498765 | 1.093350266 | 0.112305521 | 0 |
| WBGene00003462 | <a href="#">msp-74</a>     | 12.17826546 | 1.09187223  | 0.08965745  | 0 |
| WBGene00010082 | <a href="#">F55A11.11</a>  | 13.65262273 | 1.090148228 | 0.079848997 | 0 |
| WBGene00012273 | <a href="#">W05B2.7</a>    | 10.05542762 | 1.086855336 | 0.108086436 | 0 |
| WBGene00006052 | <a href="#">ssq-3</a>      | 8.447109358 | 1.079848252 | 0.127836424 | 0 |
| WBGene00022110 | <a href="#">Y71F9AL.4</a>  | 8.858971374 | 1.076359312 | 0.121499355 | 0 |
| WBGene00013449 | <a href="#">Y67A6A.1</a>   | 10.31167403 | 1.076159882 | 0.104363256 | 0 |
| WBGene00011320 | <a href="#">T01C3.3</a>    | 10.04388172 | 1.07190472  | 0.106722157 | 0 |
| WBGene00012905 | <a href="#">Y46G5A.14</a>  | 10.03093676 | 1.070043792 | 0.106674363 | 0 |
| WBGene00012087 | <a href="#">T27E7.1</a>    | 11.2548478  | 1.0671025   | 0.094812699 | 0 |
|                | <a href="#">yk730h1</a>    | 15.83296712 | 1.06308203  | 0.067143576 | 0 |
|                | <a href="#">Y39G10BM.E</a> | 8.403697942 | 1.062791807 | 0.126467159 | 0 |
|                | <a href="#">yk716c10</a>   | 9.773760963 | 1.06183711  | 0.108641608 | 0 |
| WBGene00009313 | <a href="#">F32B4.2</a>    | 8.961891469 | 1.054554566 | 0.117670982 | 0 |
| WBGene00009501 | <a href="#">F37A8.1</a>    | 9.99744395  | 1.049164008 | 0.104943225 | 0 |
| WBGene00015556 | <a href="#">C06G3.12</a>   | 8.750911769 | 1.045416145 | 0.119463682 | 0 |
| WBGene00015572 | <a href="#">C07G1.6</a>    | 9.474395372 | 1.042646544 | 0.110048874 | 0 |
| WBGene00001569 | <a href="#">C36C9.1</a>    | 8.122639453 | 1.037305354 | 0.127705453 | 0 |
| WBGene00017392 | <a href="#">F12A10.3</a>   | 9.239378121 | 1.028986228 | 0.111369641 | 0 |
| WBGene00010114 | <a href="#">F55D12.6</a>   | 8.171088577 | 1.024146457 | 0.125337823 | 0 |
| WBGene00015820 | <a href="#">C16A11.7</a>   | 14.87690421 | 1.015267326 | 0.068244529 | 0 |
| WBGene00007246 | <a href="#">nspb-10</a>    | 9.022959221 | 1.012183244 | 0.112178634 | 0 |
| WBGene00021445 | <a href="#">Y39A3CR.5</a>  | 10.82926448 | 1.011575274 | 0.093411263 | 0 |
| WBGene00016147 | <a href="#">cyp-32A1</a>   | 8.851781    | 1.006594798 | 0.11371664  | 0 |
| WBGene00005444 | <a href="#">srh-237</a>    | 12.93497476 | 0.99730304  | 0.077101275 | 0 |
| WBGene00021151 | <a href="#">Y4C6A.1</a>    | 13.75890574 | 0.994724329 | 0.072296762 | 0 |
| WBGene00020463 | <a href="#">T12E12.2</a>   | 9.810743427 | 0.993266178 | 0.101242703 | 0 |
| WBGene00009704 | <a href="#">F44F4.9</a>    | 11.03223817 | 0.992187502 | 0.089935287 | 0 |
| WBGene00008677 | <a href="#">F11A5.9</a>    | 8.727677987 | 0.990706113 | 0.113513138 | 0 |
| WBGene00006049 | <a href="#">ssp-32</a>     | 9.857861587 | 0.98974892  | 0.10040199  | 0 |
| WBGene00003431 | <a href="#">msp-33</a>     | 8.277183182 | 0.981332507 | 0.118558752 | 0 |
| WBGene00008487 | <a href="#">F01D4.3</a>    | 11.48739722 | 0.980866534 | 0.085386316 | 0 |
| WBGene00011434 | <a href="#">T04D3.5</a>    | 18.51418421 | 0.976258066 | 0.052730277 | 0 |
| WBGene00022833 | <a href="#">ZK973.4</a>    | 12.21039697 | 0.9759837   | 0.079930546 | 0 |
| WBGene00020349 | <a href="#">T08B2.11</a>   | 10.88467298 | 0.968278309 | 0.08895796  | 0 |
| WBGene00011554 | <a href="#">T07A5.1</a>    | 9.359359238 | 0.954985536 | 0.102035354 | 0 |

|                |                            |              |              |             |   |
|----------------|----------------------------|--------------|--------------|-------------|---|
| WBGene00010485 | <a href="#">ant-1.3</a>    | 8.215966408  | 0.94939237   | 0.115554558 | 0 |
| WBGene00000248 | <a href="#">ben-1</a>      | 14.64823108  | 0.938965029  | 0.064100916 | 0 |
| WBGene00003579 | <a href="#">ndx-2</a>      | 9.111796747  | 0.936404353  | 0.102768354 | 0 |
| WBGene00001249 | <a href="#">elt-1</a>      | 15.24353636  | 0.934234098  | 0.061287229 | 0 |
| WBGene00011088 | <a href="#">R07B7.4</a>    | 12.44050812  | 0.933637372  | 0.07504817  | 0 |
| WBGene00013306 | <a href="#">Y57G11C.8</a>  | 10.11259485  | 0.931605721  | 0.092123311 | 0 |
| WBGene00000727 | <a href="#">col-154</a>    | 8.348419567  | 0.931090357  | 0.111528937 | 0 |
| WBGene00013701 | <a href="#">Y106G6D.4</a>  | 14.31188907  | 0.929027587  | 0.064912995 | 0 |
| WBGene00004908 | <a href="#">snf-9</a>      | 15.38791278  | 0.927617932  | 0.060282245 | 0 |
| WBGene00009398 | <a href="#">nspb-11</a>    | 13.56655466  | 0.91702481   | 0.067594524 | 0 |
| WBGene00008662 | <a href="#">F10G8.2</a>    | 15.72990956  | 0.916628423  | 0.058272962 | 0 |
| WBGene00017553 | <a href="#">F18A12.4</a>   | 11.83478988  | 0.898563326  | 0.075925583 | 0 |
| WBGene00022628 | <a href="#">ZC513.3</a>    | 13.24014686  | 0.896153384  | 0.06768455  | 0 |
| WBGene00003442 | <a href="#">msp-49</a>     | 9.444405029  | 0.893456023  | 0.094601621 | 0 |
| WBGene00003438 | <a href="#">msp-45</a>     | 16.05696979  | 0.888614853  | 0.055341379 | 0 |
| WBGene00021358 | <a href="#">Y37E11AL.2</a> | 12.98020828  | 0.887421032  | 0.068367241 | 0 |
| WBGene00000642 | <a href="#">col-66</a>     | 8.439533161  | 0.883216247  | 0.104652263 | 0 |
| WBGene00013394 | <a href="#">Y62H9A.6</a>   | 10.80330351  | 0.878583483  | 0.081325447 | 0 |
| WBGene00016807 | <a href="#">C50D2.3</a>    | 10.97583744  | 0.864132954  | 0.07873048  | 0 |
| WBGene00019405 | <a href="#">K05F1.1</a>    | 11.37333415  | 0.853725913  | 0.07506382  | 0 |
| WBGene00003424 | <a href="#">msp-3</a>      | 9.035307949  | 0.848627433  | 0.093923465 | 0 |
| WBGene00010507 | <a href="#">K02E2.6</a>    | 9.35950822   | 0.847867197  | 0.090588862 | 0 |
| WBGene00000878 | <a href="#">cyn-2</a>      | 10.88827784  | 0.846614707  | 0.077754694 | 0 |
| WBGene00014246 | <a href="#">ZK1307.3</a>   | 13.15359994  | 0.831070853  | 0.063182008 | 0 |
| WBGene00018127 | <a href="#">F36H12.14</a>  | 8.257722533  | 0.830993491  | 0.100632285 | 0 |
| WBGene00017058 | <a href="#">D2062.6</a>    | 10.775963    | 0.825848733  | 0.076638045 | 0 |
| WBGene00003443 | <a href="#">msp-50</a>     | 10.47679119  | 0.825712763  | 0.078813517 | 0 |
| WBGene00003470 | <a href="#">msp-152</a>    | 9.132571881  | 0.81802586   | 0.089572343 | 0 |
| WBGene00007461 | <a href="#">C08F11.14</a>  | 8.578967077  | 0.815033522  | 0.095003689 | 0 |
| WBGene00015098 | <a href="#">B0273.3</a>    | 9.891382613  | 0.81137344   | 0.082028314 | 0 |
| WBGene00003463 | <a href="#">msp-76</a>     | 10.48196319  | 0.81134467   | 0.077403885 | 0 |
| WBGene00021273 | <a href="#">Y23H5B.2</a>   | 9.27192247   | 0.810748474  | 0.087441248 | 0 |
| WBGene00003434 | <a href="#">msp-38</a>     | 8.563062308  | 0.808424763  | 0.094408371 | 0 |
| WBGene00020356 | <a href="#">T08B6.9</a>    | 8.281053773  | 0.808107266  | 0.097585077 | 0 |
| WBGene00020270 | <a href="#">T05H4.7</a>    | 9.255955407  | 0.788103857  | 0.085145598 | 0 |
| WBGene00006051 | <a href="#">ssq-2</a>      | 13.36021458  | 0.787152491  | 0.058917653 | 0 |
| WBGene00008891 | <a href="#">clec-42</a>    | 16.38566652  | 0.782307115  | 0.047743381 | 0 |
| WBGene00007926 | <a href="#">C34C12.7</a>   | 9.753766901  | 0.77312541   | 0.07926429  | 0 |
| WBGene00016707 | <a href="#">C46E10.1</a>   | 12.55254435  | 0.772389022  | 0.061532467 | 0 |
| WBGene00013495 | <a href="#">clec-236</a>   | 8.340819224  | 0.769485074  | 0.092255335 | 0 |
| WBGene00013524 | <a href="#">Y73F8A.15</a>  | 10.48683573  | 0.762732781  | 0.072732405 | 0 |
| WBGene00015759 | <a href="#">C14C6.5</a>    | 8.372932764  | 0.752575682  | 0.089881969 | 0 |
| WBGene00012660 | <a href="#">Y39A1A.24</a>  | 9.186175112  | 0.74755848   | 0.081378645 | 0 |
| WBGene00003425 | <a href="#">msp-56</a>     | 12.12714997  | 0.742923952  | 0.061261216 | 0 |
| WBGene00003464 | <a href="#">msp-77</a>     | 9.141467887  | 0.736831557  | 0.080603199 | 0 |
| WBGene00015084 | <a href="#">B0244.9</a>    | 8.947491653  | 0.726690757  | 0.08121726  | 0 |
| WBGene00003466 | <a href="#">msp-81</a>     | 13.08329927  | 0.680787432  | 0.052034844 | 0 |
| WBGene00003429 | <a href="#">msp-31</a>     | 12.74209871  | 0.66142486   | 0.051908628 | 0 |
| WBGene00003548 | <a href="#">nas-30</a>     | 16.18227719  | 0.66116883   | 0.040857589 | 0 |
| WBGene00018470 | <a href="#">F45E4.5</a>    | 8.696724148  | 0.657546564  | 0.075608534 | 0 |
| WBGene00001832 | <a href="#">hcp-4</a>      | 10.9628524   | 0.631692283  | 0.057621161 | 0 |
| WBGene00003465 | <a href="#">msp-78</a>     | 10.49417562  | 0.626322863  | 0.059682903 | 0 |
| WBGene00000865 | <a href="#">cyb-1</a>      | 8.718106862  | 0.609471389  | 0.069908685 | 0 |
| WBGene00010010 | <a href="#">F53H4.5</a>    | -15.10995194 | -0.617356205 | 0.040857589 | 0 |
| WBGene00015894 | <a href="#">acdH-2</a>     | -15.41512724 | -0.629824932 | 0.040857589 | 0 |
| WBGene00010225 | <a href="#">ttr-31</a>     | -11.05507914 | -0.630881673 | 0.057067133 | 0 |
| WBGene00006634 | <a href="#">tsp-8</a>      | -12.76577654 | -0.644973948 | 0.050523675 | 0 |

|                |                            |              |              |             |   |
|----------------|----------------------------|--------------|--------------|-------------|---|
| WBGene00020859 | <a href="#">bath-25</a>    | -15.78979145 | -0.645132808 | 0.040857589 | 0 |
| WBGene00008577 | <a href="#">F08G2.5</a>    | -11.93106845 | -0.652350177 | 0.054676593 | 0 |
| WBGene00002039 | <a href="#">hum-6</a>      | -12.24590531 | -0.681667715 | 0.055664951 | 0 |
| WBGene00008532 | <a href="#">F02E9.9</a>    | -16.1063486  | -0.682259337 | 0.042359653 | 0 |
| WBGene00002012 | <a href="#">hsp-12.3</a>   | -14.69083524 | -0.703592152 | 0.047893271 | 0 |
| WBGene00015361 | <a href="#">C02H6.1</a>    | -16.01072027 | -0.719000934 | 0.04490747  | 0 |
| WBGene00020590 | <a href="#">T19H12.6</a>   | -17.63342296 | -0.720459147 | 0.040857589 | 0 |
| WBGene00003649 | <a href="#">nhr-59</a>     | -11.98639484 | -0.734852687 | 0.061307232 | 0 |
| WBGene00004155 | <a href="#">pqn-73</a>     | -13.63666483 | -0.755169513 | 0.055377874 | 0 |
| WBGene00020436 | <a href="#">T12A2.1</a>    | -14.27791959 | -0.782221992 | 0.054785432 | 0 |
| WBGene00001160 | <a href="#">efk-1</a>      | -11.87750553 | -0.783943191 | 0.066002343 | 0 |
| WBGene00015423 | <a href="#">C04E6.7</a>    | -11.13159219 | -0.798077142 | 0.071694788 | 0 |
| WBGene00012252 | <a href="#">W04E12.7</a>   | -11.26159188 | -0.805011569 | 0.071482929 | 0 |
| WBGene00012532 | <a href="#">crp-1</a>      | -12.34795167 | -0.814865025 | 0.065991919 | 0 |
| WBGene00018282 | <a href="#">F41D9.2</a>    | -11.1198026  | -0.83228022  | 0.074846672 | 0 |
| WBGene00009586 | <a href="#">F40F9.10</a>   | -13.97618304 | -0.83254667  | 0.059568959 | 0 |
| WBGene00019944 | <a href="#">R07G3.8</a>    | -13.00150404 | -0.834154341 | 0.064158296 | 0 |
| WBGene00009914 | <a href="#">F49H6.13</a>   | -16.23976758 | -0.838572732 | 0.051636991 | 0 |
| WBGene00004249 | <a href="#">pvf-1</a>      | -12.61930172 | -0.840309934 | 0.066589258 | 0 |
| WBGene00017243 | <a href="#">F08C6.5</a>    | -19.01910187 | -0.844252758 | 0.044389728 | 0 |
| WBGene00000726 | <a href="#">col-153</a>    | -11.79954496 | -0.844342448 | 0.071557204 | 0 |
| WBGene00018485 | <a href="#">F46C8.3</a>    | -15.85875626 | -0.846418769 | 0.05337233  | 0 |
| WBGene00001045 | <a href="#">dni-27</a>     | -16.33482221 | -0.849601196 | 0.052011659 | 0 |
| WBGene00004207 | <a href="#">ptb-1</a>      | -12.78517987 | -0.870443384 | 0.068082217 | 0 |
| WBGene00016996 | <a href="#">D1005.2</a>    | -19.66466113 | -0.891366502 | 0.045328343 | 0 |
| WBGene00019683 | <a href="#">K12H6.2</a>    | -13.10406082 | -0.895890649 | 0.068367406 | 0 |
| WBGene00010884 | <a href="#">M7.8</a>       | -12.84623945 | -0.902987725 | 0.070291989 | 0 |
| WBGene00012866 | <a href="#">Y45F10A.3</a>  | -11.4467229  | -0.914595024 | 0.079900163 | 0 |
| WBGene00008593 | <a href="#">clec-227</a>   | -12.69266806 | -0.928734006 | 0.073170905 | 0 |
|                | <a href="#">yk46h2</a>     | -19.21464695 | -0.94204126  | 0.049027248 | 0 |
| WBGene00011838 | <a href="#">T19C4.1</a>    | -20.7688647  | -0.943062605 | 0.045407518 | 0 |
| WBGene00017666 | <a href="#">F21E9.2</a>    | -14.47314876 | -0.954838695 | 0.065973114 | 0 |
| WBGene00015622 | <a href="#">C09B8.3</a>    | -16.86243343 | -0.980089518 | 0.058122662 | 0 |
| WBGene00010211 | <a href="#">F57G4.6</a>    | -20.12513238 | -0.986838875 | 0.04903515  | 0 |
| WBGene00004140 | <a href="#">pqn-55</a>     | -12.50018909 | -0.9924855   | 0.079397639 | 0 |
| WBGene00008270 | <a href="#">C53A5.13</a>   | -20.15169316 | -1.012986452 | 0.050268057 | 0 |
| WBGene00007170 | <a href="#">B0393.5</a>    | -16.39215097 | -1.024142182 | 0.062477596 | 0 |
| WBGene00013643 | <a href="#">Y105C5A.24</a> | -14.06763664 | -1.044773716 | 0.074267892 | 0 |
| WBGene00000521 | <a href="#">cky-1</a>      | -13.93902072 | -1.081195591 | 0.077566108 | 0 |
| WBGene00012255 | <a href="#">lpr-6</a>      | -12.5963528  | -1.081391067 | 0.085849538 | 0 |
| WBGene00017426 | <a href="#">F13C5.5</a>    | -12.77669209 | -1.082326968 | 0.084711047 | 0 |
| WBGene00011572 | <a href="#">T07C12.8</a>   | -21.65911184 | -1.082333377 | 0.049971272 | 0 |
| WBGene00021526 | <a href="#">Y41G9A.2</a>   | -17.49773024 | -1.105699161 | 0.063191005 | 0 |
| WBGene00022517 | <a href="#">ZC123.1</a>    | -16.5324538  | -1.11063105  | 0.067178839 | 0 |
| WBGene00017998 | <a href="#">F33D4.6</a>    | -12.04184169 | -1.113352769 | 0.092457018 | 0 |
| WBGene00009318 | <a href="#">F32B4.8</a>    | -27.4036171  | -1.119645723 | 0.040857589 | 0 |
| WBGene00008392 | <a href="#">D1086.5</a>    | -11.35876385 | -1.156968205 | 0.101856876 | 0 |
| WBGene00021121 | <a href="#">W09G12.7</a>   | -14.92757329 | -1.189878132 | 0.079710085 | 0 |
| WBGene00014008 | <a href="#">ZK596.3</a>    | -13.04729491 | -1.218282717 | 0.093374353 | 0 |
|                | <a href="#">yk385d5</a>    | -13.59308447 | -1.223072757 | 0.089977573 | 0 |
| WBGene00007898 | <a href="#">C33D9.3</a>    | -27.69659033 | -1.240265889 | 0.044780454 | 0 |
| WBGene00010033 | <a href="#">F54B11.10</a>  | -13.49899022 | -1.288671631 | 0.095464298 | 0 |
| WBGene00000233 | <a href="#">avr-15</a>     | -17.7944093  | -1.300895781 | 0.073106994 | 0 |
| WBGene00010209 | <a href="#">fbxa-191</a>   | -15.39750107 | -1.303482298 | 0.084655445 | 0 |
| WBGene00015797 | <a href="#">C15F1.8</a>    | -16.08537734 | -1.316780222 | 0.081861942 | 0 |
| WBGene00019550 | <a href="#">K09C4.5</a>    | -27.81221408 | -1.324633493 | 0.047627761 | 0 |
| WBGene00018464 | <a href="#">F45E1.3</a>    | -13.37048281 | -1.351293998 | 0.10106546  | 0 |

|                |                           |              |              |             |   |
|----------------|---------------------------|--------------|--------------|-------------|---|
| WBGene00019285 | <a href="#">cbn-1</a>     | -11.07539166 | -1.387271525 | 0.125257108 | 0 |
| WBGene00012917 | <a href="#">Y46G5A.29</a> | -26.02844241 | -1.394612093 | 0.053580313 | 0 |
| WBGene00015313 | <a href="#">C01G8.6</a>   | -13.24668651 | -1.401082292 | 0.10576851  | 0 |
| WBGene00018039 | <a href="#">F35D2.1</a>   | -15.48459246 | -1.426433254 | 0.092119522 | 0 |
| WBGene00011839 | <a href="#">T19C4.5</a>   | -15.1728011  | -1.448839484 | 0.095489256 | 0 |
| WBGene00020281 | <a href="#">T06A4.1</a>   | -15.07302373 | -1.458879816 | 0.096787469 | 0 |
| WBGene00003616 | <a href="#">nhr-17</a>    | -20.10248617 | -1.462762929 | 0.072765275 | 0 |
| WBGene00017560 | <a href="#">F18C5.5</a>   | -11.55071337 | -1.498313862 | 0.129716132 | 0 |
| WBGene00013348 | <a href="#">fbxa-106</a>  | -14.59521023 | -1.589869374 | 0.108930899 | 0 |
| WBGene00016029 | <a href="#">C24A1.2</a>   | -11.66447925 | -1.663047804 | 0.142573686 | 0 |
| WBGene00012324 | <a href="#">rhy-1</a>     | -11.16586213 | -1.792621349 | 0.160544822 | 0 |
| WBGene00015014 | <a href="#">bath-24</a>   | -11.61078956 | -1.807574736 | 0.155680604 | 0 |
| WBGene00007299 | <a href="#">C04F12.5</a>  | -13.85826768 | -1.808426432 | 0.130494408 | 0 |
| WBGene00016136 | <a href="#">C26B9.7</a>   | -11.38050627 | -1.833111934 | 0.161074727 | 0 |
| WBGene00019640 | <a href="#">dos-2</a>     | -15.20722726 | -1.833549249 | 0.120570911 | 0 |
| WBGene00018591 | <a href="#">F48B9.5</a>   | -34.88828074 | -1.954740849 | 0.056028581 | 0 |
| WBGene00016132 | <a href="#">C26B9.2</a>   | -18.90319636 | -2.0707579   | 0.109545384 | 0 |
| WBGene00011023 | <a href="#">R05A10.6</a>  | -12.186315   | -2.072537628 | 0.170070906 | 0 |
| WBGene00017219 | <a href="#">F07F6.7</a>   | -11.66484258 | -2.076905063 | 0.178048272 | 0 |
| WBGene00021731 | <a href="#">Y49G5A.1</a>  | -11.55326745 | -2.092898227 | 0.181152062 | 0 |
| WBGene00018668 | <a href="#">bath-2</a>    | -15.48939066 | -2.104875405 | 0.135891427 | 0 |
| WBGene00011950 | <a href="#">T23F6.2</a>   | -13.49099723 | -2.118012597 | 0.156994517 | 0 |
| WBGene00012085 | <a href="#">T27D12.1</a>  | -20.71086142 | -2.224815575 | 0.107422648 | 0 |
| WBGene00009891 | <a href="#">scl-10</a>    | -19.41511769 | -2.343486756 | 0.120704226 | 0 |
| WBGene00020232 | <a href="#">T05A8.6</a>   | -35.82574496 | -2.596123859 | 0.072465314 | 0 |
| WBGene00018659 | <a href="#">F52C6.2</a>   | -30.22625711 | -3.011735309 | 0.099639704 | 0 |
| WBGene00012564 | <a href="#">fbxa-107</a>  | -31.12513625 | -3.024883866 | 0.097184598 | 0 |
| WBGene00018667 | <a href="#">bath-7</a>    | -30.66486945 | -3.042426336 | 0.099215369 | 0 |
| WBGene00019141 | <a href="#">bath-5</a>    | -12.66125031 | -3.06012872  | 0.241692459 | 0 |
| WBGene00018902 | <a href="#">F55G1.6</a>   | -29.54762675 | -3.43145287  | 0.116132944 | 0 |
| WBGene00015843 | <a href="#">C16C8.5</a>   | -13.92048662 | -3.511738673 | 0.252271258 | 0 |
| WBGene00010295 | <a href="#">fbxa-193</a>  | -72.37942234 | -3.562821304 | 0.04922423  | 0 |
| WBGene00015842 | <a href="#">C16C8.4</a>   | -24.49790433 | -3.882522881 | 0.158483878 | 0 |
| WBGene00004044 | <a href="#">plk-3</a>     | -36.71416136 | -6.742970439 | 0.183661295 | 0 |
