# Supplementary material for: Transcription factors CEP‐1/p53 and CEH‐23 collaborate with AAK‐2/AMPK to modulate longevity in Caenorhabditis elegans
Source: PubMed Central journal article supplement (PMC5506430; doi:10.1111/acel.12619), 2017-05-30
Supplement: ACEL-16-814-s008.pdf [file ACEL-16-814-s008.pdf]

CEP- 1 and AAK-2 (identified by overlap between gene lists in Table S3 and S4)

| Wormbase ID    | Gene Name | Sequence Name | GO term | Enriched GOterm                         | Gene > Brief Description                                                                                                                                                                                                                                                        |
|----------------|-----------|---------------|---------|-----------------------------------------|---------------------------------------------------------------------------------------------------------------------------------------------------------------------------------------------------------------------------------------------------------------------------------|
| WBGene00001538 | gcy-12    | F08B1.2       | Kinase  | Dual/tyrosine and Ser/Thr Kinase        | gcy-12 encodes a membrane guanylyl cyclase; a gcy-12::GFP reporter is expressed in the PHA neurons as well as in a number of head sensory neurons including AFD, AWC, and ASE; when expressed in COS-M6 cells, GCY-12 exhibits temperature-dependent guanylyl cyclase activity. |
| WBGene00002212 | kin-31    | B0523.1       | Kinase  | Dual/tyrosine and Ser/Thr Kinase        | kin-31 encodes a predicted tyrosine protein kinase expressed in the nucleus and cytoplasm of body-wall muscle cells; the expression of kin-31 was experimentally verified by RT-PCR.                                                                                            |
| WBGene00010991 |           | R03D7.5       | Kinase  | Dual/tyrosine and Ser/Thr Kinase        |                                                                                                                                                                                                                                                                                 |
| WBGene00012172 |           | W01B6.5       | Kinase  | Dual/tyrosine and Ser/Thr Kinase        |                                                                                                                                                                                                                                                                                 |
| WBGene00012207 |           | W02B12.12     | Kinase  | Dual/tyrosine and Ser/Thr Kinase        |                                                                                                                                                                                                                                                                                 |
| WBGene00017672 |           | F21F3.2       | Kinase  | Dual/tyrosine and Ser/Thr Kinase        |                                                                                                                                                                                                                                                                                 |
| WBGene00017737 |           | F23C8.8       | Kinase  | Dual/tyrosine and Ser/Thr Kinase        |                                                                                                                                                                                                                                                                                 |
| WBGene00022634 |           | ZC581.7       | Kinase  | Dual/tyrosine and Ser/Thr Kinase        |                                                                                                                                                                                                                                                                                 |
| WBGene00007977 | gska-3    | C36B1.10      | Kinase  | Dual/tyrosine and Ser/Thr Kinase        |                                                                                                                                                                                                                                                                                 |
| WBGene00007448 |           | C08F8.6       | Kinase  | Dual/tyrosine and Ser/Thr Kinase (TTBK) |                                                                                                                                                                                                                                                                                 |
| WBGene00007563 |           | C14A4.13      | Kinase  | Dual/tyrosine and Ser/Thr Kinase (TTBK) |                                                                                                                                                                                                                                                                                 |
| WBGene00007777 |           | C27D8.1       | Kinase  | Dual/tyrosine and Ser/Thr Kinase (TTBK) |                                                                                                                                                                                                                                                                                 |
| WBGene00009324 |           | F32B6.10      | Kinase  | Dual/tyrosine and Ser/Thr Kinase (TTBK) |                                                                                                                                                                                                                                                                                 |

|                |       |           |        |                                         |                                                                                                                                                                                                                                                                                                                                                                                                                                                                             |
|----------------|-------|-----------|--------|-----------------------------------------|-----------------------------------------------------------------------------------------------------------------------------------------------------------------------------------------------------------------------------------------------------------------------------------------------------------------------------------------------------------------------------------------------------------------------------------------------------------------------------|
| WBGene00009402 |       | F35C11.3  | Kinase | Dual/tyrosine and Ser/Thr Kinase (TTBK) |                                                                                                                                                                                                                                                                                                                                                                                                                                                                             |
| WBGene00012169 |       | W01B6.2   | Kinase | Dual/tyrosine and Ser/Thr Kinase (TTBK) |                                                                                                                                                                                                                                                                                                                                                                                                                                                                             |
| WBGene00012637 |       | Y38H8A.3  | Kinase | Dual/tyrosine and Ser/Thr Kinase (TTBK) |                                                                                                                                                                                                                                                                                                                                                                                                                                                                             |
| WBGene00014007 |       | ZK596.2   | Kinase | Dual/tyrosine and Ser/Thr Kinase (TTBK) |                                                                                                                                                                                                                                                                                                                                                                                                                                                                             |
| WBGene00016541 |       | C39H7.1   | Kinase | Dual/tyrosine and Ser/Thr Kinase (TTBK) |                                                                                                                                                                                                                                                                                                                                                                                                                                                                             |
| WBGene00016963 |       | C56C10.6  | Kinase | Dual/tyrosine and Ser/Thr Kinase (TTBK) |                                                                                                                                                                                                                                                                                                                                                                                                                                                                             |
| WBGene00018178 |       | F38E1.3   | Kinase | Dual/tyrosine and Ser/Thr Kinase (TTBK) |                                                                                                                                                                                                                                                                                                                                                                                                                                                                             |
| WBGene00018301 |       | F41G3.5   | Kinase | Dual/tyrosine and Ser/Thr Kinase (TTBK) |                                                                                                                                                                                                                                                                                                                                                                                                                                                                             |
| WBGene00019642 |       | K11C4.1   | Kinase | Dual/tyrosine and Ser/Thr Kinase (TTBK) |                                                                                                                                                                                                                                                                                                                                                                                                                                                                             |
| WBGene00021639 |       | Y47G6A.13 | Kinase | Dual/tyrosine and Ser/Thr Kinase (TTBK) |                                                                                                                                                                                                                                                                                                                                                                                                                                                                             |
| WBGene00022707 |       | ZK354.6   | Kinase | Dual/tyrosine and Ser/Thr Kinase (TTBK) |                                                                                                                                                                                                                                                                                                                                                                                                                                                                             |
| WBGene00015634 |       | C09D4.3   | Kinase | Dual/tyrosine and Ser/Thr Kinase (TTBK) |                                                                                                                                                                                                                                                                                                                                                                                                                                                                             |
| WBGene00002193 | kin-5 | T13H10.1  | Kinase | Dual/tyrosine and Ser/Thr Kinase(FER)   | <p>kin-5 encodes a predicted protein tyrosine kinase that is most closely related to the non-receptor tyrosine kinases Fes/Fps and Fer that contain an SH2 domain and a tyrosine kinase domain (OMIM:190030, murine Fes appears to be required for hemopoietic homeostasis); as loss of kin-5 activity via large-scale RNAi screens does not result in any obvious abnormalities, the precise role of kin-5 in C. elegans development and/or behavior is not yet known.</p> |

|                |        |          |        |                                       |                                                                                                                                                                                                                                                                                                                                                                                                                                                                                                                                                   |
|----------------|--------|----------|--------|---------------------------------------|---------------------------------------------------------------------------------------------------------------------------------------------------------------------------------------------------------------------------------------------------------------------------------------------------------------------------------------------------------------------------------------------------------------------------------------------------------------------------------------------------------------------------------------------------|
| WBGene00002204 | kin-21 | W08D2.8  | Kinase | Dual/tyrosine and Ser/Thr Kinase(FER) |                                                                                                                                                                                                                                                                                                                                                                                                                                                                                                                                                   |
| WBGene00004962 | spe-8  | F53G12.6 | Kinase | Dual/tyrosine and Ser/Thr Kinase(FER) | spe-8 is predicted to encode a non-receptor tyrosine kinase with a SH2 domain; spe-8 is required for hermaphrodite spermatogenesis or sperm activation but not for male-derived sperm activation (sperm activation is the morphogenesis of a round non-motile spermatid to an amoeboid crawling sperm); however, mutant hermaphrodite spe-8 spermatids can transactivate and form functional sperm during mating with males; genetic and phenotypic evidence suggests that spe-8 acts in a common pathway with spe-12, spe-19, spe-27 and spe-29. |
| WBGene00009160 |        | F26E4.5  | Kinase | Dual/tyrosine and Ser/Thr Kinase(FER) | F26E4.5 encodes an SH2 domain-containing tyrosine kinase related to the vertebrate FER non-receptor protein tyrosine kinase; loss of F26E4.5 activity in an RNAi-hypersensitive strain results in axon guidance defects indicating that F26E4.5 likely plays a role in regulation of axon navigation.                                                                                                                                                                                                                                             |
| WBGene00010712 |        | K09B11.5 | Kinase | Dual/tyrosine and Ser/Thr Kinase(FER) |                                                                                                                                                                                                                                                                                                                                                                                                                                                                                                                                                   |
| WBGene00012010 |        | T25B9.4  | Kinase | Dual/tyrosine and Ser/Thr Kinase(FER) |                                                                                                                                                                                                                                                                                                                                                                                                                                                                                                                                                   |
| WBGene00015994 |        | C18H7.4  | Kinase | Dual/tyrosine and Ser/Thr Kinase(FER) |                                                                                                                                                                                                                                                                                                                                                                                                                                                                                                                                                   |
| WBGene00016085 |        | C25A8.5  | Kinase | Dual/tyrosine and Ser/Thr Kinase(FER) |                                                                                                                                                                                                                                                                                                                                                                                                                                                                                                                                                   |
| WBGene00016416 |        | C34F11.5 | Kinase | Dual/tyrosine and Ser/Thr Kinase(FER) |                                                                                                                                                                                                                                                                                                                                                                                                                                                                                                                                                   |
| WBGene00016954 |        | C55C3.4  | Kinase | Dual/tyrosine and Ser/Thr Kinase(FER) |                                                                                                                                                                                                                                                                                                                                                                                                                                                                                                                                                   |

|                |        |           |        |                                                     |  |
|----------------|--------|-----------|--------|-----------------------------------------------------|--|
| WBGene00019081 |        | F59A3.8   | Kinase | Dual/tyrosine and Ser/Thr Kinase(FER)               |  |
| WBGene00022780 |        | ZK622.1   | Kinase | Dual/tyrosine and Ser/Thr Kinase(FER)               |  |
| WBGene00018999 |        | F57B9.8   | Kinase | Dual/tyrosine and Ser/Thr Kinase(FER)               |  |
| WBGene00016462 |        | C35E7.10  | Kinase | Dual/tyrosine and Ser/Thr Kinase(FER)               |  |
| WBGene00010366 |        | H05L14.1  | Kinase | non-receptor serine/threonine protein kinase        |  |
| WBGene00015629 |        | C09B9.4   | Kinase | non-receptor serine/threonine protein kinase        |  |
| WBGene00007269 |        | C03C10.2  | Kinase | non-receptor serine/threonine protein kinase (TTBK) |  |
| WBGene00007335 |        | C05C12.1  | Kinase | non-receptor serine/threonine protein kinase (TTBK) |  |
| WBGene00008423 |        | D2045.5   | Kinase | non-receptor serine/threonine protein kinase (TTBK) |  |
| WBGene00011191 |        | R10D12.10 | Kinase | non-receptor serine/threonine protein kinase (TTBK) |  |
| WBGene00013979 |        | ZK507.3   | Kinase | non-receptor serine/threonine protein kinase (TTBK) |  |
| WBGene00017050 |        | D2024.1   | Kinase | non-receptor serine/threonine protein kinase (TTBK) |  |
| WBGene00017802 |        | F26A1.3   | Kinase | non-receptor serine/threonine protein kinase (TTBK) |  |
| WBGene00018004 |        | F33D11.7  | Kinase | non-receptor serine/threonine protein kinase (TTBK) |  |
| WBGene00018122 | ttbk-2 | F36H12.8  | Kinase | non-receptor serine/threonine protein kinase (TTBK) |  |

|                |        |           |                       |                                                     |                                                                          |
|----------------|--------|-----------|-----------------------|-----------------------------------------------------|--------------------------------------------------------------------------|
| WBGene00019086 |        | F59A6.4   | Kinase                | non-receptor serine/threonine protein kinase (TTBK) |                                                                          |
| WBGene00020223 |        | T05A7.6   | Kinase                | non-receptor serine/threonine protein kinase (TTBK) |                                                                          |
| WBGene00020580 |        | T19D12.5  | Kinase                | non-receptor serine/threonine protein kinase (TTBK) |                                                                          |
| WBGene00022108 |        | Y71F9AL.2 | Kinase                | non-receptor serine/threonine protein kinase (TTBK) |                                                                          |
| WBGene00022229 |        | Y73B6A.2  | Kinase                | non-receptor serine/threonine protein kinase (TTBK) |                                                                          |
| WBGene00022632 |        | ZC581.2   | Kinase                | non-receptor serine/threonine protein kinase (TTBK) |                                                                          |
| WBGene00022705 |        | ZK354.2   | Kinase                | non-receptor serine/threonine protein kinase (TTBK) |                                                                          |
| WBGene00004901 | snf-2  | F55H12.1  | transmitter symporter |                                                     |                                                                          |
| WBGene00004904 | snf-5  | Y46G5A.30 | transmitter symporter |                                                     |                                                                          |
| WBGene00004906 | snf-7  | ZK1010.9  | transmitter symporter |                                                     |                                                                          |
| WBGene00004908 | snf-9  | C49C3.1   | transmitter symporter |                                                     |                                                                          |
| WBGene00004909 | snf-10 | Y32F6A.2  | transmitter symporter |                                                     | snf-10 encodes a member of the sodium:neurotransmitter symporter family. |
| WBGene00018980 |        | F56F4.3   | transmitter symporter |                                                     |                                                                          |
| WBGene00009129 |        | F25H5.7   | Phosphatases          | Dual specific                                       |                                                                          |
| WBGene00009492 |        | F36H1.3   | Phosphatases          | Dual specific                                       |                                                                          |
| WBGene00009548 |        | F38H4.4   | Phosphatases          | Dual specific                                       |                                                                          |
| WBGene00010072 |        | F54F12.1  | Phosphatases          | Dual specific                                       |                                                                          |
| WBGene00010634 |        | K07F5.6   | Phosphatases          | Dual specific                                       |                                                                          |
| WBGene00010869 |        | M05B5.1   | Phosphatases          | Dual specific                                       |                                                                          |
| WBGene00011918 |        | T22C1.8   | Phosphatases          | Dual specific                                       |                                                                          |
| WBGene00012138 |        | T28F4.3   | Phosphatases          | Dual specific                                       |                                                                          |
| WBGene00012679 |        | Y39B6A.18 | Phosphatases          | Dual specific                                       |                                                                          |
| WBGene00012689 |        | Y39B6A.30 | Phosphatases          | Dual specific                                       |                                                                          |
| WBGene00013586 |        | Y80D3A.8  | Phosphatases          | Dual specific                                       |                                                                          |
| WBGene00015026 |        | B0207.1   | Phosphatases          | Dual specific                                       |                                                                          |
| WBGene00015929 |        | C17H12.3  | Phosphatases          | Dual specific                                       |                                                                          |
| WBGene00018526 |        | F47B3.2   | Phosphatases          | Dual specific                                       |                                                                          |
| WBGene00019586 |        | K09F6.3   | Phosphatases          | Dual specific                                       |                                                                          |
| WBGene00009401 |        | F35C11.2  | Phosphatases          | Dual specific                                       |                                                                          |
| WBGene00013304 |        | Y57G11C.6 | Phosphatases          | Dual specific                                       |                                                                          |
| WBGene00016053 |        | C24D10.1  | Phosphatases          | Dual specific                                       |                                                                          |
| WBGene00015931 |        | C17H12.5  | Phosphatases          | Dual specific                                       |                                                                          |

|                |          |            |                |                                                  |                                                  |
|----------------|----------|------------|----------------|--------------------------------------------------|--------------------------------------------------|
| WBGene00022090 |          | Y69A2AR.19 | Phosphatases   | Dual specific                                    |                                                  |
| WBGene00007610 |          | C15H7.3    | Phosphatases   | Dual specific                                    |                                                  |
| WBGene00010992 |          | R03D7.8    | Phosphatases   | S/Thr specific/PPP1CA                            |                                                  |
| WBGene00012741 |          | Y40H4A.2   | Phosphatases   | S/Thr specific/PPP1CA                            |                                                  |
| WBGene00016010 |          | C23G10.1   | Phosphatases   | S/Thr specific/PPP1CA                            |                                                  |
| WBGene00021113 | gsp-3    | W09C3.6    | Phosphatases   | S/Thr specific/PPP1CA                            |                                                  |
| WBGene00008124 |          | C47A4.3    | Phosphatases   | S/Thr specific/PPP1CB                            |                                                  |
| WBGene00016398 |          | C34D4.2    | Phosphatases   | S/Thr specific/PPP1CB                            |                                                  |
| WBGene00020187 | gsp-4    | T03F1.5    | Phosphatases   | S/Thr specific/PPP1CB                            |                                                  |
| WBGene00009948 |          | F52H3.6    | Phosphatases   | S/Thr specific/PPP1CC                            |                                                  |
| WBGene00010265 |          | F58G1.3    | Phosphatases   | S/Thr specific/PPP1CC                            |                                                  |
| WBGene00011133 |          | R08A2.2    | Phosphatases   | S/Thr specific/PPP1CC                            |                                                  |
| WBGene00014158 |          | ZK938.1    | Phosphatases   | S/Thr specific/PPP1CC                            |                                                  |
| WBGene00000389 | cdc-25.4 | R05H5.2    | Phosphatases   | tyrosine specific                                | a homolog of dual specificity phosphatase Cdc25. |
| WBGene00016742 |          | C48B6.4    | Phosphatases   | tyrosine specific                                |                                                  |
| WBGene00018347 |          | F42C5.5    | Phosphatases   | tyrosine specific                                |                                                  |
| WBGene00021207 |          | Y18H1A.1   | Phosphatases   | tyrosine specific                                |                                                  |
| WBGene00015084 |          | B0244.9    | Structural/MSP | B0244.9                                          |                                                  |
| WBGene00007239 |          | C01G10.14  | Structural/MSP | C01G10.14                                        |                                                  |
| WBGene00015696 |          | C10H11.7   | Structural/MSP | C10H11.7                                         |                                                  |
| WBGene00007559 |          | C14A4.8    | Structural/MSP | C14A4.8                                          |                                                  |
| WBGene00016461 |          | C35E7.9    | Structural/MSP | C35E7.9                                          |                                                  |
| WBGene00007987 |          | C36H8.1    | Structural/MSP | C36H8.1                                          |                                                  |
| WBGene00000696 | col-122  | T05A1.2    | Structural/MSP | COLlagen                                         |                                                  |
| WBGene00000707 | col-133  | F52B11.4   | Structural/MSP | COLlagen                                         |                                                  |
| WBGene00000710 | col-137  | Y51H4A.9   | Structural/MSP | COLlagen                                         |                                                  |
| WBGene00021006 | dct-9    | W03F11.3   | Structural/MSP | DAF-16/FOXO Controlled, germline Tumor affecting |                                                  |
| WBGene00009031 |          | F21H7.5    | Structural/MSP | F21H7.5                                          |                                                  |
| WBGene00009470 |          | F36D3.4    | Structural/MSP | F36D3.4                                          |                                                  |
| WBGene00018119 |          | F36H12.3   | Structural/MSP | F36H12.3                                         |                                                  |
| WBGene00018336 |          | F42A9.7    | Structural/MSP | F42A9.7                                          |                                                  |
| WBGene00009682 | msd-2    | F44D12.5   | Structural/MSP | F44D12.3;<br>F44D12.5;<br>F44D12.7;<br>C35D10.11 |                                                  |
| WBGene00009959 |          | F53B6.4    | Structural/MSP | F53B6.4                                          |                                                  |

|                |        |          |                |                     |                                                                                                                                                                                                                                                                                                                                                                                                                                                                                                                                                                                                                                                                                                                                                                                                                                                                               |
|----------------|--------|----------|----------------|---------------------|-------------------------------------------------------------------------------------------------------------------------------------------------------------------------------------------------------------------------------------------------------------------------------------------------------------------------------------------------------------------------------------------------------------------------------------------------------------------------------------------------------------------------------------------------------------------------------------------------------------------------------------------------------------------------------------------------------------------------------------------------------------------------------------------------------------------------------------------------------------------------------|
| WBGene00010091 | ssp-35 | F55C5.1  | Structural/MSP | F55C5.1             |                                                                                                                                                                                                                                                                                                                                                                                                                                                                                                                                                                                                                                                                                                                                                                                                                                                                               |
| WBGene00010114 |        | F55D12.6 | Structural/MSP | F55D12.6            |                                                                                                                                                                                                                                                                                                                                                                                                                                                                                                                                                                                                                                                                                                                                                                                                                                                                               |
| WBGene00010254 |        | F58E6.5  | Structural/MSP | F58E6.5             |                                                                                                                                                                                                                                                                                                                                                                                                                                                                                                                                                                                                                                                                                                                                                                                                                                                                               |
| WBGene00019410 |        | K05F1.9  | Structural/MSP | K05F1.9             |                                                                                                                                                                                                                                                                                                                                                                                                                                                                                                                                                                                                                                                                                                                                                                                                                                                                               |
| WBGene00019431 |        | K06A5.3  | Structural/MSP | K06A5.3             |                                                                                                                                                                                                                                                                                                                                                                                                                                                                                                                                                                                                                                                                                                                                                                                                                                                                               |
| WBGene00003424 | msp-3  | F26G1.7  | Structural/MSP | Major Sperm Protein | msp-3 encodes a protein that belongs to a family of proteins called the Major Sperm Proteins (MSPs) that is conserved in nematodes; msp-3 is similar in nucleotide sequence to the msp genes from the nematode <i>Onchocerca volvulus</i> ; the msp gene family consists of closely related, small, basic proteins that make up 15% of sperm protein; this multigene family consists of over fifty genes, including many pseudogenes; MSPs are involved in both extracellular signaling and cytoskeletal functions during reproduction-MSP antagonizes Eph/ephrin signaling, in part, by binding VAB-1 Eph receptor tyrosine kinase on oocytes and sheath cells to promote oocyte maturation and MAPK activation; MSP proteins assemble into fibrous networks that drive movement of the <i>C. elegans</i> sperm; msp genes are expressed only in late primary spermatocytes. |
| WBGene00003431 | msp-33 | R05F9.8  | Structural/MSP | Major Sperm Protein | msp-33 encodes a protein that belongs to a family of proteins called the Major Sperm Proteins (MSPs) that is conserved in nematodes; msp-33 has a <i>C. briggsae</i> homolog as predicted by the Wobble Aware Bulk Aligner (WABA); the MSP family consists of closely related, small, basic proteins that make up 15% of sperm protein; this multigene family consists of over fifty genes, including many pseudogenes; MSPs are involved in both extracellular signaling and cytoskeletal functions during reproduction-MSP antagonizes Eph/ephrin signaling, in part, by binding VAB-1 Eph receptor tyrosine kinase on oocytes and sheath cells to promote oocyte maturation and MAPK activation; MSPs assemble into fibrous networks that drive movement of the <i>C. elegans</i> sperm; msp genes are expressed only in late primary spermatocytes.                       |
| WBGene00003434 | msp-38 | K08F4.8  | Structural/MSP | Major Sperm Protein | msp-38 encodes a member of the major sperm protein family; msp-38 has a <i>C. briggsae</i> homolog as predicted by the Wobble Bulk Aware Bulk Aligner (WABA).                                                                                                                                                                                                                                                                                                                                                                                                                                                                                                                                                                                                                                                                                                                 |

|                |        |          |                |                                                                  |                                                                                                                                                                                                                                                                                                                                                                                                                                                                                                                                                                                                                                                                                                                                                 |
|----------------|--------|----------|----------------|------------------------------------------------------------------|-------------------------------------------------------------------------------------------------------------------------------------------------------------------------------------------------------------------------------------------------------------------------------------------------------------------------------------------------------------------------------------------------------------------------------------------------------------------------------------------------------------------------------------------------------------------------------------------------------------------------------------------------------------------------------------------------------------------------------------------------|
| WBGene00003465 | msp-78 | T13F2.11 | Structural/MSP | Major Sperm Protein                                              | msp-78 encodes a protein that belongs to a family of proteins called the Major Sperm Proteins (MSPs) that is conserved in nematodes; this family consists of closely related, small, basic proteins that make up 15% of sperm protein; this multigene family consists of over fifty genes, including many pseudogenes; MSPs are involved in both extracellular signaling and cytoskeletal functions during reproduction-MSP antagonizes Eph/ephrin signaling, in part, by binding VAB-1 Eph receptor tyrosine kinase on oocytes and sheath cells to promote oocyte maturation and MAPK activation; MSPs assemble into fibrous networks that drive movement of the C. elegans sperm; msp genes are expressed only in late primary spermatocytes. |
| WBGene00022875 |        | ZK1248.4 | Structural/MSP | Major Sperm Protein                                              |                                                                                                                                                                                                                                                                                                                                                                                                                                                                                                                                                                                                                                                                                                                                                 |
| WBGene00011134 | ssp-33 | R08A2.3  | Structural/MSP | R08A2.3                                                          |                                                                                                                                                                                                                                                                                                                                                                                                                                                                                                                                                                                                                                                                                                                                                 |
| WBGene00006039 | ssp-10 | K07F5.9  | Structural/MSP | Sperm-Specific family, class P                                   |                                                                                                                                                                                                                                                                                                                                                                                                                                                                                                                                                                                                                                                                                                                                                 |
| WBGene00006047 | ssp-19 | C55C2.2  | Structural/MSP | Sperm-Specific family, class P                                   | ssp-19 encodes a member of the C. elegans sperm-specific protein (ssp) family; loss of ssp-19 function via RNAi has been reported to result in a moderate increase of fat content; in situ hybridization experiments detect ssp-19 mRNA in the spermatheca; the SSP-19 crystal structure has been determined and reveals monomer-monomer interactions between SSP-19 molecules to be strikingly different from equivalent interactions between MSP (major sperm protein) monomers.                                                                                                                                                                                                                                                              |
| WBGene00006048 | ssp-31 | ZK1225.6 | Structural/MSP | Sperm-Specific family, class P                                   |                                                                                                                                                                                                                                                                                                                                                                                                                                                                                                                                                                                                                                                                                                                                                 |
| WBGene00006049 | ssp-32 | F32B6.7  | Structural/MSP | Sperm-Specific family, class P                                   |                                                                                                                                                                                                                                                                                                                                                                                                                                                                                                                                                                                                                                                                                                                                                 |
| WBGene00013858 | ssp-34 | ZC168.6  | Structural/MSP | Sperm-specific protein ZC168.6                                   |                                                                                                                                                                                                                                                                                                                                                                                                                                                                                                                                                                                                                                                                                                                                                 |
| WBGene00009550 |        | F38H4.6  | Structural/MSP | Uncharacterized protein R05D3.5; Uncharacterized protein ZC262.1 |                                                                                                                                                                                                                                                                                                                                                                                                                                                                                                                                                                                                                                                                                                                                                 |



|                |        |           |                |                                     |                                                                                                                                                                                                                                                                                                                                                                                                                                                                                                                                                                                                                                                                                                                                                 |
|----------------|--------|-----------|----------------|-------------------------------------|-------------------------------------------------------------------------------------------------------------------------------------------------------------------------------------------------------------------------------------------------------------------------------------------------------------------------------------------------------------------------------------------------------------------------------------------------------------------------------------------------------------------------------------------------------------------------------------------------------------------------------------------------------------------------------------------------------------------------------------------------|
| WBGene00014246 |        | ZK1307.3  | Structural/MSP | Uncharacterized protein<br>ZK1307.3 |                                                                                                                                                                                                                                                                                                                                                                                                                                                                                                                                                                                                                                                                                                                                                 |
| WBGene00013290 |        | Y57G11A.2 | Structural/MSP | Y57G11A.2                           |                                                                                                                                                                                                                                                                                                                                                                                                                                                                                                                                                                                                                                                                                                                                                 |
| WBGene00022884 |        | ZK1248.17 | Structural/MSP | ZK1248.17                           |                                                                                                                                                                                                                                                                                                                                                                                                                                                                                                                                                                                                                                                                                                                                                 |
| WBGene00022760 |        | ZK546.3   | Structural/MSP | ZK546.3                             |                                                                                                                                                                                                                                                                                                                                                                                                                                                                                                                                                                                                                                                                                                                                                 |
| WBGene00003425 | msp-10 | K07F5.2   | Structural/MSP |                                     | msp-10 encodes a protein that belongs to a family of proteins called the Major Sperm Proteins (MSPs) that is conserved in nematodes; this family consists of closely related, small, basic proteins that make up 15% of sperm protein; this multigene family consists of over fifty genes, including many pseudogenes; MSPs are involved in both extracellular signaling and cytoskeletal functions during reproduction-MSP antagonizes Eph/ephrin signaling, in part, by binding VAB-1 Eph receptor tyrosine kinase on oocytes and sheath cells to promote oocyte maturation and MAPK activation; MSPs assemble into fibrous networks that drive movement of the C. elegans sperm; msp genes are expressed only in late primary spermatocytes. |
| WBGene00003429 | msp-31 | R05F9.13  | Structural/MSP |                                     | msp-31 encodes a member of the major sperm protein family; msp-31 has a C. briggsae homolog as predicted by the Wobble Aware Bulk Aligner (WABA); expression is enriched in sperm.                                                                                                                                                                                                                                                                                                                                                                                                                                                                                                                                                              |
| WBGene00003438 | msp-45 | F58A6.8   | Structural/MSP |                                     | msp-45 encodes a member of the major sperm protein family.                                                                                                                                                                                                                                                                                                                                                                                                                                                                                                                                                                                                                                                                                      |

|                |        |          |                |                                                                                                                                                                                                                                                                                                                                                                                                                                                                                                                                                                                                                                                                                                                                                        |
|----------------|--------|----------|----------------|--------------------------------------------------------------------------------------------------------------------------------------------------------------------------------------------------------------------------------------------------------------------------------------------------------------------------------------------------------------------------------------------------------------------------------------------------------------------------------------------------------------------------------------------------------------------------------------------------------------------------------------------------------------------------------------------------------------------------------------------------------|
| WBGene00003442 | msp-49 | C34F11.6 | Structural/MSP | <p>msp-49 encodes a protein that belongs to a family of proteins called the Major Sperm Proteins (MSPs) that is conserved in nematodes; this family consists of closely related, small, basic proteins that make up 15% of sperm protein; this multigene family consists of over fifty genes, including many pseudogenes; MSPs are involved in both extracellular signaling and cytoskeletal functions during reproduction-MSP antagonizes Eph/ephrin signaling, in part, by binding VAB-1 Eph receptor tyrosine kinase on oocytes and sheath cells to promote oocyte maturation and MAPK activation; MSPs assemble into fibrous networks that drive movement of the C. elegans sperm; msp genes are expressed only in late primary spermatocytes.</p> |
| WBGene00003443 | msp-50 | C34F11.4 | Structural/MSP | <p>msp-50 encodes a protein that belongs to a family of proteins called the Major Sperm Proteins (MSPs) that is conserved in nematodes; this family consists of closely related, small, basic proteins that make up 15% of sperm protein; this multigene family consists of over fifty genes, including many pseudogenes; MSPs are involved in both extracellular signaling and cytoskeletal functions during reproduction-MSP antagonizes Eph/ephrin signaling, in part, by binding VAB-1 Eph receptor tyrosine kinase on oocytes and sheath cells to promote oocyte maturation and MAPK activation; MSPs assemble into fibrous networks that drive movement of the C. elegans sperm; msp genes are expressed only in late primary spermatocytes.</p> |

|                |        |          |                |                                                                                                                                                                                                                                                                                                                                                                                                                                                                                                                                                                                                                                                                                                                                                        |
|----------------|--------|----------|----------------|--------------------------------------------------------------------------------------------------------------------------------------------------------------------------------------------------------------------------------------------------------------------------------------------------------------------------------------------------------------------------------------------------------------------------------------------------------------------------------------------------------------------------------------------------------------------------------------------------------------------------------------------------------------------------------------------------------------------------------------------------------|
| WBGene00003456 | msp-63 | K05F1.7  | Structural/MSP | <p>msp-63 encodes a protein that belongs to a family of proteins called the Major Sperm Proteins (MSPs) that is conserved in nematodes; this family consists of closely related, small, basic proteins that make up 15% of sperm protein; this multigene family consists of over fifty genes, including many pseudogenes; MSPs are involved in both extracellular signaling and cytoskeletal functions during reproduction-MSP antagonizes Eph/ephrin signaling, in part, by binding VAB-1 Eph receptor tyrosine kinase on oocytes and sheath cells to promote oocyte maturation and MAPK activation; MSPs assemble into fibrous networks that drive movement of the C. elegans sperm; msp genes are expressed only in late primary spermatocytes.</p> |
| WBGene00003462 | msp-74 | F09C12.7 | Structural/MSP | <p>msp-74 encodes a protein that belongs to a family of proteins called the Major Sperm Proteins (MSPs) that is conserved in nematodes; this family consists of closely related, small, basic proteins that make up 15% of sperm protein; this multigene family consists of over fifty genes, including many pseudogenes; MSPs are involved in both extracellular signaling and cytoskeletal functions during reproduction-MSP antagonizes Eph/ephrin signaling, in part, by binding VAB-1 Eph receptor tyrosine kinase on oocytes and sheath cells to promote oocyte maturation and MAPK activation; MSPs assemble into fibrous networks that drive movement of the C. elegans sperm; msp genes are expressed only in late primary spermatocytes.</p> |

|                |        |          |                |  |                                                                                                                                                                                                                                                                                                                                                                                                                                                                                                                                                                                                                                                                                                                                                 |
|----------------|--------|----------|----------------|--|-------------------------------------------------------------------------------------------------------------------------------------------------------------------------------------------------------------------------------------------------------------------------------------------------------------------------------------------------------------------------------------------------------------------------------------------------------------------------------------------------------------------------------------------------------------------------------------------------------------------------------------------------------------------------------------------------------------------------------------------------|
| WBGene00003463 | msp-76 | ZK1251.6 | Structural/MSP |  | msp-76 encodes a protein that belongs to a family of proteins called the Major Sperm Proteins (MSPs) that is conserved in nematodes; this family consists of closely related, small, basic proteins that make up 15% of sperm protein; this multigene family consists of over fifty genes, including many pseudogenes; MSPs are involved in both extracellular signaling and cytoskeletal functions during reproduction-MSP antagonizes Eph/ephrin signaling, in part, by binding VAB-1 Eph receptor tyrosine kinase on oocytes and sheath cells to promote oocyte maturation and MAPK activation; MSPs assemble into fibrous networks that drive movement of the C. elegans sperm; msp genes are expressed only in late primary spermatocytes. |
| WBGene00003464 | msp-77 | F32B6.6  | Structural/MSP |  | msp-77 encodes a protein that belongs to a family of proteins called the Major Sperm Proteins (MSPs) that is conserved in nematodes; this family consists of closely related, small, basic proteins that make up 15% of sperm protein; this multigene family consists of over fifty genes, including many pseudogenes; MSPs are involved in both extracellular signaling and cytoskeletal functions during reproduction-MSP antagonizes Eph/ephrin signaling, in part, by binding VAB-1 Eph receptor tyrosine kinase on oocytes and sheath cells to promote oocyte maturation and MAPK activation; MSPs assemble into fibrous networks that drive movement of the C. elegans sperm; msp genes are expressed only in late primary spermatocytes. |
| WBGene00003466 | msp-79 | T13F2.10 | Structural/MSP |  | msp-79 encodes a member of the major sperm protein family.                                                                                                                                                                                                                                                                                                                                                                                                                                                                                                                                                                                                                                                                                      |

|                |         |         |                |  |                                                                                                                                                                                                                                                                                                                                                                                                                                                                                                                                                                                                                                                                                                                                                  |
|----------------|---------|---------|----------------|--|--------------------------------------------------------------------------------------------------------------------------------------------------------------------------------------------------------------------------------------------------------------------------------------------------------------------------------------------------------------------------------------------------------------------------------------------------------------------------------------------------------------------------------------------------------------------------------------------------------------------------------------------------------------------------------------------------------------------------------------------------|
| WBGene00003469 | msp-142 | K05F1.2 | Structural/MSP |  | msp-142 encodes a protein that belongs to a family of proteins called the Major Sperm Proteins (MSPs) that is conserved in nematodes; this family consists of closely related, small, basic proteins that make up 15% of sperm protein; this multigene family consists of over fifty genes, including many pseudogenes; MSPs are involved in both extracellular signaling and cytoskeletal functions during reproduction-MSP antagonizes Eph/ephrin signaling, in part, by binding VAB-1 Eph receptor tyrosine kinase on oocytes and sheath cells to promote oocyte maturation and MAPK activation; MSPs assemble into fibrous networks that drive movement of the C. elegans sperm; msp genes are expressed only in late primary spermatocytes. |
| WBGene00003470 | msp-152 | ZK546.6 | Structural/MSP |  | msp-152 encodes a protein that belongs to a family of proteins called the Major Sperm Proteins (MSPs) that is conserved in nematodes; this family consists of closely related, small, basic proteins that make up 15% of sperm protein; this multigene family consists of over fifty genes, including many pseudogenes; MSPs are involved in both extracellular signaling and cytoskeletal functions during reproduction-MSP antagonizes Eph/ephrin signaling, in part, by binding VAB-1 Eph receptor tyrosine kinase on oocytes and sheath cells to promote oocyte maturation and MAPK activation; MSPs assemble into fibrous networks that drive movement of the C. elegans sperm; msp genes are expressed only in late primary spermatocytes. |
| WBGene00000878 | cyn-2   | ZK520.5 |                |  | cyn-2 is a predicted member of the cytosolic Cyclosporin A-binding cyclophilin family that is functional when expressed in E. coli.                                                                                                                                                                                                                                                                                                                                                                                                                                                                                                                                                                                                              |

|                |        |          |  |  |                                                                                                                                                                                                                                                                                                                                                                                                                                                                                                                                                                                                                                                                                                                                                                                                                                                                                                                                                       |
|----------------|--------|----------|--|--|-------------------------------------------------------------------------------------------------------------------------------------------------------------------------------------------------------------------------------------------------------------------------------------------------------------------------------------------------------------------------------------------------------------------------------------------------------------------------------------------------------------------------------------------------------------------------------------------------------------------------------------------------------------------------------------------------------------------------------------------------------------------------------------------------------------------------------------------------------------------------------------------------------------------------------------------------------|
| WBGene00001424 | fis-1  | F41G3.4  |  |  | <p>fis-1 encodes a protein similar to the yeast and human Fis1 proteins involved in mitochondrial fission; fis-1 does not seem to be required for mitochondrial fission in <i>C. elegans</i>, but it is possible that it may function redundantly along with fis-2 and other genes; fis-1 expression is enriched in the germline.</p>                                                                                                                                                                                                                                                                                                                                                                                                                                                                                                                                                                                                                 |
| WBGene00002227 | klp-17 | W02B12.7 |  |  | <p>klp-17 encodes a C-terminal kinesin motor protein orthologous to <i>Drosophila</i> NCD and <i>Saccharomyces cerevisiae</i> KAR3; by homology, KLP-17 is predicted to function as a minus-end directed motor; loss of klp-17 activity via RNAi results in embryonic lethality generally at the one- or two-cell stage with disorganized mitotic spindles and polyploid nuclei, suggesting that KLP-17 plays a role in chromosome segregation and germline development; in situ hybridization studies reveal that klp-17 mRNA is localized specifically to cell nuclei during early development, from the one-cell stage of embryogenesis until early larval stages; a klp-17::gfp transgene did not yield detectable GFP expression, but did result in a small percentage of morphologically abnormal males and intersexual animals that grew slowly and died upon reaching maturity, consistent with a role for klp-17 in chromosome dynamics.</p> |
| WBGene00004964 | spe-10 | AC3.10   |  |  | <p>spe-10 encodes a DHHC-CRD family zinc-finger transmembrane protein with homologs in other eukaryotes and is predicted to be a palmitoyl transferase; spe-10 is required during spermatogenesis and thus for fertility; specifically, spe-10 is required for the proper biogenesis and functioning of specialized Golgi-derived fibrous body-membranous organelle (FB-MO) complexes during spermatid formation; spe-10 localizes to the FB-MOs of spermatids.</p>                                                                                                                                                                                                                                                                                                                                                                                                                                                                                   |

|                |          |          |  |  |                                                                                                                                                                                                                                                                                                                                                                                                        |
|----------------|----------|----------|--|--|--------------------------------------------------------------------------------------------------------------------------------------------------------------------------------------------------------------------------------------------------------------------------------------------------------------------------------------------------------------------------------------------------------|
| WBGene00004972 | spe-26   | R10H10.2 |  |  | spe-26 encodes a Kelch motif-containing protein similar to the Drosophila proteins kelch and diablo and the Limulus (horseshoe crab) actin-bundling protein scruin; SPE-26 activity is required for several processes including embryogenesis, spermatogenesis, thermotolerance, and regulation of lifespan; SPE-26 mRNA is detected in spermatogonial cells and spermatocytes, but not in spermatids. |
| WBGene00005012 |          | F26F4.2  |  |  | F26F4.2 encodes a novel protein with high similarity to C. elegans F37A8.1 and C. briggsae CBG18186.                                                                                                                                                                                                                                                                                                   |
| WBGene00006050 | ssq-1    | K07F5.11 |  |  |                                                                                                                                                                                                                                                                                                                                                                                                        |
| WBGene00006051 | ssq-2    | T28H11.5 |  |  |                                                                                                                                                                                                                                                                                                                                                                                                        |
| WBGene00006052 | ssq-3    | ZC477.1  |  |  |                                                                                                                                                                                                                                                                                                                                                                                                        |
| WBGene00006056 | sss-1    | F32B6.5  |  |  |                                                                                                                                                                                                                                                                                                                                                                                                        |
| WBGene00006057 | sss-2    | F47B8.11 |  |  |                                                                                                                                                                                                                                                                                                                                                                                                        |
| WBGene00006624 | try-6    | F48A9.3  |  |  |                                                                                                                                                                                                                                                                                                                                                                                                        |
| WBGene00007060 | wht-6    | T26A5.1  |  |  |                                                                                                                                                                                                                                                                                                                                                                                                        |
| WBGene00007080 | sfxn-1.1 | AH6.2    |  |  |                                                                                                                                                                                                                                                                                                                                                                                                        |
| WBGene00007081 |          | AH6.3    |  |  |                                                                                                                                                                                                                                                                                                                                                                                                        |
| WBGene00007082 | acs-10   | AH10.1   |  |  |                                                                                                                                                                                                                                                                                                                                                                                                        |
| WBGene00007159 |          | B0379.7  |  |  |                                                                                                                                                                                                                                                                                                                                                                                                        |
| WBGene00007190 | rmd-3    | B0491.3  |  |  |                                                                                                                                                                                                                                                                                                                                                                                                        |
| WBGene00007230 |          | C01G10.1 |  |  |                                                                                                                                                                                                                                                                                                                                                                                                        |
| WBGene00007301 |          | C04F12.7 |  |  |                                                                                                                                                                                                                                                                                                                                                                                                        |
| WBGene00007306 |          | C04G2.5  |  |  |                                                                                                                                                                                                                                                                                                                                                                                                        |
| WBGene00007307 |          | C04G2.8  |  |  |                                                                                                                                                                                                                                                                                                                                                                                                        |
| WBGene00007308 |          | C04G2.9  |  |  |                                                                                                                                                                                                                                                                                                                                                                                                        |
| WBGene00007337 |          | C05C12.5 |  |  |                                                                                                                                                                                                                                                                                                                                                                                                        |

|                |          |           |  |  |                                                                                                                                                                                                                                                                                                                                                                             |
|----------------|----------|-----------|--|--|-----------------------------------------------------------------------------------------------------------------------------------------------------------------------------------------------------------------------------------------------------------------------------------------------------------------------------------------------------------------------------|
| WBGene00007446 | mboa-4   | C08F8.4   |  |  | mboa-4 encodes a putative transmembrane O-acyl transferase (MBOAT) orthologous to human MBOAT1 (OMIM:611732), and paralogous to C54G7.2 and ZK550.1; MBOA-4 has no obvious function in mass RNAi assays, and mboa-4(RNAi) animals incorporate exogenous arachidonic acid into phosphatidylcholine (PC), phosphatidylserine (PS) and phosphatidylethanolamine (PE) normally. |
| WBGene00007457 |          | C08F11.10 |  |  |                                                                                                                                                                                                                                                                                                                                                                             |
| WBGene00007572 |          | C14A6.8   |  |  |                                                                                                                                                                                                                                                                                                                                                                             |
| WBGene00007597 |          | C15A11.2  |  |  |                                                                                                                                                                                                                                                                                                                                                                             |
| WBGene00007601 |          | C15C6.2   |  |  |                                                                                                                                                                                                                                                                                                                                                                             |
| WBGene00007631 | wht-3    | C16C10.12 |  |  | wht-3 encodes an ATP-binding cassette (ABC) transporter; wht-3 activity is required for efficient RNA interference (RNAi) of a germline-expressed target, pop-1, as well as for normal pharyngeal and body morphology.                                                                                                                                                      |
| WBGene00007733 |          | C25G4.6   |  |  |                                                                                                                                                                                                                                                                                                                                                                             |
| WBGene00007778 |          | C27D8.2   |  |  |                                                                                                                                                                                                                                                                                                                                                                             |
| WBGene00007795 |          | C28D4.8   |  |  |                                                                                                                                                                                                                                                                                                                                                                             |
| WBGene00007898 |          | C33D9.3   |  |  |                                                                                                                                                                                                                                                                                                                                                                             |
| WBGene00007986 |          | C36F7.5   |  |  |                                                                                                                                                                                                                                                                                                                                                                             |
| WBGene00007998 |          | C38C6.5   |  |  |                                                                                                                                                                                                                                                                                                                                                                             |
| WBGene00008001 |          | C38C10.3  |  |  |                                                                                                                                                                                                                                                                                                                                                                             |
| WBGene00008074 | nkb-2    | C43F9.6   |  |  |                                                                                                                                                                                                                                                                                                                                                                             |
| WBGene00008141 |          | C47E8.1   |  |  |                                                                                                                                                                                                                                                                                                                                                                             |
| WBGene00008272 |          | C53B4.2   |  |  |                                                                                                                                                                                                                                                                                                                                                                             |
| WBGene00008312 |          | C54G4.2   |  |  |                                                                                                                                                                                                                                                                                                                                                                             |
| WBGene00008313 |          | C54G4.3   |  |  |                                                                                                                                                                                                                                                                                                                                                                             |
| WBGene00008383 |          | D1081.5   |  |  |                                                                                                                                                                                                                                                                                                                                                                             |
| WBGene00008541 |          | F07A5.2   |  |  |                                                                                                                                                                                                                                                                                                                                                                             |
| WBGene00008590 |          | F08H9.2   |  |  |                                                                                                                                                                                                                                                                                                                                                                             |
| WBGene00008651 |          | F10D11.5  |  |  |                                                                                                                                                                                                                                                                                                                                                                             |
| WBGene00008660 | clec-153 | F10F2.8   |  |  |                                                                                                                                                                                                                                                                                                                                                                             |
| WBGene00008912 |          | F17C8.7   |  |  |                                                                                                                                                                                                                                                                                                                                                                             |
| WBGene00008950 | wht-5    | F19B6.4   |  |  |                                                                                                                                                                                                                                                                                                                                                                             |
| WBGene00009028 |          | F21H7.2   |  |  |                                                                                                                                                                                                                                                                                                                                                                             |
| WBGene00009043 |          | F22B5.5   |  |  |                                                                                                                                                                                                                                                                                                                                                                             |
| WBGene00009075 |          | F23B2.7   |  |  |                                                                                                                                                                                                                                                                                                                                                                             |
| WBGene00009143 |          | F26A3.5   |  |  |                                                                                                                                                                                                                                                                                                                                                                             |
| WBGene00009149 |          | F26D2.10  |  |  |                                                                                                                                                                                                                                                                                                                                                                             |
| WBGene00009185 |          | F27C8.5   |  |  |                                                                                                                                                                                                                                                                                                                                                                             |



|                |       |           |  |  |                                                                                                                                                                                                                                                                                                                                                                                                                                                                                            |
|----------------|-------|-----------|--|--|--------------------------------------------------------------------------------------------------------------------------------------------------------------------------------------------------------------------------------------------------------------------------------------------------------------------------------------------------------------------------------------------------------------------------------------------------------------------------------------------|
| WBGene00009308 |       | F32A11.3  |  |  |                                                                                                                                                                                                                                                                                                                                                                                                                                                                                            |
| WBGene00009313 |       | F32B4.2   |  |  |                                                                                                                                                                                                                                                                                                                                                                                                                                                                                            |
| WBGene00009321 |       | F32B6.4   |  |  |                                                                                                                                                                                                                                                                                                                                                                                                                                                                                            |
| WBGene00009344 |       | F32H2.7   |  |  |                                                                                                                                                                                                                                                                                                                                                                                                                                                                                            |
| WBGene00009446 |       | F35H8.1   |  |  |                                                                                                                                                                                                                                                                                                                                                                                                                                                                                            |
| WBGene00009449 |       | F35H8.4   |  |  |                                                                                                                                                                                                                                                                                                                                                                                                                                                                                            |
| WBGene00009457 |       | F36A2.10  |  |  |                                                                                                                                                                                                                                                                                                                                                                                                                                                                                            |
| WBGene00009458 |       | F36A2.11  |  |  |                                                                                                                                                                                                                                                                                                                                                                                                                                                                                            |
| WBGene00009463 |       | F36D1.4   |  |  |                                                                                                                                                                                                                                                                                                                                                                                                                                                                                            |
| WBGene00009471 |       | F36D3.5   |  |  |                                                                                                                                                                                                                                                                                                                                                                                                                                                                                            |
| WBGene00009501 |       | F37A8.1   |  |  |                                                                                                                                                                                                                                                                                                                                                                                                                                                                                            |
| WBGene00009549 |       | F38H4.5   |  |  |                                                                                                                                                                                                                                                                                                                                                                                                                                                                                            |
| WBGene00009685 |       | F44D12.8  |  |  |                                                                                                                                                                                                                                                                                                                                                                                                                                                                                            |
| WBGene00009708 |       | F44G3.7   |  |  |                                                                                                                                                                                                                                                                                                                                                                                                                                                                                            |
| WBGene00009714 |       | F44G4.5   |  |  |                                                                                                                                                                                                                                                                                                                                                                                                                                                                                            |
| WBGene00010014 |       | F54B3.2   |  |  |                                                                                                                                                                                                                                                                                                                                                                                                                                                                                            |
| WBGene00010035 |       | F54C8.1   |  |  |                                                                                                                                                                                                                                                                                                                                                                                                                                                                                            |
| WBGene00010082 |       | F55A11.11 |  |  | F55A11.11 encodes a member of the histidine phosphatase superfamily orthologous to Bombyx mori ecdysteroid phosphate phosphatase (EPP), human STS1 (OMIM:609201) and human UBASH3A (OMIM:605736); F55A11.11 lacks the consensus sequence for phosphatase activity, and thus is predicted to be catalytically inactive; F55A11.11 is also paralogous to C. elegans C52E4.7, F09C12.8, F53B6.7, and T07F12.1; loss of F55A11.11 activity via large-scale RNAi results in no obvious defects. |
| WBGene00010155 |       | F56F3.4   |  |  |                                                                                                                                                                                                                                                                                                                                                                                                                                                                                            |
| WBGene00010181 |       | F57A8.6   |  |  |                                                                                                                                                                                                                                                                                                                                                                                                                                                                                            |
| WBGene00010241 |       | F58D2.2   |  |  |                                                                                                                                                                                                                                                                                                                                                                                                                                                                                            |
| WBGene00010373 |       | H08M01.1  |  |  |                                                                                                                                                                                                                                                                                                                                                                                                                                                                                            |
| WBGene00010466 |       | K01D12.7  |  |  |                                                                                                                                                                                                                                                                                                                                                                                                                                                                                            |
| WBGene00010486 |       | K01H12.4  |  |  |                                                                                                                                                                                                                                                                                                                                                                                                                                                                                            |
| WBGene00010510 | ent-3 | K02E11.1  |  |  |                                                                                                                                                                                                                                                                                                                                                                                                                                                                                            |
| WBGene00010563 |       | K04G2.4   |  |  |                                                                                                                                                                                                                                                                                                                                                                                                                                                                                            |
| WBGene00010574 |       | K04H4.5   |  |  |                                                                                                                                                                                                                                                                                                                                                                                                                                                                                            |
| WBGene00010612 |       | K07A1.5   |  |  |                                                                                                                                                                                                                                                                                                                                                                                                                                                                                            |
| WBGene00010650 |       | K08C9.1   |  |  |                                                                                                                                                                                                                                                                                                                                                                                                                                                                                            |
| WBGene00010651 |       | K08C9.2   |  |  |                                                                                                                                                                                                                                                                                                                                                                                                                                                                                            |
| WBGene00010679 |       | K08F4.5   |  |  |                                                                                                                                                                                                                                                                                                                                                                                                                                                                                            |
| WBGene00010682 |       | K08F8.5   |  |  |                                                                                                                                                                                                                                                                                                                                                                                                                                                                                            |
| WBGene00010719 |       | K09E4.1   |  |  |                                                                                                                                                                                                                                                                                                                                                                                                                                                                                            |
| WBGene00010728 |       | K09G1.2   |  |  |                                                                                                                                                                                                                                                                                                                                                                                                                                                                                            |
| WBGene00010829 |       | M02B1.4   |  |  |                                                                                                                                                                                                                                                                                                                                                                                                                                                                                            |
| WBGene00010906 |       | M88.3     |  |  |                                                                                                                                                                                                                                                                                                                                                                                                                                                                                            |
| WBGene00011120 |       | R07E5.15  |  |  |                                                                                                                                                                                                                                                                                                                                                                                                                                                                                            |

|                |         |            |  |  |                                                                                                                                                                                                                                                                                                                                                                                                                                                                                                                                                                                                                                                     |
|----------------|---------|------------|--|--|-----------------------------------------------------------------------------------------------------------------------------------------------------------------------------------------------------------------------------------------------------------------------------------------------------------------------------------------------------------------------------------------------------------------------------------------------------------------------------------------------------------------------------------------------------------------------------------------------------------------------------------------------------|
| WBGene00011203 |         | R10E4.7    |  |  |                                                                                                                                                                                                                                                                                                                                                                                                                                                                                                                                                                                                                                                     |
| WBGene00011214 |         | R10E9.2    |  |  |                                                                                                                                                                                                                                                                                                                                                                                                                                                                                                                                                                                                                                                     |
| WBGene00011297 |         | R102.10    |  |  |                                                                                                                                                                                                                                                                                                                                                                                                                                                                                                                                                                                                                                                     |
| WBGene00011322 | irld-14 | T01C3.5    |  |  |                                                                                                                                                                                                                                                                                                                                                                                                                                                                                                                                                                                                                                                     |
| WBGene00011460 | ttr-14  | T05A10.3   |  |  |                                                                                                                                                                                                                                                                                                                                                                                                                                                                                                                                                                                                                                                     |
| WBGene00011491 |         | T05F1.5    |  |  |                                                                                                                                                                                                                                                                                                                                                                                                                                                                                                                                                                                                                                                     |
| WBGene00011669 |         | T09F5.10   |  |  |                                                                                                                                                                                                                                                                                                                                                                                                                                                                                                                                                                                                                                                     |
| WBGene00011790 |         | T15H9.5    |  |  |                                                                                                                                                                                                                                                                                                                                                                                                                                                                                                                                                                                                                                                     |
| WBGene00011795 |         | T16A9.5    |  |  |                                                                                                                                                                                                                                                                                                                                                                                                                                                                                                                                                                                                                                                     |
| WBGene00011910 |         | T22B3.2    |  |  | alg-3 encodes an Argonaute (AGO) protein that is a member of the AGO clade of Argonaute small RNA-binding proteins; together with its paralog, alg-4, alg-3 is required for normal brood sizes at elevated temperatures, specifically for the process of spermiogenesis in which spermatids are converted to mobile ameoboid sperm; alg-3/4 is also required for accumulation of male germline-specific 26G-RNAs, suggesting that alg-3/4 mediate thermotolerant fertility via a 26G-RNA-mediated pathway; a GFP::ALG-3 rescuing fusion protein is expressed in germ cells during spermatogenesis and localizes to the cytoplasm and to P granules. |
| WBGene00011954 |         | T23F11.2   |  |  |                                                                                                                                                                                                                                                                                                                                                                                                                                                                                                                                                                                                                                                     |
| WBGene00011968 |         | T23G11.1   |  |  |                                                                                                                                                                                                                                                                                                                                                                                                                                                                                                                                                                                                                                                     |
| WBGene00012087 |         | T27E7.1    |  |  |                                                                                                                                                                                                                                                                                                                                                                                                                                                                                                                                                                                                                                                     |
| WBGene00012102 |         | T27F6.1    |  |  |                                                                                                                                                                                                                                                                                                                                                                                                                                                                                                                                                                                                                                                     |
| WBGene00012120 |         | T28C6.5    |  |  |                                                                                                                                                                                                                                                                                                                                                                                                                                                                                                                                                                                                                                                     |
| WBGene00012171 |         | W01B6.4    |  |  |                                                                                                                                                                                                                                                                                                                                                                                                                                                                                                                                                                                                                                                     |
| WBGene00012191 |         | W02A2.8    |  |  |                                                                                                                                                                                                                                                                                                                                                                                                                                                                                                                                                                                                                                                     |
| WBGene00012357 |         | W09D6.4    |  |  |                                                                                                                                                                                                                                                                                                                                                                                                                                                                                                                                                                                                                                                     |
| WBGene00012486 |         | Y18D10A.21 |  |  |                                                                                                                                                                                                                                                                                                                                                                                                                                                                                                                                                                                                                                                     |
| WBGene00012547 |         | Y37D8A.5   |  |  |                                                                                                                                                                                                                                                                                                                                                                                                                                                                                                                                                                                                                                                     |
| WBGene00012627 |         | Y38H6C.15  |  |  |                                                                                                                                                                                                                                                                                                                                                                                                                                                                                                                                                                                                                                                     |
| WBGene00012636 |         | Y38H8A.2   |  |  |                                                                                                                                                                                                                                                                                                                                                                                                                                                                                                                                                                                                                                                     |
| WBGene00012711 |         | Y39E4A.1   |  |  |                                                                                                                                                                                                                                                                                                                                                                                                                                                                                                                                                                                                                                                     |
| WBGene00012720 |         | Y39E4B.11  |  |  |                                                                                                                                                                                                                                                                                                                                                                                                                                                                                                                                                                                                                                                     |
| WBGene00012784 |         | Y43C5A.4   |  |  |                                                                                                                                                                                                                                                                                                                                                                                                                                                                                                                                                                                                                                                     |
| WBGene00012809 |         | Y43F8A.2   |  |  |                                                                                                                                                                                                                                                                                                                                                                                                                                                                                                                                                                                                                                                     |
| WBGene00012827 |         | Y43F8C.5   |  |  |                                                                                                                                                                                                                                                                                                                                                                                                                                                                                                                                                                                                                                                     |
| WBGene00012912 |         | Y46G5A.22  |  |  |                                                                                                                                                                                                                                                                                                                                                                                                                                                                                                                                                                                                                                                     |
| WBGene00012925 | wht-8   | Y47D3A.11  |  |  |                                                                                                                                                                                                                                                                                                                                                                                                                                                                                                                                                                                                                                                     |
| WBGene00013052 | scrm-7  | Y50E8A.9   |  |  | scrm-7 encodes a putative phospholipid scramblase homologous to human PLSCR1-5, and paralogous to other C. elegans SCRMs (e.g., SCRM-1); scrm-7(RNAi) animals have no obvious phenotype.                                                                                                                                                                                                                                                                                                                                                                                                                                                            |

|                |        |            |  |  |                                                                                                                                                                                                                                                                                                                                  |
|----------------|--------|------------|--|--|----------------------------------------------------------------------------------------------------------------------------------------------------------------------------------------------------------------------------------------------------------------------------------------------------------------------------------|
| WBGene00013053 |        | Y50E8A.10  |  |  |                                                                                                                                                                                                                                                                                                                                  |
| WBGene00013085 | mpz-6  | Y51B9A.3   |  |  |                                                                                                                                                                                                                                                                                                                                  |
| WBGene00013175 |        | Y53F4B.36  |  |  |                                                                                                                                                                                                                                                                                                                                  |
| WBGene00013190 |        | Y54E2A.5   |  |  |                                                                                                                                                                                                                                                                                                                                  |
| WBGene00013303 |        | Y57G11C.5  |  |  |                                                                                                                                                                                                                                                                                                                                  |
| WBGene00013429 |        | Y66D12A.3  |  |  |                                                                                                                                                                                                                                                                                                                                  |
| WBGene00013437 |        | Y66D12A.11 |  |  |                                                                                                                                                                                                                                                                                                                                  |
| WBGene00013449 |        | Y67A6A.1   |  |  |                                                                                                                                                                                                                                                                                                                                  |
| WBGene00013474 |        | Y69E1A.2   |  |  |                                                                                                                                                                                                                                                                                                                                  |
| WBGene00013524 |        | Y73F8A.15  |  |  |                                                                                                                                                                                                                                                                                                                                  |
| WBGene00013526 |        | Y73F8A.20  |  |  |                                                                                                                                                                                                                                                                                                                                  |
| WBGene00013684 |        | Y105E8A.27 |  |  |                                                                                                                                                                                                                                                                                                                                  |
| WBGene00013696 |        | Y106G6A.4  |  |  |                                                                                                                                                                                                                                                                                                                                  |
| WBGene00013700 |        | Y106G6D.3  |  |  |                                                                                                                                                                                                                                                                                                                                  |
| WBGene00013712 | dlc-6  | Y106G6G.3  |  |  | dlc-6 encodes a putative dynein light chain 1; DLC-6 is orthologous to human DYNLL1 (OMIM:601562) and DYNLL2 (OMIM:608942), but much more divergent from them than its paralog DLC-1; DLC-6's other paralogs are DLC-2/-5; DLC-6 has no obvious function in mass RNAi assays.                                                    |
| WBGene00013723 |        | Y106G6H.13 |  |  |                                                                                                                                                                                                                                                                                                                                  |
| WBGene00013785 | nep-23 | Y116A8C.4  |  |  | Y116A8C.4 encodes a neprilysin; neprilysins are thermolysin-like zinc metallopeptidases, found on the outer surface of animal cells, that negatively regulate small signalling peptides (e.g., enkephalin, tachykinin, insulin, and natriuretic peptides) by cleaving them; Y116A8C.4 has no clear orthologs in other organisms. |
| WBGene00013879 |        | ZC376.8    |  |  |                                                                                                                                                                                                                                                                                                                                  |
| WBGene00013886 |        | ZC412.5    |  |  |                                                                                                                                                                                                                                                                                                                                  |
| WBGene00013956 |        | ZK265.3    |  |  |                                                                                                                                                                                                                                                                                                                                  |
| WBGene00014116 |        | ZK858.2    |  |  |                                                                                                                                                                                                                                                                                                                                  |
| WBGene00014127 |        | ZK892.3    |  |  |                                                                                                                                                                                                                                                                                                                                  |
| WBGene00014154 |        | ZK930.4    |  |  |                                                                                                                                                                                                                                                                                                                                  |
| WBGene00014168 |        | ZK945.6    |  |  |                                                                                                                                                                                                                                                                                                                                  |
| WBGene00014169 |        | ZK945.7    |  |  |                                                                                                                                                                                                                                                                                                                                  |
| WBGene00014179 |        | ZK1010.5   |  |  |                                                                                                                                                                                                                                                                                                                                  |
| WBGene00014197 |        | ZK1053.2   |  |  |                                                                                                                                                                                                                                                                                                                                  |
| WBGene00014238 |        | ZK1225.4   |  |  |                                                                                                                                                                                                                                                                                                                                  |
| WBGene00014241 |        | ZK1251.3   |  |  |                                                                                                                                                                                                                                                                                                                                  |

|                |        |           |  |  |                                                                                                                                                                                                                                                                                                                                                                                                                                                                                                                                                                                                                                               |
|----------------|--------|-----------|--|--|-----------------------------------------------------------------------------------------------------------------------------------------------------------------------------------------------------------------------------------------------------------------------------------------------------------------------------------------------------------------------------------------------------------------------------------------------------------------------------------------------------------------------------------------------------------------------------------------------------------------------------------------------|
| WBGene00015034 |        | B0207.11  |  |  | B0207.11 encodes a nematode-specific protein probably required for a normally high ovulation rate; B0207.11 has no obvious non-nematode homologs, but does have a putative N-terminal coiled-coil domain and an SH2 motif, and is is paralogous to four other C. elegans proteins (F42G4.6, F44F4.10, T08G11.2, and Y81G3A.1); B0207.11(tm322) hermaphrodites show abnormal egg-laying, retaining significantly fewer eggs than wild-type (perhaps due to a lowered ovulation rate) while retaining late-stage embryos; B0207.11 has no obvious phenotype in mass RNAi experiments, possibly because of genetic redundancy with its paralogs. |
| WBGene00015051 |        | B0218.7   |  |  |                                                                                                                                                                                                                                                                                                                                                                                                                                                                                                                                                                                                                                               |
| WBGene00015094 |        | B0261.6   |  |  |                                                                                                                                                                                                                                                                                                                                                                                                                                                                                                                                                                                                                                               |
| WBGene00015097 |        | B0273.1   |  |  |                                                                                                                                                                                                                                                                                                                                                                                                                                                                                                                                                                                                                                               |
| WBGene00015192 |        | B0432.11  |  |  |                                                                                                                                                                                                                                                                                                                                                                                                                                                                                                                                                                                                                                               |
| WBGene00015241 |        | B0524.2   |  |  |                                                                                                                                                                                                                                                                                                                                                                                                                                                                                                                                                                                                                                               |
| WBGene00015345 |        | C02F5.2   |  |  |                                                                                                                                                                                                                                                                                                                                                                                                                                                                                                                                                                                                                                               |
| WBGene00015348 |        | C02F5.5   |  |  |                                                                                                                                                                                                                                                                                                                                                                                                                                                                                                                                                                                                                                               |
| WBGene00015467 | basl-1 | C05D2.3   |  |  | C05D2.3 generally resembles aromatic-L-amino-acid/L-histidine decarboxylases; however, its predicted protein sequence lacks six residues critical for AADC function.                                                                                                                                                                                                                                                                                                                                                                                                                                                                          |
| WBGene00015627 |        | C09B9.2   |  |  |                                                                                                                                                                                                                                                                                                                                                                                                                                                                                                                                                                                                                                               |
| WBGene00015689 |        | C10G11.9  |  |  |                                                                                                                                                                                                                                                                                                                                                                                                                                                                                                                                                                                                                                               |
| WBGene00015690 |        | C10G11.10 |  |  |                                                                                                                                                                                                                                                                                                                                                                                                                                                                                                                                                                                                                                               |
| WBGene00015765 |        | C14C11.1  |  |  |                                                                                                                                                                                                                                                                                                                                                                                                                                                                                                                                                                                                                                               |
| WBGene00015820 |        | C16A11.7  |  |  |                                                                                                                                                                                                                                                                                                                                                                                                                                                                                                                                                                                                                                               |
| WBGene00015937 |        | C17H12.12 |  |  |                                                                                                                                                                                                                                                                                                                                                                                                                                                                                                                                                                                                                                               |
| WBGene00015944 |        | C18A3.7   |  |  |                                                                                                                                                                                                                                                                                                                                                                                                                                                                                                                                                                                                                                               |
| WBGene00015987 |        | C18G1.9   |  |  |                                                                                                                                                                                                                                                                                                                                                                                                                                                                                                                                                                                                                                               |
| WBGene00016054 |        | C24D10.2  |  |  |                                                                                                                                                                                                                                                                                                                                                                                                                                                                                                                                                                                                                                               |
| WBGene00016058 | nspd-3 | C24D10.7  |  |  |                                                                                                                                                                                                                                                                                                                                                                                                                                                                                                                                                                                                                                               |
| WBGene00016161 |        | C27D6.3   |  |  |                                                                                                                                                                                                                                                                                                                                                                                                                                                                                                                                                                                                                                               |
| WBGene00016181 |        | C28C12.11 |  |  |                                                                                                                                                                                                                                                                                                                                                                                                                                                                                                                                                                                                                                               |
| WBGene00016212 |        | C29F5.3   |  |  | C29F5.3 encodes a cytidine deaminase; by homology the product of C29F5.3 is predicted to function in deamination of cytidine to uridine.                                                                                                                                                                                                                                                                                                                                                                                                                                                                                                      |
| WBGene00016288 |        | C31H1.5   |  |  |                                                                                                                                                                                                                                                                                                                                                                                                                                                                                                                                                                                                                                               |
| WBGene00016322 |        | C32E8.4   |  |  |                                                                                                                                                                                                                                                                                                                                                                                                                                                                                                                                                                                                                                               |
| WBGene00016351 |        | C33F10.1  |  |  |                                                                                                                                                                                                                                                                                                                                                                                                                                                                                                                                                                                                                                               |
| WBGene00016414 |        | C34F11.2  |  |  |                                                                                                                                                                                                                                                                                                                                                                                                                                                                                                                                                                                                                                               |

|                |        |          |  |  |                                                                                                                                                                                                                                                                                                                                |
|----------------|--------|----------|--|--|--------------------------------------------------------------------------------------------------------------------------------------------------------------------------------------------------------------------------------------------------------------------------------------------------------------------------------|
| WBGene00016440 | gipc-1 | C35D10.2 |  |  |                                                                                                                                                                                                                                                                                                                                |
| WBGene00016512 |        | C38C3.3  |  |  |                                                                                                                                                                                                                                                                                                                                |
| WBGene00016612 |        | C43G2.3  |  |  |                                                                                                                                                                                                                                                                                                                                |
| WBGene00016707 |        | C46E10.1 |  |  |                                                                                                                                                                                                                                                                                                                                |
| WBGene00016752 |        | C48E7.7  |  |  |                                                                                                                                                                                                                                                                                                                                |
| WBGene00016807 |        | C50D2.3  |  |  |                                                                                                                                                                                                                                                                                                                                |
| WBGene00016825 |        | C50E10.1 |  |  |                                                                                                                                                                                                                                                                                                                                |
| WBGene00016843 |        | C50F7.3  |  |  |                                                                                                                                                                                                                                                                                                                                |
| WBGene00016996 |        | D1005.2  |  |  |                                                                                                                                                                                                                                                                                                                                |
| WBGene00017026 |        | D1037.5  |  |  | D1037.5 encodes a phospholipase A2.                                                                                                                                                                                                                                                                                            |
| WBGene00017058 |        | D2062.6  |  |  |                                                                                                                                                                                                                                                                                                                                |
| WBGene00017112 |        | E03H12.5 |  |  |                                                                                                                                                                                                                                                                                                                                |
| WBGene00017175 | irld-3 | F02C9.4  |  |  |                                                                                                                                                                                                                                                                                                                                |
| WBGene00017215 |        | F07F6.1  |  |  |                                                                                                                                                                                                                                                                                                                                |
| WBGene00017279 |        | F09C12.8 |  |  | F09C12.8 encodes an ortholog, predicted to be catalytically inactive, of Bombyx mori ecdysteroid phosphate phosphatase (EPP), human STS1 (OMIM:609201) and human UBASH3A (OMIM:605736); F09C12.8 is also paralogous to C. elegans C52E4.7, F53B6.7, F55A11.11, and T07F12.1.                                                   |
| WBGene00017384 |        | F11G11.4 |  |  |                                                                                                                                                                                                                                                                                                                                |
| WBGene00017386 | nspd-5 | F11G11.8 |  |  |                                                                                                                                                                                                                                                                                                                                |
| WBGene00017387 | mpst-4 | F11G11.9 |  |  |                                                                                                                                                                                                                                                                                                                                |
| WBGene00017542 |        | F17E9.5  |  |  | F17E9.5 encodes a novel protein conserved amongst nematodes.                                                                                                                                                                                                                                                                   |
| WBGene00017550 | nep-6  | F18A12.1 |  |  | F18A12.1 encodes a neprilysin; neprilysins are thermolysin-like zinc metallopeptidases, found on the outer surface of animal cells, that negatively regulate small signalling peptides (e.g., enkephalin, tachykinin, insulin, and natriuretic peptides) by cleaving them; F18A12.1 has no clear orthologs in other organisms. |

|                |         |           |  |  |                                                                                                                                                                                                                                                                                                                                |
|----------------|---------|-----------|--|--|--------------------------------------------------------------------------------------------------------------------------------------------------------------------------------------------------------------------------------------------------------------------------------------------------------------------------------|
| WBGene00017553 | nep-8   | F18A12.4  |  |  | F18A12.4 encodes a neprilysin; neprilysins are thermolysin-like zinc metallopeptidases, found on the outer surface of animal cells, that negatively regulate small signalling peptides (e.g., enkephalin, tachykinin, insulin, and natriuretic peptides) by cleaving them; F18A12.4 has no clear orthologs in other organisms. |
| WBGene00017851 |         | F27C1.1   |  |  |                                                                                                                                                                                                                                                                                                                                |
| WBGene00017853 |         | F27C1.3   |  |  |                                                                                                                                                                                                                                                                                                                                |
| WBGene00017902 |         | F28E10.4  |  |  |                                                                                                                                                                                                                                                                                                                                |
| WBGene00017910 |         | F28H1.5   |  |  |                                                                                                                                                                                                                                                                                                                                |
| WBGene00017955 |         | F31E8.5   |  |  |                                                                                                                                                                                                                                                                                                                                |
| WBGene00018000 |         | F33D11.1  |  |  |                                                                                                                                                                                                                                                                                                                                |
| WBGene00018001 |         | F33D11.2  |  |  |                                                                                                                                                                                                                                                                                                                                |
| WBGene00018081 |         | F36A4.2   |  |  |                                                                                                                                                                                                                                                                                                                                |
| WBGene00018083 |         | F36A4.4   |  |  |                                                                                                                                                                                                                                                                                                                                |
| WBGene00018087 |         | F36D4.1   |  |  |                                                                                                                                                                                                                                                                                                                                |
| WBGene00018120 |         | F36H12.4  |  |  |                                                                                                                                                                                                                                                                                                                                |
| WBGene00018125 | rmd-4   | F36H12.11 |  |  |                                                                                                                                                                                                                                                                                                                                |
| WBGene00018134 |         | F37A4.4   |  |  |                                                                                                                                                                                                                                                                                                                                |
| WBGene00018158 |         | F37E3.3   |  |  |                                                                                                                                                                                                                                                                                                                                |
| WBGene00018163 |         | F38A5.6   |  |  |                                                                                                                                                                                                                                                                                                                                |
| WBGene00018196 | nep-13  | F39E9.4   |  |  | F39E9.4 encodes a neprilysin; neprilysins are thermolysin-like zinc metallopeptidases, found on the outer surface of animal cells, that negatively regulate small signalling peptides (e.g., enkephalin, tachykinin, insulin, and natriuretic peptides) by cleaving them; F39E9.4 has no clear orthologs in other organisms.   |
| WBGene00018360 | irld-8  | F42G8.9   |  |  |                                                                                                                                                                                                                                                                                                                                |
| WBGene00018497 |         | F46F5.6   |  |  |                                                                                                                                                                                                                                                                                                                                |
| WBGene00018548 | clec-79 | F47C12.4  |  |  |                                                                                                                                                                                                                                                                                                                                |
| WBGene00018563 |         | F47D12.7  |  |  |                                                                                                                                                                                                                                                                                                                                |
| WBGene00018792 |         | F54C1.8   |  |  |                                                                                                                                                                                                                                                                                                                                |
| WBGene00018926 |         | F56A11.6  |  |  |                                                                                                                                                                                                                                                                                                                                |
| WBGene00018930 |         | F56B3.6   |  |  |                                                                                                                                                                                                                                                                                                                                |
| WBGene00019024 |         | F58A6.5   |  |  |                                                                                                                                                                                                                                                                                                                                |
| WBGene00019084 |         | F59A6.2   |  |  |                                                                                                                                                                                                                                                                                                                                |

|                |         |             |  |  |                                                                                                                                                                                                                                                                                                                              |
|----------------|---------|-------------|--|--|------------------------------------------------------------------------------------------------------------------------------------------------------------------------------------------------------------------------------------------------------------------------------------------------------------------------------|
| WBGene00019151 | pck-3   | H04M03.1    |  |  | H04M03.1 is one of three <i>C. elegans</i> genes that encodes proteins with similarity to phosphoenolpyruvate carboxykinase (PEPCK); by similarity, the products of H04M03.1 are predicted to function in gluconeogenesis.                                                                                                   |
| WBGene00019255 |         | H32C10.1    |  |  |                                                                                                                                                                                                                                                                                                                              |
| WBGene00019260 |         | H34I24.1    |  |  |                                                                                                                                                                                                                                                                                                                              |
| WBGene00019406 | acdh-8  | K05F1.3     |  |  |                                                                                                                                                                                                                                                                                                                              |
| WBGene00019430 |         | K06A5.2     |  |  |                                                                                                                                                                                                                                                                                                                              |
| WBGene00019561 |         | K09C6.7     |  |  |                                                                                                                                                                                                                                                                                                                              |
| WBGene00019785 |         | M70.3       |  |  |                                                                                                                                                                                                                                                                                                                              |
| WBGene00019810 |         | R01H2.2     |  |  |                                                                                                                                                                                                                                                                                                                              |
| WBGene00020105 |         | R148.7      |  |  |                                                                                                                                                                                                                                                                                                                              |
| WBGene00020293 | nep-20  | T06D4.4     |  |  | T06D4.4 encodes a neprilysin; neprilysins are thermolysin-like zinc metallopeptidases, found on the outer surface of animal cells, that negatively regulate small signalling peptides (e.g., enkephalin, tachykinin, insulin, and natriuretic peptides) by cleaving them; T06D4.4 has no clear orthologs in other organisms. |
| WBGene00020353 |         | T08B6.4     |  |  |                                                                                                                                                                                                                                                                                                                              |
| WBGene00020414 |         | T10E9.4     |  |  |                                                                                                                                                                                                                                                                                                                              |
| WBGene00020533 |         | T16A1.2     |  |  |                                                                                                                                                                                                                                                                                                                              |
| WBGene00020713 |         | T23B3.5     |  |  |                                                                                                                                                                                                                                                                                                                              |
| WBGene00020715 | nspd-4  | T23B7.1     |  |  |                                                                                                                                                                                                                                                                                                                              |
| WBGene00020905 |         | T28H11.7    |  |  |                                                                                                                                                                                                                                                                                                                              |
| WBGene00020940 |         | W02D7.4     |  |  |                                                                                                                                                                                                                                                                                                                              |
| WBGene00020986 |         | W03D8.3     |  |  |                                                                                                                                                                                                                                                                                                                              |
| WBGene00020990 |         | W03D8.9     |  |  |                                                                                                                                                                                                                                                                                                                              |
| WBGene00021010 |         | W03G1.2     |  |  |                                                                                                                                                                                                                                                                                                                              |
| WBGene00021386 |         | Y37F4.5     |  |  |                                                                                                                                                                                                                                                                                                                              |
| WBGene00021398 |         | Y38C1AA.7   |  |  |                                                                                                                                                                                                                                                                                                                              |
| WBGene00021472 |         | Y39G10AR.16 |  |  |                                                                                                                                                                                                                                                                                                                              |
| WBGene00021579 | clec-73 | Y46C8AL.1   |  |  |                                                                                                                                                                                                                                                                                                                              |
| WBGene00021608 |         | Y46H3D.1    |  |  |                                                                                                                                                                                                                                                                                                                              |
| WBGene00021633 |         | Y47G6A.3    |  |  |                                                                                                                                                                                                                                                                                                                              |
| WBGene00021650 |         | Y47G6A.26   |  |  |                                                                                                                                                                                                                                                                                                                              |
| WBGene00021720 |         | Y49F6B.8    |  |  |                                                                                                                                                                                                                                                                                                                              |
| WBGene00021787 |         | Y51H7C.9    |  |  |                                                                                                                                                                                                                                                                                                                              |
| WBGene00021878 |         | Y54G2A.13   |  |  |                                                                                                                                                                                                                                                                                                                              |
| WBGene00021880 |         | Y54G2A.15   |  |  |                                                                                                                                                                                                                                                                                                                              |
| WBGene00021969 |         | Y57G7A.6    |  |  |                                                                                                                                                                                                                                                                                                                              |
| WBGene00021996 |         | Y59E9AL.6   |  |  |                                                                                                                                                                                                                                                                                                                              |
| WBGene00022162 |         | Y71G12B.27  |  |  |                                                                                                                                                                                                                                                                                                                              |

|                |         |           |  |  |                                                                                                                                                                                                                                                                                                                                                                                                                                                                                                                                                                                                                                                                                                                                                                                                                                                                                                                                                                                                                 |
|----------------|---------|-----------|--|--|-----------------------------------------------------------------------------------------------------------------------------------------------------------------------------------------------------------------------------------------------------------------------------------------------------------------------------------------------------------------------------------------------------------------------------------------------------------------------------------------------------------------------------------------------------------------------------------------------------------------------------------------------------------------------------------------------------------------------------------------------------------------------------------------------------------------------------------------------------------------------------------------------------------------------------------------------------------------------------------------------------------------|
| WBGene00022288 |         | Y75B7B.1  |  |  |                                                                                                                                                                                                                                                                                                                                                                                                                                                                                                                                                                                                                                                                                                                                                                                                                                                                                                                                                                                                                 |
| WBGene00022385 |         | Y95B8A.4  |  |  |                                                                                                                                                                                                                                                                                                                                                                                                                                                                                                                                                                                                                                                                                                                                                                                                                                                                                                                                                                                                                 |
| WBGene00022467 |         | Y119C1B.1 |  |  |                                                                                                                                                                                                                                                                                                                                                                                                                                                                                                                                                                                                                                                                                                                                                                                                                                                                                                                                                                                                                 |
| WBGene00022530 |         | ZC155.2   |  |  |                                                                                                                                                                                                                                                                                                                                                                                                                                                                                                                                                                                                                                                                                                                                                                                                                                                                                                                                                                                                                 |
| WBGene00022650 |         | ZK84.2    |  |  |                                                                                                                                                                                                                                                                                                                                                                                                                                                                                                                                                                                                                                                                                                                                                                                                                                                                                                                                                                                                                 |
| WBGene00022689 | math-48 | ZK250.6   |  |  |                                                                                                                                                                                                                                                                                                                                                                                                                                                                                                                                                                                                                                                                                                                                                                                                                                                                                                                                                                                                                 |
| WBGene00022700 |         | ZK353.4   |  |  |                                                                                                                                                                                                                                                                                                                                                                                                                                                                                                                                                                                                                                                                                                                                                                                                                                                                                                                                                                                                                 |
| WBGene00022761 |         | ZK546.4   |  |  |                                                                                                                                                                                                                                                                                                                                                                                                                                                                                                                                                                                                                                                                                                                                                                                                                                                                                                                                                                                                                 |
| WBGene00022771 |         | ZK616.1   |  |  |                                                                                                                                                                                                                                                                                                                                                                                                                                                                                                                                                                                                                                                                                                                                                                                                                                                                                                                                                                                                                 |
| WBGene00022849 | acs-6   | ZK1127.2  |  |  |                                                                                                                                                                                                                                                                                                                                                                                                                                                                                                                                                                                                                                                                                                                                                                                                                                                                                                                                                                                                                 |
| WBGene00023424 |         | C53D6.10  |  |  |                                                                                                                                                                                                                                                                                                                                                                                                                                                                                                                                                                                                                                                                                                                                                                                                                                                                                                                                                                                                                 |
| WBGene00044674 |         | B0280.17  |  |  |                                                                                                                                                                                                                                                                                                                                                                                                                                                                                                                                                                                                                                                                                                                                                                                                                                                                                                                                                                                                                 |
| WBGene00044684 |         | T08G11.2  |  |  | <p>T08G11.2 encodes a nematode-specific sperm protein, required for a normally high ovulation rate, that interacts with EGL-32; despite not being EGL-32, and although T08G11.2(tm336) complements egl-32(n155), T08G11.2 can partially rescue egl-32 mutants when expressed transgenically, implying that T08G11.2 can be a nonorthologous replacement for EGL-32 function in vivo; T08G11.2 has an SH2 motif, but this motif lacks a critical arginine residue; T08G11.2 has no obvious non-nematode homologs, but is paralogous to four other <i>C. elegans</i> proteins (B0207.11, F42G4.6, F44F4.10, and Y81G3A.1); T08G11.2(tm336) hermaphrodites have a lowered ovulation rate (and thus a lowered rate of egg-laying), retaining significantly fewer eggs than wild-type, yet also retaining late-stage embryos; T08G11.2 has no obvious phenotype in mass RNAi experiments, possibly because of genetic redundancy with its paralogs; T08G11.2 expression is strongly enriched in spermatogenesis.</p> |
| WBGene00045306 |         | ZC250.5   |  |  |                                                                                                                                                                                                                                                                                                                                                                                                                                                                                                                                                                                                                                                                                                                                                                                                                                                                                                                                                                                                                 |
| WBGene00045484 |         | F34D10.9  |  |  |                                                                                                                                                                                                                                                                                                                                                                                                                                                                                                                                                                                                                                                                                                                                                                                                                                                                                                                                                                                                                 |
